# Supplementary material for: An Integrated Genomic Strategy Delineates Candidate Mediator Genes Regulating Grain Size and Weight in Rice
Source: PubMed Central journal article supplement (PMC4802383; doi:10.1038/srep23253), 2016-03-22
Supplement: srep23253-s1.pdf [file srep23253-s1.pdf]

# **An Integrated Genomic Strategy Delineates Candidate Mediator Genes Regulating Grain Size and Weight in Rice**

**Naveen Malik<sup>1\*</sup>, Nidhi Dwivedi<sup>1\*</sup>, Ashok K. Singh<sup>2</sup>, Swarup K. Parida<sup>1</sup>, Pinky Agarwal<sup>1</sup>, Jitendra K. Thakur<sup>1</sup> & Akhilesh K. Tyagi<sup>1</sup>**

<sup>1</sup>National Institute of Plant Genome Research (NIPGR), Aruna Asaf Ali Marg, New Delhi 110067, India

<sup>2</sup>Division of Genetics, Rice Section, Indian Agricultural Research Institute (IARI), New Delhi 110012, India

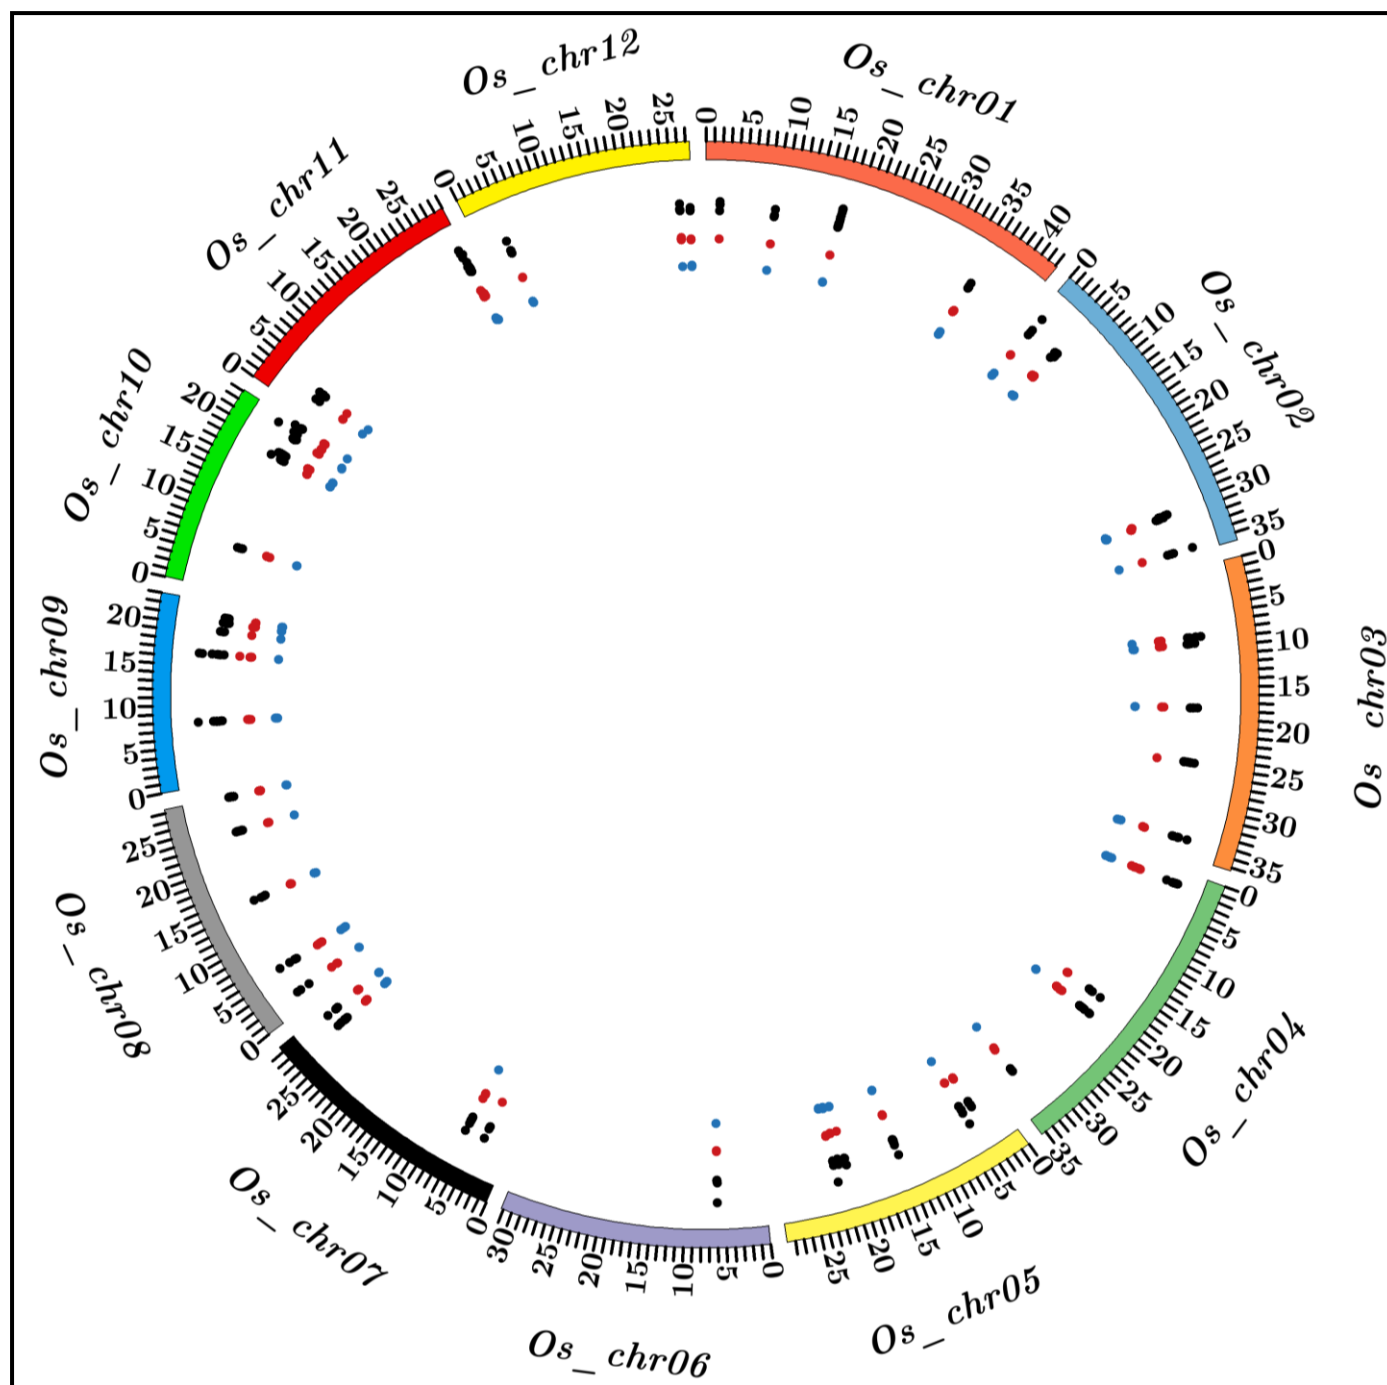

**Figure S1.** The relative distribution of 3971 *MED* genes-derived SNPs physically mapped on 12 rice chromosomes is illustrated by a Circos circular ideogram. The outermost circle indicates the physical size (Mb) of 12 rice chromosome-pseudomolecules coded with multiple colours. The black (all SNPs), red (non-synonymous and regulatory SNPs) and blue (synonymous SNPs) dots represent different types of coding and non-coding SNPs mined from the 55 *MED* genes.

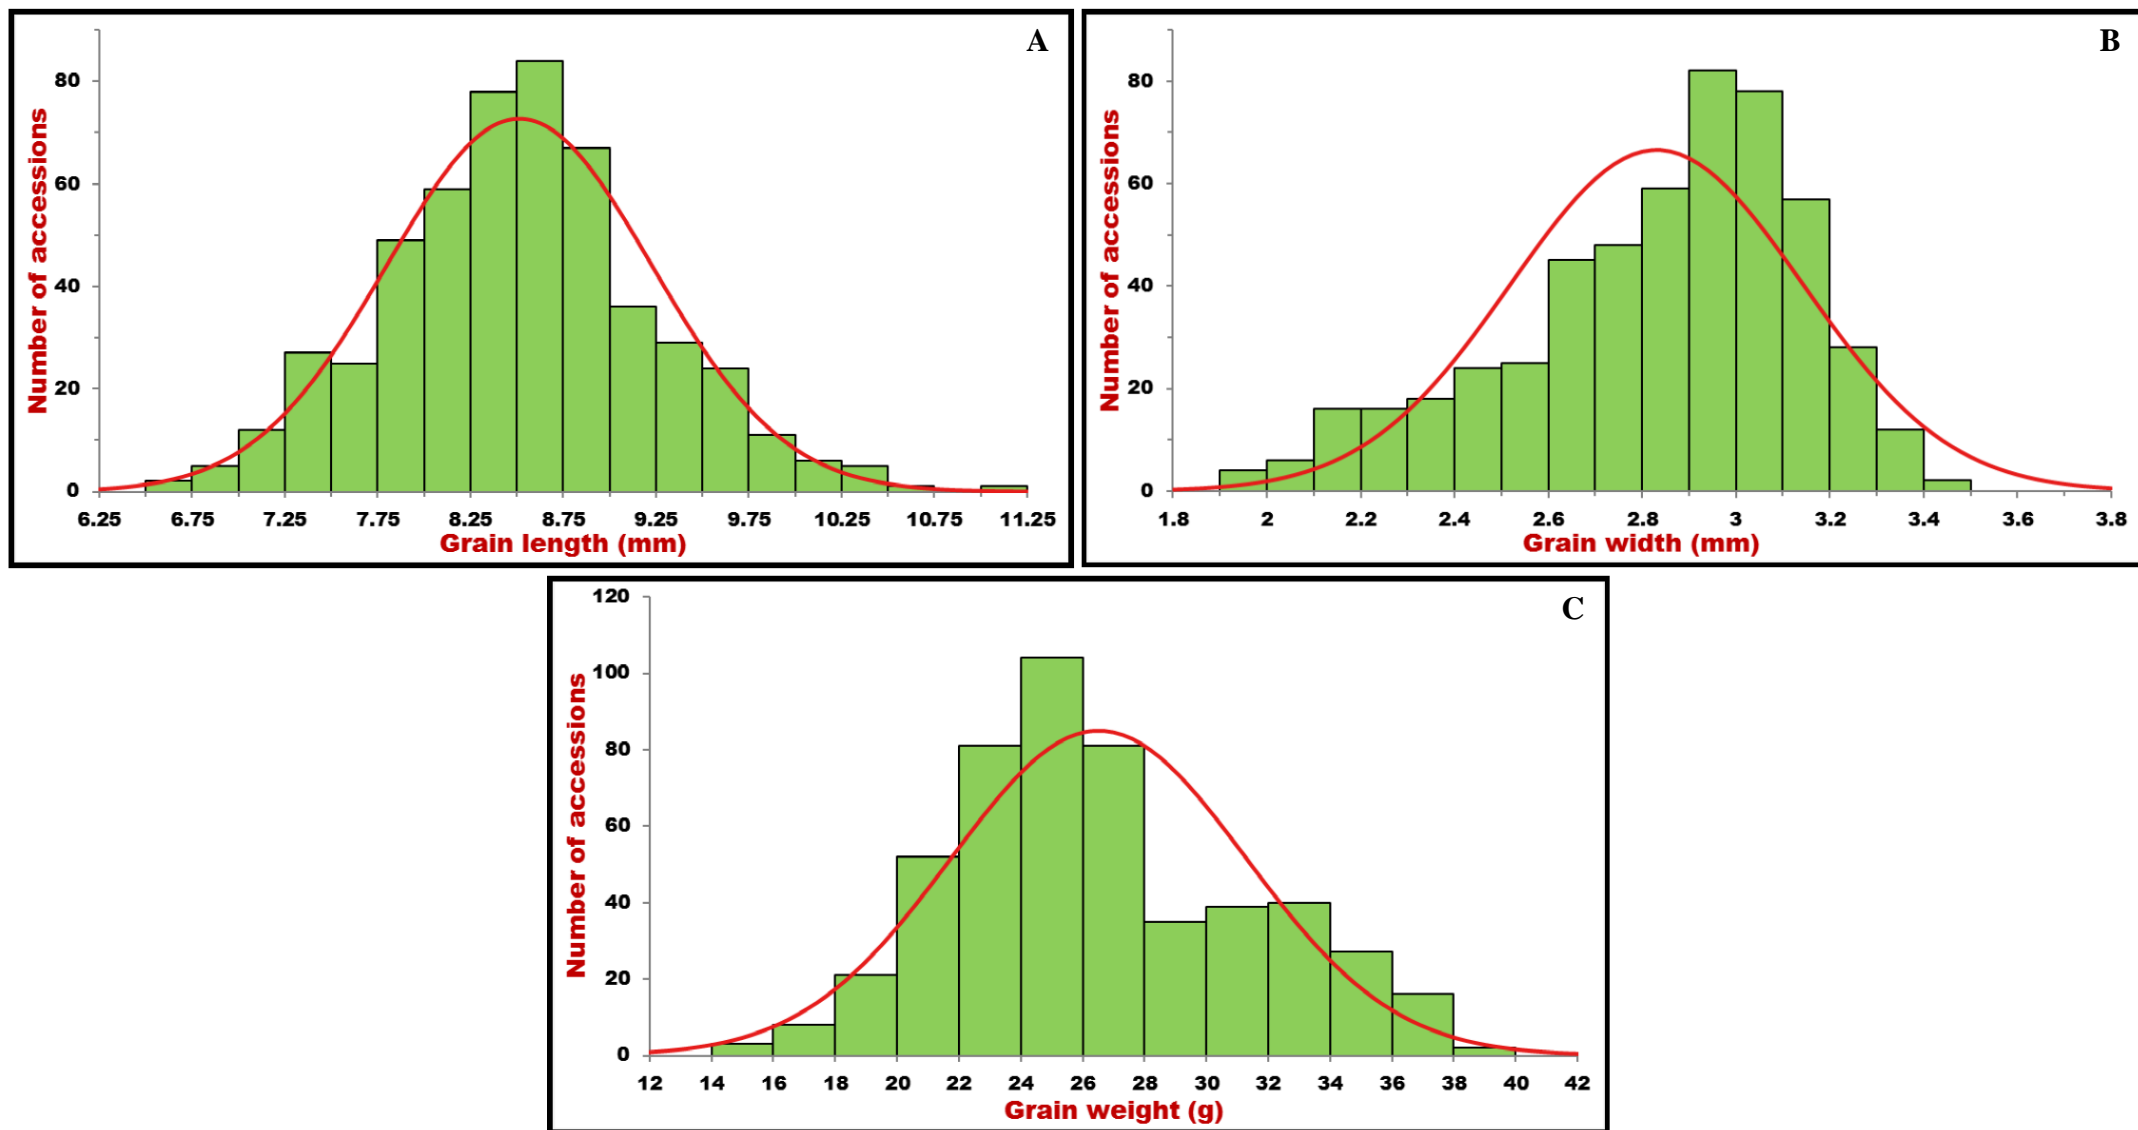

**Figure S2.** Frequency distribution of grain length (mm) (A), grain width (mm) (B) and 1000-grain weight (g) (C) trait variations among 384 rice accessions (association panel) depicting a normal distribution.

■ LGR   
 ■ PB1121   
 ■ IR64   
 ■ NIPPONBARE   
 ■ SONASAL   
 ■ BINDLI

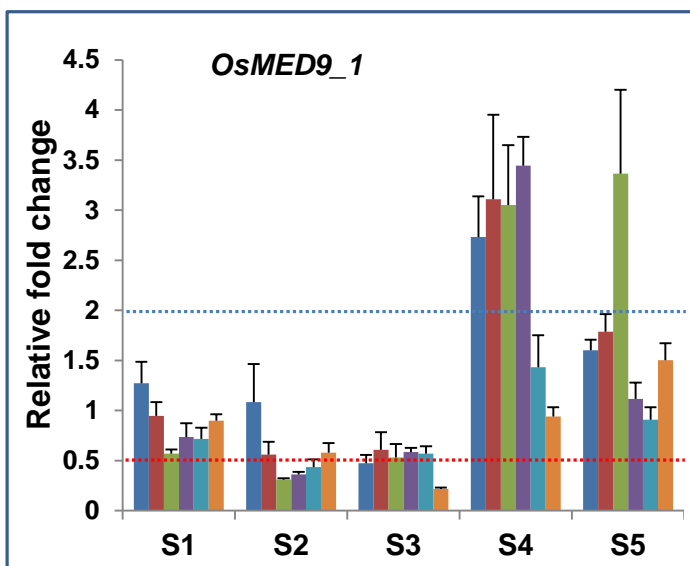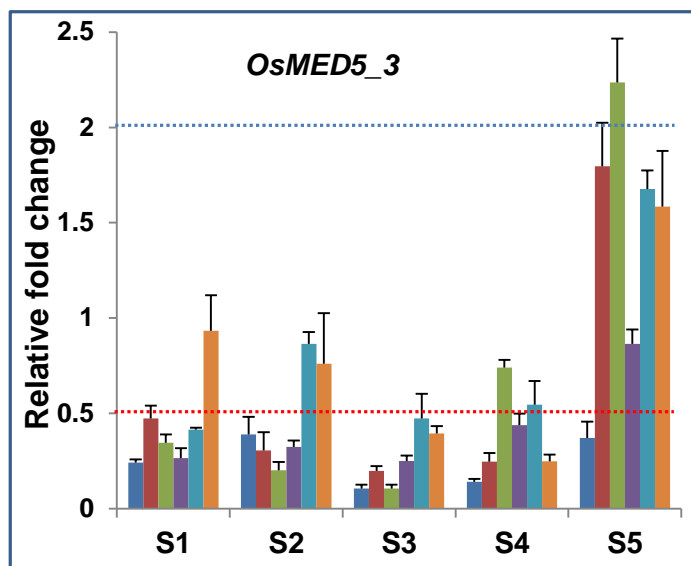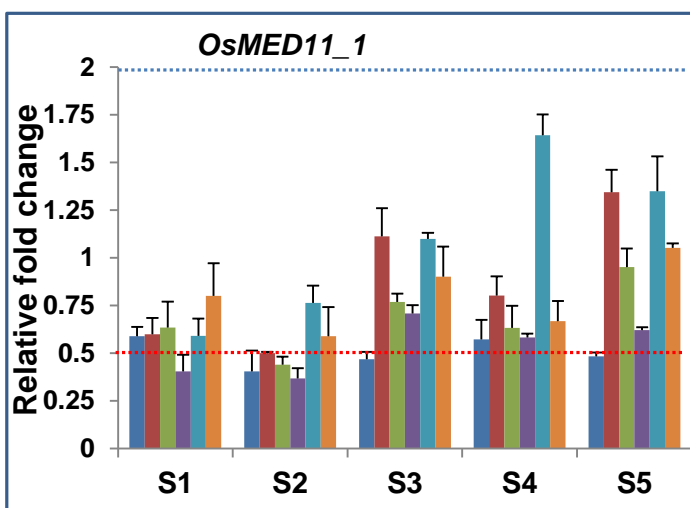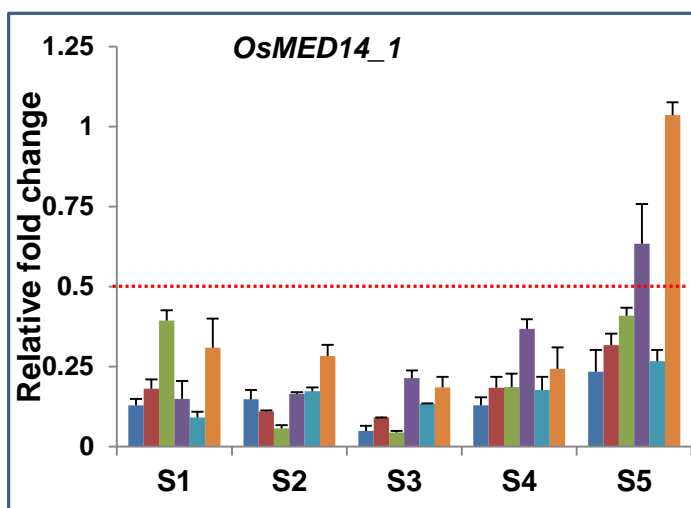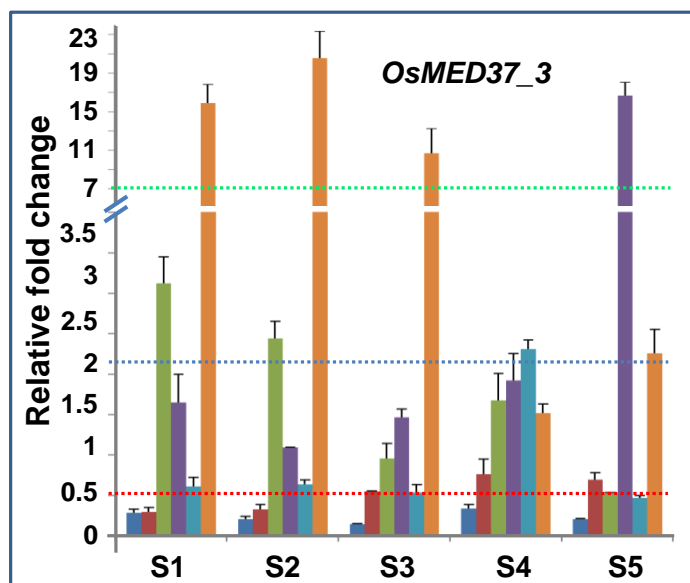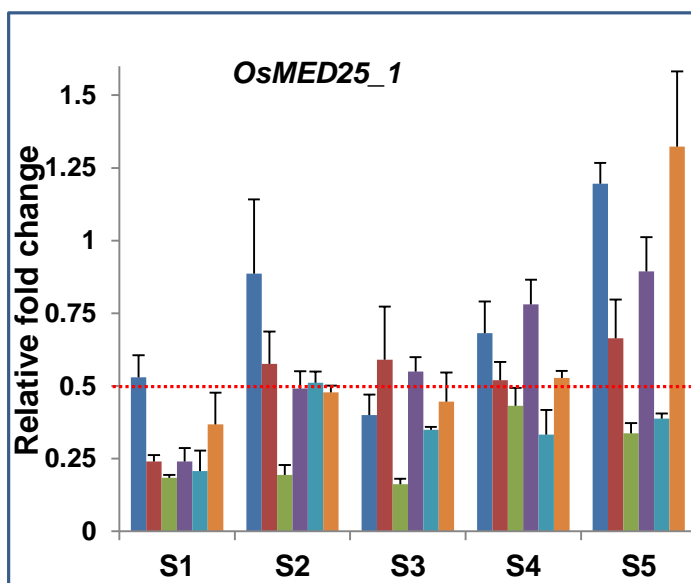

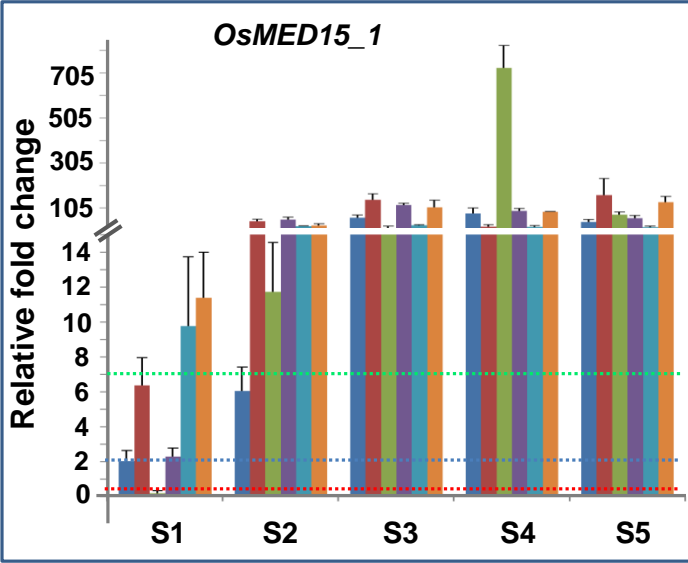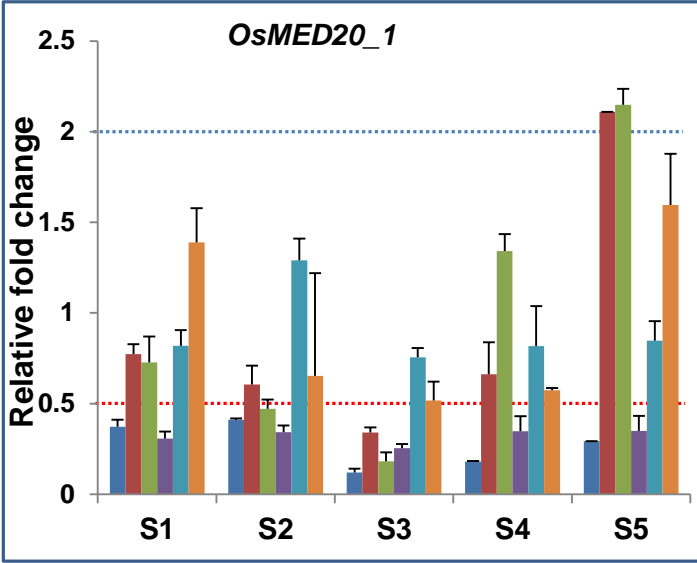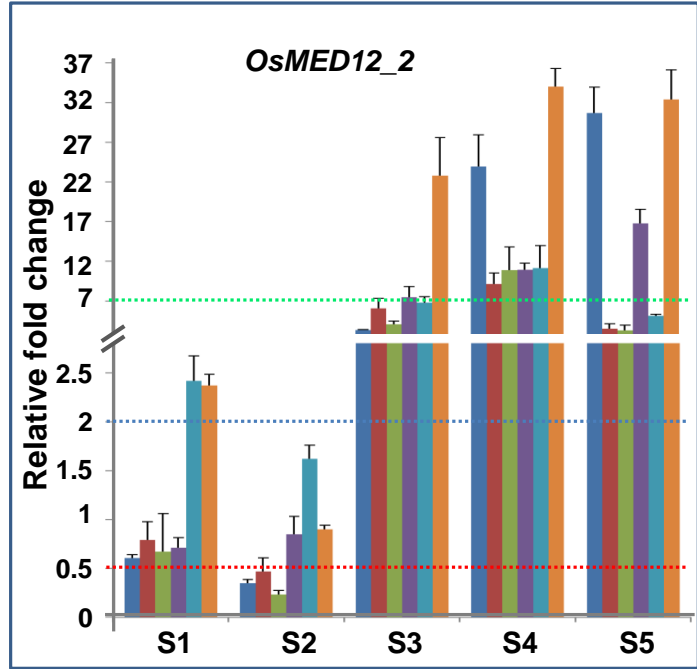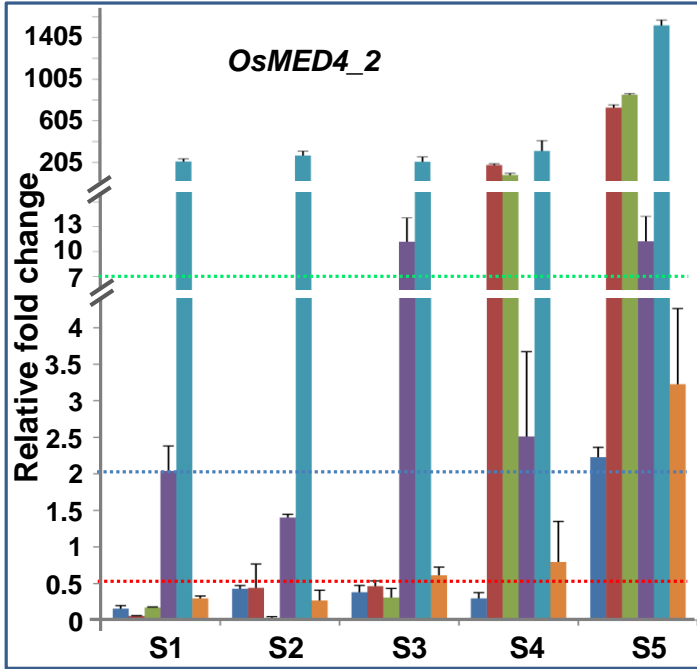

**Figure S3:** Graphs showing fold changes in seed w.r.t. flag leaf in selected *MED* genes calculated by  $2^{-\Delta\Delta C_t}$  method. Graph bars above/below dotted lines represent  $\geq 2$  fold upregulation (above blue dotted lines),  $\geq 2$  fold downregulation (below red dotted lines) and  $\geq 7$  fold upregulation (above green dotted lines). Note the change in scale on y-axis after the break in the graphs. The seed development stages (S1-S5) are depicted on the x-axis. QPCR was performed in six accessions of rice, as mentioned in the legend. The SD values for three biological replicates have been plotted in the bars.

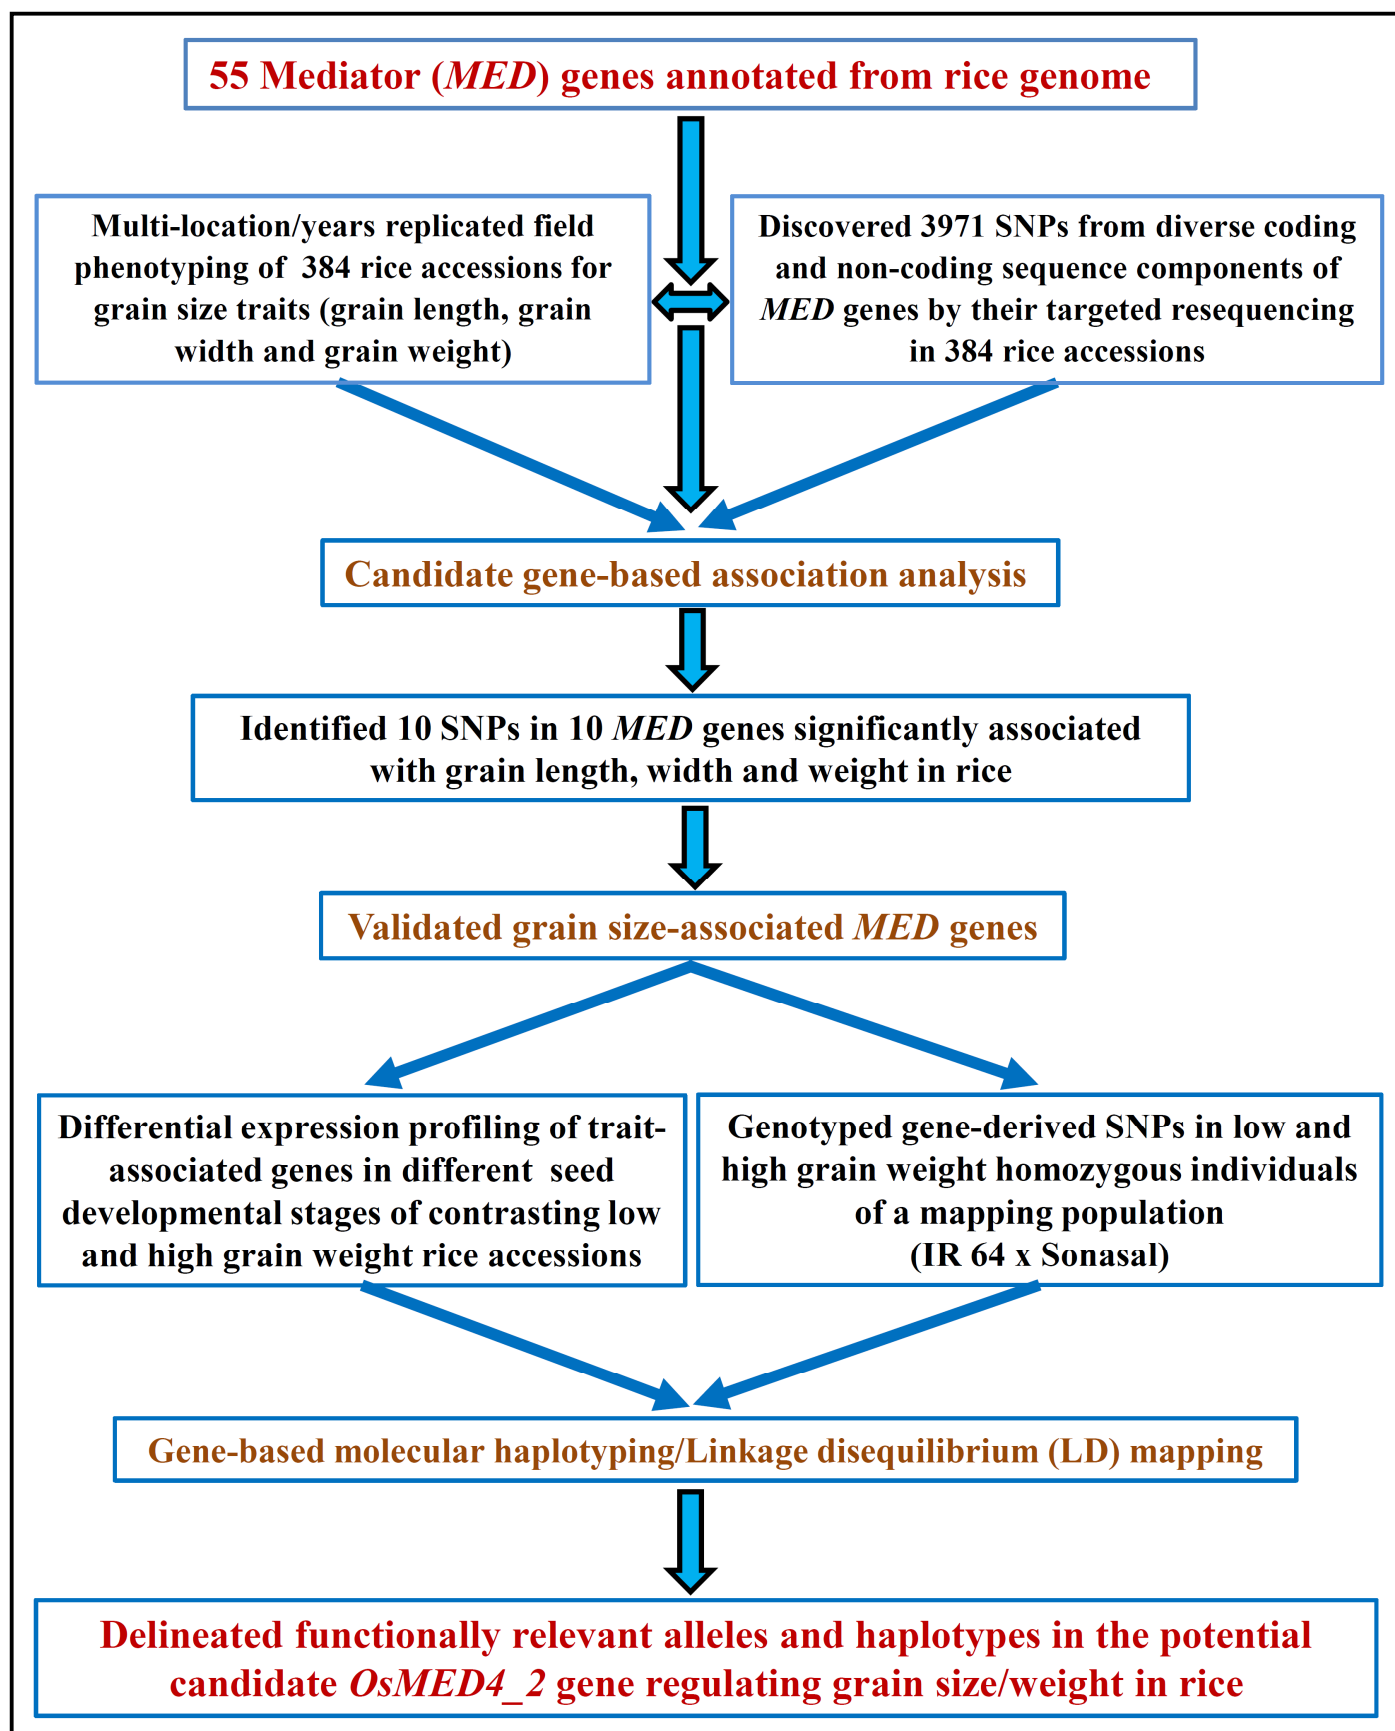

**Figure S4.** An integrated genomic approach (trait association analysis and mapping population validation, differential expression profiling, molecular haplotyping and SNP haplotype-specific association analysis/LD mapping) to delineate the potential molecular tags in a candidate *MED* gene regulating grain weight/size in rice.

**Table S1.** Structural and functional annotation of 3971 SNPs mined from the 55 Mediator genes of rice

| Mediator genes  | MSU locus ID   | Chromosomes | Physical Position (bp) | SNPs  | Structural Annotation |
|-----------------|----------------|-------------|------------------------|-------|-----------------------|
| <i>OsMed2_1</i> | LOC_Os10g40060 | Os_chr10    | 21387939               | [A/G] | INTRON                |
| <i>OsMed2_1</i> | LOC_Os10g40060 | Os_chr10    | 21387849               | [A/G] | INTRON                |
| <i>OsMed2_1</i> | LOC_Os10g40060 | Os_chr10    | 21387565               | [G/A] | INTRON                |
| <i>OsMed2_1</i> | LOC_Os10g40060 | Os_chr10    | 21388461               | [C/T] | REGULATORY            |
| <i>OsMed2_1</i> | LOC_Os10g40060 | Os_chr10    | 21388445               | [G/T] | REGULATORY            |
| <i>OsMed2_1</i> | LOC_Os10g40060 | Os_chr10    | 21388400               | [A/G] | REGULATORY            |
| <i>OsMed2_1</i> | LOC_Os10g40060 | Os_chr10    | 21388371               | [A/T] | REGULATORY            |
| <i>OsMed2_1</i> | LOC_Os10g40060 | Os_chr10    | 21388323               | [C/A] | REGULATORY            |
| <i>OsMed2_1</i> | LOC_Os10g40070 | Os_chr10    | 21388970               | [T/C] | SYNONYMOUS-CODING     |
| <i>OsCdk8_1</i> | LOC_Os10g42950 | Os_chr10    | 23080890               | [A/T] | INTRON                |
| <i>OsCdk8_1</i> | LOC_Os10g42950 | Os_chr10    | 23080752               | [G/A] | INTRON                |
| <i>OsCdk8_1</i> | LOC_Os10g42950 | Os_chr10    | 23080416               | [G/A] | INTRON                |
| <i>OsCdk8_1</i> | LOC_Os10g42950 | Os_chr10    | 23079089               | [A/G] | INTRON                |
| <i>OsCdk8_1</i> | LOC_Os10g42950 | Os_chr10    | 23078576               | [C/A] | INTRON                |
| <i>OsCdk8_1</i> | LOC_Os10g42950 | Os_chr10    | 23078043               | [C/T] | INTRON                |
| <i>OsCdk8_1</i> | LOC_Os10g42950 | Os_chr10    | 23077940               | [C/A] | INTRON                |
| <i>OsCdk8_1</i> | LOC_Os10g42950 | Os_chr10    | 23079876               | [G/A] | INTRON                |
| <i>OsCdk8_1</i> | LOC_Os10g42950 | Os_chr10    | 23081729               | [G/A] | REGULATORY            |
| <i>OsCdk8_1</i> | LOC_Os10g42950 | Os_chr10    | 23077501               | [T/C] | REGULATORY            |
| <i>OsCdk8_1</i> | LOC_Os10g42950 | Os_chr10    | 23077448               | [C/T] | REGULATORY            |
| <i>OsCdk8_1</i> | LOC_Os10g42950 | Os_chr10    | 23077428               | [A/C] | REGULATORY            |
| <i>OsCdk8_1</i> | LOC_Os10g42950 | Os_chr10    | 23077379               | [C/T] | REGULATORY            |
| <i>OsCdk8_1</i> | LOC_Os10g42950 | Os_chr10    | 23082694               | [G/A] | REGULATORY            |
| <i>OsCdk8_1</i> | LOC_Os10g42950 | Os_chr10    | 23082624               | [A/G] | REGULATORY            |
| <i>OsCdk8_1</i> | LOC_Os10g42950 | Os_chr10    | 23082609               | [T/A] | REGULATORY            |
| <i>OsCdk8_1</i> | LOC_Os10g42950 | Os_chr10    | 23082601               | [G/T] | REGULATORY            |
| <i>OsCdk8_1</i> | LOC_Os10g42950 | Os_chr10    | 23082584               | [A/G] | REGULATORY            |
| <i>OsCdk8_1</i> | LOC_Os10g42950 | Os_chr10    | 23082506               | [C/T] | REGULATORY            |
| <i>OsCdk8_1</i> | LOC_Os10g42950 | Os_chr10    | 23082491               | [T/C] | REGULATORY            |
| <i>OsCdk8_1</i> | LOC_Os10g42950 | Os_chr10    | 23082474               | [C/G] | REGULATORY            |
| <i>OsCdk8_1</i> | LOC_Os10g42950 | Os_chr10    | 23082457               | [T/C] | REGULATORY            |
| <i>OsCdk8_1</i> | LOC_Os10g42950 | Os_chr10    | 23082426               | [C/T] | REGULATORY            |
| <i>OsCdk8_1</i> | LOC_Os10g42950 | Os_chr10    | 23082301               | [T/C] | REGULATORY            |
| <i>OsCdk8_1</i> | LOC_Os10g42950 | Os_chr10    | 23082186               | [C/T] | REGULATORY            |
| <i>OsCdk8_1</i> | LOC_Os10g42950 | Os_chr10    | 23082161               | [A/T] | REGULATORY            |
| <i>OsCdk8_1</i> | LOC_Os10g42950 | Os_chr10    | 23082114               | [G/A] | REGULATORY            |
| <i>OsCdk8_1</i> | LOC_Os10g42950 | Os_chr10    | 23082059               | [G/A] | REGULATORY            |
| <i>OsCdk8_1</i> | LOC_Os10g42950 | Os_chr10    | 23081982               | [G/A] | REGULATORY            |
| <i>OsCdk8_1</i> | LOC_Os10g42950 | Os_chr10    | 23081980               | [T/C] | REGULATORY            |
| <i>OsCdk8_1</i> | LOC_Os10g42950 | Os_chr10    | 23081819               | [A/G] | REGULATORY            |
| <i>OsCdk8_1</i> | LOC_Os10g42950 | Os_chr10    | 23079675               | [C/T] | SYNONYMOUS-CODING     |
| <i>OsCdk8_1</i> | LOC_Os10g42950 | Os_chr10    | 23079512               | [G/A] | SYNONYMOUS-CODING     |
| <i>OsCycC_1</i> | LOC_Os09g32680 | Os_chr09    | 19502176               | [G/A] | INTRON                |
| <i>OsCycC_1</i> | LOC_Os09g32680 | Os_chr09    | 19501982               | [C/T] | INTRON                |
| <i>OsCycC_1</i> | LOC_Os09g32680 | Os_chr09    | 19501753               | [T/C] | INTRON                |
| <i>OsCycC_1</i> | LOC_Os09g32680 | Os_chr09    | 19501717               | [A/C] | INTRON                |

| Mediator genes  | MSU locus ID   | Chromosomes | Physical Position (bp) | SNPs  | Structural Annotation |
|-----------------|----------------|-------------|------------------------|-------|-----------------------|
| <i>OsCycC_1</i> | LOC_Os09g32680 | Os_chr09    | 19501705               | [G/A] | INTRON                |
| <i>OsCycC_1</i> | LOC_Os09g32680 | Os_chr09    | 19501621               | [A/G] | INTRON                |
| <i>OsCycC_1</i> | LOC_Os09g32680 | Os_chr09    | 19501434               | [A/G] | INTRON                |
| <i>OsCycC_1</i> | LOC_Os09g32680 | Os_chr09    | 19501278               | [A/C] | INTRON                |
| <i>OsCycC_1</i> | LOC_Os09g32680 | Os_chr09    | 19501260               | [C/T] | INTRON                |
| <i>OsCycC_1</i> | LOC_Os09g32680 | Os_chr09    | 19501249               | [T/C] | INTRON                |
| <i>OsCycC_1</i> | LOC_Os09g32680 | Os_chr09    | 19501014               | [C/A] | INTRON                |
| <i>OsCycC_1</i> | LOC_Os09g32680 | Os_chr09    | 19501006               | [A/G] | INTRON                |
| <i>OsCycC_1</i> | LOC_Os09g32680 | Os_chr09    | 19500945               | [A/T] | INTRON                |
| <i>OsCycC_1</i> | LOC_Os09g32680 | Os_chr09    | 19500844               | [A/T] | INTRON                |
| <i>OsCycC_1</i> | LOC_Os09g32680 | Os_chr09    | 19500826               | [A/G] | INTRON                |
| <i>OsCycC_1</i> | LOC_Os09g32680 | Os_chr09    | 19500783               | [C/T] | INTRON                |
| <i>OsCycC_1</i> | LOC_Os09g32680 | Os_chr09    | 19500671               | [A/T] | INTRON                |
| <i>OsCycC_1</i> | LOC_Os09g32680 | Os_chr09    | 19500312               | [G/T] | INTRON                |
| <i>OsCycC_1</i> | LOC_Os09g32680 | Os_chr09    | 19500298               | [G/A] | INTRON                |
| <i>OsCycC_1</i> | LOC_Os09g32680 | Os_chr09    | 19500286               | [T/C] | INTRON                |
| <i>OsCycC_1</i> | LOC_Os09g32680 | Os_chr09    | 19500283               | [T/G] | INTRON                |
| <i>OsCycC_1</i> | LOC_Os09g32680 | Os_chr09    | 19500255               | [A/G] | INTRON                |
| <i>OsCycC_1</i> | LOC_Os09g32680 | Os_chr09    | 19500144               | [A/T] | INTRON                |
| <i>OsCycC_1</i> | LOC_Os09g32680 | Os_chr09    | 19500018               | [A/G] | INTRON                |
| <i>OsCycC_1</i> | LOC_Os09g32680 | Os_chr09    | 19499783               | [T/C] | INTRON                |
| <i>OsCycC_1</i> | LOC_Os09g32680 | Os_chr09    | 19499760               | [T/C] | INTRON                |
| <i>OsCycC_1</i> | LOC_Os09g32680 | Os_chr09    | 19499607               | [G/A] | INTRON                |
| <i>OsCycC_1</i> | LOC_Os09g32680 | Os_chr09    | 19499428               | [C/G] | INTRON                |
| <i>OsCycC_1</i> | LOC_Os09g32680 | Os_chr09    | 19499215               | [A/T] | INTRON                |
| <i>OsCycC_1</i> | LOC_Os09g32680 | Os_chr09    | 19499172               | [A/G] | INTRON                |
| <i>OsCycC_1</i> | LOC_Os09g32680 | Os_chr09    | 19499071               | [T/C] | INTRON                |
| <i>OsCycC_1</i> | LOC_Os09g32680 | Os_chr09    | 19498894               | [C/T] | INTRON                |
| <i>OsCycC_1</i> | LOC_Os09g32680 | Os_chr09    | 19498845               | [G/A] | INTRON                |
| <i>OsCycC_1</i> | LOC_Os09g32680 | Os_chr09    | 19502717               | [A/G] | REGULATORY            |
| <i>OsCycC_1</i> | LOC_Os09g32680 | Os_chr09    | 19502704               | [G/C] | REGULATORY            |
| <i>OsCycC_1</i> | LOC_Os09g32680 | Os_chr09    | 19502605               | [C/T] | REGULATORY            |
| <i>OsCycC_1</i> | LOC_Os09g32680 | Os_chr09    | 19502478               | [A/T] | REGULATORY            |
| <i>OsCycC_1</i> | LOC_Os09g32680 | Os_chr09    | 19502434               | [A/G] | REGULATORY            |
| <i>OsCycC_1</i> | LOC_Os09g32680 | Os_chr09    | 19498283               | [G/A] | REGULATORY            |
| <i>OsCycC_1</i> | LOC_Os09g32680 | Os_chr09    | 19498263               | [G/T] | REGULATORY            |
| <i>OsCycC_1</i> | LOC_Os09g32680 | Os_chr09    | 19498261               | [C/T] | REGULATORY            |
| <i>OsCycC_1</i> | LOC_Os09g32680 | Os_chr09    | 19498238               | [A/C] | REGULATORY            |
| <i>OsCycC_1</i> | LOC_Os09g32680 | Os_chr09    | 19498227               | [C/A] | REGULATORY            |
| <i>OsCycC_1</i> | LOC_Os09g32680 | Os_chr09    | 19498051               | [T/C] | REGULATORY            |
| <i>OsCycC_1</i> | LOC_Os09g32680 | Os_chr09    | 19497977               | [A/T] | REGULATORY            |
| <i>OsCycC_1</i> | LOC_Os09g32680 | Os_chr09    | 19497928               | [G/A] | REGULATORY            |
| <i>OsCycC_1</i> | LOC_Os09g32680 | Os_chr09    | 19497818               | [A/T] | REGULATORY            |
| <i>OsCycC_1</i> | LOC_Os09g32680 | Os_chr09    | 19497697               | [A/G] | REGULATORY            |
| <i>OsCycC_1</i> | LOC_Os09g32680 | Os_chr09    | 19497664               | [A/G] | REGULATORY            |
| <i>OsCycC_1</i> | LOC_Os09g32680 | Os_chr09    | 19497598               | [G/A] | REGULATORY            |
| <i>OsCycC_1</i> | LOC_Os09g32680 | Os_chr09    | 19502062               | [A/T] | SYNONYMOUS-CODING     |



| Mediator genes   | MSU locus ID   | Chromosomes | Physical Position (bp) | SNPs  | Structural Annotation |
|------------------|----------------|-------------|------------------------|-------|-----------------------|
| <i>OsCycC_1</i>  | LOC_Os09g32680 | Os_chr09    | 19501136               | [A/C] | SYNONYMOUS-CODING     |
| <i>OsMed10_1</i> | LOC_Os09g35920 | Os_chr09    | 20677468               | [G/C] | INTRON                |
| <i>OsMed10_1</i> | LOC_Os09g35920 | Os_chr09    | 20677223               | [A/G] | INTRON                |
| <i>OsMed10_1</i> | LOC_Os09g35920 | Os_chr09    | 20676655               | [C/T] | INTRON                |
| <i>OsMed10_1</i> | LOC_Os09g35920 | Os_chr09    | 20676536               | [T/A] | INTRON                |
| <i>OsMed10_1</i> | LOC_Os09g35920 | Os_chr09    | 20676375               | [T/C] | INTRON                |
| <i>OsMed10_1</i> | LOC_Os09g35920 | Os_chr09    | 20676302               | [C/A] | INTRON                |
| <i>OsMed10_1</i> | LOC_Os09g35920 | Os_chr09    | 20676240               | [C/T] | NON-SYNONYMOUS-CODING |
| <i>OsMed10_1</i> | LOC_Os09g35920 | Os_chr09    | 20675815               | [C/A] | REGULATORY            |
| <i>OsMed10_1</i> | LOC_Os09g35920 | Os_chr09    | 20675607               | [C/T] | REGULATORY            |
| <i>OsMed10_1</i> | LOC_Os09g35920 | Os_chr09    | 20675399               | [C/T] | REGULATORY            |
| <i>OsMed10_1</i> | LOC_Os09g35920 | Os_chr09    | 20675216               | [G/T] | REGULATORY            |
| <i>OsMed10_1</i> | LOC_Os09g35920 | Os_chr09    | 20675155               | [T/C] | REGULATORY            |
| <i>OsMed10_1</i> | LOC_Os09g35920 | Os_chr09    | 20674697               | [A/G] | REGULATORY            |
| <i>OsMed10_1</i> | LOC_Os09g35920 | Os_chr09    | 20674319               | [T/C] | REGULATORY            |
| <i>OsMed10_1</i> | LOC_Os09g35920 | Os_chr09    | 20679151               | [A/G] | REGULATORY            |
| <i>OsMed10_1</i> | LOC_Os09g35920 | Os_chr09    | 20678967               | [C/T] | REGULATORY            |
| <i>OsMed10_1</i> | LOC_Os09g35920 | Os_chr09    | 20678773               | [G/A] | REGULATORY            |
| <i>OsMed10_1</i> | LOC_Os09g35920 | Os_chr09    | 20678648               | [G/A] | REGULATORY            |
| <i>OsMed10_1</i> | LOC_Os09g35920 | Os_chr09    | 20678640               | [G/T] | REGULATORY            |
| <i>OsMed10_1</i> | LOC_Os09g35920 | Os_chr09    | 20678565               | [T/C] | REGULATORY            |
| <i>OsMed10_1</i> | LOC_Os09g35920 | Os_chr09    | 20678485               | [C/T] | REGULATORY            |
| <i>OsMed10_1</i> | LOC_Os09g35920 | Os_chr09    | 20678383               | [A/G] | REGULATORY            |
| <i>OsMed10_1</i> | LOC_Os09g35920 | Os_chr09    | 20678359               | [T/C] | REGULATORY            |
| <i>OsMed10_1</i> | LOC_Os09g35920 | Os_chr09    | 20678262               | [T/C] | REGULATORY            |
| <i>OsMed10_1</i> | LOC_Os09g35920 | Os_chr09    | 20678057               | [T/C] | SYNONYMOUS-CODING     |
| <i>OsMed10_1</i> | LOC_Os09g35920 | Os_chr09    | 20677964               | [G/T] | SYNONYMOUS-CODING     |
| <i>OsMed10_1</i> | LOC_Os09g35920 | Os_chr09    | 20677509               | [C/T] | SYNONYMOUS-CODING     |
| <i>OsMed11_1</i> | LOC_Os02g09600 | Os_chr02    | 4941639                | [A/G] | INTRON                |
| <i>OsMed11_1</i> | LOC_Os02g09600 | Os_chr02    | 4941622                | [G/T] | INTRON                |
| <i>OsMed11_1</i> | LOC_Os02g09600 | Os_chr02    | 4941523                | [A/G] | INTRON                |
| <i>OsMed11_1</i> | LOC_Os02g09600 | Os_chr02    | 4941457                | [C/A] | INTRON                |
| <i>OsMed11_1</i> | LOC_Os02g09600 | Os_chr02    | 4941364                | [A/G] | INTRON                |
| <i>OsMed11_1</i> | LOC_Os02g09600 | Os_chr02    | 4941102                | [T/C] | INTRON                |
| <i>OsMed11_1</i> | LOC_Os02g09600 | Os_chr02    | 4941078                | [T/A] | INTRON                |
| <i>OsMed11_1</i> | LOC_Os02g09600 | Os_chr02    | 4941013                | [G/A] | INTRON                |
| <i>OsMed11_1</i> | LOC_Os02g09600 | Os_chr02    | 4940847                | [G/A] | INTRON                |
| <i>OsMed11_1</i> | LOC_Os02g09600 | Os_chr02    | 4940787                | [C/A] | INTRON                |
| <i>OsMed11_1</i> | LOC_Os02g09600 | Os_chr02    | 4940777                | [G/C] | INTRON                |
| <i>OsMed11_1</i> | LOC_Os02g09600 | Os_chr02    | 4940706                | [C/T] | INTRON                |
| <i>OsMed11_1</i> | LOC_Os02g09600 | Os_chr02    | 4940694                | [G/A] | INTRON                |
| <i>OsMed11_1</i> | LOC_Os02g09600 | Os_chr02    | 4940677                | [A/G] | INTRON                |
| <i>OsMed11_1</i> | LOC_Os02g09600 | Os_chr02    | 4940668                | [C/T] | INTRON                |
| <i>OsMed11_1</i> | LOC_Os02g09600 | Os_chr02    | 4940266                | [G/T] | INTRON                |
| <i>OsMed11_1</i> | LOC_Os02g09600 | Os_chr02    | 4940217                | [A/T] | INTRON                |
| <i>OsMed11_1</i> | LOC_Os02g09600 | Os_chr02    | 4939950                | [T/C] | INTRON                |
| <i>OsMed11_1</i> | LOC_Os02g09600 | Os_chr02    | 4939929                | [A/G] | INTRON                |

| Mediator genes   | MSU locus ID   | Chromosomes | Physical Position (bp) | SNPs  | Structural Annotation |
|------------------|----------------|-------------|------------------------|-------|-----------------------|
| <i>OsMed11_1</i> | LOC_Os02g09600 | Os_chr02    | 4939814                | [G/A] | INTRON                |
| <i>OsMed11_1</i> | LOC_Os02g09600 | Os_chr02    | 4939781                | [C/G] | INTRON                |
| <i>OsMed11_1</i> | LOC_Os02g09600 | Os_chr02    | 4939741                | [T/A] | INTRON                |
| <i>OsMed11_1</i> | LOC_Os02g09600 | Os_chr02    | 4939662                | [C/A] | INTRON                |
| <i>OsMed11_1</i> | LOC_Os02g09600 | Os_chr02    | 4939438                | [G/A] | INTRON                |
| <i>OsMed11_1</i> | LOC_Os02g09600 | Os_chr02    | 4939348                | [C/T] | INTRON                |
| <i>OsMed11_1</i> | LOC_Os02g09600 | Os_chr02    | 4939320                | [C/T] | INTRON                |
| <i>OsMed11_1</i> | LOC_Os02g09600 | Os_chr02    | 4940189                | [G/A] | NON-SYNONYMOUS-CODING |
| <i>OsMed11_1</i> | LOC_Os02g09610 | Os_chr02    | 4943009                | [G/A] | NON-SYNONYMOUS-CODING |
| <i>OsMed11_1</i> | LOC_Os02g09610 | Os_chr02    | 4942995                | [C/T] | NON-SYNONYMOUS-CODING |
| <i>OsMed11_1</i> | LOC_Os02g09610 | Os_chr02    | 4942802                | [G/A] | NON-SYNONYMOUS-CODING |
| <i>OsMed11_1</i> | LOC_Os02g09610 | Os_chr02    | 4942779                | [C/T] | NON-SYNONYMOUS-CODING |
| <i>OsMed11_1</i> | LOC_Os02g09600 | Os_chr02    | 4942000                | [G/T] | REGULATORY            |
| <i>OsMed11_1</i> | LOC_Os02g09600 | Os_chr02    | 4941959                | [G/A] | REGULATORY            |
| <i>OsMed11_1</i> | LOC_Os02g09600 | Os_chr02    | 4939023                | [G/A] | REGULATORY            |
| <i>OsMed11_1</i> | LOC_Os02g09600 | Os_chr02    | 4938902                | [C/A] | REGULATORY            |
| <i>OsMed11_1</i> | LOC_Os02g09600 | Os_chr02    | 4938781                | [A/G] | REGULATORY            |
| <i>OsMed11_1</i> | LOC_Os02g57590 | Os_chr02    | 4942531                | [A/G] | REGULATORY            |
| <i>OsMed11_1</i> | LOC_Os02g57590 | Os_chr02    | 4942458                | [A/G] | REGULATORY            |
| <i>OsMed11_1</i> | LOC_Os02g57590 | Os_chr02    | 4942433                | [A/T] | REGULATORY            |
| <i>OsMed11_1</i> | LOC_Os02g57590 | Os_chr02    | 4942342                | [T/C] | REGULATORY            |
| <i>OsMed11_1</i> | LOC_Os02g57590 | Os_chr02    | 4942296                | [T/A] | REGULATORY            |
| <i>OsMed11_1</i> | LOC_Os02g57590 | Os_chr02    | 4942157                | [A/C] | REGULATORY            |
| <i>OsMed11_1</i> | LOC_Os02g57590 | Os_chr02    | 4942095                | [T/C] | REGULATORY            |
| <i>OsMed11_1</i> | LOC_Os02g09600 | Os_chr02    | 4941708                | [A/G] | SYNONYMOUS-CODING     |
| <i>OsMed11_1</i> | LOC_Os02g09600 | Os_chr02    | 4940158                | [G/A] | SYNONYMOUS-CODING     |
| <i>OsMed11_2</i> | LOC_Os02g49640 | Os_chr02    | 30333694               | [C/T] | INTRON                |
| <i>OsMed11_2</i> | LOC_Os02g49640 | Os_chr02    | 30333593               | [G/A] | INTRON                |
| <i>OsMed11_2</i> | LOC_Os02g49640 | Os_chr02    | 30333294               | [C/A] | INTRON                |
| <i>OsMed11_2</i> | LOC_Os02g49640 | Os_chr02    | 30333183               | [G/T] | INTRON                |
| <i>OsMed11_2</i> | LOC_Os02g49640 | Os_chr02    | 30333102               | [C/T] | INTRON                |
| <i>OsMed11_2</i> | LOC_Os02g49640 | Os_chr02    | 30333069               | [C/A] | INTRON                |
| <i>OsMed11_2</i> | LOC_Os02g49640 | Os_chr02    | 30332737               | [T/C] | INTRON                |
| <i>OsMed11_2</i> | LOC_Os02g49640 | Os_chr02    | 30332631               | [T/C] | INTRON                |
| <i>OsMed11_2</i> | LOC_Os02g49640 | Os_chr02    | 30332594               | [C/T] | INTRON                |
| <i>OsMed11_2</i> | LOC_Os02g49640 | Os_chr02    | 30332470               | [C/T] | INTRON                |
| <i>OsMed11_2</i> | LOC_Os02g49640 | Os_chr02    | 30332377               | [A/T] | INTRON                |
| <i>OsMed11_2</i> | LOC_Os02g49640 | Os_chr02    | 30332190               | [C/T] | INTRON                |
| <i>OsMed11_2</i> | LOC_Os02g49640 | Os_chr02    | 30332028               | [T/C] | INTRON                |
| <i>OsMed11_2</i> | LOC_Os02g49640 | Os_chr02    | 30331886               | [A/G] | INTRON                |
| <i>OsMed11_2</i> | LOC_Os02g49640 | Os_chr02    | 30331885               | [G/T] | INTRON                |
| <i>OsMed11_2</i> | LOC_Os02g49640 | Os_chr02    | 30331573               | [G/A] | INTRON                |
| <i>OsMed11_2</i> | LOC_Os02g49640 | Os_chr02    | 30331522               | [T/C] | INTRON                |
| <i>OsMed11_2</i> | LOC_Os02g49640 | Os_chr02    | 30331511               | [C/T] | INTRON                |
| <i>OsMed11_2</i> | LOC_Os02g49640 | Os_chr02    | 30331163               | [G/A] | INTRON                |
| <i>OsMed11_2</i> | LOC_Os02g49640 | Os_chr02    | 30331156               | [G/A] | INTRON                |
| <i>OsMed11_2</i> | LOC_Os02g49640 | Os_chr02    | 30331123               | [C/T] | INTRON                |

| Mediator genes   | MSU locus ID   | Chromosomes | Physical Position (bp) | SNPs  | Structural Annotation |
|------------------|----------------|-------------|------------------------|-------|-----------------------|
| <i>OsMed11_2</i> | LOC_Os02g49640 | Os_chr02    | 30331119               | [G/A] | INTRON                |
| <i>OsMed11_2</i> | LOC_Os02g49640 | Os_chr02    | 30331004               | [T/C] | INTRON                |
| <i>OsMed11_2</i> | LOC_Os02g49640 | Os_chr02    | 30330964               | [T/C] | INTRON                |
| <i>OsMed11_2</i> | LOC_Os02g49640 | Os_chr02    | 30330914               | [C/T] | INTRON                |
| <i>OsMed11_2</i> | LOC_Os02g49640 | Os_chr02    | 30330882               | [T/C] | INTRON                |
| <i>OsMed11_2</i> | LOC_Os02g49640 | Os_chr02    | 30330815               | [C/T] | INTRON                |
| <i>OsMed11_2</i> | LOC_Os02g49640 | Os_chr02    | 30330771               | [C/T] | INTRON                |
| <i>OsMed11_2</i> | LOC_Os02g49640 | Os_chr02    | 30330750               | [C/T] | INTRON                |
| <i>OsMed11_2</i> | LOC_Os02g49640 | Os_chr02    | 30330687               | [A/G] | INTRON                |
| <i>OsMed11_2</i> | LOC_Os02g49640 | Os_chr02    | 30330658               | [T/C] | INTRON                |
| <i>OsMed11_2</i> | LOC_Os02g49640 | Os_chr02    | 30330593               | [A/T] | INTRON                |
| <i>OsMed11_2</i> | LOC_Os02g49640 | Os_chr02    | 30330592               | [C/A] | INTRON                |
| <i>OsMed11_2</i> | LOC_Os02g49640 | Os_chr02    | 30331703               | [G/A] | NON-SYNONYMOUS-CODING |
| <i>OsMed11_2</i> | LOC_Os02g49640 | Os_chr02    | 30331464               | [A/G] | NON-SYNONYMOUS-CODING |
| <i>OsMed11_2</i> | LOC_Os02g49640 | Os_chr02    | 30331420               | [G/A] | REGULATORY            |
| <i>OsMed11_2</i> | LOC_Os02g49640 | Os_chr02    | 30331399               | [C/T] | REGULATORY            |
| <i>OsMed11_2</i> | LOC_Os02g49640 | Os_chr02    | 30330562               | [T/G] | REGULATORY            |
| <i>OsMed11_2</i> | LOC_Os02g49640 | Os_chr02    | 30330551               | [C/T] | REGULATORY            |
| <i>OsMed11_2</i> | LOC_Os02g49640 | Os_chr02    | 30330502               | [C/G] | REGULATORY            |
| <i>OsMed11_2</i> | LOC_Os02g49640 | Os_chr02    | 30331650               | [A/C] | REGULATORY            |
| <i>OsMed11_2</i> | LOC_Os02g49640 | Os_chr02    | 30333986               | [C/A] | REGULATORY            |
| <i>OsMed11_2</i> | LOC_Os02g49640 | Os_chr02    | 30333958               | [G/C] | REGULATORY            |
| <i>OsMed11_2</i> | LOC_Os02g49640 | Os_chr02    | 30333908               | [G/T] | REGULATORY            |
| <i>OsMed11_2</i> | LOC_Os02g49640 | Os_chr02    | 30333859               | [A/G] | REGULATORY            |
| <i>OsMed11_2</i> | LOC_Os02g57590 | Os_chr02    | 30330450               | [C/T] | REGULATORY            |
| <i>OsMed11_2</i> | LOC_Os02g57590 | Os_chr02    | 30330424               | [C/A] | REGULATORY            |
| <i>OsMed11_2</i> | LOC_Os02g57590 | Os_chr02    | 30330396               | [C/G] | REGULATORY            |
| <i>OsMed11_2</i> | LOC_Os02g57590 | Os_chr02    | 30330298               | [G/A] | REGULATORY            |
| <i>OsMed11_2</i> | LOC_Os02g57590 | Os_chr02    | 30330292               | [G/A] | REGULATORY            |
| <i>OsMed11_2</i> | LOC_Os02g57590 | Os_chr02    | 30330122               | [G/A] | REGULATORY            |
| <i>OsMed11_2</i> | LOC_Os02g57590 | Os_chr02    | 30330069               | [T/C] | REGULATORY            |
| <i>OsMed11_2</i> | LOC_Os02g57590 | Os_chr02    | 30329851               | [A/G] | REGULATORY            |
| <i>OsMed11_2</i> | LOC_Os02g57590 | Os_chr02    | 30329822               | [A/G] | REGULATORY            |
| <i>OsMed11_2</i> | LOC_Os02g57590 | Os_chr02    | 30329808               | [C/G] | REGULATORY            |
| <i>OsMed11_2</i> | LOC_Os02g57590 | Os_chr02    | 30329666               | [G/A] | REGULATORY            |
| <i>OsMed11_2</i> | LOC_Os02g57590 | Os_chr02    | 30329597               | [C/T] | REGULATORY            |
| <i>OsMed11_2</i> | LOC_Os02g57590 | Os_chr02    | 30329560               | [A/T] | REGULATORY            |
| <i>OsMed11_2</i> | LOC_Os02g49640 | Os_chr02    | 30331651               | [T/G] | SYNONYMOUS-CODING     |
| <i>OsMed12_1</i> | LOC_Os07g45400 | Os_chr07    | 27081531               | [G/A] | INTRON                |
| <i>OsMed12_1</i> | LOC_Os07g45400 | Os_chr07    | 27081505               | [G/A] | INTRON                |
| <i>OsMed12_1</i> | LOC_Os07g45400 | Os_chr07    | 27081490               | [T/A] | INTRON                |
| <i>OsMed12_1</i> | LOC_Os07g45400 | Os_chr07    | 27080907               | [C/A] | INTRON                |
| <i>OsMed12_1</i> | LOC_Os07g45400 | Os_chr07    | 27078851               | [A/T] | INTRON                |
| <i>OsMed12_1</i> | LOC_Os07g45400 | Os_chr07    | 27078030               | [C/T] | INTRON                |
| <i>OsMed12_1</i> | LOC_Os07g45400 | Os_chr07    | 27077882               | [C/T] | INTRON                |
| <i>OsMed12_1</i> | LOC_Os07g45400 | Os_chr07    | 27077287               | [C/T] | INTRON                |
| <i>OsMed12_1</i> | LOC_Os07g45400 | Os_chr07    | 27077271               | [A/G] | INTRON                |

| Mediator genes   | MSU locus ID   | Chromosomes | Physical Position (bp) | SNPs  | Structural Annotation |
|------------------|----------------|-------------|------------------------|-------|-----------------------|
| <i>OsMed12_1</i> | LOC_Os07g45400 | Os_chr07    | 27074539               | [C/T] | INTRON                |
| <i>OsMed12_1</i> | LOC_Os07g45400 | Os_chr07    | 27074506               | [A/G] | INTRON                |
| <i>OsMed12_1</i> | LOC_Os07g45400 | Os_chr07    | 27074144               | [C/T] | INTRON                |
| <i>OsMed12_1</i> | LOC_Os07g45400 | Os_chr07    | 27073951               | [G/T] | INTRON                |
| <i>OsMed12_1</i> | LOC_Os07g45400 | Os_chr07    | 27073653               | [T/A] | INTRON                |
| <i>OsMed12_1</i> | LOC_Os07g45400 | Os_chr07    | 27073214               | [A/G] | INTRON                |
| <i>OsMed12_1</i> | LOC_Os07g45400 | Os_chr07    | 27073189               | [A/T] | INTRON                |
| <i>OsMed12_1</i> | LOC_Os07g45400 | Os_chr07    | 27073027               | [A/G] | INTRON                |
| <i>OsMed12_1</i> | LOC_Os07g45400 | Os_chr07    | 27072548               | [T/G] | INTRON                |
| <i>OsMed12_1</i> | LOC_Os07g45400 | Os_chr07    | 27072425               | [C/T] | INTRON                |
| <i>OsMed12_1</i> | LOC_Os07g45400 | Os_chr07    | 27072198               | [T/A] | INTRON                |
| <i>OsMed12_1</i> | LOC_Os07g45400 | Os_chr07    | 27072168               | [G/A] | INTRON                |
| <i>OsMed12_1</i> | LOC_Os07g45400 | Os_chr07    | 27072109               | [G/T] | INTRON                |
| <i>OsMed12_1</i> | LOC_Os07g45400 | Os_chr07    | 27072059               | [C/T] | INTRON                |
| <i>OsMed12_1</i> | LOC_Os07g45400 | Os_chr07    | 27071898               | [A/G] | INTRON                |
| <i>OsMed12_1</i> | LOC_Os07g45400 | Os_chr07    | 27071813               | [G/A] | INTRON                |
| <i>OsMed12_1</i> | LOC_Os07g45400 | Os_chr07    | 27071774               | [A/T] | INTRON                |
| <i>OsMed12_1</i> | LOC_Os07g45400 | Os_chr07    | 27071702               | [A/G] | INTRON                |
| <i>OsMed12_1</i> | LOC_Os07g45400 | Os_chr07    | 27071693               | [G/A] | INTRON                |
| <i>OsMed12_1</i> | LOC_Os07g45400 | Os_chr07    | 27071672               | [G/A] | INTRON                |
| <i>OsMed12_1</i> | LOC_Os07g45400 | Os_chr07    | 27071559               | [T/G] | INTRON                |
| <i>OsMed12_1</i> | LOC_Os07g45400 | Os_chr07    | 27071375               | [C/A] | INTRON                |
| <i>OsMed12_1</i> | LOC_Os07g45400 | Os_chr07    | 27071350               | [T/C] | INTRON                |
| <i>OsMed12_1</i> | LOC_Os07g45400 | Os_chr07    | 27071299               | [G/A] | INTRON                |
| <i>OsMed12_1</i> | LOC_Os07g45400 | Os_chr07    | 27071297               | [G/A] | INTRON                |
| <i>OsMed12_1</i> | LOC_Os07g45400 | Os_chr07    | 27071290               | [T/C] | INTRON                |
| <i>OsMed12_1</i> | LOC_Os07g45400 | Os_chr07    | 27071227               | [G/A] | INTRON                |
| <i>OsMed12_1</i> | LOC_Os07g45400 | Os_chr07    | 27070664               | [C/T] | INTRON                |
| <i>OsMed12_1</i> | LOC_Os07g45400 | Os_chr07    | 27070485               | [T/G] | INTRON                |
| <i>OsMed12_1</i> | LOC_Os07g45400 | Os_chr07    | 27070419               | [A/C] | INTRON                |
| <i>OsMed12_1</i> | LOC_Os07g45400 | Os_chr07    | 27070403               | [C/T] | INTRON                |
| <i>OsMed12_1</i> | LOC_Os07g45400 | Os_chr07    | 27069987               | [A/G] | INTRON                |
| <i>OsMed12_1</i> | LOC_Os07g45400 | Os_chr07    | 27069878               | [A/T] | INTRON                |
| <i>OsMed12_1</i> | LOC_Os07g45400 | Os_chr07    | 27069873               | [G/T] | INTRON                |
| <i>OsMed12_1</i> | LOC_Os07g45400 | Os_chr07    | 27069868               | [C/T] | INTRON                |
| <i>OsMed12_1</i> | LOC_Os07g45400 | Os_chr07    | 27069821               | [G/A] | INTRON                |
| <i>OsMed12_1</i> | LOC_Os07g45400 | Os_chr07    | 27069800               | [C/T] | INTRON                |
| <i>OsMed12_1</i> | LOC_Os07g45400 | Os_chr07    | 27069740               | [C/T] | INTRON                |
| <i>OsMed12_1</i> | LOC_Os07g45400 | Os_chr07    | 27069608               | [A/G] | INTRON                |
| <i>OsMed12_1</i> | LOC_Os07g45400 | Os_chr07    | 27069606               | [G/A] | INTRON                |
| <i>OsMed12_1</i> | LOC_Os07g45400 | Os_chr07    | 27069549               | [G/A] | INTRON                |
| <i>OsMed12_1</i> | LOC_Os07g45400 | Os_chr07    | 27069461               | [G/A] | INTRON                |
| <i>OsMed12_1</i> | LOC_Os07g45400 | Os_chr07    | 27081817               | [G/A] | NON-SYNONYMOUS-CODING |
| <i>OsMed12_1</i> | LOC_Os07g45400 | Os_chr07    | 27079654               | [G/A] | NON-SYNONYMOUS-CODING |
| <i>OsMed12_1</i> | LOC_Os07g45400 | Os_chr07    | 27079049               | [G/A] | NON-SYNONYMOUS-CODING |
| <i>OsMed12_1</i> | LOC_Os07g45400 | Os_chr07    | 27078941               | [G/T] | NON-SYNONYMOUS-CODING |
| <i>OsMed12_1</i> | LOC_Os07g45400 | Os_chr07    | 27078797               | [G/A] | NON-SYNONYMOUS-CODING |

| Mediator genes   | MSU locus ID   | Chromosomes | Physical Position (bp) | SNPs  | Structural Annotation |
|------------------|----------------|-------------|------------------------|-------|-----------------------|
| <i>OsMed12_1</i> | LOC_Os07g45400 | Os_chr07    | 27078269               | [G/A] | NON-SYNONYMOUS-CODING |
| <i>OsMed12_1</i> | LOC_Os07g45400 | Os_chr07    | 27077085               | [C/G] | NON-SYNONYMOUS-CODING |
| <i>OsMed12_1</i> | LOC_Os07g45400 | Os_chr07    | 27076755               | [A/G] | NON-SYNONYMOUS-CODING |
| <i>OsMed12_1</i> | LOC_Os07g45400 | Os_chr07    | 27076375               | [G/A] | NON-SYNONYMOUS-CODING |
| <i>OsMed12_1</i> | LOC_Os07g45400 | Os_chr07    | 27074921               | [C/G] | NON-SYNONYMOUS-CODING |
| <i>OsMed12_1</i> | LOC_Os07g45400 | Os_chr07    | 27069130               | [G/A] | NON-SYNONYMOUS-CODING |
| <i>OsMed12_1</i> | LOC_Os07g45400 | Os_chr07    | 27069117               | [A/C] | NON-SYNONYMOUS-CODING |
| <i>OsMed12_1</i> | LOC_Os07g45400 | Os_chr07    | 27069064               | [C/T] | NON-SYNONYMOUS-CODING |
| <i>OsMed12_1</i> | LOC_Os07g45400 | Os_chr07    | 27082465               | [A/C] | REGULATORY            |
| <i>OsMed12_1</i> | LOC_Os07g45400 | Os_chr07    | 27082311               | [G/A] | REGULATORY            |
| <i>OsMed12_1</i> | LOC_Os07g45400 | Os_chr07    | 27082136               | [T/G] | REGULATORY            |
| <i>OsMed12_1</i> | LOC_Os07g45400 | Os_chr07    | 27082069               | [C/T] | REGULATORY            |
| <i>OsMed12_1</i> | LOC_Os07g45400 | Os_chr07    | 27082063               | [A/T] | REGULATORY            |
| <i>OsMed12_1</i> | LOC_Os07g45400 | Os_chr07    | 27068947               | [G/A] | REGULATORY            |
| <i>OsMed12_1</i> | LOC_Os07g45400 | Os_chr07    | 27068937               | [G/A] | REGULATORY            |
| <i>OsMed12_1</i> | LOC_Os07g45400 | Os_chr07    | 27068879               | [C/T] | REGULATORY            |
| <i>OsMed12_1</i> | LOC_Os07g45400 | Os_chr07    | 27068868               | [A/G] | REGULATORY            |
| <i>OsMed12_1</i> | LOC_Os07g45400 | Os_chr07    | 27068856               | [G/A] | REGULATORY            |
| <i>OsMed12_1</i> | LOC_Os07g45400 | Os_chr07    | 27068830               | [C/T] | REGULATORY            |
| <i>OsMed12_1</i> | LOC_Os07g45400 | Os_chr07    | 27068806               | [T/C] | REGULATORY            |
| <i>OsMed12_1</i> | LOC_Os07g45400 | Os_chr07    | 27068798               | [G/A] | REGULATORY            |
| <i>OsMed12_1</i> | LOC_Os07g45400 | Os_chr07    | 27068777               | [A/G] | REGULATORY            |
| <i>OsMed12_1</i> | LOC_Os07g45400 | Os_chr07    | 27068771               | [C/A] | REGULATORY            |
| <i>OsMed12_1</i> | LOC_Os07g45400 | Os_chr07    | 27068634               | [A/T] | REGULATORY            |
| <i>OsMed12_1</i> | LOC_Os07g45400 | Os_chr07    | 27068627               | [A/C] | REGULATORY            |
| <i>OsMed12_1</i> | LOC_Os07g45400 | Os_chr07    | 27068532               | [A/G] | REGULATORY            |
| <i>OsMed12_1</i> | LOC_Os07g45400 | Os_chr07    | 27068505               | [T/C] | REGULATORY            |
| <i>OsMed12_1</i> | LOC_Os07g45400 | Os_chr07    | 27068363               | [A/G] | REGULATORY            |
| <i>OsMed12_1</i> | LOC_Os07g45400 | Os_chr07    | 27081727               | [T/C] | SYNONYMOUS-CODING     |
| <i>OsMed12_1</i> | LOC_Os07g45400 | Os_chr07    | 27081278               | [C/G] | SYNONYMOUS-CODING     |
| <i>OsMed12_1</i> | LOC_Os07g45400 | Os_chr07    | 27079942               | [C/T] | SYNONYMOUS-CODING     |
| <i>OsMed12_1</i> | LOC_Os07g45400 | Os_chr07    | 27079768               | [G/A] | SYNONYMOUS-CODING     |
| <i>OsMed12_1</i> | LOC_Os07g45400 | Os_chr07    | 27079747               | [G/A] | SYNONYMOUS-CODING     |
| <i>OsMed12_1</i> | LOC_Os07g45400 | Os_chr07    | 27079663               | [A/G] | SYNONYMOUS-CODING     |
| <i>OsMed12_1</i> | LOC_Os07g45400 | Os_chr07    | 27079093               | [T/A] | SYNONYMOUS-CODING     |
| <i>OsMed12_1</i> | LOC_Os07g45400 | Os_chr07    | 27079006               | [G/A] | SYNONYMOUS-CODING     |
| <i>OsMed12_1</i> | LOC_Os07g45400 | Os_chr07    | 27075770               | [G/A] | SYNONYMOUS-CODING     |
| <i>OsMed12_1</i> | LOC_Os07g45400 | Os_chr07    | 27075737               | [G/A] | SYNONYMOUS-CODING     |
| <i>OsMed12_1</i> | LOC_Os07g45400 | Os_chr07    | 27075067               | [G/A] | SYNONYMOUS-CODING     |
| <i>OsMed12_1</i> | LOC_Os07g45400 | Os_chr07    | 27075019               | [C/T] | SYNONYMOUS-CODING     |
| <i>OsMed12_1</i> | LOC_Os07g45400 | Os_chr07    | 27072672               | [C/A] | SYNONYMOUS-CODING     |
| <i>OsMed12_1</i> | LOC_Os07g45400 | Os_chr07    | 27070572               | [C/G] | SYNONYMOUS-CODING     |
| <i>OsMed12_1</i> | LOC_Os07g45400 | Os_chr07    | 27070566               | [C/G] | SYNONYMOUS-CODING     |
| <i>OsMed12_1</i> | LOC_Os07g45400 | Os_chr07    | 27069119               | [T/C] | SYNONYMOUS-CODING     |
| <i>OsMed12_1</i> | LOC_Os07g45400 | Os_chr07    | 27069092               | [C/T] | SYNONYMOUS-CODING     |
| <i>OsMed12_1</i> | LOC_Os07g45400 | Os_chr07    | 27069080               | [C/T] | SYNONYMOUS-CODING     |
| <i>OsMed12_1</i> | LOC_Os07g45400 | Os_chr07    | 27069068               | [T/C] | SYNONYMOUS-CODING     |

| Mediator genes   | MSU locus ID   | Chromosomes | Physical Position (bp) | SNPs  | Structural Annotation |
|------------------|----------------|-------------|------------------------|-------|-----------------------|
| <i>OsMed12_1</i> | LOC_Os07g45400 | Os_chr07    | 27069050               | [C/T] | SYNONYMOUS-CODING     |
| <i>OsMed12_1</i> | LOC_Os07g45400 | Os_chr07    | 27069032               | [C/T] | SYNONYMOUS-CODING     |
| <i>OsMed12_2</i> | LOC_Os10g40260 | Os_chr10    | 21507688               | [C/A] | INTRON                |
| <i>OsMed12_2</i> | LOC_Os10g40260 | Os_chr10    | 21507626               | [C/T] | INTRON                |
| <i>OsMed12_2</i> | LOC_Os10g40260 | Os_chr10    | 21507446               | [C/T] | INTRON                |
| <i>OsMed12_2</i> | LOC_Os10g40260 | Os_chr10    | 21507268               | [C/T] | INTRON                |
| <i>OsMed12_2</i> | LOC_Os10g40260 | Os_chr10    | 21504635               | [T/C] | INTRON                |
| <i>OsMed12_2</i> | LOC_Os10g40260 | Os_chr10    | 21504606               | [A/G] | INTRON                |
| <i>OsMed12_2</i> | LOC_Os10g40260 | Os_chr10    | 21504354               | [G/A] | INTRON                |
| <i>OsMed12_2</i> | LOC_Os10g40260 | Os_chr10    | 21504182               | [T/G] | INTRON                |
| <i>OsMed12_2</i> | LOC_Os10g40260 | Os_chr10    | 21504047               | [C/T] | INTRON                |
| <i>OsMed12_2</i> | LOC_Os10g40260 | Os_chr10    | 21503929               | [T/C] | INTRON                |
| <i>OsMed12_2</i> | LOC_Os10g40260 | Os_chr10    | 21503431               | [T/G] | INTRON                |
| <i>OsMed12_2</i> | LOC_Os10g40260 | Os_chr10    | 21503360               | [A/T] | INTRON                |
| <i>OsMed12_2</i> | LOC_Os10g40260 | Os_chr10    | 21501011               | [C/T] | INTRON                |
| <i>OsMed12_2</i> | LOC_Os10g40260 | Os_chr10    | 21500124               | [A/G] | INTRON                |
| <i>OsMed12_2</i> | LOC_Os10g40260 | Os_chr10    | 21500085               | [T/C] | INTRON                |
| <i>OsMed12_2</i> | LOC_Os10g40260 | Os_chr10    | 21499972               | [C/T] | INTRON                |
| <i>OsMed12_2</i> | LOC_Os10g40260 | Os_chr10    | 21499861               | [C/T] | INTRON                |
| <i>OsMed12_2</i> | LOC_Os10g40260 | Os_chr10    | 21499621               | [G/T] | INTRON                |
| <i>OsMed12_2</i> | LOC_Os10g40260 | Os_chr10    | 21498946               | [T/A] | INTRON                |
| <i>OsMed12_2</i> | LOC_Os10g40260 | Os_chr10    | 21498662               | [A/C] | INTRON                |
| <i>OsMed12_2</i> | LOC_Os10g40260 | Os_chr10    | 21498353               | [C/T] | INTRON                |
| <i>OsMed12_2</i> | LOC_Os10g40260 | Os_chr10    | 21498320               | [C/T] | INTRON                |
| <i>OsMed12_2</i> | LOC_Os10g40260 | Os_chr10    | 21498285               | [A/T] | INTRON                |
| <i>OsMed12_2</i> | LOC_Os10g40260 | Os_chr10    | 21498164               | [C/T] | INTRON                |
| <i>OsMed12_2</i> | LOC_Os10g40260 | Os_chr10    | 21498089               | [G/T] | INTRON                |
| <i>OsMed12_2</i> | LOC_Os10g40260 | Os_chr10    | 21508418               | [C/A] | NON-SYNONYMOUS-CODING |
| <i>OsMed12_2</i> | LOC_Os10g40260 | Os_chr10    | 21508362               | [A/G] | NON-SYNONYMOUS-CODING |
| <i>OsMed12_2</i> | LOC_Os10g40260 | Os_chr10    | 21508303               | [C/T] | NON-SYNONYMOUS-CODING |
| <i>OsMed12_2</i> | LOC_Os10g40260 | Os_chr10    | 21508037               | [C/A] | NON-SYNONYMOUS-CODING |
| <i>OsMed12_2</i> | LOC_Os10g40260 | Os_chr10    | 21506940               | [T/A] | NON-SYNONYMOUS-CODING |
| <i>OsMed12_2</i> | LOC_Os10g40260 | Os_chr10    | 21503285               | [C/G] | NON-SYNONYMOUS-CODING |
| <i>OsMed12_2</i> | LOC_Os10g40260 | Os_chr10    | 21502760               | [A/G] | NON-SYNONYMOUS-CODING |
| <i>OsMed12_2</i> | LOC_Os10g40260 | Os_chr10    | 21501852               | [G/C] | NON-SYNONYMOUS-CODING |
| <i>OsMed12_2</i> | LOC_Os10g40260 | Os_chr10    | 21501824               | [T/C] | NON-SYNONYMOUS-CODING |
| <i>OsMed12_2</i> | LOC_Os10g40260 | Os_chr10    | 21500376               | [C/T] | NON-SYNONYMOUS-CODING |
| <i>OsMed12_2</i> | LOC_Os10g40260 | Os_chr10    | 21500360               | [G/A] | NON-SYNONYMOUS-CODING |
| <i>OsMed12_2</i> | LOC_Os10g40260 | Os_chr10    | 21508792               | [T/G] | REGULATORY            |
| <i>OsMed12_2</i> | LOC_Os10g40260 | Os_chr10    | 21508317               | [C/T] | SYNONYMOUS-CODING     |
| <i>OsMed12_2</i> | LOC_Os10g40260 | Os_chr10    | 21499834               | [T/C] | SYNONYMOUS-CODING     |
| <i>OsMed12_2</i> | LOC_Os10g40260 | Os_chr10    | 21497244               | [G/C] | REGULATORY            |
| <i>OsMed13_1</i> | LOC_Os05g37500 | Os_chr05    | 21896932               | [G/C] | INTRON                |
| <i>OsMed13_1</i> | LOC_Os05g37500 | Os_chr05    | 21896925               | [C/A] | INTRON                |
| <i>OsMed13_1</i> | LOC_Os05g37500 | Os_chr05    | 21896409               | [C/G] | INTRON                |
| <i>OsMed13_1</i> | LOC_Os05g37500 | Os_chr05    | 21896374               | [T/C] | INTRON                |
| <i>OsMed13_1</i> | LOC_Os05g37500 | Os_chr05    | 21895914               | [T/G] | INTRON                |

| Mediator genes   | MSU locus ID   | Chromosomes | Physical Position (bp) | SNPs  | Structural Annotation |
|------------------|----------------|-------------|------------------------|-------|-----------------------|
| <i>OsMed13_1</i> | LOC_Os05g37500 | Os_chr05    | 21895881               | [T/C] | INTRON                |
| <i>OsMed13_1</i> | LOC_Os05g37500 | Os_chr05    | 21895810               | [G/A] | INTRON                |
| <i>OsMed13_1</i> | LOC_Os05g37500 | Os_chr05    | 21895752               | [A/C] | INTRON                |
| <i>OsMed13_1</i> | LOC_Os05g37500 | Os_chr05    | 21895616               | [C/A] | INTRON                |
| <i>OsMed13_1</i> | LOC_Os05g37500 | Os_chr05    | 21895449               | [C/T] | INTRON                |
| <i>OsMed13_1</i> | LOC_Os05g37500 | Os_chr05    | 21895220               | [G/A] | INTRON                |
| <i>OsMed13_1</i> | LOC_Os05g37500 | Os_chr05    | 21894944               | [A/G] | INTRON                |
| <i>OsMed13_1</i> | LOC_Os05g37500 | Os_chr05    | 21894752               | [A/T] | INTRON                |
| <i>OsMed13_1</i> | LOC_Os05g37500 | Os_chr05    | 21894533               | [T/A] | INTRON                |
| <i>OsMed13_1</i> | LOC_Os05g37500 | Os_chr05    | 21894293               | [A/G] | INTRON                |
| <i>OsMed13_1</i> | LOC_Os05g37500 | Os_chr05    | 21894285               | [A/C] | INTRON                |
| <i>OsMed13_1</i> | LOC_Os05g37500 | Os_chr05    | 21894252               | [A/G] | INTRON                |
| <i>OsMed13_1</i> | LOC_Os05g37500 | Os_chr05    | 21894209               | [T/G] | INTRON                |
| <i>OsMed13_1</i> | LOC_Os05g37500 | Os_chr05    | 21894190               | [T/G] | INTRON                |
| <i>OsMed13_1</i> | LOC_Os05g37500 | Os_chr05    | 21894146               | [G/A] | INTRON                |
| <i>OsMed13_1</i> | LOC_Os05g37500 | Os_chr05    | 21894058               | [G/A] | INTRON                |
| <i>OsMed13_1</i> | LOC_Os05g37500 | Os_chr05    | 21893870               | [G/A] | INTRON                |
| <i>OsMed13_1</i> | LOC_Os05g37500 | Os_chr05    | 21893152               | [T/A] | INTRON                |
| <i>OsMed13_1</i> | LOC_Os05g37500 | Os_chr05    | 21893151               | [G/A] | INTRON                |
| <i>OsMed13_1</i> | LOC_Os05g37500 | Os_chr05    | 21893048               | [A/G] | INTRON                |
| <i>OsMed13_1</i> | LOC_Os05g37500 | Os_chr05    | 21892916               | [G/T] | INTRON                |
| <i>OsMed13_1</i> | LOC_Os05g37500 | Os_chr05    | 21892838               | [C/T] | INTRON                |
| <i>OsMed13_1</i> | LOC_Os05g37500 | Os_chr05    | 21892800               | [G/T] | INTRON                |
| <i>OsMed13_1</i> | LOC_Os05g37500 | Os_chr05    | 21892512               | [G/A] | INTRON                |
| <i>OsMed13_1</i> | LOC_Os05g37500 | Os_chr05    | 21892461               | [G/A] | INTRON                |
| <i>OsMed13_1</i> | LOC_Os05g37500 | Os_chr05    | 21892341               | [T/A] | INTRON                |
| <i>OsMed13_1</i> | LOC_Os05g37500 | Os_chr05    | 21892163               | [G/A] | INTRON                |
| <i>OsMed13_1</i> | LOC_Os05g37500 | Os_chr05    | 21892108               | [C/G] | INTRON                |
| <i>OsMed13_1</i> | LOC_Os05g37500 | Os_chr05    | 21891873               | [C/T] | INTRON                |
| <i>OsMed13_1</i> | LOC_Os05g37500 | Os_chr05    | 21891735               | [T/G] | INTRON                |
| <i>OsMed13_1</i> | LOC_Os05g37500 | Os_chr05    | 21891578               | [C/T] | INTRON                |
| <i>OsMed13_1</i> | LOC_Os05g37500 | Os_chr05    | 21890828               | [A/G] | INTRON                |
| <i>OsMed13_1</i> | LOC_Os05g37500 | Os_chr05    | 21890646               | [C/A] | INTRON                |
| <i>OsMed13_1</i> | LOC_Os05g37500 | Os_chr05    | 21890598               | [C/A] | INTRON                |
| <i>OsMed13_1</i> | LOC_Os05g37500 | Os_chr05    | 21890560               | [C/G] | INTRON                |
| <i>OsMed13_1</i> | LOC_Os05g37500 | Os_chr05    | 21890465               | [G/A] | INTRON                |
| <i>OsMed13_1</i> | LOC_Os05g37500 | Os_chr05    | 21889356               | [T/A] | INTRON                |
| <i>OsMed13_1</i> | LOC_Os05g37500 | Os_chr05    | 21889068               | [A/G] | INTRON                |
| <i>OsMed13_1</i> | LOC_Os05g37500 | Os_chr05    | 21888734               | [T/C] | INTRON                |
| <i>OsMed13_1</i> | LOC_Os05g37500 | Os_chr05    | 21888701               | [T/A] | INTRON                |
| <i>OsMed13_1</i> | LOC_Os05g37500 | Os_chr05    | 21888640               | [G/T] | INTRON                |
| <i>OsMed13_1</i> | LOC_Os05g37500 | Os_chr05    | 21888177               | [T/G] | INTRON                |
| <i>OsMed13_1</i> | LOC_Os05g37500 | Os_chr05    | 21887848               | [T/C] | INTRON                |
| <i>OsMed13_1</i> | LOC_Os05g37500 | Os_chr05    | 21885882               | [C/T] | INTRON                |
| <i>OsMed13_1</i> | LOC_Os05g37500 | Os_chr05    | 21885435               | [A/G] | INTRON                |
| <i>OsMed13_1</i> | LOC_Os05g37500 | Os_chr05    | 21885402               | [G/T] | INTRON                |
| <i>OsMed13_1</i> | LOC_Os05g37500 | Os_chr05    | 21885380               | [G/A] | INTRON                |

| Mediator genes   | MSU locus ID   | Chromosomes | Physical Position (bp) | SNPs  | Structural Annotation |
|------------------|----------------|-------------|------------------------|-------|-----------------------|
| <i>OsMed13_1</i> | LOC_Os05g37500 | Os_chr05    | 21885232               | [A/G] | INTRON                |
| <i>OsMed13_1</i> | LOC_Os05g37500 | Os_chr05    | 21885217               | [C/T] | INTRON                |
| <i>OsMed13_1</i> | LOC_Os05g37500 | Os_chr05    | 21885203               | [C/T] | INTRON                |
| <i>OsMed13_1</i> | LOC_Os05g37500 | Os_chr05    | 21884798               | [T/G] | INTRON                |
| <i>OsMed13_1</i> | LOC_Os05g37500 | Os_chr05    | 21883713               | [A/G] | INTRON                |
| <i>OsMed13_1</i> | LOC_Os05g37500 | Os_chr05    | 21883529               | [T/C] | INTRON                |
| <i>OsMed13_1</i> | LOC_Os05g37500 | Os_chr05    | 21881638               | [G/A] | INTRON                |
| <i>OsMed13_1</i> | LOC_Os05g37500 | Os_chr05    | 21881575               | [G/T] | INTRON                |
| <i>OsMed13_1</i> | LOC_Os05g37500 | Os_chr05    | 21881528               | [T/C] | INTRON                |
| <i>OsMed13_1</i> | LOC_Os05g37500 | Os_chr05    | 21881507               | [C/G] | INTRON                |
| <i>OsMed13_1</i> | LOC_Os05g37500 | Os_chr05    | 21881461               | [G/A] | INTRON                |
| <i>OsMed13_1</i> | LOC_Os05g37500 | Os_chr05    | 21897176               | [G/A] | NON-SYNONYMOUS-CODING |
| <i>OsMed13_1</i> | LOC_Os05g37500 | Os_chr05    | 21896678               | [C/T] | NON-SYNONYMOUS-CODING |
| <i>OsMed13_1</i> | LOC_Os05g37500 | Os_chr05    | 21896571               | [T/G] | NON-SYNONYMOUS-CODING |
| <i>OsMed13_1</i> | LOC_Os05g37500 | Os_chr05    | 21895022               | [T/C] | NON-SYNONYMOUS-CODING |
| <i>OsMed13_1</i> | LOC_Os05g37500 | Os_chr05    | 21895010               | [C/T] | NON-SYNONYMOUS-CODING |
| <i>OsMed13_1</i> | LOC_Os05g37500 | Os_chr05    | 21893773               | [G/A] | NON-SYNONYMOUS-CODING |
| <i>OsMed13_1</i> | LOC_Os05g37500 | Os_chr05    | 21887545               | [C/T] | NON-SYNONYMOUS-CODING |
| <i>OsMed13_1</i> | LOC_Os05g37500 | Os_chr05    | 21887098               | [A/T] | NON-SYNONYMOUS-CODING |
| <i>OsMed13_1</i> | LOC_Os05g37500 | Os_chr05    | 21881363               | [C/T] | NON-SYNONYMOUS-CODING |
| <i>OsMed13_1</i> | LOC_Os05g37500 | Os_chr05    | 21895050               | [C/A] | REGULATORY            |
| <i>OsMed13_1</i> | LOC_Os05g37500 | Os_chr05    | 21880560               | [G/A] | REGULATORY            |
| <i>OsMed13_1</i> | LOC_Os05g37500 | Os_chr05    | 21880513               | [T/C] | REGULATORY            |
| <i>OsMed13_1</i> | LOC_Os05g37500 | Os_chr05    | 21898227               | [T/G] | REGULATORY            |
| <i>OsMed13_1</i> | LOC_Os05g37500 | Os_chr05    | 21898224               | [T/G] | REGULATORY            |
| <i>OsMed13_1</i> | LOC_Os05g37500 | Os_chr05    | 21898002               | [T/C] | REGULATORY            |
| <i>OsMed13_1</i> | LOC_Os05g37500 | Os_chr05    | 21897974               | [T/G] | REGULATORY            |
| <i>OsMed13_1</i> | LOC_Os05g37500 | Os_chr05    | 21897966               | [A/G] | REGULATORY            |
| <i>OsMed13_1</i> | LOC_Os05g37500 | Os_chr05    | 21897663               | [C/G] | REGULATORY            |
| <i>OsMed13_1</i> | LOC_Os05g37500 | Os_chr05    | 21897615               | [G/T] | REGULATORY            |
| <i>OsMed13_1</i> | LOC_Os05g37500 | Os_chr05    | 21897076               | [G/A] | SYNONYMOUS-CODING     |
| <i>OsMed13_1</i> | LOC_Os05g37500 | Os_chr05    | 21893752               | [G/A] | SYNONYMOUS-CODING     |
| <i>OsMed13_1</i> | LOC_Os05g37500 | Os_chr05    | 21891094               | [G/A] | SYNONYMOUS-CODING     |
| <i>OsMed13_1</i> | LOC_Os05g37500 | Os_chr05    | 21890901               | [C/T] | SYNONYMOUS-CODING     |
| <i>OsMed13_1</i> | LOC_Os05g37500 | Os_chr05    | 21888951               | [T/C] | SYNONYMOUS-CODING     |
| <i>OsMed13_1</i> | LOC_Os05g37500 | Os_chr05    | 21888921               | [G/A] | SYNONYMOUS-CODING     |
| <i>OsMed13_1</i> | LOC_Os05g37500 | Os_chr05    | 21888912               | [G/A] | SYNONYMOUS-CODING     |
| <i>OsMed13_1</i> | LOC_Os05g37500 | Os_chr05    | 21887459               | [A/G] | SYNONYMOUS-CODING     |
| <i>OsMed13_1</i> | LOC_Os05g37500 | Os_chr05    | 21886084               | [T/C] | SYNONYMOUS-CODING     |
| <i>OsMed13_1</i> | LOC_Os05g37500 | Os_chr05    | 21885988               | [G/A] | SYNONYMOUS-CODING     |
| <i>OsMed13_1</i> | LOC_Os05g37500 | Os_chr05    | 21883499               | [A/T] | SYNONYMOUS-CODING     |
| <i>OsMed13_1</i> | LOC_Os05g37500 | Os_chr05    | 21883046               | [G/A] | SYNONYMOUS-CODING     |
| <i>OsMed13_1</i> | LOC_Os05g37500 | Os_chr05    | 21882926               | [T/C] | SYNONYMOUS-CODING     |
| <i>OsMed13_1</i> | LOC_Os05g37500 | Os_chr05    | 21882857               | [A/G] | SYNONYMOUS-CODING     |
| <i>OsMed13_1</i> | LOC_Os05g37500 | Os_chr05    | 21881115               | [A/G] | SYNONYMOUS-CODING     |
| <i>OsMed14_1</i> | LOC_Os08g24400 | Os_chr08    | 14738229               | [T/C] | INTRON                |
| <i>OsMed14_1</i> | LOC_Os08g24400 | Os_chr08    | 14738212               | [G/A] | INTRON                |



| Mediator genes   | MSU locus ID   | Chromosomes | Physical Position (bp) | SNPs  | Structural Annotation |
|------------------|----------------|-------------|------------------------|-------|-----------------------|
| <i>OsMed14_1</i> | LOC_Os08g24400 | Os_chr08    | 14738101               | [G/A] | INTRON                |
| <i>OsMed14_1</i> | LOC_Os08g24400 | Os_chr08    | 14738100               | [C/T] | INTRON                |
| <i>OsMed14_1</i> | LOC_Os08g24400 | Os_chr08    | 14738015               | [C/G] | INTRON                |
| <i>OsMed14_1</i> | LOC_Os08g24400 | Os_chr08    | 14737982               | [C/T] | INTRON                |
| <i>OsMed14_1</i> | LOC_Os08g24400 | Os_chr08    | 14737927               | [T/A] | INTRON                |
| <i>OsMed14_1</i> | LOC_Os08g24400 | Os_chr08    | 14737908               | [A/G] | INTRON                |
| <i>OsMed14_1</i> | LOC_Os08g24400 | Os_chr08    | 14737863               | [C/T] | INTRON                |
| <i>OsMed14_1</i> | LOC_Os08g24400 | Os_chr08    | 14737784               | [C/T] | INTRON                |
| <i>OsMed14_1</i> | LOC_Os08g24400 | Os_chr08    | 14737682               | [C/T] | INTRON                |
| <i>OsMed14_1</i> | LOC_Os08g24400 | Os_chr08    | 14737407               | [T/C] | INTRON                |
| <i>OsMed14_1</i> | LOC_Os08g24400 | Os_chr08    | 14737396               | [A/T] | INTRON                |
| <i>OsMed14_1</i> | LOC_Os08g24400 | Os_chr08    | 14737255               | [T/C] | INTRON                |
| <i>OsMed14_1</i> | LOC_Os08g24400 | Os_chr08    | 14737127               | [T/C] | INTRON                |
| <i>OsMed14_1</i> | LOC_Os08g24400 | Os_chr08    | 14737028               | [T/G] | INTRON                |
| <i>OsMed14_1</i> | LOC_Os08g24400 | Os_chr08    | 14736901               | [T/A] | INTRON                |
| <i>OsMed14_1</i> | LOC_Os08g24400 | Os_chr08    | 14736824               | [G/A] | INTRON                |
| <i>OsMed14_1</i> | LOC_Os08g24400 | Os_chr08    | 14736727               | [A/G] | INTRON                |
| <i>OsMed14_1</i> | LOC_Os08g24400 | Os_chr08    | 14736662               | [C/T] | INTRON                |
| <i>OsMed14_1</i> | LOC_Os08g24400 | Os_chr08    | 14736610               | [G/A] | INTRON                |
| <i>OsMed14_1</i> | LOC_Os08g24400 | Os_chr08    | 14736594               | [A/T] | INTRON                |
| <i>OsMed14_1</i> | LOC_Os08g24400 | Os_chr08    | 14739304               | [T/C] | NON-SYNONYMOUS-CODING |
| <i>OsMed14_1</i> | LOC_Os08g24400 | Os_chr08    | 14739250               | [C/T] | NON-SYNONYMOUS-CODING |
| <i>OsMed14_1</i> | LOC_Os08g24400 | Os_chr08    | 14739135               | [C/G] | NON-SYNONYMOUS-CODING |
| <i>OsMed14_1</i> | LOC_Os08g24400 | Os_chr08    | 14738558               | [A/T] | NON-SYNONYMOUS-CODING |
| <i>OsMed14_1</i> | LOC_Os08g24400 | Os_chr08    | 14738521               | [C/T] | NON-SYNONYMOUS-CODING |
| <i>OsMed14_1</i> | LOC_Os08g24400 | Os_chr08    | 14736229               | [G/A] | REGULATORY            |
| <i>OsMed14_1</i> | LOC_Os08g24400 | Os_chr08    | 14736149               | [T/G] | REGULATORY            |
| <i>OsMed14_1</i> | LOC_Os08g24400 | Os_chr08    | 14735959               | [C/T] | REGULATORY            |
| <i>OsMed14_1</i> | LOC_Os08g24400 | Os_chr08    | 14735756               | [C/A] | REGULATORY            |
| <i>OsMed14_1</i> | LOC_Os08g24400 | Os_chr08    | 14735715               | [C/T] | REGULATORY            |
| <i>OsMed14_1</i> | LOC_Os08g24400 | Os_chr08    | 14735474               | [C/T] | REGULATORY            |
| <i>OsMed14_1</i> | LOC_Os08g24400 | Os_chr08    | 14735459               | [C/G] | REGULATORY            |
| <i>OsMed14_1</i> | LOC_Os08g24400 | Os_chr08    | 14735425               | [C/T] | REGULATORY            |
| <i>OsMed14_1</i> | LOC_Os08g24400 | Os_chr08    | 14735419               | [G/A] | REGULATORY            |
| <i>OsMed14_1</i> | LOC_Os08g24400 | Os_chr08    | 14735405               | [A/T] | REGULATORY            |
| <i>OsMed14_1</i> | LOC_Os08g24400 | Os_chr08    | 14735329               | [G/A] | REGULATORY            |
| <i>OsMed14_1</i> | LOC_Os08g24400 | Os_chr08    | 14735328               | [C/T] | REGULATORY            |
| <i>OsMed14_1</i> | LOC_Os08g24400 | Os_chr08    | 14735314               | [C/T] | REGULATORY            |
| <i>OsMed14_1</i> | LOC_Os08g24400 | Os_chr08    | 14735252               | [C/T] | REGULATORY            |
| <i>OsMed14_1</i> | LOC_Os08g24400 | Os_chr08    | 14735241               | [G/A] | REGULATORY            |
| <i>OsMed14_1</i> | LOC_Os08g24400 | Os_chr08    | 14735168               | [G/A] | REGULATORY            |
| <i>OsMed14_1</i> | LOC_Os08g24400 | Os_chr08    | 14735162               | [G/A] | REGULATORY            |
| <i>OsMed14_1</i> | LOC_Os08g24400 | Os_chr08    | 14735157               | [A/G] | REGULATORY            |
| <i>OsMed14_1</i> | LOC_Os08g24400 | Os_chr08    | 14735144               | [C/T] | REGULATORY            |
| <i>OsMed14_1</i> | LOC_Os08g24400 | Os_chr08    | 14735070               | [A/T] | REGULATORY            |
| <i>OsMed14_1</i> | LOC_Os08g24400 | Os_chr08    | 14735038               | [C/T] | REGULATORY            |
| <i>OsMed14_1</i> | LOC_Os08g24400 | Os_chr08    | 14735026               | [C/T] | REGULATORY            |

| Mediator genes   | MSU locus ID   | Chromosomes | Physical Position (bp) | SNPs  | Structural Annotation |
|------------------|----------------|-------------|------------------------|-------|-----------------------|
| <i>OsMed14_1</i> | LOC_Os08g24400 | Os_chr08    | 14735022               | [T/G] | REGULATORY            |
| <i>OsMed14_1</i> | LOC_Os08g24400 | Os_chr08    | 14735013               | [C/T] | REGULATORY            |
| <i>OsMed14_1</i> | LOC_Os08g24400 | Os_chr08    | 14734978               | [C/G] | REGULATORY            |
| <i>OsMed14_1</i> | LOC_Os08g24400 | Os_chr08    | 14734971               | [G/A] | REGULATORY            |
| <i>OsMed14_1</i> | LOC_Os08g24400 | Os_chr08    | 14734951               | [T/G] | REGULATORY            |
| <i>OsMed14_1</i> | LOC_Os08g24400 | Os_chr08    | 14734947               | [G/A] | REGULATORY            |
| <i>OsMed14_1</i> | LOC_Os08g24400 | Os_chr08    | 14734928               | [A/C] | REGULATORY            |
| <i>OsMed14_1</i> | LOC_Os08g24400 | Os_chr08    | 14734881               | [C/T] | REGULATORY            |
| <i>OsMed14_1</i> | LOC_Os08g24400 | Os_chr08    | 14739369               | [G/T] | SYNONYMOUS-CODING     |
| <i>OsMed14_1</i> | LOC_Os08g24400 | Os_chr08    | 14738883               | [T/C] | SYNONYMOUS-CODING     |
| <i>OsMed14_1</i> | LOC_Os08g24400 | Os_chr08    | 14738403               | [T/A] | SYNONYMOUS-CODING     |
| <i>OsMed14_1</i> | LOC_Os08g24400 | Os_chr08    | 14738400               | [T/C] | SYNONYMOUS-CODING     |
| <i>OsMed14_1</i> | LOC_Os08g24400 | Os_chr08    | 14738325               | [C/T] | SYNONYMOUS-CODING     |
| <i>OsMed14_1</i> | LOC_Os08g24400 | Os_chr08    | 14736452               | [C/T] | SYNONYMOUS-CODING     |
| <i>OsMed14_1</i> | LOC_Os08g24400 | Os_chr08    | 14736422               | [C/T] | SYNONYMOUS-CODING     |
| <i>OsMed14_1</i> | LOC_Os08g24400 | Os_chr08    | 14736335               | [C/T] | SYNONYMOUS-CODING     |
| <i>OsMed14_2</i> | LOC_Os09g10960 | Os_chr09    | 6044817                | [A/T] | INTRON                |
| <i>OsMed14_2</i> | LOC_Os09g10960 | Os_chr09    | 6043563                | [T/C] | INTRON                |
| <i>OsMed14_2</i> | LOC_Os09g10960 | Os_chr09    | 6040991                | [C/G] | INTRON                |
| <i>OsMed14_2</i> | LOC_Os09g10960 | Os_chr09    | 6044991                | [G/A] | INTRON                |
| <i>OsMed14_2</i> | LOC_Os09g10960 | Os_chr09    | 6047360                | [C/T] | INTRON                |
| <i>OsMed14_2</i> | LOC_Os09g10960 | Os_chr09    | 6041201                | [A/C] | INTRON                |
| <i>OsMed14_2</i> | LOC_Os09g10960 | Os_chr09    | 6042946                | [A/T] | INTRON                |
| <i>OsMed14_2</i> | LOC_Os09g10960 | Os_chr09    | 6047076                | [T/C] | INTRON                |
| <i>OsMed14_2</i> | LOC_Os09g10960 | Os_chr09    | 6047614                | [G/A] | INTRON                |
| <i>OsMed14_2</i> | LOC_Os09g10960 | Os_chr09    | 6046961                | [A/G] | INTRON                |
| <i>OsMed14_2</i> | LOC_Os09g10960 | Os_chr09    | 6041169                | [C/T] | INTRON                |
| <i>OsMed14_2</i> | LOC_Os09g10960 | Os_chr09    | 6038799                | [A/T] | INTRON                |
| <i>OsMed14_2</i> | LOC_Os09g10960 | Os_chr09    | 6042782                | [A/G] | INTRON                |
| <i>OsMed14_2</i> | LOC_Os09g10960 | Os_chr09    | 6045017                | [C/A] | INTRON                |
| <i>OsMed14_2</i> | LOC_Os09g10960 | Os_chr09    | 6041488                | [T/C] | INTRON                |
| <i>OsMed14_2</i> | LOC_Os09g10960 | Os_chr09    | 6042745                | [C/A] | INTRON                |
| <i>OsMed14_2</i> | LOC_Os09g10960 | Os_chr09    | 6046876                | [C/T] | INTRON                |
| <i>OsMed14_2</i> | LOC_Os09g10960 | Os_chr09    | 6045567                | [T/C] | INTRON                |
| <i>OsMed14_2</i> | LOC_Os09g10960 | Os_chr09    | 6043317                | [G/A] | INTRON                |
| <i>OsMed14_2</i> | LOC_Os09g10960 | Os_chr09    | 6044042                | [C/T] | INTRON                |
| <i>OsMed14_2</i> | LOC_Os09g10960 | Os_chr09    | 6043711                | [C/T] | INTRON                |
| <i>OsMed14_2</i> | LOC_Os09g10960 | Os_chr09    | 6042938                | [A/C] | INTRON                |
| <i>OsMed14_2</i> | LOC_Os09g10960 | Os_chr09    | 6043596                | [A/G] | INTRON                |
| <i>OsMed14_2</i> | LOC_Os09g10960 | Os_chr09    | 6046824                | [G/A] | INTRON                |
| <i>OsMed14_2</i> | LOC_Os09g10960 | Os_chr09    | 6044977                | [C/A] | INTRON                |
| <i>OsMed14_2</i> | LOC_Os09g10960 | Os_chr09    | 6043525                | [G/A] | INTRON                |
| <i>OsMed14_2</i> | LOC_Os09g10960 | Os_chr09    | 6043190                | [T/A] | INTRON                |
| <i>OsMed14_2</i> | LOC_Os09g10960 | Os_chr09    | 6045283                | [C/T] | INTRON                |
| <i>OsMed14_2</i> | LOC_Os09g10960 | Os_chr09    | 6041359                | [T/C] | INTRON                |
| <i>OsMed14_2</i> | LOC_Os09g10960 | Os_chr09    | 6043951                | [G/A] | INTRON                |
| <i>OsMed14_2</i> | LOC_Os09g10960 | Os_chr09    | 6043179                | [G/T] | INTRON                |

| Mediator genes   | MSU locus ID   | Chromosomes | Physical Position (bp) | SNPs  | Structural Annotation |
|------------------|----------------|-------------|------------------------|-------|-----------------------|
| <i>OsMed14_2</i> | LOC_Os09g10960 | Os_chr09    | 6038225                | [C/G] | INTRON                |
| <i>OsMed14_2</i> | LOC_Os09g10960 | Os_chr09    | 6038194                | [G/A] | INTRON                |
| <i>OsMed14_2</i> | LOC_Os09g10960 | Os_chr09    | 6038512                | [G/A] | INTRON                |
| <i>OsMed14_2</i> | LOC_Os09g10960 | Os_chr09    | 6042653                | [G/A] | INTRON                |
| <i>OsMed14_2</i> | LOC_Os09g10960 | Os_chr09    | 6038842                | [A/G] | INTRON                |
| <i>OsMed14_2</i> | LOC_Os09g10960 | Os_chr09    | 6043985                | [G/A] | INTRON                |
| <i>OsMed14_2</i> | LOC_Os09g10960 | Os_chr09    | 6043461                | [G/A] | INTRON                |
| <i>OsMed14_2</i> | LOC_Os09g10960 | Os_chr09    | 6038761                | [A/G] | INTRON                |
| <i>OsMed14_2</i> | LOC_Os09g10960 | Os_chr09    | 6046904                | [T/C] | INTRON                |
| <i>OsMed14_2</i> | LOC_Os09g10960 | Os_chr09    | 6045051                | [T/C] | INTRON                |
| <i>OsMed14_2</i> | LOC_Os09g10960 | Os_chr09    | 6043914                | [A/G] | INTRON                |
| <i>OsMed14_2</i> | LOC_Os09g10960 | Os_chr09    | 6042477                | [A/G] | INTRON                |
| <i>OsMed14_2</i> | LOC_Os09g10960 | Os_chr09    | 6041165                | [T/G] | INTRON                |
| <i>OsMed14_2</i> | LOC_Os09g10960 | Os_chr09    | 6038159                | [A/G] | INTRON                |
| <i>OsMed14_2</i> | LOC_Os09g10960 | Os_chr09    | 6046656                | [C/T] | INTRON                |
| <i>OsMed14_2</i> | LOC_Os09g10960 | Os_chr09    | 6043887                | [G/A] | INTRON                |
| <i>OsMed14_2</i> | LOC_Os09g10960 | Os_chr09    | 6041274                | [A/T] | INTRON                |
| <i>OsMed14_2</i> | LOC_Os09g10960 | Os_chr09    | 6041167                | [C/T] | INTRON                |
| <i>OsMed14_2</i> | LOC_Os09g10960 | Os_chr09    | 6044551                | [G/A] | INTRON                |
| <i>OsMed14_2</i> | LOC_Os09g10960 | Os_chr09    | 6046892                | [C/T] | INTRON                |
| <i>OsMed14_2</i> | LOC_Os09g10960 | Os_chr09    | 6047135                | [T/C] | INTRON                |
| <i>OsMed14_2</i> | LOC_Os09g10960 | Os_chr09    | 6044875                | [C/A] | INTRON                |
| <i>OsMed14_2</i> | LOC_Os09g10960 | Os_chr09    | 6038425                | [C/T] | INTRON                |
| <i>OsMed14_2</i> | LOC_Os09g10960 | Os_chr09    | 6038801                | [G/A] | INTRON                |
| <i>OsMed14_2</i> | LOC_Os09g10960 | Os_chr09    | 6041508                | [G/A] | INTRON                |
| <i>OsMed14_2</i> | LOC_Os09g10960 | Os_chr09    | 6044350                | [T/A] | INTRON                |
| <i>OsMed14_2</i> | LOC_Os09g10960 | Os_chr09    | 6043673                | [G/A] | INTRON                |
| <i>OsMed14_2</i> | LOC_Os09g10960 | Os_chr09    | 6046790                | [G/C] | INTRON                |
| <i>OsMed14_2</i> | LOC_Os09g10960 | Os_chr09    | 6045321                | [C/T] | INTRON                |
| <i>OsMed14_2</i> | LOC_Os09g10960 | Os_chr09    | 6045042                | [G/T] | INTRON                |
| <i>OsMed14_2</i> | LOC_Os09g10960 | Os_chr09    | 6044711                | [T/A] | INTRON                |
| <i>OsMed14_2</i> | LOC_Os09g10960 | Os_chr09    | 6043321                | [G/A] | INTRON                |
| <i>OsMed14_2</i> | LOC_Os09g10960 | Os_chr09    | 6040985                | [G/A] | INTRON                |
| <i>OsMed14_2</i> | LOC_Os09g10960 | Os_chr09    | 6043708                | [C/G] | INTRON                |
| <i>OsMed14_2</i> | LOC_Os09g10960 | Os_chr09    | 6042847                | [T/G] | INTRON                |
| <i>OsMed14_2</i> | LOC_Os09g10960 | Os_chr09    | 6042759                | [T/A] | INTRON                |
| <i>OsMed14_2</i> | LOC_Os09g10960 | Os_chr09    | 6041308                | [T/C] | INTRON                |
| <i>OsMed14_2</i> | LOC_Os09g10960 | Os_chr09    | 6046657                | [A/G] | INTRON                |
| <i>OsMed14_2</i> | LOC_Os09g10960 | Os_chr09    | 6044681                | [C/T] | INTRON                |
| <i>OsMed14_2</i> | LOC_Os09g10960 | Os_chr09    | 6038351                | [G/A] | INTRON                |
| <i>OsMed14_2</i> | LOC_Os09g10960 | Os_chr09    | 6046003                | [G/A] | NON-SYNONYMOUS-CODING |
| <i>OsMed14_2</i> | LOC_Os09g10960 | Os_chr09    | 6046061                | [G/T] | NON-SYNONYMOUS-CODING |
| <i>OsMed14_2</i> | LOC_Os09g10960 | Os_chr09    | 6037811                | [A/C] | NON-SYNONYMOUS-CODING |
| <i>OsMed14_2</i> | LOC_Os09g10960 | Os_chr09    | 6039629                | [G/A] | NON-SYNONYMOUS-CODING |
| <i>OsMed14_2</i> | LOC_Os09g10960 | Os_chr09    | 6037822                | [G/A] | NON-SYNONYMOUS-CODING |
| <i>OsMed14_2</i> | LOC_Os09g10960 | Os_chr09    | 6040197                | [A/T] | NON-SYNONYMOUS-CODING |
| <i>OsMed14_2</i> | LOC_Os09g10960 | Os_chr09    | 6040796                | [G/A] | NON-SYNONYMOUS-CODING |

| Mediator genes   | MSU locus ID   | Chromosomes | Physical Position (bp) | SNPs  | Structural Annotation |
|------------------|----------------|-------------|------------------------|-------|-----------------------|
| <i>OsMed14_2</i> | LOC_Os09g10960 | Os_chr09    | 6042095                | [C/T] | NON-SYNONYMOUS-CODING |
| <i>OsMed14_2</i> | LOC_Os09g10960 | Os_chr09    | 6039689                | [G/A] | NON-SYNONYMOUS-CODING |
| <i>OsMed14_2</i> | LOC_Os09g10960 | Os_chr09    | 6040890                | [G/C] | NON-SYNONYMOUS-CODING |
| <i>OsMed14_2</i> | LOC_Os09g10960 | Os_chr09    | 6042351                | [C/G] | NON-SYNONYMOUS-CODING |
| <i>OsMed14_2</i> | LOC_Os09g10960 | Os_chr09    | 6046429                | [G/A] | NON-SYNONYMOUS-CODING |
| <i>OsMed14_2</i> | LOC_Os09g10960 | Os_chr09    | 6045778                | [A/C] | NON-SYNONYMOUS-CODING |
| <i>OsMed14_2</i> | LOC_Os09g10960 | Os_chr09    | 6047887                | [T/C] | NON-SYNONYMOUS-CODING |
| <i>OsMed14_2</i> | LOC_Os09g10960 | Os_chr09    | 6040689                | [T/C] | NON-SYNONYMOUS-CODING |
| <i>OsMed14_2</i> | LOC_Os09g10960 | Os_chr09    | 6037542                | [A/G] | NON-SYNONYMOUS-CODING |
| <i>OsMed14_2</i> | LOC_Os09g10960 | Os_chr09    | 6039690                | [C/T] | NON-SYNONYMOUS-CODING |
| <i>OsMed14_2</i> | LOC_Os09g10960 | Os_chr09    | 6045929                | [C/T] | NON-SYNONYMOUS-CODING |
| <i>OsMed14_2</i> | LOC_Os09g10960 | Os_chr09    | 6048075                | [A/T] | REGULATORY            |
| <i>OsMed14_2</i> | LOC_Os09g10960 | Os_chr09    | 6047958                | [G/T] | REGULATORY            |
| <i>OsMed14_2</i> | LOC_Os09g10960 | Os_chr09    | 6047936                | [T/C] | REGULATORY            |
| <i>OsMed14_2</i> | LOC_Os09g10960 | Os_chr09    | 6048168                | [G/A] | REGULATORY            |
| <i>OsMed14_2</i> | LOC_Os09g10960 | Os_chr09    | 6047937                | [C/T] | REGULATORY            |
| <i>OsMed14_2</i> | LOC_Os09g10960 | Os_chr09    | 6036888                | [T/C] | REGULATORY            |
| <i>OsMed14_2</i> | LOC_Os09g10960 | Os_chr09    | 6036944                | [C/T] | REGULATORY            |
| <i>OsMed14_2</i> | LOC_Os09g10960 | Os_chr09    | 6048791                | [G/A] | REGULATORY            |
| <i>OsMed14_2</i> | LOC_Os09g10960 | Os_chr09    | 6048662                | [T/G] | REGULATORY            |
| <i>OsMed14_2</i> | LOC_Os09g10960 | Os_chr09    | 6048989                | [A/C] | REGULATORY            |
| <i>OsMed14_2</i> | LOC_Os09g10960 | Os_chr09    | 6049112                | [A/G] | REGULATORY            |
| <i>OsMed14_2</i> | LOC_Os09g10960 | Os_chr09    | 6049123                | [G/A] | REGULATORY            |
| <i>OsMed14_2</i> | LOC_Os09g10960 | Os_chr09    | 6048681                | [T/C] | REGULATORY            |
| <i>OsMed14_2</i> | LOC_Os09g10960 | Os_chr09    | 6048665                | [A/G] | REGULATORY            |
| <i>OsMed14_2</i> | LOC_Os09g10960 | Os_chr09    | 6048605                | [T/G] | REGULATORY            |
| <i>OsMed14_2</i> | LOC_Os09g10960 | Os_chr09    | 6049094                | [C/T] | REGULATORY            |
| <i>OsMed14_2</i> | LOC_Os09g10960 | Os_chr09    | 6049083                | [G/A] | REGULATORY            |
| <i>OsMed14_2</i> | LOC_Os09g10960 | Os_chr09    | 6049039                | [A/G] | REGULATORY            |
| <i>OsMed14_2</i> | LOC_Os09g10960 | Os_chr09    | 6048915                | [A/T] | REGULATORY            |
| <i>OsMed14_2</i> | LOC_Os09g10960 | Os_chr09    | 6048854                | [A/G] | REGULATORY            |
| <i>OsMed14_2</i> | LOC_Os09g10960 | Os_chr09    | 6049048                | [T/C] | REGULATORY            |
| <i>OsMed14_2</i> | LOC_Os09g10960 | Os_chr09    | 6048668                | [A/G] | REGULATORY            |
| <i>OsMed14_2</i> | LOC_Os09g10960 | Os_chr09    | 6049082                | [G/A] | REGULATORY            |
| <i>OsMed14_2</i> | LOC_Os09g10960 | Os_chr09    | 6048997                | [C/T] | REGULATORY            |
| <i>OsMed14_2</i> | LOC_Os09g10960 | Os_chr09    | 6049155                | [C/A] | REGULATORY            |
| <i>OsMed14_2</i> | LOC_Os09g10960 | Os_chr09    | 6048907                | [C/A] | REGULATORY            |
| <i>OsMed14_2</i> | LOC_Os09g10960 | Os_chr09    | 6048794                | [G/T] | REGULATORY            |
| <i>OsMed14_2</i> | LOC_Os09g10960 | Os_chr09    | 6049002                | [C/T] | REGULATORY            |
| <i>OsMed14_2</i> | LOC_Os09g10960 | Os_chr09    | 6048459                | [T/C] | REGULATORY            |
| <i>OsMed14_2</i> | LOC_Os09g10960 | Os_chr09    | 6048345                | [G/C] | REGULATORY            |
| <i>OsMed14_2</i> | LOC_Os09g10960 | Os_chr09    | 6048811                | [C/A] | REGULATORY            |
| <i>OsMed14_2</i> | LOC_Os09g10960 | Os_chr09    | 6049012                | [G/A] | REGULATORY            |
| <i>OsMed14_2</i> | LOC_Os09g10960 | Os_chr09    | 6048929                | [T/C] | REGULATORY            |
| <i>OsMed14_2</i> | LOC_Os09g10960 | Os_chr09    | 6048813                | [C/T] | REGULATORY            |
| <i>OsMed14_2</i> | LOC_Os09g10960 | Os_chr09    | 6048572                | [C/T] | REGULATORY            |
| <i>OsMed14_2</i> | LOC_Os09g10960 | Os_chr09    | 6043152                | [G/A] | SYNONYMOUS-CODING     |

| Mediator genes   | MSU locus ID   | Chromosomes | Physical Position (bp) | SNPs  | Structural Annotation |
|------------------|----------------|-------------|------------------------|-------|-----------------------|
| <i>OsMed14_2</i> | LOC_Os09g10960 | Os_chr09    | 6040150                | [G/A] | SYNONYMOUS-CODING     |
| <i>OsMed14_2</i> | LOC_Os09g10960 | Os_chr09    | 6046488                | [C/T] | SYNONYMOUS-CODING     |
| <i>OsMed14_2</i> | LOC_Os09g10960 | Os_chr09    | 6043119                | [G/A] | SYNONYMOUS-CODING     |
| <i>OsMed14_2</i> | LOC_Os09g10960 | Os_chr09    | 6045969                | [A/G] | SYNONYMOUS-CODING     |
| <i>OsMed14_2</i> | LOC_Os09g10960 | Os_chr09    | 6046119                | [C/T] | SYNONYMOUS-CODING     |
| <i>OsMed14_2</i> | LOC_Os09g10960 | Os_chr09    | 6037760                | [T/C] | SYNONYMOUS-CODING     |
| <i>OsMed14_2</i> | LOC_Os09g10960 | Os_chr09    | 6046224                | [A/T] | SYNONYMOUS-CODING     |
| <i>OsMed14_2</i> | LOC_Os09g10960 | Os_chr09    | 6047703                | [G/A] | SYNONYMOUS-CODING     |
| <i>OsMed14_2</i> | LOC_Os09g10960 | Os_chr09    | 6039886                | [G/A] | SYNONYMOUS-CODING     |
| <i>OsMed14_2</i> | LOC_Os09g10960 | Os_chr09    | 6040660                | [A/T] | SYNONYMOUS-CODING     |
| <i>OsMed14_2</i> | LOC_Os09g10960 | Os_chr09    | 6046389                | [G/A] | SYNONYMOUS-CODING     |
| <i>OsMed14_2</i> | LOC_Os09g10960 | Os_chr09    | 6045795                | [C/T] | SYNONYMOUS-CODING     |
| <i>OsMed14_2</i> | LOC_Os09g10960 | Os_chr09    | 6039112                | [G/A] | SYNONYMOUS-CODING     |
| <i>OsMed14_2</i> | LOC_Os09g10960 | Os_chr09    | 6037445                | [G/A] | SYNONYMOUS-CODING     |
| <i>OsMed14_2</i> | LOC_Os09g10960 | Os_chr09    | 6040351                | [A/G] | SYNONYMOUS-CODING     |
| <i>OsMed14_2</i> | LOC_Os09g10960 | Os_chr09    | 6040924                | [A/G] | SYNONYMOUS-CODING     |
| <i>OsMed14_2</i> | LOC_Os09g10960 | Os_chr09    | 6037883                | [C/T] | SYNONYMOUS-CODING     |
| <i>OsMed14_2</i> | LOC_Os09g10960 | Os_chr09    | 6039544                | [C/T] | SYNONYMOUS-CODING     |
| <i>OsMed15_1</i> | LOC_Os04g03860 | Os_chr04    | 1754898                | [T/C] | INTRON                |
| <i>OsMed15_1</i> | LOC_Os04g03860 | Os_chr04    | 1754748                | [A/G] | INTRON                |
| <i>OsMed15_1</i> | LOC_Os04g03860 | Os_chr04    | 1754728                | [C/T] | INTRON                |
| <i>OsMed15_1</i> | LOC_Os04g03860 | Os_chr04    | 1754720                | [G/T] | INTRON                |
| <i>OsMed15_1</i> | LOC_Os04g03860 | Os_chr04    | 1754681                | [T/C] | INTRON                |
| <i>OsMed15_1</i> | LOC_Os04g03860 | Os_chr04    | 1754667                | [T/A] | INTRON                |
| <i>OsMed15_1</i> | LOC_Os04g03860 | Os_chr04    | 1754434                | [C/T] | INTRON                |
| <i>OsMed15_1</i> | LOC_Os04g03860 | Os_chr04    | 1754431                | [G/A] | INTRON                |
| <i>OsMed15_1</i> | LOC_Os04g03860 | Os_chr04    | 1754409                | [A/T] | INTRON                |
| <i>OsMed15_1</i> | LOC_Os04g03860 | Os_chr04    | 1754374                | [G/A] | INTRON                |
| <i>OsMed15_1</i> | LOC_Os04g03860 | Os_chr04    | 1754357                | [T/C] | INTRON                |
| <i>OsMed15_1</i> | LOC_Os04g03860 | Os_chr04    | 1753988                | [G/T] | INTRON                |
| <i>OsMed15_1</i> | LOC_Os04g03860 | Os_chr04    | 1753074                | [C/T] | INTRON                |
| <i>OsMed15_1</i> | LOC_Os04g03860 | Os_chr04    | 1753069                | [C/T] | INTRON                |
| <i>OsMed15_1</i> | LOC_Os04g03860 | Os_chr04    | 1753049                | [T/C] | INTRON                |
| <i>OsMed15_1</i> | LOC_Os04g03860 | Os_chr04    | 1753039                | [A/T] | INTRON                |
| <i>OsMed15_1</i> | LOC_Os04g03860 | Os_chr04    | 1752987                | [A/T] | INTRON                |
| <i>OsMed15_1</i> | LOC_Os04g03860 | Os_chr04    | 1752918                | [G/A] | INTRON                |
| <i>OsMed15_1</i> | LOC_Os04g03860 | Os_chr04    | 1752883                | [G/C] | INTRON                |
| <i>OsMed15_1</i> | LOC_Os04g03860 | Os_chr04    | 1752563                | [T/C] | INTRON                |
| <i>OsMed15_1</i> | LOC_Os04g03860 | Os_chr04    | 1752510                | [A/G] | INTRON                |
| <i>OsMed15_1</i> | LOC_Os04g03860 | Os_chr04    | 1752494                | [C/T] | INTRON                |
| <i>OsMed15_1</i> | LOC_Os04g03860 | Os_chr04    | 1752480                | [C/G] | INTRON                |
| <i>OsMed15_1</i> | LOC_Os04g03860 | Os_chr04    | 1752360                | [A/T] | INTRON                |
| <i>OsMed15_1</i> | LOC_Os04g03860 | Os_chr04    | 1752354                | [G/C] | INTRON                |
| <i>OsMed15_1</i> | LOC_Os04g03860 | Os_chr04    | 1752343                | [G/A] | INTRON                |
| <i>OsMed15_1</i> | LOC_Os04g03860 | Os_chr04    | 1752319                | [A/G] | INTRON                |
| <i>OsMed15_1</i> | LOC_Os04g03860 | Os_chr04    | 1752318                | [G/A] | INTRON                |
| <i>OsMed15_1</i> | LOC_Os04g03860 | Os_chr04    | 1752289                | [G/A] | INTRON                |

| Mediator genes   | MSU locus ID   | Chromosomes | Physical Position (bp) | SNPs  | Structural Annotation |
|------------------|----------------|-------------|------------------------|-------|-----------------------|
| <i>OsMed15_1</i> | LOC_Os04g03860 | Os_chr04    | 1752160                | [C/T] | INTRON                |
| <i>OsMed15_1</i> | LOC_Os04g03860 | Os_chr04    | 1752147                | [A/C] | INTRON                |
| <i>OsMed15_1</i> | LOC_Os04g03860 | Os_chr04    | 1752113                | [A/T] | INTRON                |
| <i>OsMed15_1</i> | LOC_Os04g03860 | Os_chr04    | 1751320                | [C/T] | INTRON                |
| <i>OsMed15_1</i> | LOC_Os04g03860 | Os_chr04    | 1751255                | [G/T] | INTRON                |
| <i>OsMed15_1</i> | LOC_Os04g03860 | Os_chr04    | 1751191                | [A/G] | INTRON                |
| <i>OsMed15_1</i> | LOC_Os04g03860 | Os_chr04    | 1751153                | [G/A] | INTRON                |
| <i>OsMed15_1</i> | LOC_Os04g03860 | Os_chr04    | 1751113                | [G/A] | INTRON                |
| <i>OsMed15_1</i> | LOC_Os04g03860 | Os_chr04    | 1751031                | [A/T] | INTRON                |
| <i>OsMed15_1</i> | LOC_Os04g03860 | Os_chr04    | 1750881                | [A/G] | INTRON                |
| <i>OsMed15_1</i> | LOC_Os04g03860 | Os_chr04    | 1750871                | [C/T] | INTRON                |
| <i>OsMed15_1</i> | LOC_Os04g03860 | Os_chr04    | 1750812                | [C/A] | INTRON                |
| <i>OsMed15_1</i> | LOC_Os04g03860 | Os_chr04    | 1750758                | [T/C] | INTRON                |
| <i>OsMed15_1</i> | LOC_Os04g03860 | Os_chr04    | 1750754                | [G/A] | INTRON                |
| <i>OsMed15_1</i> | LOC_Os04g03860 | Os_chr04    | 1750739                | [T/A] | INTRON                |
| <i>OsMed15_1</i> | LOC_Os04g03860 | Os_chr04    | 1750699                | [C/G] | INTRON                |
| <i>OsMed15_1</i> | LOC_Os04g03860 | Os_chr04    | 1750690                | [G/A] | INTRON                |
| <i>OsMed15_1</i> | LOC_Os04g03860 | Os_chr04    | 1750682                | [T/C] | INTRON                |
| <i>OsMed15_1</i> | LOC_Os04g03860 | Os_chr04    | 1750642                | [C/T] | INTRON                |
| <i>OsMed15_1</i> | LOC_Os04g03860 | Os_chr04    | 1750580                | [A/C] | INTRON                |
| <i>OsMed15_1</i> | LOC_Os04g03860 | Os_chr04    | 1750554                | [T/C] | INTRON                |
| <i>OsMed15_1</i> | LOC_Os04g03860 | Os_chr04    | 1750512                | [G/A] | INTRON                |
| <i>OsMed15_1</i> | LOC_Os04g03860 | Os_chr04    | 1750489                | [A/G] | INTRON                |
| <i>OsMed15_1</i> | LOC_Os04g03860 | Os_chr04    | 1750447                | [C/T] | INTRON                |
| <i>OsMed15_1</i> | LOC_Os04g03860 | Os_chr04    | 1750411                | [T/A] | INTRON                |
| <i>OsMed15_1</i> | LOC_Os04g03860 | Os_chr04    | 1750348                | [G/A] | INTRON                |
| <i>OsMed15_1</i> | LOC_Os04g03860 | Os_chr04    | 1750339                | [G/A] | INTRON                |
| <i>OsMed15_1</i> | LOC_Os04g03860 | Os_chr04    | 1750321                | [G/C] | INTRON                |
| <i>OsMed15_1</i> | LOC_Os04g03860 | Os_chr04    | 1750307                | [A/C] | INTRON                |
| <i>OsMed15_1</i> | LOC_Os04g03860 | Os_chr04    | 1750303                | [T/C] | INTRON                |
| <i>OsMed15_1</i> | LOC_Os04g03860 | Os_chr04    | 1750269                | [T/A] | INTRON                |
| <i>OsMed15_1</i> | LOC_Os04g03860 | Os_chr04    | 1750255                | [A/G] | INTRON                |
| <i>OsMed15_1</i> | LOC_Os04g03860 | Os_chr04    | 1750251                | [C/G] | INTRON                |
| <i>OsMed15_1</i> | LOC_Os04g03860 | Os_chr04    | 1755149                | [C/A] | NON-SYNONYMOUS-CODING |
| <i>OsMed15_1</i> | LOC_Os04g03860 | Os_chr04    | 1755146                | [G/T] | NON-SYNONYMOUS-CODING |
| <i>OsMed15_1</i> | LOC_Os04g03860 | Os_chr04    | 1755144                | [A/G] | NON-SYNONYMOUS-CODING |
| <i>OsMed15_1</i> | LOC_Os04g03860 | Os_chr04    | 1755097                | [G/T] | NON-SYNONYMOUS-CODING |
| <i>OsMed15_1</i> | LOC_Os04g03860 | Os_chr04    | 1755057                | [G/A] | NON-SYNONYMOUS-CODING |
| <i>OsMed15_1</i> | LOC_Os04g03860 | Os_chr04    | 1755048                | [C/T] | NON-SYNONYMOUS-CODING |
| <i>OsMed15_1</i> | LOC_Os04g03860 | Os_chr04    | 1755000                | [G/A] | NON-SYNONYMOUS-CODING |
| <i>OsMed15_1</i> | LOC_Os04g03860 | Os_chr04    | 1754998                | [C/T] | NON-SYNONYMOUS-CODING |
| <i>OsMed15_1</i> | LOC_Os04g03860 | Os_chr04    | 1754979                | [C/T] | NON-SYNONYMOUS-CODING |
| <i>OsMed15_1</i> | LOC_Os04g03860 | Os_chr04    | 1754961                | [G/A] | NON-SYNONYMOUS-CODING |
| <i>OsMed15_1</i> | LOC_Os04g03860 | Os_chr04    | 1754635                | [C/G] | NON-SYNONYMOUS-CODING |
| <i>OsMed15_1</i> | LOC_Os04g03860 | Os_chr04    | 1754602                | [T/G] | NON-SYNONYMOUS-CODING |
| <i>OsMed15_1</i> | LOC_Os04g03860 | Os_chr04    | 1754596                | [A/T] | NON-SYNONYMOUS-CODING |
| <i>OsMed15_1</i> | LOC_Os04g03860 | Os_chr04    | 1754571                | [G/A] | NON-SYNONYMOUS-CODING |

| Mediator genes   | MSU locus ID   | Chromosomes | Physical Position (bp) | SNPs  | Structural Annotation |
|------------------|----------------|-------------|------------------------|-------|-----------------------|
| <i>OsMed15_1</i> | LOC_Os04g03860 | Os_chr04    | 1754523                | [A/T] | NON-SYNONYMOUS-CODING |
| <i>OsMed15_1</i> | LOC_Os04g03860 | Os_chr04    | 1754519                | [G/C] | NON-SYNONYMOUS-CODING |
| <i>OsMed15_1</i> | LOC_Os04g03860 | Os_chr04    | 1754505                | [G/A] | NON-SYNONYMOUS-CODING |
| <i>OsMed15_1</i> | LOC_Os04g03860 | Os_chr04    | 1754254                | [C/T] | NON-SYNONYMOUS-CODING |
| <i>OsMed15_1</i> | LOC_Os04g03860 | Os_chr04    | 1753866                | [C/T] | NON-SYNONYMOUS-CODING |
| <i>OsMed15_1</i> | LOC_Os04g03860 | Os_chr04    | 1753849                | [T/C] | NON-SYNONYMOUS-CODING |
| <i>OsMed15_1</i> | LOC_Os04g03860 | Os_chr04    | 1753779                | [C/G] | NON-SYNONYMOUS-CODING |
| <i>OsMed15_1</i> | LOC_Os04g03860 | Os_chr04    | 1753768                | [T/A] | NON-SYNONYMOUS-CODING |
| <i>OsMed15_1</i> | LOC_Os04g03860 | Os_chr04    | 1753762                | [C/A] | NON-SYNONYMOUS-CODING |
| <i>OsMed15_1</i> | LOC_Os04g03860 | Os_chr04    | 1753737                | [G/C] | NON-SYNONYMOUS-CODING |
| <i>OsMed15_1</i> | LOC_Os04g03860 | Os_chr04    | 1753656                | [G/A] | NON-SYNONYMOUS-CODING |
| <i>OsMed15_1</i> | LOC_Os04g03860 | Os_chr04    | 1753654                | [G/C] | NON-SYNONYMOUS-CODING |
| <i>OsMed15_1</i> | LOC_Os04g03860 | Os_chr04    | 1753650                | [G/A] | NON-SYNONYMOUS-CODING |
| <i>OsMed15_1</i> | LOC_Os04g03860 | Os_chr04    | 1753537                | [C/T] | NON-SYNONYMOUS-CODING |
| <i>OsMed15_1</i> | LOC_Os04g03860 | Os_chr04    | 1753510                | [T/G] | NON-SYNONYMOUS-CODING |
| <i>OsMed15_1</i> | LOC_Os04g03860 | Os_chr04    | 1753470                | [C/T] | NON-SYNONYMOUS-CODING |
| <i>OsMed15_1</i> | LOC_Os04g03860 | Os_chr04    | 1753444                | [C/T] | NON-SYNONYMOUS-CODING |
| <i>OsMed15_1</i> | LOC_Os04g03860 | Os_chr04    | 1753415                | [T/G] | NON-SYNONYMOUS-CODING |
| <i>OsMed15_1</i> | LOC_Os04g03860 | Os_chr04    | 1753380                | [G/A] | NON-SYNONYMOUS-CODING |
| <i>OsMed15_1</i> | LOC_Os04g03860 | Os_chr04    | 1753377                | [C/T] | NON-SYNONYMOUS-CODING |
| <i>OsMed15_1</i> | LOC_Os04g03860 | Os_chr04    | 1753318                | [C/T] | NON-SYNONYMOUS-CODING |
| <i>OsMed15_1</i> | LOC_Os04g03860 | Os_chr04    | 1753299                | [A/C] | NON-SYNONYMOUS-CODING |
| <i>OsMed15_1</i> | LOC_Os04g03860 | Os_chr04    | 1753240                | [T/C] | NON-SYNONYMOUS-CODING |
| <i>OsMed15_1</i> | LOC_Os04g03860 | Os_chr04    | 1753148                | [G/T] | NON-SYNONYMOUS-CODING |
| <i>OsMed15_1</i> | LOC_Os04g03860 | Os_chr04    | 1752774                | [G/T] | NON-SYNONYMOUS-CODING |
| <i>OsMed15_1</i> | LOC_Os04g03860 | Os_chr04    | 1752769                | [C/T] | NON-SYNONYMOUS-CODING |
| <i>OsMed15_1</i> | LOC_Os04g03860 | Os_chr04    | 1752689                | [A/G] | NON-SYNONYMOUS-CODING |
| <i>OsMed15_1</i> | LOC_Os04g03860 | Os_chr04    | 1752584                | [G/A] | NON-SYNONYMOUS-CODING |
| <i>OsMed15_1</i> | LOC_Os04g03860 | Os_chr04    | 1752583                | [C/T] | NON-SYNONYMOUS-CODING |
| <i>OsMed15_1</i> | LOC_Os04g03860 | Os_chr04    | 1752580                | [C/T] | NON-SYNONYMOUS-CODING |
| <i>OsMed15_1</i> | LOC_Os04g03860 | Os_chr04    | 1752574                | [G/A] | NON-SYNONYMOUS-CODING |
| <i>OsMed15_1</i> | LOC_Os04g03860 | Os_chr04    | 1752198                | [C/G] | NON-SYNONYMOUS-CODING |
| <i>OsMed15_1</i> | LOC_Os04g03860 | Os_chr04    | 1752043                | [G/C] | NON-SYNONYMOUS-CODING |
| <i>OsMed15_1</i> | LOC_Os04g03860 | Os_chr04    | 1752025                | [C/G] | NON-SYNONYMOUS-CODING |
| <i>OsMed15_1</i> | LOC_Os04g03860 | Os_chr04    | 1751996                | [C/T] | NON-SYNONYMOUS-CODING |
| <i>OsMed15_1</i> | LOC_Os04g03860 | Os_chr04    | 1751987                | [C/A] | NON-SYNONYMOUS-CODING |
| <i>OsMed15_1</i> | LOC_Os04g03860 | Os_chr04    | 1751950                | [C/A] | NON-SYNONYMOUS-CODING |
| <i>OsMed15_1</i> | LOC_Os04g03860 | Os_chr04    | 1751944                | [G/A] | NON-SYNONYMOUS-CODING |
| <i>OsMed15_1</i> | LOC_Os04g03860 | Os_chr04    | 1751936                | [G/A] | NON-SYNONYMOUS-CODING |
| <i>OsMed15_1</i> | LOC_Os04g03860 | Os_chr04    | 1751884                | [A/G] | NON-SYNONYMOUS-CODING |
| <i>OsMed15_1</i> | LOC_Os04g03860 | Os_chr04    | 1751804                | [T/C] | NON-SYNONYMOUS-CODING |
| <i>OsMed15_1</i> | LOC_Os04g03860 | Os_chr04    | 1751764                | [C/A] | NON-SYNONYMOUS-CODING |
| <i>OsMed15_1</i> | LOC_Os04g03860 | Os_chr04    | 1751748                | [G/T] | NON-SYNONYMOUS-CODING |
| <i>OsMed15_1</i> | LOC_Os04g03860 | Os_chr04    | 1751677                | [G/A] | NON-SYNONYMOUS-CODING |
| <i>OsMed15_1</i> | LOC_Os04g03860 | Os_chr04    | 1751560                | [T/C] | NON-SYNONYMOUS-CODING |
| <i>OsMed15_1</i> | LOC_Os04g03860 | Os_chr04    | 1751539                | [G/A] | NON-SYNONYMOUS-CODING |
| <i>OsMed15_1</i> | LOC_Os04g03860 | Os_chr04    | 1751536                | [A/G] | NON-SYNONYMOUS-CODING |

| Mediator genes   | MSU locus ID   | Chromosomes | Physical Position (bp) | SNPs  | Structural Annotation |
|------------------|----------------|-------------|------------------------|-------|-----------------------|
| <i>OsMed15_1</i> | LOC_Os04g03860 | Os_chr04    | 1751500                | [G/T] | NON-SYNONYMOUS-CODING |
| <i>OsMed15_1</i> | LOC_Os04g03860 | Os_chr04    | 1751483                | [A/G] | NON-SYNONYMOUS-CODING |
| <i>OsMed15_1</i> | LOC_Os04g03860 | Os_chr04    | 1751468                | [C/T] | NON-SYNONYMOUS-CODING |
| <i>OsMed15_1</i> | LOC_Os04g03860 | Os_chr04    | 1751416                | [G/A] | NON-SYNONYMOUS-CODING |
| <i>OsMed15_1</i> | LOC_Os04g03860 | Os_chr04    | 1751383                | [T/C] | NON-SYNONYMOUS-CODING |
| <i>OsMed15_1</i> | LOC_Os04g03860 | Os_chr04    | 1750983                | [G/T] | NON-SYNONYMOUS-CODING |
| <i>OsMed15_1</i> | LOC_Os04g03860 | Os_chr04    | 1750199                | [A/G] | NON-SYNONYMOUS-CODING |
| <i>OsMed15_1</i> | LOC_Os04g03860 | Os_chr04    | 1750179                | [T/C] | NON-SYNONYMOUS-CODING |
| <i>OsMed15_1</i> | LOC_Os04g03860 | Os_chr04    | 1750170                | [C/T] | NON-SYNONYMOUS-CODING |
| <i>OsMed15_1</i> | LOC_Os04g03860 | Os_chr04    | 1750165                | [G/A] | NON-SYNONYMOUS-CODING |
| <i>OsMed15_1</i> | LOC_Os04g03860 | Os_chr04    | 1750112                | [G/C] | NON-SYNONYMOUS-CODING |
| <i>OsMed15_1</i> | LOC_Os04g03860 | Os_chr04    | 1750052                | [A/T] | REGULATORY            |
| <i>OsMed15_1</i> | LOC_Os04g03860 | Os_chr04    | 1755128                | [G/C] | REGULATORY            |
| <i>OsMed15_1</i> | LOC_Os04g03860 | Os_chr04    | 1755434                | [T/C] | REGULATORY            |
| <i>OsMed15_1</i> | LOC_Os04g03860 | Os_chr04    | 1755423                | [A/G] | REGULATORY            |
| <i>OsMed15_1</i> | LOC_Os04g03860 | Os_chr04    | 1755415                | [C/T] | REGULATORY            |
| <i>OsMed15_1</i> | LOC_Os04g03860 | Os_chr04    | 1755404                | [G/A] | REGULATORY            |
| <i>OsMed15_1</i> | LOC_Os04g03860 | Os_chr04    | 1755365                | [T/C] | REGULATORY            |
| <i>OsMed15_1</i> | LOC_Os04g03860 | Os_chr04    | 1755341                | [G/C] | REGULATORY            |
| <i>OsMed15_1</i> | LOC_Os04g03860 | Os_chr04    | 1755311                | [A/T] | REGULATORY            |
| <i>OsMed15_1</i> | LOC_Os04g03860 | Os_chr04    | 1755284                | [G/A] | REGULATORY            |
| <i>OsMed15_1</i> | LOC_Os04g03860 | Os_chr04    | 1755200                | [T/C] | REGULATORY            |
| <i>OsMed15_1</i> | LOC_Os04g03860 | Os_chr04    | 1755181                | [G/A] | REGULATORY            |
| <i>OsMed15_1</i> | LOC_Os04g03860 | Os_chr04    | 1755174                | [C/G] | REGULATORY            |
| <i>OsMed15_1</i> | LOC_Os04g03860 | Os_chr04    | 1750027                | [C/T] | REGULATORY            |
| <i>OsMed15_1</i> | LOC_Os04g03860 | Os_chr04    | 1749984                | [T/C] | REGULATORY            |
| <i>OsMed15_1</i> | LOC_Os04g03860 | Os_chr04    | 1749967                | [C/T] | REGULATORY            |
| <i>OsMed15_1</i> | LOC_Os04g03860 | Os_chr04    | 1749964                | [G/A] | REGULATORY            |
| <i>OsMed15_1</i> | LOC_Os04g03860 | Os_chr04    | 1749955                | [G/A] | REGULATORY            |
| <i>OsMed15_1</i> | LOC_Os04g03860 | Os_chr04    | 1749901                | [T/C] | REGULATORY            |
| <i>OsMed15_1</i> | LOC_Os04g03860 | Os_chr04    | 1749838                | [C/A] | REGULATORY            |
| <i>OsMed15_1</i> | LOC_Os04g03860 | Os_chr04    | 1749832                | [A/G] | REGULATORY            |
| <i>OsMed15_1</i> | LOC_Os04g03860 | Os_chr04    | 1749819                | [C/T] | REGULATORY            |
| <i>OsMed15_1</i> | LOC_Os04g03860 | Os_chr04    | 1749799                | [G/C] | REGULATORY            |
| <i>OsMed15_1</i> | LOC_Os04g03860 | Os_chr04    | 1749785                | [A/T] | REGULATORY            |
| <i>OsMed15_1</i> | LOC_Os04g03860 | Os_chr04    | 1749740                | [C/T] | REGULATORY            |
| <i>OsMed15_1</i> | LOC_Os04g03860 | Os_chr04    | 1749720                | [G/A] | REGULATORY            |
| <i>OsMed15_1</i> | LOC_Os04g03860 | Os_chr04    | 1749719                | [C/T] | REGULATORY            |
| <i>OsMed15_1</i> | LOC_Os04g03860 | Os_chr04    | 1749710                | [G/A] | REGULATORY            |
| <i>OsMed15_1</i> | LOC_Os04g03860 | Os_chr04    | 1749701                | [T/C] | REGULATORY            |
| <i>OsMed15_1</i> | LOC_Os04g03860 | Os_chr04    | 1749693                | [C/A] | REGULATORY            |
| <i>OsMed15_1</i> | LOC_Os04g03860 | Os_chr04    | 1749679                | [G/A] | REGULATORY            |
| <i>OsMed15_1</i> | LOC_Os04g03860 | Os_chr04    | 1749668                | [G/A] | REGULATORY            |
| <i>OsMed15_1</i> | LOC_Os04g03860 | Os_chr04    | 1749618                | [C/A] | REGULATORY            |
| <i>OsMed15_1</i> | LOC_Os04g03860 | Os_chr04    | 1749599                | [T/C] | REGULATORY            |
| <i>OsMed15_1</i> | LOC_Os04g03860 | Os_chr04    | 1749568                | [C/T] | REGULATORY            |
| <i>OsMed15_1</i> | LOC_Os04g03860 | Os_chr04    | 1749553                | [T/C] | REGULATORY            |



| Mediator genes   | MSU locus ID   | Chromosomes | Physical Position (bp) | SNPs  | Structural Annotation |
|------------------|----------------|-------------|------------------------|-------|-----------------------|
| <i>OsMed15_1</i> | LOC_Os04g03860 | Os_chr04    | 1749551                | [T/C] | REGULATORY            |
| <i>OsMed15_1</i> | LOC_Os04g03860 | Os_chr04    | 1749540                | [C/T] | REGULATORY            |
| <i>OsMed15_1</i> | LOC_Os04g03860 | Os_chr04    | 1749533                | [C/T] | REGULATORY            |
| <i>OsMed15_1</i> | LOC_Os04g03860 | Os_chr04    | 1749515                | [G/A] | REGULATORY            |
| <i>OsMed15_1</i> | LOC_Os04g03860 | Os_chr04    | 1749506                | [C/T] | REGULATORY            |
| <i>OsMed15_1</i> | LOC_Os04g03860 | Os_chr04    | 1749501                | [C/T] | REGULATORY            |
| <i>OsMed15_1</i> | LOC_Os04g03860 | Os_chr04    | 1749500                | [A/G] | REGULATORY            |
| <i>OsMed15_1</i> | LOC_Os04g03860 | Os_chr04    | 1749486                | [G/A] | REGULATORY            |
| <i>OsMed15_1</i> | LOC_Os04g03860 | Os_chr04    | 1749460                | [A/T] | REGULATORY            |
| <i>OsMed15_1</i> | LOC_Os04g03860 | Os_chr04    | 1749457                | [G/A] | REGULATORY            |
| <i>OsMed15_1</i> | LOC_Os04g03860 | Os_chr04    | 1749451                | [T/A] | REGULATORY            |
| <i>OsMed15_1</i> | LOC_Os04g03860 | Os_chr04    | 1749423                | [C/T] | REGULATORY            |
| <i>OsMed15_1</i> | LOC_Os04g03860 | Os_chr04    | 1749418                | [A/C] | REGULATORY            |
| <i>OsMed15_1</i> | LOC_Os04g03860 | Os_chr04    | 1749414                | [C/T] | REGULATORY            |
| <i>OsMed15_1</i> | LOC_Os04g03860 | Os_chr04    | 1749413                | [A/G] | REGULATORY            |
| <i>OsMed15_1</i> | LOC_Os04g03860 | Os_chr04    | 1749399                | [C/T] | REGULATORY            |
| <i>OsMed15_1</i> | LOC_Os04g03860 | Os_chr04    | 1749389                | [A/C] | REGULATORY            |
| <i>OsMed15_1</i> | LOC_Os04g03860 | Os_chr04    | 1749386                | [G/T] | REGULATORY            |
| <i>OsMed15_1</i> | LOC_Os04g03860 | Os_chr04    | 1749376                | [C/G] | REGULATORY            |
| <i>OsMed15_1</i> | LOC_Os04g03860 | Os_chr04    | 1749356                | [T/C] | REGULATORY            |
| <i>OsMed15_1</i> | LOC_Os04g03860 | Os_chr04    | 1749347                | [T/A] | REGULATORY            |
| <i>OsMed15_1</i> | LOC_Os04g03860 | Os_chr04    | 1749330                | [C/T] | REGULATORY            |
| <i>OsMed15_1</i> | LOC_Os04g03860 | Os_chr04    | 1749323                | [G/A] | REGULATORY            |
| <i>OsMed15_1</i> | LOC_Os04g03860 | Os_chr04    | 1749319                | [T/C] | REGULATORY            |
| <i>OsMed15_1</i> | LOC_Os04g03860 | Os_chr04    | 1749306                | [A/C] | REGULATORY            |
| <i>OsMed15_1</i> | LOC_Os04g03860 | Os_chr04    | 1749277                | [G/A] | REGULATORY            |
| <i>OsMed15_1</i> | LOC_Os04g03860 | Os_chr04    | 1749261                | [A/T] | REGULATORY            |
| <i>OsMed15_1</i> | LOC_Os04g03860 | Os_chr04    | 1749253                | [T/A] | REGULATORY            |
| <i>OsMed15_1</i> | LOC_Os04g03860 | Os_chr04    | 1749242                | [A/T] | REGULATORY            |
| <i>OsMed15_1</i> | LOC_Os04g03860 | Os_chr04    | 1749241                | [A/T] | REGULATORY            |
| <i>OsMed15_1</i> | LOC_Os04g03860 | Os_chr04    | 1749199                | [A/G] | REGULATORY            |
| <i>OsMed15_1</i> | LOC_Os04g03860 | Os_chr04    | 1749151                | [A/G] | REGULATORY            |
| <i>OsMed15_1</i> | LOC_Os04g03860 | Os_chr04    | 1749131                | [T/C] | REGULATORY            |
| <i>OsMed15_1</i> | LOC_Os04g03860 | Os_chr04    | 1749094                | [C/T] | REGULATORY            |
| <i>OsMed15_1</i> | LOC_Os04g03860 | Os_chr04    | 1749077                | [G/A] | REGULATORY            |
| <i>OsMed15_1</i> | LOC_Os04g03860 | Os_chr04    | 1749059                | [G/A] | REGULATORY            |
| <i>OsMed15_1</i> | LOC_Os04g03860 | Os_chr04    | 1749049                | [C/T] | REGULATORY            |
| <i>OsMed15_1</i> | LOC_Os04g03860 | Os_chr04    | 1755089                | [A/G] | SYNONYMOUS-CODING     |
| <i>OsMed15_1</i> | LOC_Os04g03860 | Os_chr04    | 1755083                | [C/T] | SYNONYMOUS-CODING     |
| <i>OsMed15_1</i> | LOC_Os04g03860 | Os_chr04    | 1755074                | [T/C] | SYNONYMOUS-CODING     |
| <i>OsMed15_1</i> | LOC_Os04g03860 | Os_chr04    | 1755014                | [C/T] | SYNONYMOUS-CODING     |
| <i>OsMed15_1</i> | LOC_Os04g03860 | Os_chr04    | 1754975                | [C/T] | SYNONYMOUS-CODING     |
| <i>OsMed15_1</i> | LOC_Os04g03860 | Os_chr04    | 1754966                | [C/A] | SYNONYMOUS-CODING     |
| <i>OsMed15_1</i> | LOC_Os04g03860 | Os_chr04    | 1754963                | [C/T] | SYNONYMOUS-CODING     |
| <i>OsMed15_1</i> | LOC_Os04g03860 | Os_chr04    | 1754798                | [G/A] | SYNONYMOUS-CODING     |
| <i>OsMed15_1</i> | LOC_Os04g03860 | Os_chr04    | 1754789                | [G/A] | SYNONYMOUS-CODING     |
| <i>OsMed15_1</i> | LOC_Os04g03860 | Os_chr04    | 1754597                | [T/C] | SYNONYMOUS-CODING     |

| Mediator genes   | MSU locus ID   | Chromosomes | Physical Position (bp) | SNPs  | Structural Annotation |
|------------------|----------------|-------------|------------------------|-------|-----------------------|
| <i>OsMed15_1</i> | LOC_Os04g03860 | Os_chr04    | 1754570                | [C/T] | SYNONYMOUS-CODING     |
| <i>OsMed15_1</i> | LOC_Os04g03860 | Os_chr04    | 1754528                | [T/A] | SYNONYMOUS-CODING     |
| <i>OsMed15_1</i> | LOC_Os04g03860 | Os_chr04    | 1754483                | [A/C] | SYNONYMOUS-CODING     |
| <i>OsMed15_1</i> | LOC_Os04g03860 | Os_chr04    | 1754288                | [G/A] | SYNONYMOUS-CODING     |
| <i>OsMed15_1</i> | LOC_Os04g03860 | Os_chr04    | 1754198                | [T/G] | SYNONYMOUS-CODING     |
| <i>OsMed15_1</i> | LOC_Os04g03860 | Os_chr04    | 1753865                | [T/G] | SYNONYMOUS-CODING     |
| <i>OsMed15_1</i> | LOC_Os04g03860 | Os_chr04    | 1753850                | [G/T] | SYNONYMOUS-CODING     |
| <i>OsMed15_1</i> | LOC_Os04g03860 | Os_chr04    | 1753547                | [C/A] | SYNONYMOUS-CODING     |
| <i>OsMed15_1</i> | LOC_Os04g03860 | Os_chr04    | 1753499                | [C/G] | SYNONYMOUS-CODING     |
| <i>OsMed15_1</i> | LOC_Os04g03860 | Os_chr04    | 1753400                | [T/C] | SYNONYMOUS-CODING     |
| <i>OsMed15_1</i> | LOC_Os04g03860 | Os_chr04    | 1753319                | [A/G] | SYNONYMOUS-CODING     |
| <i>OsMed15_1</i> | LOC_Os04g03860 | Os_chr04    | 1753298                | [T/C] | SYNONYMOUS-CODING     |
| <i>OsMed15_1</i> | LOC_Os04g03860 | Os_chr04    | 1753256                | [T/A] | SYNONYMOUS-CODING     |
| <i>OsMed15_1</i> | LOC_Os04g03860 | Os_chr04    | 1753223                | [T/C] | SYNONYMOUS-CODING     |
| <i>OsMed15_1</i> | LOC_Os04g03860 | Os_chr04    | 1753187                | [A/C] | SYNONYMOUS-CODING     |
| <i>OsMed15_1</i> | LOC_Os04g03860 | Os_chr04    | 1752777                | [A/T] | SYNONYMOUS-CODING     |
| <i>OsMed15_1</i> | LOC_Os04g03860 | Os_chr04    | 1752693                | [G/A] | SYNONYMOUS-CODING     |
| <i>OsMed15_1</i> | LOC_Os04g03860 | Os_chr04    | 1752455                | [A/G] | SYNONYMOUS-CODING     |
| <i>OsMed15_1</i> | LOC_Os04g03860 | Os_chr04    | 1752243                | [G/A] | SYNONYMOUS-CODING     |
| <i>OsMed15_1</i> | LOC_Os04g03860 | Os_chr04    | 1752216                | [G/C] | SYNONYMOUS-CODING     |
| <i>OsMed15_1</i> | LOC_Os04g03860 | Os_chr04    | 1751997                | [G/A] | SYNONYMOUS-CODING     |
| <i>OsMed15_1</i> | LOC_Os04g03860 | Os_chr04    | 1751973                | [A/C] | SYNONYMOUS-CODING     |
| <i>OsMed15_1</i> | LOC_Os04g03860 | Os_chr04    | 1751961                | [G/A] | SYNONYMOUS-CODING     |
| <i>OsMed15_1</i> | LOC_Os04g03860 | Os_chr04    | 1751868                | [G/A] | SYNONYMOUS-CODING     |
| <i>OsMed15_1</i> | LOC_Os04g03860 | Os_chr04    | 1751814                | [G/A] | SYNONYMOUS-CODING     |
| <i>OsMed15_1</i> | LOC_Os04g03860 | Os_chr04    | 1751808                | [G/A] | SYNONYMOUS-CODING     |
| <i>OsMed15_1</i> | LOC_Os04g03860 | Os_chr04    | 1751790                | [A/G] | SYNONYMOUS-CODING     |
| <i>OsMed15_1</i> | LOC_Os04g03860 | Os_chr04    | 1751667                | [T/C] | SYNONYMOUS-CODING     |
| <i>OsMed15_1</i> | LOC_Os04g03860 | Os_chr04    | 1751628                | [T/A] | SYNONYMOUS-CODING     |
| <i>OsMed15_1</i> | LOC_Os04g03860 | Os_chr04    | 1751454                | [C/T] | SYNONYMOUS-CODING     |
| <i>OsMed15_1</i> | LOC_Os04g03860 | Os_chr04    | 1751442                | [A/G] | SYNONYMOUS-CODING     |
| <i>OsMed15_1</i> | LOC_Os04g03860 | Os_chr04    | 1751433                | [C/T] | SYNONYMOUS-CODING     |
| <i>OsMed15_1</i> | LOC_Os04g03860 | Os_chr04    | 1751409                | [A/G] | SYNONYMOUS-CODING     |
| <i>OsMed15_1</i> | LOC_Os04g03860 | Os_chr04    | 1751337                | [A/G] | SYNONYMOUS-CODING     |
| <i>OsMed15_1</i> | LOC_Os04g03860 | Os_chr04    | 1750986                | [C/T] | SYNONYMOUS-CODING     |
| <i>OsMed15_1</i> | LOC_Os04g03860 | Os_chr04    | 1750968                | [T/G] | SYNONYMOUS-CODING     |
| <i>OsMed15_1</i> | LOC_Os04g03860 | Os_chr04    | 1750150                | [C/T] | SYNONYMOUS-CODING     |
| <i>OsMed15_1</i> | LOC_Os04g03860 | Os_chr04    | 1750144                | [C/T] | SYNONYMOUS-CODING     |
| <i>OsMed15_2</i> | LOC_Os08g45080 | Os_chr08    | 28301886               | [G/A] | INTRON                |
| <i>OsMed15_2</i> | LOC_Os08g45080 | Os_chr08    | 28301765               | [G/A] | INTRON                |
| <i>OsMed15_2</i> | LOC_Os08g45080 | Os_chr08    | 28301309               | [G/A] | INTRON                |
| <i>OsMed15_2</i> | LOC_Os08g45080 | Os_chr08    | 28300846               | [C/A] | INTRON                |
| <i>OsMed15_2</i> | LOC_Os08g45080 | Os_chr08    | 28300620               | [A/T] | INTRON                |
| <i>OsMed15_2</i> | LOC_Os08g45080 | Os_chr08    | 28299532               | [C/A] | INTRON                |
| <i>OsMed15_2</i> | LOC_Os08g45080 | Os_chr08    | 28299339               | [T/G] | INTRON                |
| <i>OsMed15_2</i> | LOC_Os08g45080 | Os_chr08    | 28299324               | [G/T] | INTRON                |
| <i>OsMed15_2</i> | LOC_Os08g45080 | Os_chr08    | 28299288               | [G/A] | INTRON                |

| Mediator genes   | MSU locus ID   | Chromosomes | Physical Position (bp) | SNPs  | Structural Annotation |
|------------------|----------------|-------------|------------------------|-------|-----------------------|
| <i>OsMed15_2</i> | LOC_Os08g45080 | Os_chr08    | 28299215               | [C/G] | INTRON                |
| <i>OsMed15_2</i> | LOC_Os08g45080 | Os_chr08    | 28299143               | [T/A] | INTRON                |
| <i>OsMed15_2</i> | LOC_Os08g45080 | Os_chr08    | 28297623               | [A/G] | INTRON                |
| <i>OsMed15_2</i> | LOC_Os08g45080 | Os_chr08    | 28297413               | [A/G] | INTRON                |
| <i>OsMed15_2</i> | LOC_Os08g45080 | Os_chr08    | 28297077               | [A/T] | INTRON                |
| <i>OsMed15_2</i> | LOC_Os08g45080 | Os_chr08    | 28296985               | [G/A] | INTRON                |
| <i>OsMed15_2</i> | LOC_Os08g45080 | Os_chr08    | 28296692               | [G/A] | INTRON                |
| <i>OsMed15_2</i> | LOC_Os08g45080 | Os_chr08    | 28296686               | [A/G] | INTRON                |
| <i>OsMed15_2</i> | LOC_Os08g45080 | Os_chr08    | 28296493               | [T/G] | INTRON                |
| <i>OsMed15_2</i> | LOC_Os08g45080 | Os_chr08    | 28296401               | [A/C] | INTRON                |
| <i>OsMed15_2</i> | LOC_Os08g45080 | Os_chr08    | 28296369               | [C/A] | INTRON                |
| <i>OsMed15_2</i> | LOC_Os08g45080 | Os_chr08    | 28296274               | [A/C] | INTRON                |
| <i>OsMed15_2</i> | LOC_Os08g45080 | Os_chr08    | 28296258               | [T/G] | INTRON                |
| <i>OsMed15_2</i> | LOC_Os08g45080 | Os_chr08    | 28294599               | [A/G] | INTRON                |
| <i>OsMed15_2</i> | LOC_Os08g45080 | Os_chr08    | 28294542               | [C/T] | INTRON                |
| <i>OsMed15_2</i> | LOC_Os08g45080 | Os_chr08    | 28294446               | [T/C] | INTRON                |
| <i>OsMed15_2</i> | LOC_Os08g45080 | Os_chr08    | 28294391               | [G/A] | INTRON                |
| <i>OsMed15_2</i> | LOC_Os08g45080 | Os_chr08    | 28294098               | [G/T] | INTRON                |
| <i>OsMed15_2</i> | LOC_Os08g45080 | Os_chr08    | 28293425               | [G/T] | INTRON                |
| <i>OsMed15_2</i> | LOC_Os08g45080 | Os_chr08    | 28302391               | [G/A] | NON-SYNONYMOUS-CODING |
| <i>OsMed15_2</i> | LOC_Os08g45080 | Os_chr08    | 28298893               | [G/T] | NON-SYNONYMOUS-CODING |
| <i>OsMed15_2</i> | LOC_Os08g45080 | Os_chr08    | 28296090               | [A/T] | NON-SYNONYMOUS-CODING |
| <i>OsMed15_2</i> | LOC_Os08g45080 | Os_chr08    | 28296070               | [C/T] | NON-SYNONYMOUS-CODING |
| <i>OsMed15_2</i> | LOC_Os08g45080 | Os_chr08    | 28295962               | [T/C] | NON-SYNONYMOUS-CODING |
| <i>OsMed15_2</i> | LOC_Os08g45080 | Os_chr08    | 28295611               | [C/T] | NON-SYNONYMOUS-CODING |
| <i>OsMed15_2</i> | LOC_Os08g45080 | Os_chr08    | 28295573               | [T/C] | NON-SYNONYMOUS-CODING |
| <i>OsMed15_2</i> | LOC_Os08g45080 | Os_chr08    | 28295193               | [G/C] | NON-SYNONYMOUS-CODING |
| <i>OsMed15_2</i> | LOC_Os08g45080 | Os_chr08    | 28294801               | [G/T] | NON-SYNONYMOUS-CODING |
| <i>OsMed15_2</i> | LOC_Os08g45080 | Os_chr08    | 28292523               | [G/T] | REGULATORY            |
| <i>OsMed15_2</i> | LOC_Os08g45080 | Os_chr08    | 28292455               | [G/A] | REGULATORY            |
| <i>OsMed15_2</i> | LOC_Os08g45080 | Os_chr08    | 28303580               | [G/A] | REGULATORY            |
| <i>OsMed15_2</i> | LOC_Os08g45080 | Os_chr08    | 28303382               | [C/T] | REGULATORY            |
| <i>OsMed15_2</i> | LOC_Os08g45080 | Os_chr08    | 28303346               | [C/T] | REGULATORY            |
| <i>OsMed15_2</i> | LOC_Os08g45080 | Os_chr08    | 28303272               | [G/C] | REGULATORY            |
| <i>OsMed15_2</i> | LOC_Os08g45080 | Os_chr08    | 28303241               | [C/T] | REGULATORY            |
| <i>OsMed15_2</i> | LOC_Os08g45080 | Os_chr08    | 28303222               | [G/A] | REGULATORY            |
| <i>OsMed15_2</i> | LOC_Os08g45080 | Os_chr08    | 28303039               | [C/T] | REGULATORY            |
| <i>OsMed15_2</i> | LOC_Os08g45080 | Os_chr08    | 28303021               | [C/A] | REGULATORY            |
| <i>OsMed15_2</i> | LOC_Os08g45080 | Os_chr08    | 28302838               | [C/A] | REGULATORY            |
| <i>OsMed15_2</i> | LOC_Os08g45080 | Os_chr08    | 28302790               | [A/G] | REGULATORY            |
| <i>OsMed15_2</i> | LOC_Os08g45080 | Os_chr08    | 28302749               | [C/T] | REGULATORY            |
| <i>OsMed15_2</i> | LOC_Os08g45080 | Os_chr08    | 28302685               | [T/G] | REGULATORY            |
| <i>OsMed15_2</i> | LOC_Os08g45080 | Os_chr08    | 28298097               | [C/T] | SYNONYMOUS-CODING     |
| <i>OsMed15_2</i> | LOC_Os08g45080 | Os_chr08    | 28295397               | [C/T] | SYNONYMOUS-CODING     |
| <i>OsMed15_2</i> | LOC_Os08g45080 | Os_chr08    | 28295283               | [G/A] | SYNONYMOUS-CODING     |
| <i>OsMed15_2</i> | LOC_Os08g45080 | Os_chr08    | 28293691               | [A/G] | SYNONYMOUS-CODING     |
| <i>OsMed16_1</i> | LOC_Os10g35560 | Os_chr10    | 18953375               | [A/T] | INTRON                |

| Mediator genes   | MSU locus ID   | Chromosomes | Physical Position (bp) | SNPs  | Structural Annotation |
|------------------|----------------|-------------|------------------------|-------|-----------------------|
| <i>OsMed16_1</i> | LOC_Os10g35560 | Os_chr10    | 18953353               | [G/T] | INTRON                |
| <i>OsMed16_1</i> | LOC_Os10g35560 | Os_chr10    | 18952770               | [C/T] | INTRON                |
| <i>OsMed16_1</i> | LOC_Os10g35560 | Os_chr10    | 18952667               | [A/T] | INTRON                |
| <i>OsMed16_1</i> | LOC_Os10g35560 | Os_chr10    | 18952534               | [C/A] | INTRON                |
| <i>OsMed16_1</i> | LOC_Os10g35560 | Os_chr10    | 18952191               | [C/T] | INTRON                |
| <i>OsMed16_1</i> | LOC_Os10g35560 | Os_chr10    | 18952078               | [C/A] | INTRON                |
| <i>OsMed16_1</i> | LOC_Os10g35560 | Os_chr10    | 18951904               | [G/A] | INTRON                |
| <i>OsMed16_1</i> | LOC_Os10g35560 | Os_chr10    | 18951224               | [A/T] | INTRON                |
| <i>OsMed16_1</i> | LOC_Os10g35560 | Os_chr10    | 18950953               | [G/A] | INTRON                |
| <i>OsMed16_1</i> | LOC_Os10g35560 | Os_chr10    | 18950874               | [C/T] | INTRON                |
| <i>OsMed16_1</i> | LOC_Os10g35560 | Os_chr10    | 18950792               | [C/G] | INTRON                |
| <i>OsMed16_1</i> | LOC_Os10g35560 | Os_chr10    | 18950740               | [G/A] | INTRON                |
| <i>OsMed16_1</i> | LOC_Os10g35560 | Os_chr10    | 18950667               | [G/A] | INTRON                |
| <i>OsMed16_1</i> | LOC_Os10g35560 | Os_chr10    | 18950286               | [G/C] | INTRON                |
| <i>OsMed16_1</i> | LOC_Os10g35560 | Os_chr10    | 18950209               | [T/C] | INTRON                |
| <i>OsMed16_1</i> | LOC_Os10g35560 | Os_chr10    | 18950138               | [A/T] | INTRON                |
| <i>OsMed16_1</i> | LOC_Os10g35560 | Os_chr10    | 18950136               | [G/T] | INTRON                |
| <i>OsMed16_1</i> | LOC_Os10g35560 | Os_chr10    | 18950059               | [G/T] | INTRON                |
| <i>OsMed16_1</i> | LOC_Os10g35560 | Os_chr10    | 18950002               | [C/T] | INTRON                |
| <i>OsMed16_1</i> | LOC_Os10g35560 | Os_chr10    | 18949599               | [G/C] | INTRON                |
| <i>OsMed16_1</i> | LOC_Os10g35560 | Os_chr10    | 18949541               | [C/A] | INTRON                |
| <i>OsMed16_1</i> | LOC_Os10g35560 | Os_chr10    | 18949231               | [T/C] | INTRON                |
| <i>OsMed16_1</i> | LOC_Os10g35560 | Os_chr10    | 18948997               | [T/C] | INTRON                |
| <i>OsMed16_1</i> | LOC_Os10g35560 | Os_chr10    | 18948162               | [G/A] | INTRON                |
| <i>OsMed16_1</i> | LOC_Os10g35560 | Os_chr10    | 18948039               | [T/C] | INTRON                |
| <i>OsMed16_1</i> | LOC_Os10g35560 | Os_chr10    | 18947903               | [C/T] | INTRON                |
| <i>OsMed16_1</i> | LOC_Os10g35560 | Os_chr10    | 18946985               | [C/G] | INTRON                |
| <i>OsMed16_1</i> | LOC_Os10g35560 | Os_chr10    | 18946414               | [C/T] | INTRON                |
| <i>OsMed16_1</i> | LOC_Os10g35560 | Os_chr10    | 18946254               | [T/A] | INTRON                |
| <i>OsMed16_1</i> | LOC_Os10g35560 | Os_chr10    | 18946240               | [A/C] | INTRON                |
| <i>OsMed16_1</i> | LOC_Os10g35560 | Os_chr10    | 18946203               | [C/A] | INTRON                |
| <i>OsMed16_1</i> | LOC_Os10g35560 | Os_chr10    | 18946139               | [T/G] | INTRON                |
| <i>OsMed16_1</i> | LOC_Os10g35560 | Os_chr10    | 18945730               | [T/G] | INTRON                |
| <i>OsMed16_1</i> | LOC_Os10g35560 | Os_chr10    | 18945604               | [C/A] | INTRON                |
| <i>OsMed16_1</i> | LOC_Os10g35560 | Os_chr10    | 18953637               | [T/G] | INTRON                |
| <i>OsMed16_1</i> | LOC_Os10g35560 | Os_chr10    | 18953601               | [G/A] | INTRON                |
| <i>OsMed16_1</i> | LOC_Os10g35560 | Os_chr10    | 18953136               | [T/A] | NON-SYNONYMOUS-CODING |
| <i>OsMed16_1</i> | LOC_Os10g35560 | Os_chr10    | 18953068               | [T/C] | NON-SYNONYMOUS-CODING |
| <i>OsMed16_1</i> | LOC_Os10g35560 | Os_chr10    | 18952302               | [G/A] | NON-SYNONYMOUS-CODING |
| <i>OsMed16_1</i> | LOC_Os10g35560 | Os_chr10    | 18951789               | [G/A] | NON-SYNONYMOUS-CODING |
| <i>OsMed16_1</i> | LOC_Os10g35560 | Os_chr10    | 18951385               | [G/A] | NON-SYNONYMOUS-CODING |
| <i>OsMed16_1</i> | LOC_Os10g35560 | Os_chr10    | 18950508               | [A/G] | NON-SYNONYMOUS-CODING |
| <i>OsMed16_1</i> | LOC_Os10g35560 | Os_chr10    | 18948514               | [C/T] | NON-SYNONYMOUS-CODING |
| <i>OsMed16_1</i> | LOC_Os10g35560 | Os_chr10    | 18947740               | [G/A] | NON-SYNONYMOUS-CODING |
| <i>OsMed16_1</i> | LOC_Os10g35560 | Os_chr10    | 18947704               | [A/C] | NON-SYNONYMOUS-CODING |
| <i>OsMed16_1</i> | LOC_Os10g35560 | Os_chr10    | 18947196               | [G/A] | NON-SYNONYMOUS-CODING |
| <i>OsMed16_1</i> | LOC_Os10g35560 | Os_chr10    | 18953944               | [A/G] | REGULATORY            |

| Mediator genes   | MSU locus ID   | Chromosomes | Physical Position (bp) | SNPs  | Structural Annotation |
|------------------|----------------|-------------|------------------------|-------|-----------------------|
| <i>OsMed16_1</i> | LOC_Os10g35560 | Os_chr10    | 18953856               | [T/C] | REGULATORY            |
| <i>OsMed16_1</i> | LOC_Os10g35560 | Os_chr10    | 18953844               | [A/C] | REGULATORY            |
| <i>OsMed16_1</i> | LOC_Os10g35560 | Os_chr10    | 18953288               | [C/T] | SYNONYMOUS-CODING     |
| <i>OsMed16_1</i> | LOC_Os10g35560 | Os_chr10    | 18953057               | [A/T] | SYNONYMOUS-CODING     |
| <i>OsMed16_1</i> | LOC_Os10g35560 | Os_chr10    | 18952391               | [C/T] | SYNONYMOUS-CODING     |
| <i>OsMed16_1</i> | LOC_Os10g35560 | Os_chr10    | 18952298               | [A/C] | SYNONYMOUS-CODING     |
| <i>OsMed16_1</i> | LOC_Os10g35560 | Os_chr10    | 18951650               | [T/C] | SYNONYMOUS-CODING     |
| <i>OsMed16_1</i> | LOC_Os10g35560 | Os_chr10    | 18950489               | [G/A] | SYNONYMOUS-CODING     |
| <i>OsMed16_1</i> | LOC_Os10g35560 | Os_chr10    | 18949061               | [A/G] | SYNONYMOUS-CODING     |
| <i>OsMed16_1</i> | LOC_Os10g35560 | Os_chr10    | 18947200               | [A/G] | SYNONYMOUS-CODING     |
| <i>OsMed16_1</i> | LOC_Os10g35560 | Os_chr10    | 18944275               | [A/T] | REGULATORY            |
| <i>OsMed16_1</i> | LOC_Os10g35560 | Os_chr10    | 18944253               | [G/C] | REGULATORY            |
| <i>OsMed16_1</i> | LOC_Os10g35560 | Os_chr10    | 18944223               | [A/T] | REGULATORY            |
| <i>OsMed16_1</i> | LOC_Os10g35560 | Os_chr10    | 18944193               | [G/A] | REGULATORY            |
| <i>OsMed16_1</i> | LOC_Os10g35560 | Os_chr10    | 18944176               | [A/G] | REGULATORY            |
| <i>OsMed16_1</i> | LOC_Os10g35560 | Os_chr10    | 18944167               | [G/A] | REGULATORY            |
| <i>OsMed16_1</i> | LOC_Os10g35560 | Os_chr10    | 18944166               | [C/T] | REGULATORY            |
| <i>OsMed16_1</i> | LOC_Os10g35560 | Os_chr10    | 18944159               | [G/A] | REGULATORY            |
| <i>OsMed16_1</i> | LOC_Os10g35560 | Os_chr10    | 18944127               | [A/G] | REGULATORY            |
| <i>OsMed16_1</i> | LOC_Os10g35560 | Os_chr10    | 18944122               | [G/T] | REGULATORY            |
| <i>OsMed16_1</i> | LOC_Os10g35560 | Os_chr10    | 18944099               | [T/C] | REGULATORY            |
| <i>OsMed16_1</i> | LOC_Os10g35560 | Os_chr10    | 18944071               | [G/A] | REGULATORY            |
| <i>OsMed16_1</i> | LOC_Os10g35560 | Os_chr10    | 18944070               | [T/G] | REGULATORY            |
| <i>OsMed16_1</i> | LOC_Os10g35560 | Os_chr10    | 18944021               | [G/A] | REGULATORY            |
| <i>OsMed16_1</i> | LOC_Os10g35560 | Os_chr10    | 18944017               | [A/T] | REGULATORY            |
| <i>OsMed16_1</i> | LOC_Os10g35560 | Os_chr10    | 18943990               | [C/T] | REGULATORY            |
| <i>OsMed16_1</i> | LOC_Os10g35560 | Os_chr10    | 18943935               | [C/T] | REGULATORY            |
| <i>OsMed16_1</i> | LOC_Os10g35560 | Os_chr10    | 18943893               | [A/G] | REGULATORY            |
| <i>OsMed16_1</i> | LOC_Os10g35560 | Os_chr10    | 18943825               | [G/A] | REGULATORY            |
| <i>OsMed16_1</i> | LOC_Os10g35560 | Os_chr10    | 18943630               | [G/A] | REGULATORY            |
| <i>OsMed16_1</i> | LOC_Os10g35560 | Os_chr10    | 18943547               | [C/A] | REGULATORY            |
| <i>OsMed16_1</i> | LOC_Os10g35560 | Os_chr10    | 18943468               | [G/T] | REGULATORY            |
| <i>OsMed17_1</i> | LOC_Os12g44140 | Os_chr12    | 27348405               | [C/T] | INTRON                |
| <i>OsMed17_1</i> | LOC_Os12g44140 | Os_chr12    | 27348273               | [G/T] | INTRON                |
| <i>OsMed17_1</i> | LOC_Os12g44140 | Os_chr12    | 27348157               | [C/T] | INTRON                |
| <i>OsMed17_1</i> | LOC_Os12g44140 | Os_chr12    | 27348147               | [T/A] | INTRON                |
| <i>OsMed17_1</i> | LOC_Os12g44140 | Os_chr12    | 27347988               | [C/T] | INTRON                |
| <i>OsMed17_1</i> | LOC_Os12g44140 | Os_chr12    | 27346916               | [C/T] | INTRON                |
| <i>OsMed17_1</i> | LOC_Os12g44140 | Os_chr12    | 27346805               | [A/G] | INTRON                |
| <i>OsMed17_1</i> | LOC_Os12g44140 | Os_chr12    | 27346347               | [C/T] | INTRON                |
| <i>OsMed17_1</i> | LOC_Os12g44140 | Os_chr12    | 27346046               | [G/A] | INTRON                |
| <i>OsMed17_1</i> | LOC_Os12g44140 | Os_chr12    | 27347597               | [C/T] | NON-SYNONYMOUS-CODING |
| <i>OsMed17_1</i> | LOC_Os12g44140 | Os_chr12    | 27347155               | [G/A] | NON-SYNONYMOUS-CODING |
| <i>OsMed17_1</i> | LOC_Os12g44140 | Os_chr12    | 27346498               | [T/C] | NON-SYNONYMOUS-CODING |
| <i>OsMed17_1</i> | LOC_Os12g44140 | Os_chr12    | 27345321               | [C/T] | REGULATORY            |
| <i>OsMed17_1</i> | LOC_Os12g44140 | Os_chr12    | 27345439               | [T/C] | REGULATORY            |
| <i>OsMed17_1</i> | LOC_Os12g44140 | Os_chr12    | 27345307               | [A/C] | REGULATORY            |

| Mediator genes   | MSU locus ID   | Chromosomes | Physical Position (bp) | SNPs  | Structural Annotation |
|------------------|----------------|-------------|------------------------|-------|-----------------------|
| <i>OsMed17_1</i> | LOC_Os12g44140 | Os_chr12    | 27345222               | [A/C] | REGULATORY            |
| <i>OsMed17_1</i> | LOC_Os12g44140 | Os_chr12    | 27345141               | [T/G] | REGULATORY            |
| <i>OsMed17_1</i> | LOC_Os12g44140 | Os_chr12    | 27345105               | [A/C] | REGULATORY            |
| <i>OsMed17_1</i> | LOC_Os12g44140 | Os_chr12    | 27344905               | [G/A] | REGULATORY            |
| <i>OsMed17_1</i> | LOC_Os12g44140 | Os_chr12    | 27344757               | [A/C] | REGULATORY            |
| <i>OsMed17_1</i> | LOC_Os12g44140 | Os_chr12    | 27344734               | [C/T] | REGULATORY            |
| <i>OsMed17_1</i> | LOC_Os12g44140 | Os_chr12    | 27344710               | [C/T] | REGULATORY            |
| <i>OsMed17_1</i> | LOC_Os12g44140 | Os_chr12    | 27344439               | [G/A] | REGULATORY            |
| <i>OsMed17_1</i> | LOC_Os12g44140 | Os_chr12    | 27348569               | [G/T] | SYNONYMOUS-CODING     |
| <i>OsMed17_1</i> | LOC_Os12g44140 | Os_chr12    | 27348557               | [T/C] | SYNONYMOUS-CODING     |
| <i>OsMed17_1</i> | LOC_Os12g44140 | Os_chr12    | 27347328               | [C/T] | SYNONYMOUS-CODING     |
| <i>OsMed17_1</i> | LOC_Os12g44140 | Os_chr12    | 27345765               | [C/T] | SYNONYMOUS-CODING     |
| <i>OsMed17_1</i> | LOC_Os12g44140 | Os_chr12    | 27345762               | [G/A] | SYNONYMOUS-CODING     |
| <i>OsMed17_1</i> | LOC_Os12g44140 | Os_chr12    | 27345666               | [C/A] | SYNONYMOUS-CODING     |
| <i>OsMed18_1</i> | LOC_Os02g10050 | Os_chr02    | 5230471                | [T/C] | INTRON                |
| <i>OsMed18_1</i> | LOC_Os02g10050 | Os_chr02    | 5230122                | [G/A] | INTRON                |
| <i>OsMed18_1</i> | LOC_Os02g10050 | Os_chr02    | 5230060                | [C/A] | INTRON                |
| <i>OsMed18_1</i> | LOC_Os02g10050 | Os_chr02    | 5229794                | [C/T] | INTRON                |
| <i>OsMed18_1</i> | LOC_Os02g10050 | Os_chr02    | 5229681                | [A/G] | INTRON                |
| <i>OsMed18_1</i> | LOC_Os02g10050 | Os_chr02    | 5229638                | [T/C] | INTRON                |
| <i>OsMed18_1</i> | LOC_Os02g10050 | Os_chr02    | 5229478                | [T/C] | INTRON                |
| <i>OsMed18_1</i> | LOC_Os02g10050 | Os_chr02    | 5229462                | [G/A] | INTRON                |
| <i>OsMed18_1</i> | LOC_Os02g10050 | Os_chr02    | 5228954                | [G/A] | INTRON                |
| <i>OsMed18_1</i> | LOC_Os02g10050 | Os_chr02    | 5231082                | [G/A] | NON-SYNONYMOUS-CODING |
| <i>OsMed18_1</i> | LOC_Os02g10050 | Os_chr02    | 5230741                | [G/A] | NON-SYNONYMOUS-CODING |
| <i>OsMed18_1</i> | LOC_Os02g10050 | Os_chr02    | 5230709                | [G/A] | NON-SYNONYMOUS-CODING |
| <i>OsMed18_1</i> | LOC_Os02g10050 | Os_chr02    | 5228823                | [G/A] | REGULATORY            |
| <i>OsMed18_1</i> | LOC_Os02g10050 | Os_chr02    | 5231256                | [A/G] | REGULATORY            |
| <i>OsMed18_1</i> | LOC_Os02g10050 | Os_chr02    | 5231185                | [T/C] | REGULATORY            |
| <i>OsMed18_1</i> | LOC_Os02g10050 | Os_chr02    | 5231166                | [G/T] | REGULATORY            |
| <i>OsMed18_1</i> | LOC_Os02g57590 | Os_chr02    | 5228677                | [C/A] | REGULATORY            |
| <i>OsMed18_1</i> | LOC_Os02g57590 | Os_chr02    | 5228633                | [C/A] | REGULATORY            |
| <i>OsMed18_1</i> | LOC_Os02g57590 | Os_chr02    | 5228547                | [G/T] | REGULATORY            |
| <i>OsMed18_1</i> | LOC_Os02g57590 | Os_chr02    | 5228208                | [G/A] | REGULATORY            |
| <i>OsMed18_1</i> | LOC_Os02g57590 | Os_chr02    | 5228147                | [A/G] | REGULATORY            |
| <i>OsMed18_1</i> | LOC_Os02g57590 | Os_chr02    | 5228086                | [G/A] | REGULATORY            |
| <i>OsMed18_1</i> | LOC_Os02g57590 | Os_chr02    | 5228046                | [C/A] | REGULATORY            |
| <i>OsMed18_1</i> | LOC_Os02g57590 | Os_chr02    | 5228040                | [G/A] | REGULATORY            |
| <i>OsMed18_1</i> | LOC_Os02g57590 | Os_chr02    | 5228034                | [G/A] | REGULATORY            |
| <i>OsMed18_1</i> | LOC_Os02g57590 | Os_chr02    | 5228016                | [G/A] | REGULATORY            |
| <i>OsMed18_1</i> | LOC_Os02g10050 | Os_chr02    | 5231036                | [G/A] | SYNONYMOUS-CODING     |
| <i>OsMed18_1</i> | LOC_Os02g10050 | Os_chr02    | 5230869                | [C/T] | SYNONYMOUS-CODING     |
| <i>OsMed18_1</i> | LOC_Os02g10050 | Os_chr02    | 5230642                | [T/C] | SYNONYMOUS-CODING     |
| <i>OsMed19_1</i> | LOC_Os03g44010 | Os_chr03    | 24729679               | [G/A] | INTRON                |
| <i>OsMed19_1</i> | LOC_Os03g44010 | Os_chr03    | 24729295               | [A/G] | INTRON                |
| <i>OsMed19_1</i> | LOC_Os03g44010 | Os_chr03    | 24728994               | [T/C] | INTRON                |
| <i>OsMed19_1</i> | LOC_Os03g44010 | Os_chr03    | 24728982               | [T/G] | INTRON                |

| Mediator genes   | MSU locus ID   | Chromosomes | Physical Position (bp) | SNPs  | Structural Annotation |
|------------------|----------------|-------------|------------------------|-------|-----------------------|
| <i>OsMed19_1</i> | LOC_Os03g44010 | Os_chr03    | 24728915               | [G/A] | INTRON                |
| <i>OsMed19_1</i> | LOC_Os03g44010 | Os_chr03    | 24728836               | [A/G] | INTRON                |
| <i>OsMed19_1</i> | LOC_Os03g44010 | Os_chr03    | 24728499               | [A/G] | INTRON                |
| <i>OsMed19_1</i> | LOC_Os03g44010 | Os_chr03    | 24728417               | [C/T] | INTRON                |
| <i>OsMed19_1</i> | LOC_Os03g44010 | Os_chr03    | 24728351               | [G/A] | INTRON                |
| <i>OsMed19_1</i> | LOC_Os03g44010 | Os_chr03    | 24728254               | [A/T] | INTRON                |
| <i>OsMed19_1</i> | LOC_Os03g44010 | Os_chr03    | 24728234               | [A/G] | INTRON                |
| <i>OsMed19_1</i> | LOC_Os03g44010 | Os_chr03    | 24727787               | [T/C] | INTRON                |
| <i>OsMed19_1</i> | LOC_Os03g44010 | Os_chr03    | 24727757               | [C/T] | INTRON                |
| <i>OsMed19_1</i> | LOC_Os03g44010 | Os_chr03    | 24727432               | [C/T] | INTRON                |
| <i>OsMed19_1</i> | LOC_Os03g44010 | Os_chr03    | 24727385               | [T/C] | INTRON                |
| <i>OsMed19_1</i> | LOC_Os03g44010 | Os_chr03    | 24726719               | [A/G] | INTRON                |
| <i>OsMed19_1</i> | LOC_Os03g44010 | Os_chr03    | 24726214               | [T/C] | INTRON                |
| <i>OsMed19_1</i> | LOC_Os03g44010 | Os_chr03    | 24725904               | [T/A] | INTRON                |
| <i>OsMed19_1</i> | LOC_Os03g44010 | Os_chr03    | 24727055               | [G/A] | NON-SYNONYMOUS-CODING |
| <i>OsMed19_1</i> | LOC_Os03g44010 | Os_chr03    | 24725593               | [C/T] | REGULATORY            |
| <i>OsMed19_1</i> | LOC_Os03g44010 | Os_chr03    | 24725526               | [C/T] | REGULATORY            |
| <i>OsMed19_1</i> | LOC_Os03g44010 | Os_chr03    | 24730241               | [T/C] | REGULATORY            |
| <i>OsMed19_1</i> | LOC_Os03g44010 | Os_chr03    | 24725357               | [A/G] | REGULATORY            |
| <i>OsMed19_1</i> | LOC_Os03g44010 | Os_chr03    | 24725219               | [A/G] | REGULATORY            |
| <i>OsMed19_1</i> | LOC_Os03g44010 | Os_chr03    | 24725171               | [C/T] | REGULATORY            |
| <i>OsMed19_1</i> | LOC_Os03g44010 | Os_chr03    | 24725145               | [T/C] | REGULATORY            |
| <i>OsMed19_1</i> | LOC_Os03g44010 | Os_chr03    | 24725105               | [G/A] | REGULATORY            |
| <i>OsMed19_1</i> | LOC_Os03g44010 | Os_chr03    | 24725093               | [T/C] | REGULATORY            |
| <i>OsMed19_1</i> | LOC_Os03g44010 | Os_chr03    | 24725078               | [C/T] | REGULATORY            |
| <i>OsMed19_1</i> | LOC_Os03g44010 | Os_chr03    | 24725026               | [C/G] | REGULATORY            |
| <i>OsMed19_1</i> | LOC_Os03g44010 | Os_chr03    | 24725012               | [G/A] | REGULATORY            |
| <i>OsMed19_1</i> | LOC_Os03g44010 | Os_chr03    | 24724979               | [C/T] | REGULATORY            |
| <i>OsMed19_1</i> | LOC_Os03g44010 | Os_chr03    | 24724932               | [C/T] | REGULATORY            |
| <i>OsMed19_1</i> | LOC_Os03g44010 | Os_chr03    | 24724926               | [G/T] | REGULATORY            |
| <i>OsMed19_1</i> | LOC_Os03g44010 | Os_chr03    | 24724899               | [C/T] | REGULATORY            |
| <i>OsMed19_1</i> | LOC_Os03g44010 | Os_chr03    | 24724885               | [C/T] | REGULATORY            |
| <i>OsMed19_1</i> | LOC_Os03g44010 | Os_chr03    | 24724861               | [A/G] | REGULATORY            |
| <i>OsMed19_1</i> | LOC_Os03g44010 | Os_chr03    | 24724847               | [T/G] | REGULATORY            |
| <i>OsMed19_1</i> | LOC_Os03g44010 | Os_chr03    | 24724833               | [G/A] | REGULATORY            |
| <i>OsMed19_1</i> | LOC_Os03g44010 | Os_chr03    | 24724824               | [C/T] | REGULATORY            |
| <i>OsMed19_1</i> | LOC_Os03g44010 | Os_chr03    | 24724823               | [G/A] | REGULATORY            |
| <i>OsMed19_1</i> | LOC_Os03g44010 | Os_chr03    | 24724794               | [C/T] | REGULATORY            |
| <i>OsMed19_1</i> | LOC_Os03g44010 | Os_chr03    | 24724755               | [C/A] | REGULATORY            |
| <i>OsMed19_1</i> | LOC_Os03g44010 | Os_chr03    | 24724729               | [G/A] | REGULATORY            |
| <i>OsMed19_1</i> | LOC_Os03g44010 | Os_chr03    | 24724521               | [T/C] | REGULATORY            |
| <i>OsMed19_1</i> | LOC_Os03g44010 | Os_chr03    | 24724464               | [C/T] | REGULATORY            |
| <i>OsMed19_1</i> | LOC_Os03g44010 | Os_chr03    | 24724434               | [G/C] | REGULATORY            |
| <i>OsMed19_1</i> | LOC_Os03g44010 | Os_chr03    | 24724432               | [T/C] | REGULATORY            |
| <i>OsMed19_2</i> | LOC_Os12g41962 | Os_chr12    | 25992042               | [G/A] | INTRON                |
| <i>OsMed19_2</i> | LOC_Os12g41962 | Os_chr12    | 25992009               | [C/T] | INTRON                |
| <i>OsMed19_2</i> | LOC_Os12g41962 | Os_chr12    | 25991894               | [T/A] | INTRON                |

| Mediator genes   | MSU locus ID   | Chromosomes | Physical Position (bp) | SNPs  | Structural Annotation |
|------------------|----------------|-------------|------------------------|-------|-----------------------|
| <i>OsMed19_2</i> | LOC_Os12g41962 | Os_chr12    | 25991822               | [C/T] | INTRON                |
| <i>OsMed19_2</i> | LOC_Os12g41962 | Os_chr12    | 25991636               | [A/G] | INTRON                |
| <i>OsMed19_2</i> | LOC_Os12g41962 | Os_chr12    | 25991444               | [A/T] | INTRON                |
| <i>OsMed19_2</i> | LOC_Os12g41962 | Os_chr12    | 25990123               | [T/A] | INTRON                |
| <i>OsMed19_2</i> | LOC_Os12g41962 | Os_chr12    | 25990091               | [T/C] | INTRON                |
| <i>OsMed19_2</i> | LOC_Os12g41962 | Os_chr12    | 25989859               | [G/T] | INTRON                |
| <i>OsMed19_2</i> | LOC_Os12g41962 | Os_chr12    | 25990714               | [G/A] | NON-SYNONYMOUS-CODING |
| <i>OsMed19_2</i> | LOC_Os12g41962 | Os_chr12    | 25990684               | [C/T] | NON-SYNONYMOUS-CODING |
| <i>OsMed19_2</i> | LOC_Os12g41962 | Os_chr12    | 25990395               | [C/G] | NON-SYNONYMOUS-CODING |
| <i>OsMed19_2</i> | LOC_Os12g41962 | Os_chr12    | 25988496               | [T/C] | REGULATORY            |
| <i>OsMed19_2</i> | LOC_Os12g41962 | Os_chr12    | 25989587               | [G/A] | REGULATORY            |
| <i>OsMed19_2</i> | LOC_Os12g41962 | Os_chr12    | 25989384               | [T/C] | REGULATORY            |
| <i>OsMed19_2</i> | LOC_Os12g41962 | Os_chr12    | 25989259               | [C/T] | REGULATORY            |
| <i>OsMed19_2</i> | LOC_Os12g41962 | Os_chr12    | 25989093               | [A/G] | REGULATORY            |
| <i>OsMed19_2</i> | LOC_Os12g41962 | Os_chr12    | 25988996               | [A/G] | REGULATORY            |
| <i>OsMed19_2</i> | LOC_Os12g41962 | Os_chr12    | 25988881               | [C/T] | REGULATORY            |
| <i>OsMed19_2</i> | LOC_Os12g41962 | Os_chr12    | 25989818               | [A/G] | REGULATORY            |
| <i>OsMed19_2</i> | LOC_Os12g41962 | Os_chr12    | 25992426               | [A/T] | REGULATORY            |
| <i>OsMed19_2</i> | LOC_Os12g41962 | Os_chr12    | 25992303               | [A/G] | REGULATORY            |
| <i>OsMed19_2</i> | LOC_Os12g41962 | Os_chr12    | 25992302               | [T/G] | REGULATORY            |
| <i>OsMed19_2</i> | LOC_Os12g41962 | Os_chr12    | 25992236               | [A/G] | REGULATORY            |
| <i>OsMed19_2</i> | LOC_Os12g41962 | Os_chr12    | 25991262               | [T/C] | REGULATORY            |
| <i>OsMed19_2</i> | LOC_Os12g41962 | Os_chr12    | 25988051               | [G/T] | REGULATORY            |
| <i>OsMed19_2</i> | LOC_Os12g41962 | Os_chr12    | 25988037               | [T/A] | REGULATORY            |
| <i>OsMed19_2</i> | LOC_Os12g41962 | Os_chr12    | 25988023               | [C/T] | REGULATORY            |
| <i>OsMed19_2</i> | LOC_Os12g41962 | Os_chr12    | 25988005               | [C/T] | REGULATORY            |
| <i>OsMed19_2</i> | LOC_Os12g41962 | Os_chr12    | 25987966               | [G/A] | REGULATORY            |
| <i>OsMed19_2</i> | LOC_Os12g41962 | Os_chr12    | 25987956               | [C/T] | REGULATORY            |
| <i>OsMed19_2</i> | LOC_Os12g41962 | Os_chr12    | 25987950               | [A/G] | REGULATORY            |
| <i>OsMed19_2</i> | LOC_Os12g41962 | Os_chr12    | 25987822               | [G/A] | REGULATORY            |
| <i>OsMed19_2</i> | LOC_Os12g41962 | Os_chr12    | 25987817               | [G/C] | REGULATORY            |
| <i>OsMed19_2</i> | LOC_Os12g41962 | Os_chr12    | 25987786               | [C/T] | REGULATORY            |
| <i>OsMed19_2</i> | LOC_Os12g41962 | Os_chr12    | 25987742               | [T/C] | REGULATORY            |
| <i>OsMed19_2</i> | LOC_Os12g41962 | Os_chr12    | 25987719               | [G/A] | REGULATORY            |
| <i>OsMed19_2</i> | LOC_Os12g41962 | Os_chr12    | 25987684               | [A/G] | REGULATORY            |
| <i>OsMed19_2</i> | LOC_Os12g41962 | Os_chr12    | 25987641               | [T/C] | REGULATORY            |
| <i>OsMed19_2</i> | LOC_Os12g41962 | Os_chr12    | 25987473               | [A/T] | REGULATORY            |
| <i>OsMed19_2</i> | LOC_Os12g41962 | Os_chr12    | 25987322               | [G/C] | REGULATORY            |
| <i>OsMed19_2</i> | LOC_Os12g41962 | Os_chr12    | 25987303               | [A/C] | REGULATORY            |
| <i>OsMed19_2</i> | LOC_Os12g41962 | Os_chr12    | 25987253               | [G/T] | REGULATORY            |
| <i>OsMed19_2</i> | LOC_Os12g41962 | Os_chr12    | 25987216               | [T/A] | REGULATORY            |
| <i>OsMed19_2</i> | LOC_Os12g41962 | Os_chr12    | 25990470               | [T/C] | SYNONYMOUS-CODING     |
| <i>OsMed20_1</i> | LOC_Os09g27140 | Os_chr09    | 16504333               | [G/A] | INTRON                |
| <i>OsMed20_1</i> | LOC_Os09g27140 | Os_chr09    | 16504320               | [C/T] | INTRON                |
| <i>OsMed20_1</i> | LOC_Os09g27140 | Os_chr09    | 16504315               | [C/A] | INTRON                |
| <i>OsMed20_1</i> | LOC_Os09g27140 | Os_chr09    | 16504300               | [C/T] | INTRON                |
| <i>OsMed20_1</i> | LOC_Os09g27140 | Os_chr09    | 16504297               | [C/T] | INTRON                |



| Mediator genes   | MSU locus ID   | Chromosomes | Physical Position (bp) | SNPs  | Structural Annotation |
|------------------|----------------|-------------|------------------------|-------|-----------------------|
| <i>OsMed20_1</i> | LOC_Os09g27140 | Os_chr09    | 16504291               | [A/T] | INTRON                |
| <i>OsMed20_1</i> | LOC_Os09g27140 | Os_chr09    | 16504289               | [G/C] | INTRON                |
| <i>OsMed20_1</i> | LOC_Os09g27140 | Os_chr09    | 16504256               | [A/C] | INTRON                |
| <i>OsMed20_1</i> | LOC_Os09g27140 | Os_chr09    | 16504233               | [C/A] | INTRON                |
| <i>OsMed20_1</i> | LOC_Os09g27140 | Os_chr09    | 16504193               | [G/A] | INTRON                |
| <i>OsMed20_1</i> | LOC_Os09g27140 | Os_chr09    | 16504189               | [G/T] | INTRON                |
| <i>OsMed20_1</i> | LOC_Os09g27140 | Os_chr09    | 16504167               | [G/A] | INTRON                |
| <i>OsMed20_1</i> | LOC_Os09g27140 | Os_chr09    | 16504165               | [A/T] | INTRON                |
| <i>OsMed20_1</i> | LOC_Os09g27140 | Os_chr09    | 16504157               | [G/A] | INTRON                |
| <i>OsMed20_1</i> | LOC_Os09g27140 | Os_chr09    | 16504146               | [G/A] | INTRON                |
| <i>OsMed20_1</i> | LOC_Os09g27140 | Os_chr09    | 16504145               | [G/A] | INTRON                |
| <i>OsMed20_1</i> | LOC_Os09g27140 | Os_chr09    | 16504140               | [C/T] | INTRON                |
| <i>OsMed20_1</i> | LOC_Os09g27140 | Os_chr09    | 16504126               | [T/A] | INTRON                |
| <i>OsMed20_1</i> | LOC_Os09g27140 | Os_chr09    | 16504120               | [G/A] | INTRON                |
| <i>OsMed20_1</i> | LOC_Os09g27140 | Os_chr09    | 16504075               | [T/C] | INTRON                |
| <i>OsMed20_1</i> | LOC_Os09g27140 | Os_chr09    | 16504070               | [T/C] | INTRON                |
| <i>OsMed20_1</i> | LOC_Os09g27140 | Os_chr09    | 16504065               | [G/A] | INTRON                |
| <i>OsMed20_1</i> | LOC_Os09g27140 | Os_chr09    | 16504041               | [T/A] | INTRON                |
| <i>OsMed20_1</i> | LOC_Os09g27140 | Os_chr09    | 16504030               | [C/A] | INTRON                |
| <i>OsMed20_1</i> | LOC_Os09g27140 | Os_chr09    | 16504002               | [C/A] | INTRON                |
| <i>OsMed20_1</i> | LOC_Os09g27140 | Os_chr09    | 16503985               | [G/T] | INTRON                |
| <i>OsMed20_1</i> | LOC_Os09g27140 | Os_chr09    | 16503970               | [C/T] | INTRON                |
| <i>OsMed20_1</i> | LOC_Os09g27140 | Os_chr09    | 16503876               | [C/G] | INTRON                |
| <i>OsMed20_1</i> | LOC_Os09g27140 | Os_chr09    | 16503830               | [G/A] | INTRON                |
| <i>OsMed20_1</i> | LOC_Os09g27140 | Os_chr09    | 16503823               | [G/A] | INTRON                |
| <i>OsMed20_1</i> | LOC_Os09g27140 | Os_chr09    | 16503742               | [G/A] | INTRON                |
| <i>OsMed20_1</i> | LOC_Os09g27140 | Os_chr09    | 16503709               | [G/A] | INTRON                |
| <i>OsMed20_1</i> | LOC_Os09g27140 | Os_chr09    | 16503702               | [G/A] | INTRON                |
| <i>OsMed20_1</i> | LOC_Os09g27140 | Os_chr09    | 16503676               | [C/T] | INTRON                |
| <i>OsMed20_1</i> | LOC_Os09g27140 | Os_chr09    | 16503662               | [G/A] | INTRON                |
| <i>OsMed20_1</i> | LOC_Os09g27140 | Os_chr09    | 16503657               | [G/A] | INTRON                |
| <i>OsMed20_1</i> | LOC_Os09g27140 | Os_chr09    | 16503640               | [A/T] | INTRON                |
| <i>OsMed20_1</i> | LOC_Os09g27140 | Os_chr09    | 16503637               | [G/A] | INTRON                |
| <i>OsMed20_1</i> | LOC_Os09g27140 | Os_chr09    | 16503614               | [G/A] | INTRON                |
| <i>OsMed20_1</i> | LOC_Os09g27140 | Os_chr09    | 16503613               | [G/T] | INTRON                |
| <i>OsMed20_1</i> | LOC_Os09g27140 | Os_chr09    | 16503589               | [C/A] | INTRON                |
| <i>OsMed20_1</i> | LOC_Os09g27140 | Os_chr09    | 16503579               | [G/A] | INTRON                |
| <i>OsMed20_1</i> | LOC_Os09g27140 | Os_chr09    | 16503571               | [G/A] | INTRON                |
| <i>OsMed20_1</i> | LOC_Os09g27140 | Os_chr09    | 16503548               | [G/A] | INTRON                |
| <i>OsMed20_1</i> | LOC_Os09g27140 | Os_chr09    | 16503538               | [G/A] | INTRON                |
| <i>OsMed20_1</i> | LOC_Os09g27140 | Os_chr09    | 16503531               | [G/A] | INTRON                |
| <i>OsMed20_1</i> | LOC_Os09g27140 | Os_chr09    | 16503513               | [G/T] | INTRON                |
| <i>OsMed20_1</i> | LOC_Os09g27140 | Os_chr09    | 16503470               | [G/A] | INTRON                |
| <i>OsMed20_1</i> | LOC_Os09g27140 | Os_chr09    | 16507690               | [C/T] | INTRON                |
| <i>OsMed20_1</i> | LOC_Os09g27140 | Os_chr09    | 16507671               | [A/G] | INTRON                |
| <i>OsMed20_1</i> | LOC_Os09g27140 | Os_chr09    | 16507638               | [C/T] | INTRON                |
| <i>OsMed20_1</i> | LOC_Os09g27140 | Os_chr09    | 16507093               | [A/G] | INTRON                |

| Mediator genes   | MSU locus ID   | Chromosomes | Physical Position (bp) | SNPs  | Structural Annotation |
|------------------|----------------|-------------|------------------------|-------|-----------------------|
| <i>OsMed20_1</i> | LOC_Os09g27140 | Os_chr09    | 16506985               | [C/A] | INTRON                |
| <i>OsMed20_1</i> | LOC_Os09g27140 | Os_chr09    | 16506946               | [C/T] | INTRON                |
| <i>OsMed20_1</i> | LOC_Os09g27140 | Os_chr09    | 16506784               | [G/A] | INTRON                |
| <i>OsMed20_1</i> | LOC_Os09g27140 | Os_chr09    | 16506777               | [A/C] | INTRON                |
| <i>OsMed20_1</i> | LOC_Os09g27140 | Os_chr09    | 16506673               | [C/G] | INTRON                |
| <i>OsMed20_1</i> | LOC_Os09g27140 | Os_chr09    | 16506660               | [T/A] | INTRON                |
| <i>OsMed20_1</i> | LOC_Os09g27140 | Os_chr09    | 16506645               | [T/C] | INTRON                |
| <i>OsMed20_1</i> | LOC_Os09g27140 | Os_chr09    | 16506579               | [C/A] | INTRON                |
| <i>OsMed20_1</i> | LOC_Os09g27140 | Os_chr09    | 16506430               | [A/C] | INTRON                |
| <i>OsMed20_1</i> | LOC_Os09g27140 | Os_chr09    | 16506416               | [G/C] | INTRON                |
| <i>OsMed20_1</i> | LOC_Os09g27140 | Os_chr09    | 16506411               | [G/T] | INTRON                |
| <i>OsMed20_1</i> | LOC_Os09g27140 | Os_chr09    | 16506276               | [C/A] | INTRON                |
| <i>OsMed20_1</i> | LOC_Os09g27140 | Os_chr09    | 16506203               | [G/A] | INTRON                |
| <i>OsMed20_1</i> | LOC_Os09g27140 | Os_chr09    | 16505999               | [T/C] | INTRON                |
| <i>OsMed20_1</i> | LOC_Os09g27140 | Os_chr09    | 16505876               | [C/A] | INTRON                |
| <i>OsMed20_1</i> | LOC_Os09g27140 | Os_chr09    | 16505469               | [C/G] | INTRON                |
| <i>OsMed20_1</i> | LOC_Os09g27140 | Os_chr09    | 16505249               | [C/A] | INTRON                |
| <i>OsMed20_1</i> | LOC_Os09g27140 | Os_chr09    | 16505136               | [C/A] | INTRON                |
| <i>OsMed20_1</i> | LOC_Os09g27140 | Os_chr09    | 16505131               | [G/A] | INTRON                |
| <i>OsMed20_1</i> | LOC_Os09g27140 | Os_chr09    | 16505056               | [C/A] | INTRON                |
| <i>OsMed20_1</i> | LOC_Os09g27140 | Os_chr09    | 16504986               | [G/C] | INTRON                |
| <i>OsMed20_1</i> | LOC_Os09g27140 | Os_chr09    | 16504461               | [G/C] | INTRON                |
| <i>OsMed20_1</i> | LOC_Os09g27140 | Os_chr09    | 16504403               | [T/C] | INTRON                |
| <i>OsMed20_1</i> | LOC_Os09g27140 | Os_chr09    | 16504389               | [G/A] | INTRON                |
| <i>OsMed20_1</i> | LOC_Os09g27140 | Os_chr09    | 16504380               | [C/T] | INTRON                |
| <i>OsMed20_1</i> | LOC_Os09g27140 | Os_chr09    | 16504354               | [A/T] | INTRON                |
| <i>OsMed20_1</i> | LOC_Os09g27140 | Os_chr09    | 16504353               | [G/A] | INTRON                |
| <i>OsMed20_1</i> | LOC_Os09g27140 | Os_chr09    | 16508724               | [T/C] | INTRON                |
| <i>OsMed20_1</i> | LOC_Os09g27140 | Os_chr09    | 16507611               | [G/T] | NON-SYNONYMOUS-CODING |
| <i>OsMed20_1</i> | LOC_Os09g27140 | Os_chr09    | 16507513               | [A/G] | NON-SYNONYMOUS-CODING |
| <i>OsMed20_1</i> | LOC_Os09g27140 | Os_chr09    | 16507357               | [C/G] | NON-SYNONYMOUS-CODING |
| <i>OsMed20_1</i> | LOC_Os09g27140 | Os_chr09    | 16504879               | [G/C] | NON-SYNONYMOUS-CODING |
| <i>OsMed20_1</i> | LOC_Os09g27140 | Os_chr09    | 16504876               | [A/G] | NON-SYNONYMOUS-CODING |
| <i>OsMed20_1</i> | LOC_Os09g27150 | Os_chr09    | 16508594               | [A/G] | NON-SYNONYMOUS-CODING |
| <i>OsMed20_1</i> | LOC_Os09g27140 | Os_chr09    | 16507762               | [C/A] | REGULATORY            |
| <i>OsMed20_1</i> | LOC_Os09g27140 | Os_chr09    | 16503462               | [C/T] | REGULATORY            |
| <i>OsMed20_1</i> | LOC_Os09g27140 | Os_chr09    | 16503403               | [C/T] | REGULATORY            |
| <i>OsMed20_1</i> | LOC_Os09g27140 | Os_chr09    | 16503393               | [T/C] | REGULATORY            |
| <i>OsMed20_1</i> | LOC_Os09g27140 | Os_chr09    | 16503369               | [G/A] | REGULATORY            |
| <i>OsMed20_1</i> | LOC_Os09g27140 | Os_chr09    | 16503353               | [C/T] | REGULATORY            |
| <i>OsMed20_1</i> | LOC_Os09g27140 | Os_chr09    | 16503346               | [G/A] | REGULATORY            |
| <i>OsMed20_1</i> | LOC_Os09g27140 | Os_chr09    | 16503330               | [C/T] | REGULATORY            |
| <i>OsMed20_1</i> | LOC_Os09g27140 | Os_chr09    | 16503301               | [G/A] | REGULATORY            |
| <i>OsMed20_1</i> | LOC_Os09g27140 | Os_chr09    | 16503263               | [C/T] | REGULATORY            |
| <i>OsMed20_1</i> | LOC_Os09g27140 | Os_chr09    | 16503245               | [C/T] | REGULATORY            |
| <i>OsMed20_1</i> | LOC_Os09g27140 | Os_chr09    | 16503138               | [G/C] | REGULATORY            |
| <i>OsMed20_1</i> | LOC_Os09g27140 | Os_chr09    | 16503137               | [G/A] | REGULATORY            |

| Mediator genes   | MSU locus ID   | Chromosomes | Physical Position (bp) | SNPs  | Structural Annotation |
|------------------|----------------|-------------|------------------------|-------|-----------------------|
| <i>OsMed20_1</i> | LOC_Os09g27140 | Os_chr09    | 16503135               | [T/C] | REGULATORY            |
| <i>OsMed20_1</i> | LOC_Os09g27140 | Os_chr09    | 16503131               | [G/A] | REGULATORY            |
| <i>OsMed20_1</i> | LOC_Os09g27140 | Os_chr09    | 16503038               | [C/T] | REGULATORY            |
| <i>OsMed20_1</i> | LOC_Os09g27140 | Os_chr09    | 16503018               | [G/A] | REGULATORY            |
| <i>OsMed20_1</i> | LOC_Os09g27140 | Os_chr09    | 16503010               | [C/T] | REGULATORY            |
| <i>OsMed20_1</i> | LOC_Os09g27140 | Os_chr09    | 16503008               | [G/A] | REGULATORY            |
| <i>OsMed20_1</i> | LOC_Os09g27140 | Os_chr09    | 16503002               | [G/A] | REGULATORY            |
| <i>OsMed20_1</i> | LOC_Os09g27140 | Os_chr09    | 16502988               | [C/T] | REGULATORY            |
| <i>OsMed20_1</i> | LOC_Os09g27140 | Os_chr09    | 16502940               | [G/A] | REGULATORY            |
| <i>OsMed20_1</i> | LOC_Os09g27140 | Os_chr09    | 16502937               | [G/A] | REGULATORY            |
| <i>OsMed20_1</i> | LOC_Os09g27140 | Os_chr09    | 16508426               | [G/T] | REGULATORY            |
| <i>OsMed20_1</i> | LOC_Os09g27140 | Os_chr09    | 16508294               | [G/A] | REGULATORY            |
| <i>OsMed20_1</i> | LOC_Os09g27140 | Os_chr09    | 16508286               | [G/A] | REGULATORY            |
| <i>OsMed20_1</i> | LOC_Os09g27140 | Os_chr09    | 16508275               | [G/A] | REGULATORY            |
| <i>OsMed20_1</i> | LOC_Os09g27140 | Os_chr09    | 16508228               | [C/T] | REGULATORY            |
| <i>OsMed20_1</i> | LOC_Os09g27140 | Os_chr09    | 16508140               | [G/A] | REGULATORY            |
| <i>OsMed20_1</i> | LOC_Os09g27140 | Os_chr09    | 16508131               | [A/G] | REGULATORY            |
| <i>OsMed20_1</i> | LOC_Os09g27140 | Os_chr09    | 16508123               | [G/A] | REGULATORY            |
| <i>OsMed20_1</i> | LOC_Os09g27140 | Os_chr09    | 16508113               | [G/A] | REGULATORY            |
| <i>OsMed20_1</i> | LOC_Os09g27140 | Os_chr09    | 16508112               | [C/A] | REGULATORY            |
| <i>OsMed20_1</i> | LOC_Os09g27140 | Os_chr09    | 16508103               | [C/T] | REGULATORY            |
| <i>OsMed20_1</i> | LOC_Os09g27140 | Os_chr09    | 16508102               | [G/A] | REGULATORY            |
| <i>OsMed20_1</i> | LOC_Os09g27140 | Os_chr09    | 16508096               | [C/T] | REGULATORY            |
| <i>OsMed20_1</i> | LOC_Os09g27140 | Os_chr09    | 16508094               | [G/A] | REGULATORY            |
| <i>OsMed20_1</i> | LOC_Os09g27140 | Os_chr09    | 16508066               | [C/A] | REGULATORY            |
| <i>OsMed20_1</i> | LOC_Os09g27140 | Os_chr09    | 16508042               | [C/T] | REGULATORY            |
| <i>OsMed20_1</i> | LOC_Os09g27140 | Os_chr09    | 16508040               | [G/T] | REGULATORY            |
| <i>OsMed20_1</i> | LOC_Os09g27140 | Os_chr09    | 16508037               | [A/G] | REGULATORY            |
| <i>OsMed20_1</i> | LOC_Os09g27140 | Os_chr09    | 16508033               | [G/A] | REGULATORY            |
| <i>OsMed20_1</i> | LOC_Os09g27140 | Os_chr09    | 16508001               | [T/C] | REGULATORY            |
| <i>OsMed20_1</i> | LOC_Os09g27140 | Os_chr09    | 16507997               | [C/A] | REGULATORY            |
| <i>OsMed20_1</i> | LOC_Os09g27140 | Os_chr09    | 16507960               | [G/A] | REGULATORY            |
| <i>OsMed20_1</i> | LOC_Os09g27140 | Os_chr09    | 16507934               | [T/C] | REGULATORY            |
| <i>OsMed20_1</i> | LOC_Os09g27140 | Os_chr09    | 16507475               | [G/A] | SYNONYMOUS-CODING     |
| <i>OsMed20_1</i> | LOC_Os09g27140 | Os_chr09    | 16505641               | [G/A] | SYNONYMOUS-CODING     |
| <i>OsMed20_1</i> | LOC_Os09g27140 | Os_chr09    | 16504776               | [A/G] | SYNONYMOUS-CODING     |
| <i>OsMed21_1</i> | LOC_Os08g04150 | Os_chr08    | 2014025                | [G/A] | INTRON                |
| <i>OsMed21_1</i> | LOC_Os08g04150 | Os_chr08    | 2013980                | [G/C] | INTRON                |
| <i>OsMed21_1</i> | LOC_Os08g04150 | Os_chr08    | 2013954                | [A/G] | INTRON                |
| <i>OsMed21_1</i> | LOC_Os08g04150 | Os_chr08    | 2013932                | [G/A] | INTRON                |
| <i>OsMed21_1</i> | LOC_Os08g04150 | Os_chr08    | 2013683                | [T/G] | INTRON                |
| <i>OsMed21_1</i> | LOC_Os08g04150 | Os_chr08    | 2013663                | [C/T] | INTRON                |
| <i>OsMed21_1</i> | LOC_Os08g04150 | Os_chr08    | 2013662                | [C/A] | INTRON                |
| <i>OsMed21_1</i> | LOC_Os08g04150 | Os_chr08    | 2013655                | [C/T] | INTRON                |
| <i>OsMed21_1</i> | LOC_Os08g04150 | Os_chr08    | 2013644                | [C/G] | INTRON                |
| <i>OsMed21_1</i> | LOC_Os08g04150 | Os_chr08    | 2013634                | [A/G] | INTRON                |
| <i>OsMed21_1</i> | LOC_Os08g04150 | Os_chr08    | 2013625                | [G/C] | INTRON                |

| Mediator genes   | MSU locus ID   | Chromosomes | Physical Position (bp) | SNPs  | Structural Annotation |
|------------------|----------------|-------------|------------------------|-------|-----------------------|
| <i>OsMed21_1</i> | LOC_Os08g04150 | Os_chr08    | 2013605                | [G/A] | INTRON                |
| <i>OsMed21_1</i> | LOC_Os08g04150 | Os_chr08    | 2013560                | [A/T] | INTRON                |
| <i>OsMed21_1</i> | LOC_Os08g04150 | Os_chr08    | 2013550                | [A/C] | INTRON                |
| <i>OsMed21_1</i> | LOC_Os08g04150 | Os_chr08    | 2013542                | [T/A] | INTRON                |
| <i>OsMed21_1</i> | LOC_Os08g04150 | Os_chr08    | 2013459                | [C/T] | INTRON                |
| <i>OsMed21_1</i> | LOC_Os08g04150 | Os_chr08    | 2013438                | [G/T] | INTRON                |
| <i>OsMed21_1</i> | LOC_Os08g04150 | Os_chr08    | 2013418                | [C/T] | INTRON                |
| <i>OsMed21_1</i> | LOC_Os08g04150 | Os_chr08    | 2013412                | [C/T] | INTRON                |
| <i>OsMed21_1</i> | LOC_Os08g04150 | Os_chr08    | 2013395                | [T/C] | INTRON                |
| <i>OsMed21_1</i> | LOC_Os08g04150 | Os_chr08    | 2013391                | [T/C] | INTRON                |
| <i>OsMed21_1</i> | LOC_Os08g04150 | Os_chr08    | 2013367                | [G/C] | INTRON                |
| <i>OsMed21_1</i> | LOC_Os08g04150 | Os_chr08    | 2013331                | [G/A] | INTRON                |
| <i>OsMed21_1</i> | LOC_Os08g04150 | Os_chr08    | 2013321                | [A/C] | INTRON                |
| <i>OsMed21_1</i> | LOC_Os08g04150 | Os_chr08    | 2013319                | [A/G] | INTRON                |
| <i>OsMed21_1</i> | LOC_Os08g04150 | Os_chr08    | 2013309                | [A/G] | INTRON                |
| <i>OsMed21_1</i> | LOC_Os08g04150 | Os_chr08    | 2013307                | [A/G] | INTRON                |
| <i>OsMed21_1</i> | LOC_Os08g04150 | Os_chr08    | 2013277                | [A/T] | INTRON                |
| <i>OsMed21_1</i> | LOC_Os08g04150 | Os_chr08    | 2013276                | [A/G] | INTRON                |
| <i>OsMed21_1</i> | LOC_Os08g04150 | Os_chr08    | 2013257                | [A/G] | INTRON                |
| <i>OsMed21_1</i> | LOC_Os08g04150 | Os_chr08    | 2013084                | [T/A] | INTRON                |
| <i>OsMed21_1</i> | LOC_Os08g04150 | Os_chr08    | 2013076                | [T/C] | INTRON                |
| <i>OsMed21_1</i> | LOC_Os08g04150 | Os_chr08    | 2013055                | [G/A] | INTRON                |
| <i>OsMed21_1</i> | LOC_Os08g04150 | Os_chr08    | 2013049                | [C/A] | INTRON                |
| <i>OsMed21_1</i> | LOC_Os08g04150 | Os_chr08    | 2012890                | [G/A] | INTRON                |
| <i>OsMed21_1</i> | LOC_Os08g04150 | Os_chr08    | 2012862                | [T/G] | INTRON                |
| <i>OsMed21_1</i> | LOC_Os08g04150 | Os_chr08    | 2012816                | [T/C] | INTRON                |
| <i>OsMed21_1</i> | LOC_Os08g04150 | Os_chr08    | 2012746                | [A/G] | INTRON                |
| <i>OsMed21_1</i> | LOC_Os08g04150 | Os_chr08    | 2012742                | [G/A] | INTRON                |
| <i>OsMed21_1</i> | LOC_Os08g04150 | Os_chr08    | 2012734                | [A/G] | INTRON                |
| <i>OsMed21_1</i> | LOC_Os08g04150 | Os_chr08    | 2012707                | [T/C] | INTRON                |
| <i>OsMed21_1</i> | LOC_Os08g04150 | Os_chr08    | 2012672                | [G/C] | INTRON                |
| <i>OsMed21_1</i> | LOC_Os08g04150 | Os_chr08    | 2012627                | [G/T] | INTRON                |
| <i>OsMed21_1</i> | LOC_Os08g04150 | Os_chr08    | 2012606                | [G/A] | INTRON                |
| <i>OsMed21_1</i> | LOC_Os08g04150 | Os_chr08    | 2012579                | [C/T] | INTRON                |
| <i>OsMed21_1</i> | LOC_Os08g04150 | Os_chr08    | 2012537                | [A/G] | INTRON                |
| <i>OsMed21_1</i> | LOC_Os08g04150 | Os_chr08    | 2012520                | [G/C] | INTRON                |
| <i>OsMed21_1</i> | LOC_Os08g04150 | Os_chr08    | 2012507                | [C/T] | INTRON                |
| <i>OsMed21_1</i> | LOC_Os08g04150 | Os_chr08    | 2012500                | [T/G] | INTRON                |
| <i>OsMed21_1</i> | LOC_Os08g04150 | Os_chr08    | 2012498                | [T/C] | INTRON                |
| <i>OsMed21_1</i> | LOC_Os08g04150 | Os_chr08    | 2014496                | [G/A] | NON-SYNONYMOUS-CODING |
| <i>OsMed21_1</i> | LOC_Os08g04150 | Os_chr08    | 2014446                | [C/T] | NON-SYNONYMOUS-CODING |
| <i>OsMed21_1</i> | LOC_Os08g04150 | Os_chr08    | 2014394                | [C/G] | NON-SYNONYMOUS-CODING |
| <i>OsMed21_1</i> | LOC_Os08g04150 | Os_chr08    | 2013169                | [A/T] | NON-SYNONYMOUS-CODING |
| <i>OsMed21_1</i> | LOC_Os08g04150 | Os_chr08    | 2012458                | [A/G] | REGULATORY            |
| <i>OsMed21_1</i> | LOC_Os08g04150 | Os_chr08    | 2012406                | [T/C] | REGULATORY            |
| <i>OsMed21_1</i> | LOC_Os08g04150 | Os_chr08    | 2012405                | [C/T] | REGULATORY            |
| <i>OsMed21_1</i> | LOC_Os08g04150 | Os_chr08    | 2012362                | [T/A] | REGULATORY            |

| Mediator genes   | MSU locus ID   | Chromosomes | Physical Position (bp) | SNPs  | Structural Annotation |
|------------------|----------------|-------------|------------------------|-------|-----------------------|
| <i>OsMed21_1</i> | LOC_Os08g04150 | Os_chr08    | 2012357                | [C/T] | REGULATORY            |
| <i>OsMed21_1</i> | LOC_Os08g04150 | Os_chr08    | 2012347                | [C/A] | REGULATORY            |
| <i>OsMed21_1</i> | LOC_Os08g04150 | Os_chr08    | 2012316                | [A/G] | REGULATORY            |
| <i>OsMed21_1</i> | LOC_Os08g04150 | Os_chr08    | 2012275                | [T/C] | REGULATORY            |
| <i>OsMed21_1</i> | LOC_Os08g04150 | Os_chr08    | 2012271                | [A/T] | REGULATORY            |
| <i>OsMed21_1</i> | LOC_Os08g04150 | Os_chr08    | 2012267                | [T/A] | REGULATORY            |
| <i>OsMed21_1</i> | LOC_Os08g04150 | Os_chr08    | 2012247                | [G/A] | REGULATORY            |
| <i>OsMed21_1</i> | LOC_Os08g04150 | Os_chr08    | 2012245                | [T/G] | REGULATORY            |
| <i>OsMed21_1</i> | LOC_Os08g04150 | Os_chr08    | 2014722                | [G/C] | REGULATORY            |
| <i>OsMed21_1</i> | LOC_Os08g04150 | Os_chr08    | 2014715                | [A/G] | REGULATORY            |
| <i>OsMed21_1</i> | LOC_Os08g04150 | Os_chr08    | 2014706                | [T/A] | REGULATORY            |
| <i>OsMed21_1</i> | LOC_Os08g04150 | Os_chr08    | 2014670                | [T/C] | REGULATORY            |
| <i>OsMed21_1</i> | LOC_Os08g04150 | Os_chr08    | 2014645                | [C/T] | REGULATORY            |
| <i>OsMed21_1</i> | LOC_Os08g04150 | Os_chr08    | 2014641                | [C/A] | REGULATORY            |
| <i>OsMed21_1</i> | LOC_Os08g04150 | Os_chr08    | 2014617                | [C/T] | REGULATORY            |
| <i>OsMed21_1</i> | LOC_Os08g04150 | Os_chr08    | 2014574                | [G/T] | REGULATORY            |
| <i>OsMed21_1</i> | LOC_Os08g04150 | Os_chr08    | 2014435                | [T/C] | SYNONYMOUS-CODING     |
| <i>OsMed21_1</i> | LOC_Os08g04150 | Os_chr08    | 2014417                | [T/C] | SYNONYMOUS-CODING     |
| <i>OsMed21_1</i> | LOC_Os08g04150 | Os_chr08    | 2013140                | [T/A] | SYNONYMOUS-CODING     |
| <i>OsMed21_1</i> | LOC_Os08g04150 | Os_chr08    | 2012996                | [C/A] | SYNONYMOUS-CODING     |
| <i>OsMed22_1</i> | LOC_Os01g04110 | Os_chr01    | 1790276                | [G/A] | INTRON                |
| <i>OsMed22_1</i> | LOC_Os01g04110 | Os_chr01    | 1790115                | [A/G] | INTRON                |
| <i>OsMed22_1</i> | LOC_Os01g04110 | Os_chr01    | 1790027                | [G/T] | INTRON                |
| <i>OsMed22_1</i> | LOC_Os01g04110 | Os_chr01    | 1790023                | [C/T] | INTRON                |
| <i>OsMed22_1</i> | LOC_Os01g04110 | Os_chr01    | 1789309                | [C/G] | INTRON                |
| <i>OsMed22_1</i> | LOC_Os01g04110 | Os_chr01    | 1789272                | [C/T] | INTRON                |
| <i>OsMed22_1</i> | LOC_Os01g04110 | Os_chr01    | 1789071                | [C/T] | INTRON                |
| <i>OsMed22_1</i> | LOC_Os01g04110 | Os_chr01    | 1789037                | [C/T] | INTRON                |
| <i>OsMed22_1</i> | LOC_Os01g04110 | Os_chr01    | 1788204                | [C/T] | INTRON                |
| <i>OsMed22_1</i> | LOC_Os01g04110 | Os_chr01    | 1788199                | [G/A] | INTRON                |
| <i>OsMed22_1</i> | LOC_Os01g04110 | Os_chr01    | 1788149                | [C/A] | INTRON                |
| <i>OsMed22_1</i> | LOC_Os01g04110 | Os_chr01    | 1788142                | [C/T] | INTRON                |
| <i>OsMed22_1</i> | LOC_Os01g04110 | Os_chr01    | 1788132                | [T/A] | INTRON                |
| <i>OsMed22_1</i> | LOC_Os01g04110 | Os_chr01    | 1788094                | [C/T] | INTRON                |
| <i>OsMed22_1</i> | LOC_Os01g04110 | Os_chr01    | 1788080                | [C/T] | INTRON                |
| <i>OsMed22_1</i> | LOC_Os01g04110 | Os_chr01    | 1788054                | [G/A] | INTRON                |
| <i>OsMed22_1</i> | LOC_Os01g04110 | Os_chr01    | 1788041                | [G/A] | INTRON                |
| <i>OsMed22_1</i> | LOC_Os01g04110 | Os_chr01    | 1788019                | [A/G] | INTRON                |
| <i>OsMed22_1</i> | LOC_Os01g04110 | Os_chr01    | 1788005                | [A/C] | INTRON                |
| <i>OsMed22_1</i> | LOC_Os01g04110 | Os_chr01    | 1787851                | [C/T] | INTRON                |
| <i>OsMed22_1</i> | LOC_Os01g04110 | Os_chr01    | 1787814                | [G/A] | INTRON                |
| <i>OsMed22_1</i> | LOC_Os01g04110 | Os_chr01    | 1787776                | [C/T] | INTRON                |
| <i>OsMed22_1</i> | LOC_Os01g04110 | Os_chr01    | 1787761                | [C/T] | INTRON                |
| <i>OsMed22_1</i> | LOC_Os01g04110 | Os_chr01    | 1787760                | [C/T] | INTRON                |
| <i>OsMed22_1</i> | LOC_Os01g04110 | Os_chr01    | 1787704                | [C/A] | INTRON                |
| <i>OsMed22_1</i> | LOC_Os01g04110 | Os_chr01    | 1787627                | [G/A] | INTRON                |
| <i>OsMed22_1</i> | LOC_Os01g04110 | Os_chr01    | 1787599                | [G/A] | INTRON                |

| Mediator genes   | MSU locus ID   | Chromosomes | Physical Position (bp) | SNPs  | Structural Annotation |
|------------------|----------------|-------------|------------------------|-------|-----------------------|
| <i>OsMed22_1</i> | LOC_Os01g04110 | Os_chr01    | 1787527                | [C/T] | INTRON                |
| <i>OsMed22_1</i> | LOC_Os01g04110 | Os_chr01    | 1787516                | [T/C] | INTRON                |
| <i>OsMed22_1</i> | LOC_Os01g04110 | Os_chr01    | 1787481                | [C/A] | INTRON                |
| <i>OsMed22_1</i> | LOC_Os01g04110 | Os_chr01    | 1787466                | [G/A] | INTRON                |
| <i>OsMed22_1</i> | LOC_Os01g04110 | Os_chr01    | 1787376                | [A/T] | INTRON                |
| <i>OsMed22_1</i> | LOC_Os01g04110 | Os_chr01    | 1790166                | [G/A] | NON-SYNONYMOUS-CODING |
| <i>OsMed22_1</i> | LOC_Os01g04110 | Os_chr01    | 1788862                | [G/A] | NON-SYNONYMOUS-CODING |
| <i>OsMed22_1</i> | LOC_Os01g04110 | Os_chr01    | 1788740                | [C/G] | NON-SYNONYMOUS-CODING |
| <i>OsMed22_1</i> | LOC_Os01g04110 | Os_chr01    | 1790456                | [C/T] | REGULATORY            |
| <i>OsMed22_1</i> | LOC_Os01g04110 | Os_chr01    | 1788630                | [T/C] | REGULATORY            |
| <i>OsMed22_1</i> | LOC_Os01g04110 | Os_chr01    | 1787106                | [G/C] | REGULATORY            |
| <i>OsMed22_1</i> | LOC_Os01g04110 | Os_chr01    | 1787072                | [A/T] | REGULATORY            |
| <i>OsMed22_1</i> | LOC_Os01g04110 | Os_chr01    | 1791335                | [G/A] | REGULATORY            |
| <i>OsMed22_1</i> | LOC_Os01g04110 | Os_chr01    | 1791289                | [T/C] | REGULATORY            |
| <i>OsMed22_1</i> | LOC_Os01g04110 | Os_chr01    | 1791277                | [C/T] | REGULATORY            |
| <i>OsMed22_1</i> | LOC_Os01g04110 | Os_chr01    | 1791274                | [A/G] | REGULATORY            |
| <i>OsMed22_1</i> | LOC_Os01g04110 | Os_chr01    | 1791251                | [A/G] | REGULATORY            |
| <i>OsMed22_1</i> | LOC_Os01g04110 | Os_chr01    | 1791220                | [C/A] | REGULATORY            |
| <i>OsMed22_1</i> | LOC_Os01g04110 | Os_chr01    | 1791191                | [T/C] | REGULATORY            |
| <i>OsMed22_1</i> | LOC_Os01g04110 | Os_chr01    | 1791180                | [C/T] | REGULATORY            |
| <i>OsMed22_1</i> | LOC_Os01g04110 | Os_chr01    | 1791179                | [G/A] | REGULATORY            |
| <i>OsMed22_1</i> | LOC_Os01g04110 | Os_chr01    | 1791155                | [T/A] | REGULATORY            |
| <i>OsMed22_1</i> | LOC_Os01g04110 | Os_chr01    | 1791149                | [A/C] | REGULATORY            |
| <i>OsMed22_1</i> | LOC_Os01g04110 | Os_chr01    | 1791148                | [C/T] | REGULATORY            |
| <i>OsMed22_1</i> | LOC_Os01g04110 | Os_chr01    | 1791083                | [C/T] | REGULATORY            |
| <i>OsMed22_1</i> | LOC_Os01g04110 | Os_chr01    | 1790860                | [G/A] | REGULATORY            |
| <i>OsMed22_1</i> | LOC_Os01g04110 | Os_chr01    | 1790830                | [C/T] | REGULATORY            |
| <i>OsMed22_1</i> | LOC_Os01g04110 | Os_chr01    | 1790820                | [G/A] | REGULATORY            |
| <i>OsMed22_1</i> | LOC_Os01g04110 | Os_chr01    | 1790795                | [G/A] | REGULATORY            |
| <i>OsMed22_1</i> | LOC_Os01g04110 | Os_chr01    | 1790785                | [C/T] | REGULATORY            |
| <i>OsMed22_1</i> | LOC_Os01g04110 | Os_chr01    | 1790769                | [C/T] | REGULATORY            |
| <i>OsMed22_1</i> | LOC_Os01g04110 | Os_chr01    | 1790757                | [A/G] | REGULATORY            |
| <i>OsMed22_1</i> | LOC_Os01g04110 | Os_chr01    | 1790736                | [C/T] | REGULATORY            |
| <i>OsMed22_1</i> | LOC_Os01g04110 | Os_chr01    | 1790725                | [G/A] | REGULATORY            |
| <i>OsMed22_1</i> | LOC_Os01g04110 | Os_chr01    | 1790684                | [A/C] | REGULATORY            |
| <i>OsMed22_1</i> | LOC_Os01g04110 | Os_chr01    | 1790675                | [T/C] | REGULATORY            |
| <i>OsMed22_1</i> | LOC_Os01g04110 | Os_chr01    | 1790669                | [G/T] | REGULATORY            |
| <i>OsMed22_2</i> | LOC_Os08g37480 | Os_chr08    | 23741679               | [T/C] | INTRON                |
| <i>OsMed22_2</i> | LOC_Os08g37480 | Os_chr08    | 23741417               | [A/G] | INTRON                |
| <i>OsMed22_2</i> | LOC_Os08g37480 | Os_chr08    | 23741214               | [T/G] | INTRON                |
| <i>OsMed22_2</i> | LOC_Os08g37480 | Os_chr08    | 23741153               | [C/A] | INTRON                |
| <i>OsMed22_2</i> | LOC_Os08g37480 | Os_chr08    | 23741046               | [G/A] | INTRON                |
| <i>OsMed22_2</i> | LOC_Os08g37480 | Os_chr08    | 23741042               | [C/A] | INTRON                |
| <i>OsMed22_2</i> | LOC_Os08g37480 | Os_chr08    | 23740960               | [C/T] | INTRON                |
| <i>OsMed22_2</i> | LOC_Os08g37480 | Os_chr08    | 23740916               | [A/T] | INTRON                |
| <i>OsMed22_2</i> | LOC_Os08g37480 | Os_chr08    | 23740836               | [C/T] | INTRON                |
| <i>OsMed22_2</i> | LOC_Os08g37480 | Os_chr08    | 23740812               | [G/A] | INTRON                |

| Mediator genes   | MSU locus ID   | Chromosomes | Physical Position (bp) | SNPs  | Structural Annotation |
|------------------|----------------|-------------|------------------------|-------|-----------------------|
| <i>OsMed22_2</i> | LOC_Os08g37480 | Os_chr08    | 23740694               | [T/C] | INTRON                |
| <i>OsMed22_2</i> | LOC_Os08g37480 | Os_chr08    | 23740657               | [A/G] | INTRON                |
| <i>OsMed22_2</i> | LOC_Os08g37480 | Os_chr08    | 23740571               | [C/G] | INTRON                |
| <i>OsMed22_2</i> | LOC_Os08g37480 | Os_chr08    | 23740452               | [C/T] | INTRON                |
| <i>OsMed22_2</i> | LOC_Os08g37480 | Os_chr08    | 23740429               | [G/A] | INTRON                |
| <i>OsMed22_2</i> | LOC_Os08g37480 | Os_chr08    | 23740423               | [C/T] | INTRON                |
| <i>OsMed22_2</i> | LOC_Os08g37480 | Os_chr08    | 23740347               | [C/T] | INTRON                |
| <i>OsMed22_2</i> | LOC_Os08g37480 | Os_chr08    | 23740184               | [T/C] | INTRON                |
| <i>OsMed22_2</i> | LOC_Os08g37480 | Os_chr08    | 23739495               | [A/T] | INTRON                |
| <i>OsMed22_2</i> | LOC_Os08g37480 | Os_chr08    | 23739438               | [G/A] | INTRON                |
| <i>OsMed22_2</i> | LOC_Os08g37480 | Os_chr08    | 23743703               | [A/G] | INTRON                |
| <i>OsMed22_2</i> | LOC_Os08g37480 | Os_chr08    | 23743507               | [A/T] | INTRON                |
| <i>OsMed22_2</i> | LOC_Os08g37480 | Os_chr08    | 23743460               | [A/G] | INTRON                |
| <i>OsMed22_2</i> | LOC_Os08g37480 | Os_chr08    | 23743134               | [T/C] | INTRON                |
| <i>OsMed22_2</i> | LOC_Os08g37480 | Os_chr08    | 23742981               | [C/T] | INTRON                |
| <i>OsMed22_2</i> | LOC_Os08g37480 | Os_chr08    | 23742848               | [A/G] | INTRON                |
| <i>OsMed22_2</i> | LOC_Os08g37480 | Os_chr08    | 23742772               | [A/T] | INTRON                |
| <i>OsMed22_2</i> | LOC_Os08g37480 | Os_chr08    | 23742446               | [T/A] | INTRON                |
| <i>OsMed22_2</i> | LOC_Os08g37480 | Os_chr08    | 23742416               | [C/A] | INTRON                |
| <i>OsMed22_2</i> | LOC_Os08g37480 | Os_chr08    | 23742352               | [G/A] | INTRON                |
| <i>OsMed22_2</i> | LOC_Os08g37480 | Os_chr08    | 23742293               | [A/T] | INTRON                |
| <i>OsMed22_2</i> | LOC_Os08g37480 | Os_chr08    | 23741877               | [G/A] | NON-SYNONYMOUS-CODING |
| <i>OsMed22_2</i> | LOC_Os08g37480 | Os_chr08    | 23738984               | [T/A] | REGULATORY            |
| <i>OsMed22_2</i> | LOC_Os08g37480 | Os_chr08    | 23738787               | [G/A] | REGULATORY            |
| <i>OsMed22_2</i> | LOC_Os08g37480 | Os_chr08    | 23738735               | [C/T] | REGULATORY            |
| <i>OsMed22_2</i> | LOC_Os08g37480 | Os_chr08    | 23745275               | [C/T] | REGULATORY            |
| <i>OsMed22_2</i> | LOC_Os08g37480 | Os_chr08    | 23745252               | [G/A] | REGULATORY            |
| <i>OsMed22_2</i> | LOC_Os08g37480 | Os_chr08    | 23745208               | [G/A] | REGULATORY            |
| <i>OsMed22_2</i> | LOC_Os08g37480 | Os_chr08    | 23745138               | [A/G] | REGULATORY            |
| <i>OsMed22_2</i> | LOC_Os08g37480 | Os_chr08    | 23745092               | [A/G] | REGULATORY            |
| <i>OsMed22_2</i> | LOC_Os08g37480 | Os_chr08    | 23745088               | [C/T] | REGULATORY            |
| <i>OsMed22_2</i> | LOC_Os08g37480 | Os_chr08    | 23745061               | [A/G] | REGULATORY            |
| <i>OsMed22_2</i> | LOC_Os08g37480 | Os_chr08    | 23744807               | [A/G] | REGULATORY            |
| <i>OsMed22_2</i> | LOC_Os08g37480 | Os_chr08    | 23744768               | [A/G] | REGULATORY            |
| <i>OsMed22_2</i> | LOC_Os08g37480 | Os_chr08    | 23744730               | [A/G] | REGULATORY            |
| <i>OsMed22_2</i> | LOC_Os08g37480 | Os_chr08    | 23744530               | [C/T] | REGULATORY            |
| <i>OsMed22_2</i> | LOC_Os08g37480 | Os_chr08    | 23744529               | [G/A] | REGULATORY            |
| <i>OsMed22_2</i> | LOC_Os08g37480 | Os_chr08    | 23744481               | [A/G] | REGULATORY            |
| <i>OsMed22_2</i> | LOC_Os08g37480 | Os_chr08    | 23744471               | [G/A] | REGULATORY            |
| <i>OsMed22_2</i> | LOC_Os08g37480 | Os_chr08    | 23744380               | [G/A] | REGULATORY            |
| <i>OsMed22_2</i> | LOC_Os08g37480 | Os_chr08    | 23744354               | [A/G] | REGULATORY            |
| <i>OsMed22_2</i> | LOC_Os08g37480 | Os_chr08    | 23744336               | [C/T] | REGULATORY            |
| <i>OsMed22_2</i> | LOC_Os08g37480 | Os_chr08    | 23742002               | [C/G] | SYNONYMOUS-CODING     |
| <i>OsMed23_1</i> | LOC_Os02g49992 | Os_chr02    | 30547092               | [G/C] | INTRON                |
| <i>OsMed23_1</i> | LOC_Os02g49992 | Os_chr02    | 30545344               | [T/G] | INTRON                |
| <i>OsMed23_1</i> | LOC_Os02g49992 | Os_chr02    | 30545004               | [G/A] | INTRON                |
| <i>OsMed23_1</i> | LOC_Os02g49992 | Os_chr02    | 30544980               | [T/G] | INTRON                |

| Mediator genes   | MSU locus ID   | Chromosomes | Physical Position (bp) | SNPs  | Structural Annotation |
|------------------|----------------|-------------|------------------------|-------|-----------------------|
| <i>OsMed23_1</i> | LOC_Os02g49992 | Os_chr02    | 30544313               | [T/G] | INTRON                |
| <i>OsMed23_1</i> | LOC_Os02g49992 | Os_chr02    | 30543992               | [T/A] | INTRON                |
| <i>OsMed23_1</i> | LOC_Os02g49992 | Os_chr02    | 30543341               | [C/T] | INTRON                |
| <i>OsMed23_1</i> | LOC_Os02g49992 | Os_chr02    | 30543062               | [A/G] | INTRON                |
| <i>OsMed23_1</i> | LOC_Os02g49992 | Os_chr02    | 30542513               | [G/T] | INTRON                |
| <i>OsMed23_1</i> | LOC_Os02g49992 | Os_chr02    | 30542484               | [T/A] | INTRON                |
| <i>OsMed23_1</i> | LOC_Os02g49992 | Os_chr02    | 30542184               | [C/A] | INTRON                |
| <i>OsMed23_1</i> | LOC_Os02g49992 | Os_chr02    | 30541851               | [T/C] | INTRON                |
| <i>OsMed23_1</i> | LOC_Os02g49992 | Os_chr02    | 30541831               | [G/A] | INTRON                |
| <i>OsMed23_1</i> | LOC_Os02g49992 | Os_chr02    | 30541659               | [G/A] | INTRON                |
| <i>OsMed23_1</i> | LOC_Os02g49992 | Os_chr02    | 30541561               | [G/C] | INTRON                |
| <i>OsMed23_1</i> | LOC_Os02g49992 | Os_chr02    | 30541448               | [G/T] | INTRON                |
| <i>OsMed23_1</i> | LOC_Os02g49992 | Os_chr02    | 30540512               | [C/G] | INTRON                |
| <i>OsMed23_1</i> | LOC_Os02g49992 | Os_chr02    | 30539950               | [C/T] | INTRON                |
| <i>OsMed23_1</i> | LOC_Os02g49992 | Os_chr02    | 30539608               | [A/G] | INTRON                |
| <i>OsMed23_1</i> | LOC_Os02g49992 | Os_chr02    | 30539542               | [G/T] | INTRON                |
| <i>OsMed23_1</i> | LOC_Os02g49992 | Os_chr02    | 30539511               | [A/G] | INTRON                |
| <i>OsMed23_1</i> | LOC_Os02g49992 | Os_chr02    | 30539356               | [A/G] | INTRON                |
| <i>OsMed23_1</i> | LOC_Os02g49992 | Os_chr02    | 30539267               | [C/T] | INTRON                |
| <i>OsMed23_1</i> | LOC_Os02g49992 | Os_chr02    | 30539151               | [T/C] | INTRON                |
| <i>OsMed23_1</i> | LOC_Os02g49992 | Os_chr02    | 30537661               | [A/G] | INTRON                |
| <i>OsMed23_1</i> | LOC_Os02g49992 | Os_chr02    | 30537558               | [A/G] | INTRON                |
| <i>OsMed23_1</i> | LOC_Os02g49992 | Os_chr02    | 30546483               | [G/C] | NON-SYNONYMOUS-CODING |
| <i>OsMed23_1</i> | LOC_Os02g49992 | Os_chr02    | 30546104               | [A/T] | NON-SYNONYMOUS-CODING |
| <i>OsMed23_1</i> | LOC_Os02g49992 | Os_chr02    | 30545858               | [A/G] | NON-SYNONYMOUS-CODING |
| <i>OsMed23_1</i> | LOC_Os02g49992 | Os_chr02    | 30544711               | [A/C] | NON-SYNONYMOUS-CODING |
| <i>OsMed23_1</i> | LOC_Os02g49992 | Os_chr02    | 30544011               | [T/C] | NON-SYNONYMOUS-CODING |
| <i>OsMed23_1</i> | LOC_Os02g49992 | Os_chr02    | 30541135               | [A/T] | NON-SYNONYMOUS-CODING |
| <i>OsMed23_1</i> | LOC_Os02g49992 | Os_chr02    | 30540197               | [C/T] | NON-SYNONYMOUS-CODING |
| <i>OsMed23_1</i> | LOC_Os02g49992 | Os_chr02    | 30536625               | [G/T] | REGULATORY            |
| <i>OsMed23_1</i> | LOC_Os02g57590 | Os_chr02    | 30548430               | [G/A] | REGULATORY            |
| <i>OsMed23_1</i> | LOC_Os02g57590 | Os_chr02    | 30548412               | [G/T] | REGULATORY            |
| <i>OsMed23_1</i> | LOC_Os02g57590 | Os_chr02    | 30548396               | [G/A] | REGULATORY            |
| <i>OsMed23_1</i> | LOC_Os02g57590 | Os_chr02    | 30548370               | [C/T] | REGULATORY            |
| <i>OsMed23_1</i> | LOC_Os02g57590 | Os_chr02    | 30548352               | [G/A] | REGULATORY            |
| <i>OsMed23_1</i> | LOC_Os02g57590 | Os_chr02    | 30548348               | [A/G] | REGULATORY            |
| <i>OsMed23_1</i> | LOC_Os02g57590 | Os_chr02    | 30548340               | [T/C] | REGULATORY            |
| <i>OsMed23_1</i> | LOC_Os02g57590 | Os_chr02    | 30548312               | [T/C] | REGULATORY            |
| <i>OsMed23_1</i> | LOC_Os02g57590 | Os_chr02    | 30548299               | [T/C] | REGULATORY            |
| <i>OsMed23_1</i> | LOC_Os02g57590 | Os_chr02    | 30548297               | [C/T] | REGULATORY            |
| <i>OsMed23_1</i> | LOC_Os02g57590 | Os_chr02    | 30548184               | [A/G] | REGULATORY            |
| <i>OsMed23_1</i> | LOC_Os02g57590 | Os_chr02    | 30548121               | [T/C] | REGULATORY            |
| <i>OsMed23_1</i> | LOC_Os02g57590 | Os_chr02    | 30548087               | [G/A] | REGULATORY            |
| <i>OsMed23_1</i> | LOC_Os02g57590 | Os_chr02    | 30547774               | [T/G] | REGULATORY            |
| <i>OsMed23_1</i> | LOC_Os02g57590 | Os_chr02    | 30547740               | [C/T] | REGULATORY            |
| <i>OsMed23_1</i> | LOC_Os02g49992 | Os_chr02    | 30547585               | [C/T] | SYNONYMOUS-CODING     |
| <i>OsMed23_1</i> | LOC_Os02g49992 | Os_chr02    | 30546466               | [A/G] | SYNONYMOUS-CODING     |



| Mediator genes   | MSU locus ID   | Chromosomes | Physical Position (bp) | SNPs  | Structural Annotation |
|------------------|----------------|-------------|------------------------|-------|-----------------------|
| <i>OsMed23_1</i> | LOC_Os02g49992 | Os_chr02    | 30546265               | [C/T] | SYNONYMOUS-CODING     |
| <i>OsMed23_1</i> | LOC_Os02g49992 | Os_chr02    | 30545190               | [G/A] | SYNONYMOUS-CODING     |
| <i>OsMed23_1</i> | LOC_Os02g49992 | Os_chr02    | 30538983               | [A/G] | SYNONYMOUS-CODING     |
| <i>OsMed23_1</i> | LOC_Os02g49992 | Os_chr02    | 30538896               | [G/A] | SYNONYMOUS-CODING     |
| <i>OsMed23_1</i> | LOC_Os02g49992 | Os_chr02    | 30538322               | [A/G] | SYNONYMOUS-CODING     |
| <i>OsMed25_1</i> | LOC_Os09g13610 | Os_chr09    | 7923217                | [G/A] | INTRON                |
| <i>OsMed25_1</i> | LOC_Os09g13610 | Os_chr09    | 7923215                | [T/A] | INTRON                |
| <i>OsMed25_1</i> | LOC_Os09g13610 | Os_chr09    | 7923178                | [T/G] | INTRON                |
| <i>OsMed25_1</i> | LOC_Os09g13610 | Os_chr09    | 7922944                | [G/A] | INTRON                |
| <i>OsMed25_1</i> | LOC_Os09g13610 | Os_chr09    | 7922812                | [T/C] | INTRON                |
| <i>OsMed25_1</i> | LOC_Os09g13610 | Os_chr09    | 7922477                | [G/A] | INTRON                |
| <i>OsMed25_1</i> | LOC_Os09g13610 | Os_chr09    | 7922406                | [T/A] | INTRON                |
| <i>OsMed25_1</i> | LOC_Os09g13610 | Os_chr09    | 7922360                | [C/T] | INTRON                |
| <i>OsMed25_1</i> | LOC_Os09g13610 | Os_chr09    | 7922272                | [C/T] | INTRON                |
| <i>OsMed25_1</i> | LOC_Os09g13610 | Os_chr09    | 7922171                | [G/C] | INTRON                |
| <i>OsMed25_1</i> | LOC_Os09g13610 | Os_chr09    | 7921990                | [C/T] | INTRON                |
| <i>OsMed25_1</i> | LOC_Os09g13610 | Os_chr09    | 7921277                | [C/T] | INTRON                |
| <i>OsMed25_1</i> | LOC_Os09g13610 | Os_chr09    | 7921248                | [G/A] | INTRON                |
| <i>OsMed25_1</i> | LOC_Os09g13610 | Os_chr09    | 7921131                | [A/G] | INTRON                |
| <i>OsMed25_1</i> | LOC_Os09g13610 | Os_chr09    | 7921113                | [A/G] | INTRON                |
| <i>OsMed25_1</i> | LOC_Os09g13610 | Os_chr09    | 7921065                | [C/T] | INTRON                |
| <i>OsMed25_1</i> | LOC_Os09g13610 | Os_chr09    | 7920926                | [A/T] | INTRON                |
| <i>OsMed25_1</i> | LOC_Os09g13610 | Os_chr09    | 7920881                | [C/A] | INTRON                |
| <i>OsMed25_1</i> | LOC_Os09g13610 | Os_chr09    | 7920878                | [C/G] | INTRON                |
| <i>OsMed25_1</i> | LOC_Os09g13610 | Os_chr09    | 7920859                | [C/T] | INTRON                |
| <i>OsMed25_1</i> | LOC_Os09g13610 | Os_chr09    | 7920726                | [G/T] | INTRON                |
| <i>OsMed25_1</i> | LOC_Os09g13610 | Os_chr09    | 7920719                | [T/G] | INTRON                |
| <i>OsMed25_1</i> | LOC_Os09g13610 | Os_chr09    | 7920702                | [A/G] | INTRON                |
| <i>OsMed25_1</i> | LOC_Os09g13610 | Os_chr09    | 7920661                | [G/A] | INTRON                |
| <i>OsMed25_1</i> | LOC_Os09g13610 | Os_chr09    | 7920585                | [T/C] | INTRON                |
| <i>OsMed25_1</i> | LOC_Os09g13610 | Os_chr09    | 7920569                | [C/T] | INTRON                |
| <i>OsMed25_1</i> | LOC_Os09g13610 | Os_chr09    | 7920474                | [A/C] | INTRON                |
| <i>OsMed25_1</i> | LOC_Os09g13610 | Os_chr09    | 7920459                | [T/A] | INTRON                |
| <i>OsMed25_1</i> | LOC_Os09g13610 | Os_chr09    | 7919388                | [C/T] | INTRON                |
| <i>OsMed25_1</i> | LOC_Os09g13610 | Os_chr09    | 7919131                | [A/G] | INTRON                |
| <i>OsMed25_1</i> | LOC_Os09g13610 | Os_chr09    | 7919087                | [G/A] | INTRON                |
| <i>OsMed25_1</i> | LOC_Os09g13610 | Os_chr09    | 7918909                | [A/G] | INTRON                |
| <i>OsMed25_1</i> | LOC_Os09g13610 | Os_chr09    | 7918673                | [C/G] | INTRON                |
| <i>OsMed25_1</i> | LOC_Os09g13610 | Os_chr09    | 7918634                | [G/T] | INTRON                |
| <i>OsMed25_1</i> | LOC_Os09g13610 | Os_chr09    | 7918628                | [C/A] | INTRON                |
| <i>OsMed25_1</i> | LOC_Os09g13610 | Os_chr09    | 7918406                | [T/A] | INTRON                |
| <i>OsMed25_1</i> | LOC_Os09g13610 | Os_chr09    | 7918378                | [G/A] | INTRON                |
| <i>OsMed25_1</i> | LOC_Os09g13610 | Os_chr09    | 7918371                | [T/A] | INTRON                |
| <i>OsMed25_1</i> | LOC_Os09g13610 | Os_chr09    | 7918367                | [A/C] | INTRON                |
| <i>OsMed25_1</i> | LOC_Os09g13610 | Os_chr09    | 7918349                | [G/T] | INTRON                |
| <i>OsMed25_1</i> | LOC_Os09g13610 | Os_chr09    | 7918335                | [C/T] | INTRON                |
| <i>OsMed25_1</i> | LOC_Os09g13610 | Os_chr09    | 7918290                | [A/G] | INTRON                |

| Mediator genes   | MSU locus ID   | Chromosomes | Physical Position (bp) | SNPs  | Structural Annotation |
|------------------|----------------|-------------|------------------------|-------|-----------------------|
| <i>OsMed25_1</i> | LOC_Os09g13610 | Os_chr09    | 7917814                | [T/C] | INTRON                |
| <i>OsMed25_1</i> | LOC_Os09g13610 | Os_chr09    | 7917791                | [A/T] | INTRON                |
| <i>OsMed25_1</i> | LOC_Os09g13610 | Os_chr09    | 7917663                | [A/G] | INTRON                |
| <i>OsMed25_1</i> | LOC_Os09g13610 | Os_chr09    | 7917524                | [T/G] | INTRON                |
| <i>OsMed25_1</i> | LOC_Os09g13610 | Os_chr09    | 7917498                | [C/T] | INTRON                |
| <i>OsMed25_1</i> | LOC_Os09g13610 | Os_chr09    | 7917223                | [T/G] | INTRON                |
| <i>OsMed25_1</i> | LOC_Os09g13610 | Os_chr09    | 7917152                | [C/T] | INTRON                |
| <i>OsMed25_1</i> | LOC_Os09g13610 | Os_chr09    | 7917067                | [A/G] | INTRON                |
| <i>OsMed25_1</i> | LOC_Os09g13610 | Os_chr09    | 7916656                | [G/A] | INTRON                |
| <i>OsMed25_1</i> | LOC_Os09g13610 | Os_chr09    | 7916610                | [A/G] | INTRON                |
| <i>OsMed25_1</i> | LOC_Os09g13610 | Os_chr09    | 7916531                | [A/G] | INTRON                |
| <i>OsMed25_1</i> | LOC_Os09g13610 | Os_chr09    | 7916316                | [G/A] | INTRON                |
| <i>OsMed25_1</i> | LOC_Os09g13610 | Os_chr09    | 7916302                | [T/C] | INTRON                |
| <i>OsMed25_1</i> | LOC_Os09g13610 | Os_chr09    | 7916298                | [C/T] | INTRON                |
| <i>OsMed25_1</i> | LOC_Os09g13610 | Os_chr09    | 7916249                | [A/C] | INTRON                |
| <i>OsMed25_1</i> | LOC_Os09g13610 | Os_chr09    | 7916231                | [G/A] | INTRON                |
| <i>OsMed25_1</i> | LOC_Os09g13610 | Os_chr09    | 7916220                | [C/T] | INTRON                |
| <i>OsMed25_1</i> | LOC_Os09g13610 | Os_chr09    | 7916115                | [G/A] | INTRON                |
| <i>OsMed25_1</i> | LOC_Os09g13610 | Os_chr09    | 7916106                | [C/T] | INTRON                |
| <i>OsMed25_1</i> | LOC_Os09g13610 | Os_chr09    | 7916060                | [T/A] | INTRON                |
| <i>OsMed25_1</i> | LOC_Os09g13610 | Os_chr09    | 7916010                | [C/T] | INTRON                |
| <i>OsMed25_1</i> | LOC_Os09g13610 | Os_chr09    | 7915828                | [A/G] | INTRON                |
| <i>OsMed25_1</i> | LOC_Os09g13610 | Os_chr09    | 7915797                | [A/G] | INTRON                |
| <i>OsMed25_1</i> | LOC_Os09g13610 | Os_chr09    | 7915774                | [C/G] | INTRON                |
| <i>OsMed25_1</i> | LOC_Os09g13610 | Os_chr09    | 7915742                | [A/C] | INTRON                |
| <i>OsMed25_1</i> | LOC_Os09g13610 | Os_chr09    | 7915700                | [T/C] | INTRON                |
| <i>OsMed25_1</i> | LOC_Os09g13610 | Os_chr09    | 7915541                | [G/T] | INTRON                |
| <i>OsMed25_1</i> | LOC_Os09g13610 | Os_chr09    | 7915391                | [G/T] | INTRON                |
| <i>OsMed25_1</i> | LOC_Os09g13610 | Os_chr09    | 7915260                | [G/A] | INTRON                |
| <i>OsMed25_1</i> | LOC_Os09g13610 | Os_chr09    | 7915064                | [C/T] | INTRON                |
| <i>OsMed25_1</i> | LOC_Os09g13610 | Os_chr09    | 7915020                | [T/A] | INTRON                |
| <i>OsMed25_1</i> | LOC_Os09g13610 | Os_chr09    | 7915019                | [C/A] | INTRON                |
| <i>OsMed25_1</i> | LOC_Os09g13610 | Os_chr09    | 7914904                | [A/C] | INTRON                |
| <i>OsMed25_1</i> | LOC_Os09g13610 | Os_chr09    | 7914831                | [C/T] | INTRON                |
| <i>OsMed25_1</i> | LOC_Os09g13610 | Os_chr09    | 7914638                | [T/G] | INTRON                |
| <i>OsMed25_1</i> | LOC_Os09g13610 | Os_chr09    | 7914545                | [C/T] | INTRON                |
| <i>OsMed25_1</i> | LOC_Os09g13610 | Os_chr09    | 7914308                | [T/C] | INTRON                |
| <i>OsMed25_1</i> | LOC_Os09g13610 | Os_chr09    | 7914279                | [A/T] | INTRON                |
| <i>OsMed25_1</i> | LOC_Os09g13610 | Os_chr09    | 7914266                | [C/T] | INTRON                |
| <i>OsMed25_1</i> | LOC_Os09g13610 | Os_chr09    | 7914212                | [G/A] | INTRON                |
| <i>OsMed25_1</i> | LOC_Os09g13610 | Os_chr09    | 7914211                | [C/T] | INTRON                |
| <i>OsMed25_1</i> | LOC_Os09g13610 | Os_chr09    | 7914158                | [G/T] | INTRON                |
| <i>OsMed25_1</i> | LOC_Os09g13610 | Os_chr09    | 7914101                | [G/T] | INTRON                |
| <i>OsMed25_1</i> | LOC_Os09g13610 | Os_chr09    | 7913989                | [T/A] | INTRON                |
| <i>OsMed25_1</i> | LOC_Os09g13610 | Os_chr09    | 7913857                | [G/C] | INTRON                |
| <i>OsMed25_1</i> | LOC_Os09g13610 | Os_chr09    | 7913806                | [G/A] | INTRON                |
| <i>OsMed25_1</i> | LOC_Os09g13610 | Os_chr09    | 7913770                | [G/T] | INTRON                |

| Mediator genes   | MSU locus ID   | Chromosomes | Physical Position (bp) | SNPs  | Structural Annotation |
|------------------|----------------|-------------|------------------------|-------|-----------------------|
| <i>OsMed25_1</i> | LOC_Os09g13610 | Os_chr09    | 7913630                | [C/T] | INTRON                |
| <i>OsMed25_1</i> | LOC_Os09g13610 | Os_chr09    | 7913435                | [T/C] | INTRON                |
| <i>OsMed25_1</i> | LOC_Os09g13610 | Os_chr09    | 7913418                | [C/G] | INTRON                |
| <i>OsMed25_1</i> | LOC_Os09g13610 | Os_chr09    | 7923934                | [G/A] | NON-SYNONYMOUS-CODING |
| <i>OsMed25_1</i> | LOC_Os09g13610 | Os_chr09    | 7923676                | [G/T] | NON-SYNONYMOUS-CODING |
| <i>OsMed25_1</i> | LOC_Os09g13610 | Os_chr09    | 7923546                | [T/C] | NON-SYNONYMOUS-CODING |
| <i>OsMed25_1</i> | LOC_Os09g13610 | Os_chr09    | 7921525                | [C/T] | NON-SYNONYMOUS-CODING |
| <i>OsMed25_1</i> | LOC_Os09g13610 | Os_chr09    | 7921458                | [G/A] | NON-SYNONYMOUS-CODING |
| <i>OsMed25_1</i> | LOC_Os09g13610 | Os_chr09    | 7921455                | [C/G] | NON-SYNONYMOUS-CODING |
| <i>OsMed25_1</i> | LOC_Os09g13610 | Os_chr09    | 7920107                | [A/G] | NON-SYNONYMOUS-CODING |
| <i>OsMed25_1</i> | LOC_Os09g13610 | Os_chr09    | 7919512                | [C/T] | NON-SYNONYMOUS-CODING |
| <i>OsMed25_1</i> | LOC_Os09g13610 | Os_chr09    | 7916913                | [G/A] | NON-SYNONYMOUS-CODING |
| <i>OsMed25_1</i> | LOC_Os09g13610 | Os_chr09    | 7913212                | [G/A] | REGULATORY            |
| <i>OsMed25_1</i> | LOC_Os09g13610 | Os_chr09    | 7913177                | [A/G] | REGULATORY            |
| <i>OsMed25_1</i> | LOC_Os09g13610 | Os_chr09    | 7913150                | [G/A] | REGULATORY            |
| <i>OsMed25_1</i> | LOC_Os09g13610 | Os_chr09    | 7913124                | [G/A] | REGULATORY            |
| <i>OsMed25_1</i> | LOC_Os09g13610 | Os_chr09    | 7913123                | [T/A] | REGULATORY            |
| <i>OsMed25_1</i> | LOC_Os09g13610 | Os_chr09    | 7924374                | [T/C] | REGULATORY            |
| <i>OsMed25_1</i> | LOC_Os09g13610 | Os_chr09    | 7924368                | [C/A] | REGULATORY            |
| <i>OsMed25_1</i> | LOC_Os09g13610 | Os_chr09    | 7924358                | [T/A] | REGULATORY            |
| <i>OsMed25_1</i> | LOC_Os09g13610 | Os_chr09    | 7924033                | [A/G] | REGULATORY            |
| <i>OsMed25_1</i> | LOC_Os09g13610 | Os_chr09    | 7922655                | [C/A] | REGULATORY            |
| <i>OsMed25_1</i> | LOC_Os09g13610 | Os_chr09    | 7921796                | [A/G] | REGULATORY            |
| <i>OsMed25_1</i> | LOC_Os09g13610 | Os_chr09    | 7921699                | [C/T] | REGULATORY            |
| <i>OsMed25_1</i> | LOC_Os09g13610 | Os_chr09    | 7921654                | [T/C] | REGULATORY            |
| <i>OsMed25_1</i> | LOC_Os09g13610 | Os_chr09    | 7913063                | [T/C] | REGULATORY            |
| <i>OsMed25_1</i> | LOC_Os09g13610 | Os_chr09    | 7913013                | [G/A] | REGULATORY            |
| <i>OsMed25_1</i> | LOC_Os09g13610 | Os_chr09    | 7913008                | [C/T] | REGULATORY            |
| <i>OsMed25_1</i> | LOC_Os09g13610 | Os_chr09    | 7912991                | [C/T] | REGULATORY            |
| <i>OsMed25_1</i> | LOC_Os09g13610 | Os_chr09    | 7912984                | [C/T] | REGULATORY            |
| <i>OsMed25_1</i> | LOC_Os09g13610 | Os_chr09    | 7912981                | [C/T] | REGULATORY            |
| <i>OsMed25_1</i> | LOC_Os09g13610 | Os_chr09    | 7912929                | [A/C] | REGULATORY            |
| <i>OsMed25_1</i> | LOC_Os09g13610 | Os_chr09    | 7912902                | [G/T] | REGULATORY            |
| <i>OsMed25_1</i> | LOC_Os09g13610 | Os_chr09    | 7912874                | [C/T] | REGULATORY            |
| <i>OsMed25_1</i> | LOC_Os09g13610 | Os_chr09    | 7912856                | [T/C] | REGULATORY            |
| <i>OsMed25_1</i> | LOC_Os09g13610 | Os_chr09    | 7912851                | [C/T] | REGULATORY            |
| <i>OsMed25_1</i> | LOC_Os09g13610 | Os_chr09    | 7912841                | [C/T] | REGULATORY            |
| <i>OsMed25_1</i> | LOC_Os09g13610 | Os_chr09    | 7912791                | [C/T] | REGULATORY            |
| <i>OsMed25_1</i> | LOC_Os09g13610 | Os_chr09    | 7912788                | [G/A] | REGULATORY            |
| <i>OsMed25_1</i> | LOC_Os09g13610 | Os_chr09    | 7912769                | [C/T] | REGULATORY            |
| <i>OsMed25_1</i> | LOC_Os09g13610 | Os_chr09    | 7912761                | [C/T] | REGULATORY            |
| <i>OsMed25_1</i> | LOC_Os09g13610 | Os_chr09    | 7912760                | [G/A] | REGULATORY            |
| <i>OsMed25_1</i> | LOC_Os09g13610 | Os_chr09    | 7912757                | [C/T] | REGULATORY            |
| <i>OsMed25_1</i> | LOC_Os09g13610 | Os_chr09    | 7912748                | [C/T] | REGULATORY            |
| <i>OsMed25_1</i> | LOC_Os09g13610 | Os_chr09    | 7912739                | [A/C] | REGULATORY            |
| <i>OsMed25_1</i> | LOC_Os09g13610 | Os_chr09    | 7912738                | [T/G] | REGULATORY            |
| <i>OsMed25_1</i> | LOC_Os09g13610 | Os_chr09    | 7912733                | [A/C] | REGULATORY            |

| Mediator genes   | MSU locus ID   | Chromosomes | Physical Position (bp) | SNPs  | Structural Annotation |
|------------------|----------------|-------------|------------------------|-------|-----------------------|
| <i>OsMed25_1</i> | LOC_Os09g13610 | Os_chr09    | 7912725                | [A/T] | REGULATORY            |
| <i>OsMed25_1</i> | LOC_Os09g13610 | Os_chr09    | 7912722                | [C/T] | REGULATORY            |
| <i>OsMed25_1</i> | LOC_Os09g13610 | Os_chr09    | 7912721                | [C/T] | REGULATORY            |
| <i>OsMed25_1</i> | LOC_Os09g13610 | Os_chr09    | 7912713                | [T/C] | REGULATORY            |
| <i>OsMed25_1</i> | LOC_Os09g13610 | Os_chr09    | 7912700                | [C/T] | REGULATORY            |
| <i>OsMed25_1</i> | LOC_Os09g13610 | Os_chr09    | 7912682                | [G/A] | REGULATORY            |
| <i>OsMed25_1</i> | LOC_Os09g13610 | Os_chr09    | 7912669                | [C/T] | REGULATORY            |
| <i>OsMed25_1</i> | LOC_Os09g13610 | Os_chr09    | 7912657                | [C/T] | REGULATORY            |
| <i>OsMed25_1</i> | LOC_Os09g13610 | Os_chr09    | 7912655                | [A/G] | REGULATORY            |
| <i>OsMed25_1</i> | LOC_Os09g13610 | Os_chr09    | 7912643                | [G/A] | REGULATORY            |
| <i>OsMed25_1</i> | LOC_Os09g13610 | Os_chr09    | 7912631                | [C/T] | REGULATORY            |
| <i>OsMed25_1</i> | LOC_Os09g13610 | Os_chr09    | 7912619                | [A/G] | REGULATORY            |
| <i>OsMed25_1</i> | LOC_Os09g13610 | Os_chr09    | 7912615                | [G/A] | REGULATORY            |
| <i>OsMed25_1</i> | LOC_Os09g13610 | Os_chr09    | 7912603                | [T/C] | REGULATORY            |
| <i>OsMed25_1</i> | LOC_Os09g13610 | Os_chr09    | 7912602                | [G/A] | REGULATORY            |
| <i>OsMed25_1</i> | LOC_Os09g13610 | Os_chr09    | 7912591                | [T/A] | REGULATORY            |
| <i>OsMed25_1</i> | LOC_Os09g13610 | Os_chr09    | 7912576                | [C/T] | REGULATORY            |
| <i>OsMed25_1</i> | LOC_Os09g13610 | Os_chr09    | 7912572                | [G/A] | REGULATORY            |
| <i>OsMed25_1</i> | LOC_Os09g13610 | Os_chr09    | 7912570                | [C/T] | REGULATORY            |
| <i>OsMed25_1</i> | LOC_Os09g13610 | Os_chr09    | 7912552                | [G/A] | REGULATORY            |
| <i>OsMed25_1</i> | LOC_Os09g13610 | Os_chr09    | 7912547                | [C/T] | REGULATORY            |
| <i>OsMed25_1</i> | LOC_Os09g13610 | Os_chr09    | 7912524                | [C/T] | REGULATORY            |
| <i>OsMed25_1</i> | LOC_Os09g13610 | Os_chr09    | 7912492                | [A/G] | REGULATORY            |
| <i>OsMed25_1</i> | LOC_Os09g13610 | Os_chr09    | 7912463                | [A/C] | REGULATORY            |
| <i>OsMed25_1</i> | LOC_Os09g13610 | Os_chr09    | 7912411                | [G/A] | REGULATORY            |
| <i>OsMed25_1</i> | LOC_Os09g13610 | Os_chr09    | 7912393                | [C/G] | REGULATORY            |
| <i>OsMed25_1</i> | LOC_Os09g13610 | Os_chr09    | 7912386                | [A/G] | REGULATORY            |
| <i>OsMed25_1</i> | LOC_Os09g13610 | Os_chr09    | 7912361                | [G/A] | REGULATORY            |
| <i>OsMed25_1</i> | LOC_Os09g13610 | Os_chr09    | 7912336                | [C/T] | REGULATORY            |
| <i>OsMed25_1</i> | LOC_Os09g13610 | Os_chr09    | 7912331                | [T/C] | REGULATORY            |
| <i>OsMed25_1</i> | LOC_Os09g13610 | Os_chr09    | 7912320                | [T/C] | REGULATORY            |
| <i>OsMed25_1</i> | LOC_Os09g13610 | Os_chr09    | 7912239                | [A/G] | REGULATORY            |
| <i>OsMed25_1</i> | LOC_Os09g13610 | Os_chr09    | 7912225                | [G/A] | REGULATORY            |
| <i>OsMed25_1</i> | LOC_Os09g13610 | Os_chr09    | 7912194                | [G/A] | REGULATORY            |
| <i>OsMed25_1</i> | LOC_Os09g13610 | Os_chr09    | 7912157                | [A/C] | REGULATORY            |
| <i>OsMed25_1</i> | LOC_Os09g13610 | Os_chr09    | 7912120                | [A/T] | REGULATORY            |
| <i>OsMed25_1</i> | LOC_Os09g13610 | Os_chr09    | 7912118                | [C/T] | REGULATORY            |
| <i>OsMed25_1</i> | LOC_Os09g13610 | Os_chr09    | 7912099                | [T/A] | REGULATORY            |
| <i>OsMed25_1</i> | LOC_Os09g13610 | Os_chr09    | 7923892                | [G/T] | SYNONYMOUS-CODING     |
| <i>OsMed25_1</i> | LOC_Os09g13610 | Os_chr09    | 7923751                | [A/G] | SYNONYMOUS-CODING     |
| <i>OsMed25_1</i> | LOC_Os09g13610 | Os_chr09    | 7923745                | [G/A] | SYNONYMOUS-CODING     |
| <i>OsMed25_1</i> | LOC_Os09g13610 | Os_chr09    | 7923577                | [A/G] | SYNONYMOUS-CODING     |
| <i>OsMed25_1</i> | LOC_Os09g13610 | Os_chr09    | 7923448                | [G/A] | SYNONYMOUS-CODING     |
| <i>OsMed25_1</i> | LOC_Os09g13610 | Os_chr09    | 7922740                | [T/C] | SYNONYMOUS-CODING     |
| <i>OsMed25_1</i> | LOC_Os09g13610 | Os_chr09    | 7921633                | [G/A] | SYNONYMOUS-CODING     |
| <i>OsMed25_1</i> | LOC_Os09g13610 | Os_chr09    | 7920298                | [G/A] | SYNONYMOUS-CODING     |
| <i>OsMed25_1</i> | LOC_Os09g13610 | Os_chr09    | 7920295                | [A/G] | SYNONYMOUS-CODING     |

| Mediator genes   | MSU locus ID   | Chromosomes | Physical Position (bp) | SNPs  | Structural Annotation |
|------------------|----------------|-------------|------------------------|-------|-----------------------|
| <i>OsMed25_1</i> | LOC_Os09g13610 | Os_chr09    | 7920256                | [A/G] | SYNONYMOUS-CODING     |
| <i>OsMed25_1</i> | LOC_Os09g13610 | Os_chr09    | 7920025                | [G/A] | SYNONYMOUS-CODING     |
| <i>OsMed25_1</i> | LOC_Os09g13610 | Os_chr09    | 7919638                | [G/A] | SYNONYMOUS-CODING     |
| <i>OsMed25_1</i> | LOC_Os09g13610 | Os_chr09    | 7919611                | [G/A] | SYNONYMOUS-CODING     |
| <i>OsMed25_1</i> | LOC_Os09g13610 | Os_chr09    | 7918109                | [A/T] | SYNONYMOUS-CODING     |
| <i>OsMed25_1</i> | LOC_Os09g13610 | Os_chr09    | 7917108                | [T/G] | SYNONYMOUS-CODING     |
| <i>OsMed25_1</i> | LOC_Os09g13610 | Os_chr09    | 7915192                | [A/G] | SYNONYMOUS-CODING     |
| <i>OsMed25_1</i> | LOC_Os09g13610 | Os_chr09    | 7914973                | [C/G] | SYNONYMOUS-CODING     |
| <i>OsMed25_1</i> | LOC_Os09g13610 | Os_chr09    | 7913350                | [C/T] | SYNONYMOUS-CODING     |
| <i>OsMed26_1</i> | LOC_Os10g10260 | Os_chr10    | 5662135                | [C/T] | NON-SYNONYMOUS-CODING |
| <i>OsMed26_1</i> | LOC_Os10g10260 | Os_chr10    | 5662125                | [C/T] | NON-SYNONYMOUS-CODING |
| <i>OsMed26_1</i> | LOC_Os10g10260 | Os_chr10    | 5662120                | [T/C] | NON-SYNONYMOUS-CODING |
| <i>OsMed26_1</i> | LOC_Os10g10260 | Os_chr10    | 5661892                | [C/T] | NON-SYNONYMOUS-CODING |
| <i>OsMed26_1</i> | LOC_Os10g10260 | Os_chr10    | 5661850                | [T/C] | NON-SYNONYMOUS-CODING |
| <i>OsMed26_1</i> | LOC_Os10g10260 | Os_chr10    | 5661768                | [T/C] | NON-SYNONYMOUS-CODING |
| <i>OsMed26_1</i> | LOC_Os10g10270 | Os_chr10    | 5663189                | [C/G] | NON-SYNONYMOUS-CODING |
| <i>OsMed26_1</i> | LOC_Os10g10270 | Os_chr10    | 5663079                | [G/T] | NON-SYNONYMOUS-CODING |
| <i>OsMed26_1</i> | LOC_Os10g10270 | Os_chr10    | 5662959                | [G/T] | NON-SYNONYMOUS-CODING |
| <i>OsMed26_1</i> | LOC_Os10g10270 | Os_chr10    | 5663078                | [G/T] | SYNONYMOUS-CODING     |
| <i>OsMed26_1</i> | LOC_Os10g10270 | Os_chr10    | 5662553                | [C/T] | REGULATORY            |
| <i>OsMed26_1</i> | LOC_Os10g10270 | Os_chr10    | 5662492                | [G/C] | REGULATORY            |
| <i>OsMed26_1</i> | LOC_Os10g10270 | Os_chr10    | 5662396                | [C/A] | REGULATORY            |
| <i>OsMed26_2</i> | LOC_Os11g06650 | Os_chr11    | 3231731                | [G/A] | INTRON                |
| <i>OsMed26_2</i> | LOC_Os11g06650 | Os_chr11    | 3231694                | [C/T] | INTRON                |
| <i>OsMed26_2</i> | LOC_Os11g06650 | Os_chr11    | 3231500                | [A/G] | INTRON                |
| <i>OsMed26_2</i> | LOC_Os11g06650 | Os_chr11    | 3231131                | [G/A] | INTRON                |
| <i>OsMed26_2</i> | LOC_Os11g06650 | Os_chr11    | 3230878                | [G/T] | INTRON                |
| <i>OsMed26_2</i> | LOC_Os11g06650 | Os_chr11    | 3230876                | [A/T] | INTRON                |
| <i>OsMed26_2</i> | LOC_Os11g06650 | Os_chr11    | 3229809                | [T/C] | REGULATORY            |
| <i>OsMed26_2</i> | LOC_Os11g06650 | Os_chr11    | 3229638                | [A/G] | REGULATORY            |
| <i>OsMed26_2</i> | LOC_Os11g06650 | Os_chr11    | 3233424                | [A/C] | REGULATORY            |
| <i>OsMed26_2</i> | LOC_Os11g06650 | Os_chr11    | 3233369                | [G/A] | REGULATORY            |
| <i>OsMed26_2</i> | LOC_Os11g06650 | Os_chr11    | 3233266                | [A/G] | REGULATORY            |
| <i>OsMed26_2</i> | LOC_Os11g06650 | Os_chr11    | 3233254                | [C/T] | REGULATORY            |
| <i>OsMed26_2</i> | LOC_Os11g06650 | Os_chr11    | 3233234                | [C/T] | REGULATORY            |
| <i>OsMed26_2</i> | LOC_Os11g06650 | Os_chr11    | 3233170                | [G/A] | REGULATORY            |
| <i>OsMed26_2</i> | LOC_Os11g06650 | Os_chr11    | 3233121                | [C/T] | REGULATORY            |
| <i>OsMed26_2</i> | LOC_Os11g06650 | Os_chr11    | 3232968                | [C/T] | REGULATORY            |
| <i>OsMed26_2</i> | LOC_Os11g06650 | Os_chr11    | 3232888                | [T/C] | REGULATORY            |
| <i>OsMed26_2</i> | LOC_Os11g06650 | Os_chr11    | 3232879                | [C/T] | REGULATORY            |
| <i>OsMed26_2</i> | LOC_Os11g06650 | Os_chr11    | 3232858                | [T/C] | REGULATORY            |
| <i>OsMed26_2</i> | LOC_Os11g06650 | Os_chr11    | 3232850                | [G/C] | REGULATORY            |
| <i>OsMed26_2</i> | LOC_Os11g06650 | Os_chr11    | 3232802                | [T/C] | REGULATORY            |
| <i>OsMed26_2</i> | LOC_Os11g06650 | Os_chr11    | 3232773                | [G/T] | REGULATORY            |
| <i>OsMed26_2</i> | LOC_Os11g06650 | Os_chr11    | 3232771                | [T/C] | REGULATORY            |
| <i>OsMed26_2</i> | LOC_Os11g06650 | Os_chr11    | 3232763                | [G/A] | REGULATORY            |
| <i>OsMed26_2</i> | LOC_Os11g06650 | Os_chr11    | 3232748                | [A/C] | REGULATORY            |

| Mediator genes   | MSU locus ID   | Chromosomes | Physical Position (bp) | SNPs  | Structural Annotation |
|------------------|----------------|-------------|------------------------|-------|-----------------------|
| <i>OsMed26_2</i> | LOC_Os11g06650 | Os_chr11    | 3232677                | [T/G] | REGULATORY            |
| <i>OsMed26_2</i> | LOC_Os11g06650 | Os_chr11    | 3232596                | [T/G] | REGULATORY            |
| <i>OsMed26_2</i> | LOC_Os11g06650 | Os_chr11    | 3232588                | [T/G] | REGULATORY            |
| <i>OsMed26_2</i> | LOC_Os11g06650 | Os_chr11    | 3232474                | [T/G] | REGULATORY            |
| <i>OsMed26_2</i> | LOC_Os11g06650 | Os_chr11    | 3231995                | [G/A] | SYNONYMOUS-CODING     |
| <i>OsMed26_2</i> | LOC_Os11g06650 | Os_chr11    | 3231620                | [G/A] | SYNONYMOUS-CODING     |
| <i>OsMed26_3</i> | LOC_Os12g06850 | Os_chr12    | 3325594                | [A/T] | INTRON                |
| <i>OsMed26_3</i> | LOC_Os12g06850 | Os_chr12    | 3326944                | [T/C] | INTRON                |
| <i>OsMed26_3</i> | LOC_Os12g06850 | Os_chr12    | 3326926                | [G/A] | INTRON                |
| <i>OsMed26_3</i> | LOC_Os12g06850 | Os_chr12    | 3326481                | [T/C] | INTRON                |
| <i>OsMed26_3</i> | LOC_Os12g06850 | Os_chr12    | 3325886                | [G/A] | INTRON                |
| <i>OsMed26_3</i> | LOC_Os12g06850 | Os_chr12    | 3325247                | [C/A] | NON-SYNONYMOUS-CODING |
| <i>OsMed26_3</i> | LOC_Os12g06850 | Os_chr12    | 3326666                | [C/T] | NON-SYNONYMOUS-CODING |
| <i>OsMed26_3</i> | LOC_Os12g06850 | Os_chr12    | 3328046                | [T/A] | REGULATORY            |
| <i>OsMed26_3</i> | LOC_Os12g06850 | Os_chr12    | 3328001                | [A/G] | REGULATORY            |
| <i>OsMed26_3</i> | LOC_Os12g06850 | Os_chr12    | 3327691                | [T/C] | REGULATORY            |
| <i>OsMed26_3</i> | LOC_Os12g06850 | Os_chr12    | 3324940                | [T/C] | REGULATORY            |
| <i>OsMed26_3</i> | LOC_Os12g06850 | Os_chr12    | 3324751                | [C/G] | REGULATORY            |
| <i>OsMed26_3</i> | LOC_Os12g06850 | Os_chr12    | 3329085                | [C/T] | REGULATORY            |
| <i>OsMed26_3</i> | LOC_Os12g06850 | Os_chr12    | 3329033                | [A/G] | REGULATORY            |
| <i>OsMed26_3</i> | LOC_Os12g06850 | Os_chr12    | 3328995                | [G/A] | REGULATORY            |
| <i>OsMed26_3</i> | LOC_Os12g06850 | Os_chr12    | 3328989                | [C/T] | REGULATORY            |
| <i>OsMed26_3</i> | LOC_Os12g06850 | Os_chr12    | 3328983                | [T/G] | REGULATORY            |
| <i>OsMed26_3</i> | LOC_Os12g06850 | Os_chr12    | 3328962                | [G/A] | REGULATORY            |
| <i>OsMed26_3</i> | LOC_Os12g06850 | Os_chr12    | 3328945                | [G/A] | REGULATORY            |
| <i>OsMed26_3</i> | LOC_Os12g06850 | Os_chr12    | 3328919                | [C/A] | REGULATORY            |
| <i>OsMed26_3</i> | LOC_Os12g06850 | Os_chr12    | 3328896                | [G/A] | REGULATORY            |
| <i>OsMed26_3</i> | LOC_Os12g06850 | Os_chr12    | 3328865                | [C/T] | REGULATORY            |
| <i>OsMed26_3</i> | LOC_Os12g06850 | Os_chr12    | 3328845                | [T/G] | REGULATORY            |
| <i>OsMed26_3</i> | LOC_Os12g06850 | Os_chr12    | 3328773                | [T/C] | REGULATORY            |
| <i>OsMed26_3</i> | LOC_Os12g06850 | Os_chr12    | 3328694                | [G/A] | REGULATORY            |
| <i>OsMed26_3</i> | LOC_Os12g06850 | Os_chr12    | 3328653                | [G/A] | REGULATORY            |
| <i>OsMed26_3</i> | LOC_Os12g06850 | Os_chr12    | 3328602                | [T/G] | REGULATORY            |
| <i>OsMed26_3</i> | LOC_Os12g06850 | Os_chr12    | 3328560                | [G/A] | REGULATORY            |
| <i>OsMed26_3</i> | LOC_Os12g06850 | Os_chr12    | 3328496                | [C/T] | REGULATORY            |
| <i>OsMed26_3</i> | LOC_Os12g06850 | Os_chr12    | 3328469                | [C/T] | REGULATORY            |
| <i>OsMed26_3</i> | LOC_Os12g06850 | Os_chr12    | 3328443                | [T/C] | REGULATORY            |
| <i>OsMed26_3</i> | LOC_Os12g06850 | Os_chr12    | 3328422                | [A/G] | REGULATORY            |
| <i>OsMed26_3</i> | LOC_Os12g06850 | Os_chr12    | 3328382                | [G/A] | REGULATORY            |
| <i>OsMed26_3</i> | LOC_Os12g06850 | Os_chr12    | 3328322                | [A/G] | REGULATORY            |
| <i>OsMed26_3</i> | LOC_Os12g06850 | Os_chr12    | 3325488                | [G/A] | SYNONYMOUS-CODING     |
| <i>OsMed26_3</i> | LOC_Os12g06850 | Os_chr12    | 3325473                | [T/C] | SYNONYMOUS-CODING     |
| <i>OsMed26_3</i> | LOC_Os12g06850 | Os_chr12    | 3325260                | [C/T] | SYNONYMOUS-CODING     |
| <i>OsMed26_3</i> | LOC_Os12g06850 | Os_chr12    | 3326713                | [T/C] | SYNONYMOUS-CODING     |
| <i>OsMed26_4</i> | LOC_Os10g10260 | Os_chr10    | 5662135                | [C/T] | NON-SYNONYMOUS-CODING |
| <i>OsMed26_4</i> | LOC_Os10g10260 | Os_chr10    | 5662125                | [C/T] | NON-SYNONYMOUS-CODING |
| <i>OsMed26_4</i> | LOC_Os10g10260 | Os_chr10    | 5662120                | [T/C] | NON-SYNONYMOUS-CODING |

| Mediator genes   | MSU locus ID   | Chromosomes | Physical Position (bp) | SNPs  | Structural Annotation |
|------------------|----------------|-------------|------------------------|-------|-----------------------|
| <i>OsMed26_4</i> | LOC_Os10g10260 | Os_chr10    | 5661892                | [C/T] | NON-SYNONYMOUS-CODING |
| <i>OsMed26_4</i> | LOC_Os10g10260 | Os_chr10    | 5661850                | [T/C] | NON-SYNONYMOUS-CODING |
| <i>OsMed26_4</i> | LOC_Os10g10260 | Os_chr10    | 5661768                | [T/C] | NON-SYNONYMOUS-CODING |
| <i>OsMed26_4</i> | LOC_Os10g10260 | Os_chr10    | 5661508                | [C/T] | NON-SYNONYMOUS-CODING |
| <i>OsMed26_4</i> | LOC_Os10g10260 | Os_chr10    | 5661501                | [C/T] | NON-SYNONYMOUS-CODING |
| <i>OsMed26_4</i> | LOC_Os10g10260 | Os_chr10    | 5661466                | [C/T] | NON-SYNONYMOUS-CODING |
| <i>OsMed26_4</i> | LOC_Os10g10270 | Os_chr10    | 5663189                | [C/G] | NON-SYNONYMOUS-CODING |
| <i>OsMed26_4</i> | LOC_Os10g10270 | Os_chr10    | 5663079                | [G/T] | NON-SYNONYMOUS-CODING |
| <i>OsMed26_4</i> | LOC_Os10g10270 | Os_chr10    | 5662959                | [G/T] | NON-SYNONYMOUS-CODING |
| <i>OsMed26_4</i> | LOC_Os10g10260 | Os_chr10    | 5661611                | [C/G] | SYNONYMOUS-CODING     |
| <i>OsMed26_4</i> | LOC_Os10g10270 | Os_chr10    | 5663078                | [G/T] | SYNONYMOUS-CODING     |
| <i>OsMed26_4</i> | LOC_Os10g10270 | Os_chr10    | 5662553                | [C/T] | REGULATORY            |
| <i>OsMed26_4</i> | LOC_Os10g10270 | Os_chr10    | 5662492                | [G/C] | REGULATORY            |
| <i>OsMed26_4</i> | LOC_Os10g10270 | Os_chr10    | 5662396                | [C/A] | REGULATORY            |
| <i>OsMed28_1</i> | LOC_Os05g06290 | Os_chr05    | 3215847                | [T/A] | INTRON                |
| <i>OsMed28_1</i> | LOC_Os05g06290 | Os_chr05    | 3215833                | [G/A] | INTRON                |
| <i>OsMed28_1</i> | LOC_Os05g06290 | Os_chr05    | 3215829                | [C/A] | INTRON                |
| <i>OsMed28_1</i> | LOC_Os05g06290 | Os_chr05    | 3215396                | [T/C] | INTRON                |
| <i>OsMed28_1</i> | LOC_Os05g06290 | Os_chr05    | 3215358                | [C/T] | INTRON                |
| <i>OsMed28_1</i> | LOC_Os05g06290 | Os_chr05    | 3215299                | [C/A] | INTRON                |
| <i>OsMed28_1</i> | LOC_Os05g06290 | Os_chr05    | 3215289                | [C/T] | INTRON                |
| <i>OsMed28_1</i> | LOC_Os05g06290 | Os_chr05    | 3215272                | [C/T] | INTRON                |
| <i>OsMed28_1</i> | LOC_Os05g06290 | Os_chr05    | 3215269                | [C/A] | INTRON                |
| <i>OsMed28_1</i> | LOC_Os05g06290 | Os_chr05    | 3215236                | [G/A] | INTRON                |
| <i>OsMed28_1</i> | LOC_Os05g06290 | Os_chr05    | 3215173                | [T/C] | INTRON                |
| <i>OsMed28_1</i> | LOC_Os05g06290 | Os_chr05    | 3215138                | [C/T] | INTRON                |
| <i>OsMed28_1</i> | LOC_Os05g06290 | Os_chr05    | 3215096                | [C/A] | INTRON                |
| <i>OsMed28_1</i> | LOC_Os05g06290 | Os_chr05    | 3214953                | [A/G] | INTRON                |
| <i>OsMed28_1</i> | LOC_Os05g06290 | Os_chr05    | 3214818                | [T/A] | INTRON                |
| <i>OsMed28_1</i> | LOC_Os05g06290 | Os_chr05    | 3214614                | [T/A] | NON-SYNONYMOUS-CODING |
| <i>OsMed28_1</i> | LOC_Os05g06290 | Os_chr05    | 3216297                | [G/T] | REGULATORY            |
| <i>OsMed28_1</i> | LOC_Os05g06290 | Os_chr05    | 3214365                | [C/T] | REGULATORY            |
| <i>OsMed28_1</i> | LOC_Os05g06290 | Os_chr05    | 3214307                | [T/C] | REGULATORY            |
| <i>OsMed28_1</i> | LOC_Os05g06290 | Os_chr05    | 3214233                | [A/C] | REGULATORY            |
| <i>OsMed28_1</i> | LOC_Os05g06290 | Os_chr05    | 3217243                | [A/C] | REGULATORY            |
| <i>OsMed28_1</i> | LOC_Os05g06290 | Os_chr05    | 3217186                | [G/A] | REGULATORY            |
| <i>OsMed28_1</i> | LOC_Os05g06290 | Os_chr05    | 3217140                | [C/T] | REGULATORY            |
| <i>OsMed28_1</i> | LOC_Os05g06290 | Os_chr05    | 3216952                | [G/A] | REGULATORY            |
| <i>OsMed28_1</i> | LOC_Os05g06290 | Os_chr05    | 3216804                | [A/T] | REGULATORY            |
| <i>OsMed28_1</i> | LOC_Os05g06290 | Os_chr05    | 3216756                | [G/A] | REGULATORY            |
| <i>OsMed28_1</i> | LOC_Os05g06290 | Os_chr05    | 3216552                | [A/G] | REGULATORY            |
| <i>OsMed28_1</i> | LOC_Os05g06290 | Os_chr05    | 3216546                | [G/A] | REGULATORY            |
| <i>OsMed28_1</i> | LOC_Os05g06290 | Os_chr05    | 3216409                | [C/T] | REGULATORY            |
| <i>OsMed28_1</i> | LOC_Os05g06290 | Os_chr05    | 3216397                | [C/T] | REGULATORY            |
| <i>OsMed28_1</i> | LOC_Os05g06290 | Os_chr05    | 3216385                | [T/C] | REGULATORY            |
| <i>OsMed3_1</i>  | LOC_Os01g15850 | Os_chr01    | 8927985                | [G/A] | INTRON                |
| <i>OsMed3_1</i>  | LOC_Os01g15850 | Os_chr01    | 8926787                | [C/T] | INTRON                |

| Mediator genes   | MSU locus ID   | Chromosomes | Physical Position (bp) | SNPs  | Structural Annotation |
|------------------|----------------|-------------|------------------------|-------|-----------------------|
| <i>OsMed3_1</i>  | LOC_Os01g15850 | Os_chr01    | 8926776                | [A/T] | INTRON                |
| <i>OsMed3_1</i>  | LOC_Os01g15850 | Os_chr01    | 8926761                | [C/T] | INTRON                |
| <i>OsMed3_1</i>  | LOC_Os01g15850 | Os_chr01    | 8926486                | [G/A] | INTRON                |
| <i>OsMed3_1</i>  | LOC_Os01g15850 | Os_chr01    | 8925941                | [G/A] | INTRON                |
| <i>OsMed3_1</i>  | LOC_Os01g15850 | Os_chr01    | 8925742                | [G/A] | INTRON                |
| <i>OsMed3_1</i>  | LOC_Os01g15850 | Os_chr01    | 8925741                | [T/C] | INTRON                |
| <i>OsMed3_1</i>  | LOC_Os01g15850 | Os_chr01    | 8925712                | [A/T] | INTRON                |
| <i>OsMed3_1</i>  | LOC_Os01g15850 | Os_chr01    | 8925706                | [A/G] | INTRON                |
| <i>OsMed3_1</i>  | LOC_Os01g15850 | Os_chr01    | 8925528                | [A/G] | INTRON                |
| <i>OsMed3_1</i>  | LOC_Os01g15850 | Os_chr01    | 8925390                | [G/A] | INTRON                |
| <i>OsMed3_1</i>  | LOC_Os01g15850 | Os_chr01    | 8925385                | [G/C] | INTRON                |
| <i>OsMed3_1</i>  | LOC_Os01g15850 | Os_chr01    | 8925310                | [G/A] | INTRON                |
| <i>OsMed3_1</i>  | LOC_Os01g15850 | Os_chr01    | 8925293                | [T/C] | INTRON                |
| <i>OsMed3_1</i>  | LOC_Os01g15850 | Os_chr01    | 8925104                | [G/A] | INTRON                |
| <i>OsMed3_1</i>  | LOC_Os01g15850 | Os_chr01    | 8925077                | [G/A] | INTRON                |
| <i>OsMed3_1</i>  | LOC_Os01g15850 | Os_chr01    | 8925076                | [C/T] | INTRON                |
| <i>OsMed3_1</i>  | LOC_Os01g15850 | Os_chr01    | 8924909                | [C/T] | INTRON                |
| <i>OsMed3_1</i>  | LOC_Os01g15850 | Os_chr01    | 8924819                | [T/G] | INTRON                |
| <i>OsMed3_1</i>  | LOC_Os01g15850 | Os_chr01    | 8924736                | [G/A] | INTRON                |
| <i>OsMed3_1</i>  | LOC_Os01g15840 | Os_chr01    | 8924005                | [T/A] | NON-SYNONYMOUS-CODING |
| <i>OsMed3_1</i>  | LOC_Os01g15840 | Os_chr01    | 8923173                | [C/T] | NON-SYNONYMOUS-CODING |
| <i>OsMed3_1</i>  | LOC_Os01g15850 | Os_chr01    | 8928601                | [G/T] | REGULATORY            |
| <i>OsMed3_1</i>  | LOC_Os01g15840 | Os_chr01    | 8923212                | [C/T] | SYNONYMOUS-CODING     |
| <i>OsMed3_1</i>  | LOC_Os01g15850 | Os_chr01    | 8928241                | [G/A] | SYNONYMOUS-CODING     |
| <i>OsMed3_1</i>  | LOC_Os01g15850 | Os_chr01    | 8927468                | [A/G] | SYNONYMOUS-CODING     |
| <i>OsMed30_1</i> | LOC_Os04g31910 | Os_chr04    | 18944391               | [A/T] | INTRON                |
| <i>OsMed30_1</i> | LOC_Os04g31910 | Os_chr04    | 18944034               | [G/A] | INTRON                |
| <i>OsMed30_1</i> | LOC_Os04g31910 | Os_chr04    | 18943696               | [A/T] | INTRON                |
| <i>OsMed30_1</i> | LOC_Os04g31910 | Os_chr04    | 18943649               | [C/G] | INTRON                |
| <i>OsMed30_1</i> | LOC_Os04g31910 | Os_chr04    | 18943576               | [G/A] | INTRON                |
| <i>OsMed30_1</i> | LOC_Os04g31910 | Os_chr04    | 18943535               | [T/A] | INTRON                |
| <i>OsMed30_1</i> | LOC_Os04g31910 | Os_chr04    | 18943298               | [G/T] | INTRON                |
| <i>OsMed30_1</i> | LOC_Os04g31910 | Os_chr04    | 18943019               | [C/T] | INTRON                |
| <i>OsMed30_1</i> | LOC_Os04g31910 | Os_chr04    | 18942972               | [C/T] | INTRON                |
| <i>OsMed30_1</i> | LOC_Os04g31910 | Os_chr04    | 18942728               | [C/T] | INTRON                |
| <i>OsMed30_1</i> | LOC_Os04g31910 | Os_chr04    | 18942716               | [C/A] | INTRON                |
| <i>OsMed30_1</i> | LOC_Os04g31910 | Os_chr04    | 18942572               | [C/G] | INTRON                |
| <i>OsMed30_1</i> | LOC_Os04g31910 | Os_chr04    | 18942561               | [T/C] | INTRON                |
| <i>OsMed30_1</i> | LOC_Os04g31910 | Os_chr04    | 18942414               | [C/A] | INTRON                |
| <i>OsMed30_1</i> | LOC_Os04g31910 | Os_chr04    | 18944491               | [T/C] | NON-SYNONYMOUS-CODING |
| <i>OsMed30_1</i> | LOC_Os04g31910 | Os_chr04    | 18942234               | [C/A] | REGULATORY            |
| <i>OsMed30_1</i> | LOC_Os04g31910 | Os_chr04    | 18942227               | [T/A] | REGULATORY            |
| <i>OsMed30_1</i> | LOC_Os04g31910 | Os_chr04    | 18941985               | [A/T] | REGULATORY            |
| <i>OsMed30_1</i> | LOC_Os04g31910 | Os_chr04    | 18941936               | [A/G] | REGULATORY            |
| <i>OsMed30_1</i> | LOC_Os04g31910 | Os_chr04    | 18945913               | [T/C] | REGULATORY            |
| <i>OsMed30_1</i> | LOC_Os04g31910 | Os_chr04    | 18945894               | [G/A] | REGULATORY            |
| <i>OsMed30_1</i> | LOC_Os04g31910 | Os_chr04    | 18945822               | [A/T] | REGULATORY            |



| Mediator genes   | MSU locus ID   | Chromosomes | Physical Position (bp) | SNPs  | Structural Annotation |
|------------------|----------------|-------------|------------------------|-------|-----------------------|
| <i>OsMed30_1</i> | LOC_Os04g31910 | Os_chr04    | 18945772               | [C/T] | REGULATORY            |
| <i>OsMed30_1</i> | LOC_Os04g31910 | Os_chr04    | 18945752               | [G/A] | REGULATORY            |
| <i>OsMed30_1</i> | LOC_Os04g31910 | Os_chr04    | 18945711               | [T/C] | REGULATORY            |
| <i>OsMed30_1</i> | LOC_Os04g31910 | Os_chr04    | 18945671               | [A/C] | REGULATORY            |
| <i>OsMed30_1</i> | LOC_Os04g31910 | Os_chr04    | 18945637               | [C/T] | REGULATORY            |
| <i>OsMed30_1</i> | LOC_Os04g31910 | Os_chr04    | 18945592               | [G/A] | REGULATORY            |
| <i>OsMed30_1</i> | LOC_Os04g31910 | Os_chr04    | 18945585               | [C/A] | REGULATORY            |
| <i>OsMed30_1</i> | LOC_Os04g31910 | Os_chr04    | 18945563               | [G/A] | REGULATORY            |
| <i>OsMed30_1</i> | LOC_Os04g31910 | Os_chr04    | 18945528               | [C/T] | REGULATORY            |
| <i>OsMed30_1</i> | LOC_Os04g31910 | Os_chr04    | 18945440               | [G/A] | REGULATORY            |
| <i>OsMed30_1</i> | LOC_Os04g31910 | Os_chr04    | 18945436               | [A/T] | REGULATORY            |
| <i>OsMed30_1</i> | LOC_Os04g31910 | Os_chr04    | 18945359               | [C/T] | REGULATORY            |
| <i>OsMed30_1</i> | LOC_Os04g31910 | Os_chr04    | 18945350               | [A/G] | REGULATORY            |
| <i>OsMed30_1</i> | LOC_Os04g31910 | Os_chr04    | 18945324               | [G/A] | REGULATORY            |
| <i>OsMed30_1</i> | LOC_Os04g31910 | Os_chr04    | 18945264               | [A/G] | REGULATORY            |
| <i>OsMed30_1</i> | LOC_Os04g31910 | Os_chr04    | 18945216               | [T/C] | REGULATORY            |
| <i>OsMed30_1</i> | LOC_Os04g31910 | Os_chr04    | 18945213               | [C/T] | REGULATORY            |
| <i>OsMed30_1</i> | LOC_Os04g31910 | Os_chr04    | 18945126               | [C/T] | REGULATORY            |
| <i>OsMed30_1</i> | LOC_Os04g31910 | Os_chr04    | 18945089               | [G/C] | REGULATORY            |
| <i>OsMed30_1</i> | LOC_Os04g31910 | Os_chr04    | 18945027               | [C/G] | REGULATORY            |
| <i>OsMed31_1</i> | LOC_Os07g07020 | Os_chr07    | 3461341                | [G/A] | INTRON                |
| <i>OsMed31_1</i> | LOC_Os07g07020 | Os_chr07    | 3460271                | [G/T] | INTRON                |
| <i>OsMed31_1</i> | LOC_Os07g07020 | Os_chr07    | 3459601                | [C/G] | INTRON                |
| <i>OsMed31_1</i> | LOC_Os07g07020 | Os_chr07    | 3459430                | [G/T] | INTRON                |
| <i>OsMed31_1</i> | LOC_Os07g07020 | Os_chr07    | 3460793                | [T/G] | INTRON                |
| <i>OsMed31_1</i> | LOC_Os07g07020 | Os_chr07    | 3460718                | [C/T] | INTRON                |
| <i>OsMed31_1</i> | LOC_Os07g07020 | Os_chr07    | 3460697                | [G/C] | INTRON                |
| <i>OsMed31_1</i> | LOC_Os07g07020 | Os_chr07    | 3460999                | [A/G] | INTRON                |
| <i>OsMed31_1</i> | LOC_Os07g07020 | Os_chr07    | 3460968                | [C/T] | INTRON                |
| <i>OsMed31_1</i> | LOC_Os07g07020 | Os_chr07    | 3459943                | [C/T] | NON-SYNONYMOUS-CODING |
| <i>OsMed31_1</i> | LOC_Os07g07020 | Os_chr07    | 3458909                | [C/G] | REGULATORY            |
| <i>OsMed31_1</i> | LOC_Os07g07020 | Os_chr07    | 3461747                | [C/T] | REGULATORY            |
| <i>OsMed31_1</i> | LOC_Os07g07020 | Os_chr07    | 3458743                | [G/A] | REGULATORY            |
| <i>OsMed31_1</i> | LOC_Os07g07020 | Os_chr07    | 3458727                | [T/C] | REGULATORY            |
| <i>OsMed31_1</i> | LOC_Os07g07020 | Os_chr07    | 3458716                | [A/G] | REGULATORY            |
| <i>OsMed31_1</i> | LOC_Os07g07020 | Os_chr07    | 3458634                | [G/A] | REGULATORY            |
| <i>OsMed31_1</i> | LOC_Os07g07020 | Os_chr07    | 3458618                | [C/T] | REGULATORY            |
| <i>OsMed31_1</i> | LOC_Os07g07020 | Os_chr07    | 3458600                | [T/A] | REGULATORY            |
| <i>OsMed31_1</i> | LOC_Os07g07020 | Os_chr07    | 3458564                | [G/T] | REGULATORY            |
| <i>OsMed31_1</i> | LOC_Os07g07020 | Os_chr07    | 3458531                | [G/A] | REGULATORY            |
| <i>OsMed31_1</i> | LOC_Os07g07020 | Os_chr07    | 3458470                | [C/T] | REGULATORY            |
| <i>OsMed31_1</i> | LOC_Os07g07020 | Os_chr07    | 3458433                | [C/G] | REGULATORY            |
| <i>OsMed31_1</i> | LOC_Os07g07020 | Os_chr07    | 3458399                | [C/A] | REGULATORY            |
| <i>OsMed31_1</i> | LOC_Os07g07020 | Os_chr07    | 3458360                | [G/T] | REGULATORY            |
| <i>OsMed31_1</i> | LOC_Os07g07020 | Os_chr07    | 3458348                | [T/C] | REGULATORY            |
| <i>OsMed31_1</i> | LOC_Os07g07020 | Os_chr07    | 3458245                | [G/T] | REGULATORY            |
| <i>OsMed31_1</i> | LOC_Os07g07020 | Os_chr07    | 3458237                | [A/G] | REGULATORY            |

| Mediator genes   | MSU locus ID   | Chromosomes | Physical Position (bp) | SNPs  | Structural Annotation |
|------------------|----------------|-------------|------------------------|-------|-----------------------|
| <i>OsMed31_1</i> | LOC_Os07g07020 | Os_chr07    | 3458215                | [A/G] | REGULATORY            |
| <i>OsMed31_1</i> | LOC_Os07g07020 | Os_chr07    | 3458154                | [G/A] | REGULATORY            |
| <i>OsMed31_1</i> | LOC_Os07g07020 | Os_chr07    | 3458135                | [A/G] | REGULATORY            |
| <i>OsMed31_1</i> | LOC_Os07g07020 | Os_chr07    | 3458078                | [G/A] | REGULATORY            |
| <i>OsMed31_1</i> | LOC_Os07g07020 | Os_chr07    | 3458075                | [G/A] | REGULATORY            |
| <i>OsMed31_1</i> | LOC_Os07g07020 | Os_chr07    | 3457973                | [G/A] | REGULATORY            |
| <i>OsMed31_1</i> | LOC_Os07g07020 | Os_chr07    | 3457969                | [T/C] | REGULATORY            |
| <i>OsMed31_1</i> | LOC_Os07g07020 | Os_chr07    | 3457952                | [C/T] | REGULATORY            |
| <i>OsMed31_1</i> | LOC_Os07g07020 | Os_chr07    | 3457941                | [C/A] | REGULATORY            |
| <i>OsMed31_1</i> | LOC_Os07g07020 | Os_chr07    | 3457849                | [G/A] | REGULATORY            |
| <i>OsMed31_1</i> | LOC_Os07g07020 | Os_chr07    | 3457841                | [C/T] | REGULATORY            |
| <i>OsMed31_2</i> | LOC_Os10g41450 | Os_chr10    | 22209544               | [C/T] | INTRON                |
| <i>OsMed31_2</i> | LOC_Os10g41450 | Os_chr10    | 22209200               | [A/G] | INTRON                |
| <i>OsMed31_2</i> | LOC_Os10g41450 | Os_chr10    | 22209143               | [T/A] | INTRON                |
| <i>OsMed31_2</i> | LOC_Os10g41450 | Os_chr10    | 22209092               | [A/T] | INTRON                |
| <i>OsMed31_2</i> | LOC_Os10g41450 | Os_chr10    | 22209026               | [C/G] | INTRON                |
| <i>OsMed31_2</i> | LOC_Os10g41450 | Os_chr10    | 22208618               | [G/T] | INTRON                |
| <i>OsMed31_2</i> | LOC_Os10g41450 | Os_chr10    | 22207961               | [T/A] | INTRON                |
| <i>OsMed31_2</i> | LOC_Os10g41450 | Os_chr10    | 22207950               | [C/T] | INTRON                |
| <i>OsMed31_2</i> | LOC_Os10g41450 | Os_chr10    | 22207943               | [G/A] | INTRON                |
| <i>OsMed31_2</i> | LOC_Os10g41450 | Os_chr10    | 22207942               | [T/C] | INTRON                |
| <i>OsMed31_2</i> | LOC_Os10g41450 | Os_chr10    | 22207892               | [T/A] | INTRON                |
| <i>OsMed31_2</i> | LOC_Os10g41450 | Os_chr10    | 22207737               | [C/T] | INTRON                |
| <i>OsMed31_2</i> | LOC_Os10g41450 | Os_chr10    | 22207542               | [A/G] | INTRON                |
| <i>OsMed31_2</i> | LOC_Os10g41450 | Os_chr10    | 22208947               | [T/C] | NON-SYNONYMOUS-CODING |
| <i>OsMed31_2</i> | LOC_Os10g41450 | Os_chr10    | 22208938               | [T/A] | NON-SYNONYMOUS-CODING |
| <i>OsMed31_2</i> | LOC_Os10g41450 | Os_chr10    | 22208266               | [G/A] | NON-SYNONYMOUS-CODING |
| <i>OsMed31_2</i> | LOC_Os10g41450 | Os_chr10    | 22209721               | [C/T] | REGULATORY            |
| <i>OsMed31_2</i> | LOC_Os10g41450 | Os_chr10    | 22210829               | [G/A] | REGULATORY            |
| <i>OsMed31_2</i> | LOC_Os10g41450 | Os_chr10    | 22210819               | [T/C] | REGULATORY            |
| <i>OsMed31_2</i> | LOC_Os10g41450 | Os_chr10    | 22210818               | [A/G] | REGULATORY            |
| <i>OsMed31_2</i> | LOC_Os10g41450 | Os_chr10    | 22210813               | [G/A] | REGULATORY            |
| <i>OsMed31_2</i> | LOC_Os10g41450 | Os_chr10    | 22210744               | [G/A] | REGULATORY            |
| <i>OsMed31_2</i> | LOC_Os10g41450 | Os_chr10    | 22210737               | [G/T] | REGULATORY            |
| <i>OsMed31_2</i> | LOC_Os10g41450 | Os_chr10    | 22210733               | [C/A] | REGULATORY            |
| <i>OsMed31_2</i> | LOC_Os10g41450 | Os_chr10    | 22210722               | [G/A] | REGULATORY            |
| <i>OsMed31_2</i> | LOC_Os10g41450 | Os_chr10    | 22210714               | [A/G] | REGULATORY            |
| <i>OsMed31_2</i> | LOC_Os10g41450 | Os_chr10    | 22210708               | [C/T] | REGULATORY            |
| <i>OsMed31_2</i> | LOC_Os10g41450 | Os_chr10    | 22210706               | [C/T] | REGULATORY            |
| <i>OsMed31_2</i> | LOC_Os10g41450 | Os_chr10    | 22210551               | [A/G] | REGULATORY            |
| <i>OsMed31_2</i> | LOC_Os10g41450 | Os_chr10    | 22210528               | [G/A] | REGULATORY            |
| <i>OsMed31_2</i> | LOC_Os10g41450 | Os_chr10    | 22210478               | [A/G] | REGULATORY            |
| <i>OsMed31_2</i> | LOC_Os10g41450 | Os_chr10    | 22210463               | [G/T] | REGULATORY            |
| <i>OsMed31_2</i> | LOC_Os10g41450 | Os_chr10    | 22210456               | [A/G] | REGULATORY            |
| <i>OsMed31_2</i> | LOC_Os10g41450 | Os_chr10    | 22210452               | [C/G] | REGULATORY            |
| <i>OsMed31_2</i> | LOC_Os10g41450 | Os_chr10    | 22210450               | [C/T] | REGULATORY            |
| <i>OsMed31_2</i> | LOC_Os10g41450 | Os_chr10    | 22210436               | [A/C] | REGULATORY            |

| Mediator genes   | MSU locus ID   | Chromosomes | Physical Position (bp) | SNPs  | Structural Annotation |
|------------------|----------------|-------------|------------------------|-------|-----------------------|
| <i>OsMed31_2</i> | LOC_Os10g41450 | Os_chr10    | 22210434               | [C/T] | REGULATORY            |
| <i>OsMed31_2</i> | LOC_Os10g41450 | Os_chr10    | 22210424               | [G/A] | REGULATORY            |
| <i>OsMed31_2</i> | LOC_Os10g41450 | Os_chr10    | 22210404               | [T/C] | REGULATORY            |
| <i>OsMed31_2</i> | LOC_Os10g41450 | Os_chr10    | 22210398               | [T/C] | REGULATORY            |
| <i>OsMed31_2</i> | LOC_Os10g41450 | Os_chr10    | 22210394               | [G/A] | REGULATORY            |
| <i>OsMed31_2</i> | LOC_Os10g41450 | Os_chr10    | 22210375               | [C/T] | REGULATORY            |
| <i>OsMed31_2</i> | LOC_Os10g41450 | Os_chr10    | 22210369               | [A/G] | REGULATORY            |
| <i>OsMed31_2</i> | LOC_Os10g41450 | Os_chr10    | 22210368               | [C/T] | REGULATORY            |
| <i>OsMed31_2</i> | LOC_Os10g41450 | Os_chr10    | 22210355               | [A/G] | REGULATORY            |
| <i>OsMed31_2</i> | LOC_Os10g41450 | Os_chr10    | 22210302               | [C/T] | REGULATORY            |
| <i>OsMed31_2</i> | LOC_Os10g41450 | Os_chr10    | 22210297               | [C/T] | REGULATORY            |
| <i>OsMed31_2</i> | LOC_Os10g41450 | Os_chr10    | 22210296               | [G/A] | REGULATORY            |
| <i>OsMed31_2</i> | LOC_Os10g41450 | Os_chr10    | 22210183               | [C/T] | REGULATORY            |
| <i>OsMed31_2</i> | LOC_Os10g41450 | Os_chr10    | 22210178               | [T/C] | REGULATORY            |
| <i>OsMed31_2</i> | LOC_Os10g41450 | Os_chr10    | 22210159               | [C/A] | REGULATORY            |
| <i>OsMed31_2</i> | LOC_Os10g41450 | Os_chr10    | 22210119               | [C/T] | REGULATORY            |
| <i>OsMed31_2</i> | LOC_Os10g41450 | Os_chr10    | 22210095               | [G/T] | REGULATORY            |
| <i>OsMed31_2</i> | LOC_Os10g41450 | Os_chr10    | 22210044               | [G/A] | REGULATORY            |
| <i>OsMed31_2</i> | LOC_Os10g41450 | Os_chr10    | 22210014               | [C/T] | REGULATORY            |
| <i>OsMed31_2</i> | LOC_Os10g41450 | Os_chr10    | 22209967               | [G/A] | REGULATORY            |
| <i>OsMed31_2</i> | LOC_Os10g41450 | Os_chr10    | 22209957               | [T/C] | REGULATORY            |
| <i>OsMed31_2</i> | LOC_Os10g41450 | Os_chr10    | 22209936               | [C/T] | REGULATORY            |
| <i>OsMed31_2</i> | LOC_Os10g41450 | Os_chr10    | 22209909               | [C/T] | REGULATORY            |
| <i>OsMed31_2</i> | LOC_Os10g41450 | Os_chr10    | 22209846               | [C/T] | REGULATORY            |
| <i>OsMed34_1</i> | LOC_Os04g35420 | Os_chr04    | 21386178               | [C/A] | INTRON                |
| <i>OsMed34_1</i> | LOC_Os04g35420 | Os_chr04    | 21386083               | [A/C] | INTRON                |
| <i>OsMed34_1</i> | LOC_Os04g35420 | Os_chr04    | 21386044               | [T/C] | INTRON                |
| <i>OsMed34_1</i> | LOC_Os04g35420 | Os_chr04    | 21385957               | [C/A] | INTRON                |
| <i>OsMed34_1</i> | LOC_Os04g35420 | Os_chr04    | 21385927               | [G/A] | INTRON                |
| <i>OsMed34_1</i> | LOC_Os04g35420 | Os_chr04    | 21385878               | [C/A] | INTRON                |
| <i>OsMed34_1</i> | LOC_Os04g35420 | Os_chr04    | 21385732               | [G/A] | INTRON                |
| <i>OsMed34_1</i> | LOC_Os04g35420 | Os_chr04    | 21385604               | [T/C] | INTRON                |
| <i>OsMed34_1</i> | LOC_Os04g35420 | Os_chr04    | 21385489               | [G/A] | INTRON                |
| <i>OsMed34_1</i> | LOC_Os04g35420 | Os_chr04    | 21385484               | [C/A] | INTRON                |
| <i>OsMed34_1</i> | LOC_Os04g35420 | Os_chr04    | 21385454               | [A/G] | INTRON                |
| <i>OsMed34_1</i> | LOC_Os04g35420 | Os_chr04    | 21385392               | [C/G] | INTRON                |
| <i>OsMed34_1</i> | LOC_Os04g35420 | Os_chr04    | 21385014               | [A/G] | INTRON                |
| <i>OsMed34_1</i> | LOC_Os04g35420 | Os_chr04    | 21385005               | [A/G] | INTRON                |
| <i>OsMed34_1</i> | LOC_Os04g35420 | Os_chr04    | 21385004               | [G/T] | INTRON                |
| <i>OsMed34_1</i> | LOC_Os04g35420 | Os_chr04    | 21384954               | [G/A] | INTRON                |
| <i>OsMed34_1</i> | LOC_Os04g35420 | Os_chr04    | 21384886               | [G/T] | INTRON                |
| <i>OsMed34_1</i> | LOC_Os04g35420 | Os_chr04    | 21384882               | [G/A] | INTRON                |
| <i>OsMed34_1</i> | LOC_Os04g35420 | Os_chr04    | 21384880               | [A/T] | INTRON                |
| <i>OsMed34_1</i> | LOC_Os04g35420 | Os_chr04    | 21384859               | [A/T] | INTRON                |
| <i>OsMed34_1</i> | LOC_Os04g35420 | Os_chr04    | 21384831               | [A/G] | INTRON                |
| <i>OsMed34_1</i> | LOC_Os04g35420 | Os_chr04    | 21384810               | [G/A] | INTRON                |
| <i>OsMed34_1</i> | LOC_Os04g35420 | Os_chr04    | 21384784               | [T/C] | INTRON                |

| Mediator genes   | MSU locus ID   | Chromosomes | Physical Position (bp) | SNPs  | Structural Annotation |
|------------------|----------------|-------------|------------------------|-------|-----------------------|
| <i>OsMed34_1</i> | LOC_Os04g35420 | Os_chr04    | 21384725               | [G/A] | INTRON                |
| <i>OsMed34_1</i> | LOC_Os04g35420 | Os_chr04    | 21384708               | [T/G] | INTRON                |
| <i>OsMed34_1</i> | LOC_Os04g35420 | Os_chr04    | 21384682               | [T/C] | INTRON                |
| <i>OsMed34_1</i> | LOC_Os04g35420 | Os_chr04    | 21384599               | [G/A] | INTRON                |
| <i>OsMed34_1</i> | LOC_Os04g35420 | Os_chr04    | 21384586               | [G/A] | INTRON                |
| <i>OsMed34_1</i> | LOC_Os04g35420 | Os_chr04    | 21384545               | [C/T] | INTRON                |
| <i>OsMed34_1</i> | LOC_Os04g35420 | Os_chr04    | 21384527               | [A/G] | INTRON                |
| <i>OsMed34_1</i> | LOC_Os04g35420 | Os_chr04    | 21384525               | [C/T] | INTRON                |
| <i>OsMed34_1</i> | LOC_Os04g35420 | Os_chr04    | 21384514               | [C/T] | INTRON                |
| <i>OsMed34_1</i> | LOC_Os04g35420 | Os_chr04    | 21384473               | [G/A] | INTRON                |
| <i>OsMed34_1</i> | LOC_Os04g35420 | Os_chr04    | 21384281               | [C/G] | INTRON                |
| <i>OsMed34_1</i> | LOC_Os04g35420 | Os_chr04    | 21384234               | [A/G] | INTRON                |
| <i>OsMed34_1</i> | LOC_Os04g35420 | Os_chr04    | 21384205               | [C/T] | INTRON                |
| <i>OsMed34_1</i> | LOC_Os04g35420 | Os_chr04    | 21384182               | [C/T] | INTRON                |
| <i>OsMed34_1</i> | LOC_Os04g35420 | Os_chr04    | 21384106               | [G/A] | INTRON                |
| <i>OsMed34_1</i> | LOC_Os04g35420 | Os_chr04    | 21384083               | [G/A] | INTRON                |
| <i>OsMed34_1</i> | LOC_Os04g35420 | Os_chr04    | 21383928               | [T/C] | INTRON                |
| <i>OsMed34_1</i> | LOC_Os04g35420 | Os_chr04    | 21383476               | [G/A] | INTRON                |
| <i>OsMed34_1</i> | LOC_Os04g35420 | Os_chr04    | 21383112               | [A/T] | INTRON                |
| <i>OsMed34_1</i> | LOC_Os04g35420 | Os_chr04    | 21382975               | [C/A] | INTRON                |
| <i>OsMed34_1</i> | LOC_Os04g35420 | Os_chr04    | 21382920               | [G/A] | INTRON                |
| <i>OsMed34_1</i> | LOC_Os04g35420 | Os_chr04    | 21382901               | [C/T] | INTRON                |
| <i>OsMed34_1</i> | LOC_Os04g35420 | Os_chr04    | 21382828               | [G/T] | INTRON                |
| <i>OsMed34_1</i> | LOC_Os04g35420 | Os_chr04    | 21382035               | [G/A] | INTRON                |
| <i>OsMed34_1</i> | LOC_Os04g35420 | Os_chr04    | 21381948               | [C/A] | INTRON                |
| <i>OsMed34_1</i> | LOC_Os04g35420 | Os_chr04    | 21381916               | [G/A] | INTRON                |
| <i>OsMed34_1</i> | LOC_Os04g35420 | Os_chr04    | 21381863               | [C/T] | INTRON                |
| <i>OsMed34_1</i> | LOC_Os04g35420 | Os_chr04    | 21381743               | [G/A] | INTRON                |
| <i>OsMed34_1</i> | LOC_Os04g35420 | Os_chr04    | 21381653               | [G/T] | INTRON                |
| <i>OsMed34_1</i> | LOC_Os04g35420 | Os_chr04    | 21381609               | [C/T] | INTRON                |
| <i>OsMed34_1</i> | LOC_Os04g35420 | Os_chr04    | 21381581               | [G/A] | INTRON                |
| <i>OsMed34_1</i> | LOC_Os04g35420 | Os_chr04    | 21381523               | [G/T] | INTRON                |
| <i>OsMed34_1</i> | LOC_Os04g35420 | Os_chr04    | 21381086               | [C/A] | INTRON                |
| <i>OsMed34_1</i> | LOC_Os04g35420 | Os_chr04    | 21381081               | [C/T] | INTRON                |
| <i>OsMed34_1</i> | LOC_Os04g35420 | Os_chr04    | 21381080               | [C/T] | INTRON                |
| <i>OsMed34_1</i> | LOC_Os04g35420 | Os_chr04    | 21381058               | [A/G] | INTRON                |
| <i>OsMed34_1</i> | LOC_Os04g35420 | Os_chr04    | 21381009               | [G/T] | INTRON                |
| <i>OsMed34_1</i> | LOC_Os04g35420 | Os_chr04    | 21381000               | [G/T] | INTRON                |
| <i>OsMed34_1</i> | LOC_Os04g35420 | Os_chr04    | 21380528               | [C/T] | INTRON                |
| <i>OsMed34_1</i> | LOC_Os04g35420 | Os_chr04    | 21380364               | [T/A] | INTRON                |
| <i>OsMed34_1</i> | LOC_Os04g35420 | Os_chr04    | 21380223               | [G/A] | INTRON                |
| <i>OsMed34_1</i> | LOC_Os04g35420 | Os_chr04    | 21380165               | [T/C] | INTRON                |
| <i>OsMed34_1</i> | LOC_Os04g35420 | Os_chr04    | 21380144               | [A/G] | INTRON                |
| <i>OsMed34_1</i> | LOC_Os04g35420 | Os_chr04    | 21380131               | [G/A] | INTRON                |
| <i>OsMed34_1</i> | LOC_Os04g35420 | Os_chr04    | 21380126               | [C/G] | INTRON                |
| <i>OsMed34_1</i> | LOC_Os04g35420 | Os_chr04    | 21380073               | [G/A] | INTRON                |
| <i>OsMed34_1</i> | LOC_Os04g35420 | Os_chr04    | 21379851               | [T/G] | INTRON                |

| Mediator genes   | MSU locus ID   | Chromosomes | Physical Position (bp) | SNPs  | Structural Annotation |
|------------------|----------------|-------------|------------------------|-------|-----------------------|
| <i>OsMed34_1</i> | LOC_Os04g35420 | Os_chr04    | 21379848               | [T/C] | INTRON                |
| <i>OsMed34_1</i> | LOC_Os04g35420 | Os_chr04    | 21379697               | [T/C] | INTRON                |
| <i>OsMed34_1</i> | LOC_Os04g35420 | Os_chr04    | 21379692               | [T/C] | INTRON                |
| <i>OsMed34_1</i> | LOC_Os04g35420 | Os_chr04    | 21379642               | [A/G] | INTRON                |
| <i>OsMed34_1</i> | LOC_Os04g35420 | Os_chr04    | 21379487               | [G/T] | INTRON                |
| <i>OsMed34_1</i> | LOC_Os04g35420 | Os_chr04    | 21379450               | [A/T] | INTRON                |
| <i>OsMed34_1</i> | LOC_Os04g35420 | Os_chr04    | 21379310               | [C/T] | INTRON                |
| <i>OsMed34_1</i> | LOC_Os04g35420 | Os_chr04    | 21379255               | [G/A] | INTRON                |
| <i>OsMed34_1</i> | LOC_Os04g35420 | Os_chr04    | 21379234               | [G/A] | INTRON                |
| <i>OsMed34_1</i> | LOC_Os04g35420 | Os_chr04    | 21378953               | [G/C] | INTRON                |
| <i>OsMed34_1</i> | LOC_Os04g35420 | Os_chr04    | 21378938               | [C/T] | INTRON                |
| <i>OsMed34_1</i> | LOC_Os04g35420 | Os_chr04    | 21378836               | [C/T] | INTRON                |
| <i>OsMed34_1</i> | LOC_Os04g35420 | Os_chr04    | 21378817               | [T/A] | INTRON                |
| <i>OsMed34_1</i> | LOC_Os04g35420 | Os_chr04    | 21378752               | [C/A] | INTRON                |
| <i>OsMed34_1</i> | LOC_Os04g35420 | Os_chr04    | 21378577               | [A/G] | INTRON                |
| <i>OsMed34_1</i> | LOC_Os04g35420 | Os_chr04    | 21378436               | [G/A] | INTRON                |
| <i>OsMed34_1</i> | LOC_Os04g35420 | Os_chr04    | 21378287               | [A/G] | INTRON                |
| <i>OsMed34_1</i> | LOC_Os04g35420 | Os_chr04    | 21378238               | [A/T] | INTRON                |
| <i>OsMed34_1</i> | LOC_Os04g35420 | Os_chr04    | 21378230               | [C/T] | INTRON                |
| <i>OsMed34_1</i> | LOC_Os04g35420 | Os_chr04    | 21378068               | [A/T] | INTRON                |
| <i>OsMed34_1</i> | LOC_Os04g35420 | Os_chr04    | 21377838               | [C/A] | INTRON                |
| <i>OsMed34_1</i> | LOC_Os04g35420 | Os_chr04    | 21377562               | [C/T] | INTRON                |
| <i>OsMed34_1</i> | LOC_Os04g35420 | Os_chr04    | 21377548               | [C/T] | INTRON                |
| <i>OsMed34_1</i> | LOC_Os04g35420 | Os_chr04    | 21377043               | [G/T] | INTRON                |
| <i>OsMed34_1</i> | LOC_Os04g35420 | Os_chr04    | 21377023               | [A/G] | INTRON                |
| <i>OsMed34_1</i> | LOC_Os04g35420 | Os_chr04    | 21376663               | [C/T] | INTRON                |
| <i>OsMed34_1</i> | LOC_Os04g35420 | Os_chr04    | 21376567               | [T/C] | INTRON                |
| <i>OsMed34_1</i> | LOC_Os04g35420 | Os_chr04    | 21376555               | [G/A] | INTRON                |
| <i>OsMed34_1</i> | LOC_Os04g35420 | Os_chr04    | 21376522               | [G/T] | INTRON                |
| <i>OsMed34_1</i> | LOC_Os04g35420 | Os_chr04    | 21376490               | [C/T] | INTRON                |
| <i>OsMed34_1</i> | LOC_Os04g35420 | Os_chr04    | 21376477               | [A/G] | INTRON                |
| <i>OsMed34_1</i> | LOC_Os04g35420 | Os_chr04    | 21376419               | [C/T] | INTRON                |
| <i>OsMed34_1</i> | LOC_Os04g35420 | Os_chr04    | 21376330               | [C/G] | INTRON                |
| <i>OsMed34_1</i> | LOC_Os04g35420 | Os_chr04    | 21375868               | [G/A] | INTRON                |
| <i>OsMed34_1</i> | LOC_Os04g35420 | Os_chr04    | 21375846               | [G/T] | INTRON                |
| <i>OsMed34_1</i> | LOC_Os04g35420 | Os_chr04    | 21383778               | [C/T] | NON-SYNONYMOUS-CODING |
| <i>OsMed34_1</i> | LOC_Os04g35420 | Os_chr04    | 21383769               | [T/A] | NON-SYNONYMOUS-CODING |
| <i>OsMed34_1</i> | LOC_Os04g35420 | Os_chr04    | 21383688               | [T/C] | NON-SYNONYMOUS-CODING |
| <i>OsMed34_1</i> | LOC_Os04g35420 | Os_chr04    | 21383600               | [T/A] | NON-SYNONYMOUS-CODING |
| <i>OsMed34_1</i> | LOC_Os04g35420 | Os_chr04    | 21383555               | [G/T] | NON-SYNONYMOUS-CODING |
| <i>OsMed34_1</i> | LOC_Os04g35420 | Os_chr04    | 21383259               | [C/T] | NON-SYNONYMOUS-CODING |
| <i>OsMed34_1</i> | LOC_Os04g35420 | Os_chr04    | 21383101               | [C/G] | NON-SYNONYMOUS-CODING |
| <i>OsMed34_1</i> | LOC_Os04g35420 | Os_chr04    | 21383085               | [G/A] | NON-SYNONYMOUS-CODING |
| <i>OsMed34_1</i> | LOC_Os04g35420 | Os_chr04    | 21382999               | [C/T] | NON-SYNONYMOUS-CODING |
| <i>OsMed34_1</i> | LOC_Os04g35420 | Os_chr04    | 21382442               | [C/T] | NON-SYNONYMOUS-CODING |
| <i>OsMed34_1</i> | LOC_Os04g35420 | Os_chr04    | 21381267               | [G/A] | NON-SYNONYMOUS-CODING |
| <i>OsMed34_1</i> | LOC_Os04g35420 | Os_chr04    | 21380904               | [A/C] | NON-SYNONYMOUS-CODING |

| Mediator genes   | MSU locus ID   | Chromosomes | Physical Position (bp) | SNPs  | Structural Annotation |
|------------------|----------------|-------------|------------------------|-------|-----------------------|
| <i>OsMed34_1</i> | LOC_Os04g35420 | Os_chr04    | 21378714               | [T/G] | NON-SYNONYMOUS-CODING |
| <i>OsMed34_1</i> | LOC_Os04g35420 | Os_chr04    | 21378336               | [A/T] | NON-SYNONYMOUS-CODING |
| <i>OsMed34_1</i> | LOC_Os04g35420 | Os_chr04    | 21378161               | [G/T] | NON-SYNONYMOUS-CODING |
| <i>OsMed34_1</i> | LOC_Os04g35420 | Os_chr04    | 21377894               | [C/T] | NON-SYNONYMOUS-CODING |
| <i>OsMed34_1</i> | LOC_Os04g35420 | Os_chr04    | 21375929               | [T/C] | NON-SYNONYMOUS-CODING |
| <i>OsMed34_1</i> | LOC_Os04g35420 | Os_chr04    | 21375467               | [T/C] | NON-SYNONYMOUS-CODING |
| <i>OsMed34_1</i> | LOC_Os04g35420 | Os_chr04    | 21375452               | [C/T] | NON-SYNONYMOUS-CODING |
| <i>OsMed34_1</i> | LOC_Os04g35420 | Os_chr04    | 21385334               | [C/T] | REGULATORY            |
| <i>OsMed34_1</i> | LOC_Os04g35420 | Os_chr04    | 21386319               | [G/A] | REGULATORY            |
| <i>OsMed34_1</i> | LOC_Os04g35420 | Os_chr04    | 21385297               | [G/A] | REGULATORY            |
| <i>OsMed34_1</i> | LOC_Os04g35420 | Os_chr04    | 21385268               | [C/A] | REGULATORY            |
| <i>OsMed34_1</i> | LOC_Os04g35420 | Os_chr04    | 21375387               | [T/G] | REGULATORY            |
| <i>OsMed34_1</i> | LOC_Os04g35420 | Os_chr04    | 21375299               | [G/A] | REGULATORY            |
| <i>OsMed34_1</i> | LOC_Os04g35420 | Os_chr04    | 21375242               | [C/A] | REGULATORY            |
| <i>OsMed34_1</i> | LOC_Os04g35420 | Os_chr04    | 21375224               | [T/C] | REGULATORY            |
| <i>OsMed34_1</i> | LOC_Os04g35420 | Os_chr04    | 21375157               | [C/T] | REGULATORY            |
| <i>OsMed34_1</i> | LOC_Os04g35420 | Os_chr04    | 21375152               | [C/A] | REGULATORY            |
| <i>OsMed34_1</i> | LOC_Os04g35420 | Os_chr04    | 21375130               | [A/C] | REGULATORY            |
| <i>OsMed34_1</i> | LOC_Os04g35420 | Os_chr04    | 21375114               | [G/A] | REGULATORY            |
| <i>OsMed34_1</i> | LOC_Os04g35420 | Os_chr04    | 21375103               | [C/T] | REGULATORY            |
| <i>OsMed34_1</i> | LOC_Os04g35430 | Os_chr04    | 21387334               | [C/T] | REGULATORY            |
| <i>OsMed34_1</i> | LOC_Os04g35430 | Os_chr04    | 21387302               | [T/C] | REGULATORY            |
| <i>OsMed34_1</i> | LOC_Os04g35430 | Os_chr04    | 21387287               | [A/G] | REGULATORY            |
| <i>OsMed34_1</i> | LOC_Os04g35430 | Os_chr04    | 21387285               | [C/A] | REGULATORY            |
| <i>OsMed34_1</i> | LOC_Os04g35420 | Os_chr04    | 21387264               | [A/C] | REGULATORY            |
| <i>OsMed34_1</i> | LOC_Os04g35420 | Os_chr04    | 21387258               | [T/C] | REGULATORY            |
| <i>OsMed34_1</i> | LOC_Os04g35420 | Os_chr04    | 21387247               | [A/G] | REGULATORY            |
| <i>OsMed34_1</i> | LOC_Os04g35420 | Os_chr04    | 21387219               | [A/G] | REGULATORY            |
| <i>OsMed34_1</i> | LOC_Os04g35420 | Os_chr04    | 21387197               | [A/C] | REGULATORY            |
| <i>OsMed34_1</i> | LOC_Os04g35420 | Os_chr04    | 21387165               | [G/T] | REGULATORY            |
| <i>OsMed34_1</i> | LOC_Os04g35420 | Os_chr04    | 21387147               | [C/T] | REGULATORY            |
| <i>OsMed34_1</i> | LOC_Os04g35420 | Os_chr04    | 21387130               | [G/A] | REGULATORY            |
| <i>OsMed34_1</i> | LOC_Os04g35420 | Os_chr04    | 21387127               | [G/A] | REGULATORY            |
| <i>OsMed34_1</i> | LOC_Os04g35420 | Os_chr04    | 21387108               | [A/T] | REGULATORY            |
| <i>OsMed34_1</i> | LOC_Os04g35420 | Os_chr04    | 21387101               | [C/A] | REGULATORY            |
| <i>OsMed34_1</i> | LOC_Os04g35420 | Os_chr04    | 21387088               | [G/A] | REGULATORY            |
| <i>OsMed34_1</i> | LOC_Os04g35420 | Os_chr04    | 21387083               | [G/A] | REGULATORY            |
| <i>OsMed34_1</i> | LOC_Os04g35420 | Os_chr04    | 21387082               | [C/T] | REGULATORY            |
| <i>OsMed34_1</i> | LOC_Os04g35420 | Os_chr04    | 21387081               | [G/A] | REGULATORY            |
| <i>OsMed34_1</i> | LOC_Os04g35420 | Os_chr04    | 21387077               | [A/C] | REGULATORY            |
| <i>OsMed34_1</i> | LOC_Os04g35420 | Os_chr04    | 21387071               | [G/A] | REGULATORY            |
| <i>OsMed34_1</i> | LOC_Os04g35420 | Os_chr04    | 21387062               | [T/C] | REGULATORY            |
| <i>OsMed34_1</i> | LOC_Os04g35420 | Os_chr04    | 21387026               | [A/T] | REGULATORY            |
| <i>OsMed34_1</i> | LOC_Os04g35420 | Os_chr04    | 21387015               | [G/A] | REGULATORY            |
| <i>OsMed34_1</i> | LOC_Os04g35420 | Os_chr04    | 21387007               | [G/A] | REGULATORY            |
| <i>OsMed34_1</i> | LOC_Os04g35420 | Os_chr04    | 21387006               | [C/T] | REGULATORY            |
| <i>OsMed34_1</i> | LOC_Os04g35420 | Os_chr04    | 21386995               | [C/T] | REGULATORY            |

| Mediator genes   | MSU locus ID   | Chromosomes | Physical Position (bp) | SNPs  | Structural Annotation |
|------------------|----------------|-------------|------------------------|-------|-----------------------|
| <i>OsMed34_1</i> | LOC_Os04g35420 | Os_chr04    | 21386991               | [C/T] | REGULATORY            |
| <i>OsMed34_1</i> | LOC_Os04g35420 | Os_chr04    | 21386949               | [G/T] | REGULATORY            |
| <i>OsMed34_1</i> | LOC_Os04g35420 | Os_chr04    | 21386947               | [G/A] | REGULATORY            |
| <i>OsMed34_1</i> | LOC_Os04g35420 | Os_chr04    | 21386932               | [G/A] | REGULATORY            |
| <i>OsMed34_1</i> | LOC_Os04g35420 | Os_chr04    | 21386915               | [A/T] | REGULATORY            |
| <i>OsMed34_1</i> | LOC_Os04g35420 | Os_chr04    | 21386862               | [A/G] | REGULATORY            |
| <i>OsMed34_1</i> | LOC_Os04g35420 | Os_chr04    | 21386859               | [G/T] | REGULATORY            |
| <i>OsMed34_1</i> | LOC_Os04g35420 | Os_chr04    | 21386839               | [T/A] | REGULATORY            |
| <i>OsMed34_1</i> | LOC_Os04g35420 | Os_chr04    | 21386810               | [C/A] | REGULATORY            |
| <i>OsMed34_1</i> | LOC_Os04g35420 | Os_chr04    | 21386805               | [C/T] | REGULATORY            |
| <i>OsMed34_1</i> | LOC_Os04g35420 | Os_chr04    | 21386801               | [C/T] | REGULATORY            |
| <i>OsMed34_1</i> | LOC_Os04g35420 | Os_chr04    | 21386791               | [C/T] | REGULATORY            |
| <i>OsMed34_1</i> | LOC_Os04g35420 | Os_chr04    | 21386788               | [C/T] | REGULATORY            |
| <i>OsMed34_1</i> | LOC_Os04g35420 | Os_chr04    | 21386783               | [C/T] | REGULATORY            |
| <i>OsMed34_1</i> | LOC_Os04g35420 | Os_chr04    | 21386757               | [T/C] | REGULATORY            |
| <i>OsMed34_1</i> | LOC_Os04g35420 | Os_chr04    | 21386725               | [C/A] | REGULATORY            |
| <i>OsMed34_1</i> | LOC_Os04g35420 | Os_chr04    | 21386579               | [T/G] | REGULATORY            |
| <i>OsMed34_1</i> | LOC_Os04g35420 | Os_chr04    | 21386578               | [G/A] | REGULATORY            |
| <i>OsMed34_1</i> | LOC_Os04g35420 | Os_chr04    | 21386474               | [C/T] | REGULATORY            |
| <i>OsMed34_1</i> | LOC_Os04g35420 | Os_chr04    | 21383869               | [C/A] | SYNONYMOUS-CODING     |
| <i>OsMed34_1</i> | LOC_Os04g35420 | Os_chr04    | 21383818               | [G/A] | SYNONYMOUS-CODING     |
| <i>OsMed34_1</i> | LOC_Os04g35420 | Os_chr04    | 21383000               | [A/G] | SYNONYMOUS-CODING     |
| <i>OsMed34_1</i> | LOC_Os04g35420 | Os_chr04    | 21382672               | [G/A] | SYNONYMOUS-CODING     |
| <i>OsMed34_1</i> | LOC_Os04g35420 | Os_chr04    | 21381471               | [A/T] | SYNONYMOUS-CODING     |
| <i>OsMed34_1</i> | LOC_Os04g35420 | Os_chr04    | 21381299               | [C/T] | SYNONYMOUS-CODING     |
| <i>OsMed34_1</i> | LOC_Os04g35420 | Os_chr04    | 21380908               | [T/C] | SYNONYMOUS-CODING     |
| <i>OsMed34_1</i> | LOC_Os04g35420 | Os_chr04    | 21380480               | [G/A] | SYNONYMOUS-CODING     |
| <i>OsMed34_1</i> | LOC_Os04g35420 | Os_chr04    | 21378680               | [C/T] | SYNONYMOUS-CODING     |
| <i>OsMed34_1</i> | LOC_Os04g35420 | Os_chr04    | 21376119               | [G/C] | SYNONYMOUS-CODING     |
| <i>OsMed34_1</i> | LOC_Os04g35420 | Os_chr04    | 21376062               | [T/C] | SYNONYMOUS-CODING     |
| <i>OsMed34_1</i> | LOC_Os04g35420 | Os_chr04    | 21375759               | [A/G] | SYNONYMOUS-CODING     |
| <i>OsMed34_2</i> | LOC_Os11g48090 | Os_chr11    | 28477271               | [A/T] | INTRON                |
| <i>OsMed34_2</i> | LOC_Os11g48090 | Os_chr11    | 28477176               | [T/C] | INTRON                |
| <i>OsMed34_2</i> | LOC_Os11g48090 | Os_chr11    | 28477036               | [T/G] | INTRON                |
| <i>OsMed34_2</i> | LOC_Os11g48090 | Os_chr11    | 28477009               | [G/A] | INTRON                |
| <i>OsMed34_2</i> | LOC_Os11g48090 | Os_chr11    | 28476605               | [T/G] | INTRON                |
| <i>OsMed34_2</i> | LOC_Os11g48090 | Os_chr11    | 28476581               | [T/A] | INTRON                |
| <i>OsMed34_2</i> | LOC_Os11g48090 | Os_chr11    | 28476435               | [C/A] | INTRON                |
| <i>OsMed34_2</i> | LOC_Os11g48090 | Os_chr11    | 28476304               | [A/G] | INTRON                |
| <i>OsMed34_2</i> | LOC_Os11g48090 | Os_chr11    | 28476291               | [G/A] | INTRON                |
| <i>OsMed34_2</i> | LOC_Os11g48090 | Os_chr11    | 28476267               | [C/T] | INTRON                |
| <i>OsMed34_2</i> | LOC_Os11g48090 | Os_chr11    | 28476246               | [C/A] | INTRON                |
| <i>OsMed34_2</i> | LOC_Os11g48090 | Os_chr11    | 28475766               | [T/C] | INTRON                |
| <i>OsMed34_2</i> | LOC_Os11g48090 | Os_chr11    | 28475445               | [G/A] | INTRON                |
| <i>OsMed34_2</i> | LOC_Os11g48090 | Os_chr11    | 28475428               | [A/T] | INTRON                |
| <i>OsMed34_2</i> | LOC_Os11g48090 | Os_chr11    | 28475427               | [G/C] | INTRON                |
| <i>OsMed34_2</i> | LOC_Os11g48090 | Os_chr11    | 28475424               | [C/T] | INTRON                |

| Mediator genes   | MSU locus ID   | Chromosomes | Physical Position (bp) | SNPs  | Structural Annotation |
|------------------|----------------|-------------|------------------------|-------|-----------------------|
| <i>OsMed34_2</i> | LOC_Os11g48090 | Os_chr11    | 28475319               | [T/A] | INTRON                |
| <i>OsMed34_2</i> | LOC_Os11g48090 | Os_chr11    | 28475153               | [A/G] | INTRON                |
| <i>OsMed34_2</i> | LOC_Os11g48090 | Os_chr11    | 28475080               | [G/C] | INTRON                |
| <i>OsMed34_2</i> | LOC_Os11g48090 | Os_chr11    | 28475071               | [G/A] | INTRON                |
| <i>OsMed34_2</i> | LOC_Os11g48090 | Os_chr11    | 28474913               | [A/G] | INTRON                |
| <i>OsMed34_2</i> | LOC_Os11g48090 | Os_chr11    | 28474766               | [G/C] | INTRON                |
| <i>OsMed34_2</i> | LOC_Os11g48090 | Os_chr11    | 28474740               | [G/A] | INTRON                |
| <i>OsMed34_2</i> | LOC_Os11g48090 | Os_chr11    | 28474736               | [C/A] | INTRON                |
| <i>OsMed34_2</i> | LOC_Os11g48090 | Os_chr11    | 28474720               | [G/A] | INTRON                |
| <i>OsMed34_2</i> | LOC_Os11g48090 | Os_chr11    | 28474298               | [G/A] | INTRON                |
| <i>OsMed34_2</i> | LOC_Os11g48090 | Os_chr11    | 28474271               | [C/A] | INTRON                |
| <i>OsMed34_2</i> | LOC_Os11g48090 | Os_chr11    | 28474249               | [C/G] | INTRON                |
| <i>OsMed34_2</i> | LOC_Os11g48090 | Os_chr11    | 28474091               | [T/C] | INTRON                |
| <i>OsMed34_2</i> | LOC_Os11g48090 | Os_chr11    | 28473678               | [G/A] | INTRON                |
| <i>OsMed34_2</i> | LOC_Os11g48090 | Os_chr11    | 28473623               | [G/A] | INTRON                |
| <i>OsMed34_2</i> | LOC_Os11g48090 | Os_chr11    | 28473619               | [C/T] | INTRON                |
| <i>OsMed34_2</i> | LOC_Os11g48090 | Os_chr11    | 28473602               | [G/A] | INTRON                |
| <i>OsMed34_2</i> | LOC_Os11g48090 | Os_chr11    | 28473543               | [G/A] | INTRON                |
| <i>OsMed34_2</i> | LOC_Os11g48090 | Os_chr11    | 28473489               | [C/A] | INTRON                |
| <i>OsMed34_2</i> | LOC_Os11g48090 | Os_chr11    | 28473018               | [A/G] | INTRON                |
| <i>OsMed34_2</i> | LOC_Os11g48090 | Os_chr11    | 28472640               | [T/C] | INTRON                |
| <i>OsMed34_2</i> | LOC_Os11g48090 | Os_chr11    | 28472614               | [A/G] | INTRON                |
| <i>OsMed34_2</i> | LOC_Os11g48090 | Os_chr11    | 28472590               | [T/C] | INTRON                |
| <i>OsMed34_2</i> | LOC_Os11g48090 | Os_chr11    | 28472469               | [T/C] | INTRON                |
| <i>OsMed34_2</i> | LOC_Os11g48090 | Os_chr11    | 28472349               | [T/C] | INTRON                |
| <i>OsMed34_2</i> | LOC_Os11g48090 | Os_chr11    | 28472348               | [T/A] | INTRON                |
| <i>OsMed34_2</i> | LOC_Os11g48090 | Os_chr11    | 28472029               | [A/G] | INTRON                |
| <i>OsMed34_2</i> | LOC_Os11g48090 | Os_chr11    | 28471972               | [A/T] | INTRON                |
| <i>OsMed34_2</i> | LOC_Os11g48090 | Os_chr11    | 28471776               | [G/A] | INTRON                |
| <i>OsMed34_2</i> | LOC_Os11g48090 | Os_chr11    | 28471735               | [C/T] | INTRON                |
| <i>OsMed34_2</i> | LOC_Os11g48090 | Os_chr11    | 28471684               | [C/T] | INTRON                |
| <i>OsMed34_2</i> | LOC_Os11g48090 | Os_chr11    | 28471658               | [C/T] | INTRON                |
| <i>OsMed34_2</i> | LOC_Os11g48090 | Os_chr11    | 28471620               | [C/G] | INTRON                |
| <i>OsMed34_2</i> | LOC_Os11g48090 | Os_chr11    | 28471573               | [C/T] | INTRON                |
| <i>OsMed34_2</i> | LOC_Os11g48090 | Os_chr11    | 28471465               | [G/A] | INTRON                |
| <i>OsMed34_2</i> | LOC_Os11g48090 | Os_chr11    | 28471398               | [G/A] | INTRON                |
| <i>OsMed34_2</i> | LOC_Os11g48090 | Os_chr11    | 28471253               | [C/T] | INTRON                |
| <i>OsMed34_2</i> | LOC_Os11g48090 | Os_chr11    | 28471237               | [C/T] | INTRON                |
| <i>OsMed34_2</i> | LOC_Os11g48090 | Os_chr11    | 28471122               | [T/G] | INTRON                |
| <i>OsMed34_2</i> | LOC_Os11g48090 | Os_chr11    | 28470818               | [A/G] | INTRON                |
| <i>OsMed34_2</i> | LOC_Os11g48090 | Os_chr11    | 28470675               | [G/A] | INTRON                |
| <i>OsMed34_2</i> | LOC_Os11g48090 | Os_chr11    | 28470619               | [C/T] | INTRON                |
| <i>OsMed34_2</i> | LOC_Os11g48090 | Os_chr11    | 28470604               | [C/A] | INTRON                |
| <i>OsMed34_2</i> | LOC_Os11g48090 | Os_chr11    | 28470275               | [T/A] | INTRON                |
| <i>OsMed34_2</i> | LOC_Os11g48090 | Os_chr11    | 28470076               | [T/A] | INTRON                |
| <i>OsMed34_2</i> | LOC_Os11g48090 | Os_chr11    | 28470058               | [A/G] | INTRON                |
| <i>OsMed34_2</i> | LOC_Os11g48090 | Os_chr11    | 28470046               | [G/A] | INTRON                |



| Mediator genes   | MSU locus ID   | Chromosomes | Physical Position (bp) | SNPs  | Structural Annotation |
|------------------|----------------|-------------|------------------------|-------|-----------------------|
| <i>OsMed34_2</i> | LOC_Os11g48090 | Os_chr11    | 28469664               | [C/A] | INTRON                |
| <i>OsMed34_2</i> | LOC_Os11g48090 | Os_chr11    | 28469288               | [G/C] | INTRON                |
| <i>OsMed34_2</i> | LOC_Os11g48090 | Os_chr11    | 28468721               | [C/A] | INTRON                |
| <i>OsMed34_2</i> | LOC_Os11g48090 | Os_chr11    | 28468314               | [T/C] | INTRON                |
| <i>OsMed34_2</i> | LOC_Os11g48090 | Os_chr11    | 28468074               | [T/C] | INTRON                |
| <i>OsMed34_2</i> | LOC_Os11g48090 | Os_chr11    | 28467910               | [G/C] | INTRON                |
| <i>OsMed34_2</i> | LOC_Os11g48090 | Os_chr11    | 28467682               | [T/C] | INTRON                |
| <i>OsMed34_2</i> | LOC_Os11g48090 | Os_chr11    | 28467512               | [C/A] | INTRON                |
| <i>OsMed34_2</i> | LOC_Os11g48090 | Os_chr11    | 28467320               | [A/G] | INTRON                |
| <i>OsMed34_2</i> | LOC_Os11g48090 | Os_chr11    | 28467313               | [T/C] | INTRON                |
| <i>OsMed34_2</i> | LOC_Os11g48090 | Os_chr11    | 28467294               | [G/T] | INTRON                |
| <i>OsMed34_2</i> | LOC_Os11g48090 | Os_chr11    | 28467108               | [G/A] | INTRON                |
| <i>OsMed34_2</i> | LOC_Os11g48090 | Os_chr11    | 28467104               | [C/T] | INTRON                |
| <i>OsMed34_2</i> | LOC_Os11g48090 | Os_chr11    | 28467101               | [G/T] | INTRON                |
| <i>OsMed34_2</i> | LOC_Os11g48090 | Os_chr11    | 28467004               | [A/T] | INTRON                |
| <i>OsMed34_2</i> | LOC_Os11g48090 | Os_chr11    | 28466990               | [G/C] | INTRON                |
| <i>OsMed34_2</i> | LOC_Os11g48090 | Os_chr11    | 28466596               | [T/A] | INTRON                |
| <i>OsMed34_2</i> | LOC_Os11g48090 | Os_chr11    | 28466589               | [T/C] | INTRON                |
| <i>OsMed34_2</i> | LOC_Os11g48090 | Os_chr11    | 28468481               | [C/A] | NON-SYNONYMOUS-CODING |
| <i>OsMed34_2</i> | LOC_Os11g48090 | Os_chr11    | 28474560               | [C/G] | NON-SYNONYMOUS-CODING |
| <i>OsMed34_2</i> | LOC_Os11g48090 | Os_chr11    | 28473794               | [C/T] | NON-SYNONYMOUS-CODING |
| <i>OsMed34_2</i> | LOC_Os11g48090 | Os_chr11    | 28473257               | [G/A] | NON-SYNONYMOUS-CODING |
| <i>OsMed34_2</i> | LOC_Os11g48090 | Os_chr11    | 28472227               | [C/T] | NON-SYNONYMOUS-CODING |
| <i>OsMed34_2</i> | LOC_Os11g48090 | Os_chr11    | 28472217               | [T/A] | NON-SYNONYMOUS-CODING |
| <i>OsMed34_2</i> | LOC_Os11g48090 | Os_chr11    | 28467148               | [T/G] | NON-SYNONYMOUS-CODING |
| <i>OsMed34_2</i> | LOC_Os11g48090 | Os_chr11    | 28466536               | [A/C] | NON-SYNONYMOUS-CODING |
| <i>OsMed34_2</i> | LOC_Os11g48090 | Os_chr11    | 28466495               | [C/T] | NON-SYNONYMOUS-CODING |
| <i>OsMed34_2</i> | LOC_Os11g48090 | Os_chr11    | 28466452               | [C/T] | NON-SYNONYMOUS-CODING |
| <i>OsMed34_2</i> | LOC_Os11g48090 | Os_chr11    | 28477658               | [G/T] | REGULATORY            |
| <i>OsMed34_2</i> | LOC_Os11g48090 | Os_chr11    | 28477548               | [C/T] | REGULATORY            |
| <i>OsMed34_2</i> | LOC_Os11g48090 | Os_chr11    | 28477524               | [G/C] | REGULATORY            |
| <i>OsMed34_2</i> | LOC_Os11g48090 | Os_chr11    | 28477466               | [G/A] | REGULATORY            |
| <i>OsMed34_2</i> | LOC_Os11g48090 | Os_chr11    | 28477410               | [G/A] | REGULATORY            |
| <i>OsMed34_2</i> | LOC_Os11g48090 | Os_chr11    | 28477684               | [T/C] | REGULATORY            |
| <i>OsMed34_2</i> | LOC_Os11g48090 | Os_chr11    | 28466388               | [G/C] | REGULATORY            |
| <i>OsMed34_2</i> | LOC_Os11g48090 | Os_chr11    | 28466303               | [G/A] | REGULATORY            |
| <i>OsMed34_2</i> | LOC_Os11g48090 | Os_chr11    | 28478684               | [C/T] | REGULATORY            |
| <i>OsMed34_2</i> | LOC_Os11g48090 | Os_chr11    | 28478651               | [C/T] | REGULATORY            |
| <i>OsMed34_2</i> | LOC_Os11g48090 | Os_chr11    | 28478611               | [C/T] | REGULATORY            |
| <i>OsMed34_2</i> | LOC_Os11g48090 | Os_chr11    | 28478573               | [C/T] | REGULATORY            |
| <i>OsMed34_2</i> | LOC_Os11g48090 | Os_chr11    | 28478570               | [G/T] | REGULATORY            |
| <i>OsMed34_2</i> | LOC_Os11g48090 | Os_chr11    | 28478544               | [G/T] | REGULATORY            |
| <i>OsMed34_2</i> | LOC_Os11g48090 | Os_chr11    | 28478510               | [C/T] | REGULATORY            |
| <i>OsMed34_2</i> | LOC_Os11g48090 | Os_chr11    | 28478505               | [T/G] | REGULATORY            |
| <i>OsMed34_2</i> | LOC_Os11g48090 | Os_chr11    | 28478500               | [G/A] | REGULATORY            |
| <i>OsMed34_2</i> | LOC_Os11g48090 | Os_chr11    | 28478495               | [G/A] | REGULATORY            |
| <i>OsMed34_2</i> | LOC_Os11g48090 | Os_chr11    | 28478488               | [G/A] | REGULATORY            |

| Mediator genes   | MSU locus ID   | Chromosomes | Physical Position (bp) | SNPs  | Structural Annotation |
|------------------|----------------|-------------|------------------------|-------|-----------------------|
| <i>OsMed34_2</i> | LOC_Os11g48090 | Os_chr11    | 28478482               | [C/T] | REGULATORY            |
| <i>OsMed34_2</i> | LOC_Os11g48090 | Os_chr11    | 28478470               | [G/A] | REGULATORY            |
| <i>OsMed34_2</i> | LOC_Os11g48090 | Os_chr11    | 28478445               | [G/T] | REGULATORY            |
| <i>OsMed34_2</i> | LOC_Os11g48090 | Os_chr11    | 28478435               | [G/A] | REGULATORY            |
| <i>OsMed34_2</i> | LOC_Os11g48090 | Os_chr11    | 28478422               | [C/T] | REGULATORY            |
| <i>OsMed34_2</i> | LOC_Os11g48090 | Os_chr11    | 28478407               | [A/G] | REGULATORY            |
| <i>OsMed34_2</i> | LOC_Os11g48090 | Os_chr11    | 28478404               | [G/A] | REGULATORY            |
| <i>OsMed34_2</i> | LOC_Os11g48090 | Os_chr11    | 28478383               | [A/C] | REGULATORY            |
| <i>OsMed34_2</i> | LOC_Os11g48090 | Os_chr11    | 28478380               | [T/C] | REGULATORY            |
| <i>OsMed34_2</i> | LOC_Os11g48090 | Os_chr11    | 28478373               | [T/A] | REGULATORY            |
| <i>OsMed34_2</i> | LOC_Os11g48090 | Os_chr11    | 28478355               | [A/C] | REGULATORY            |
| <i>OsMed34_2</i> | LOC_Os11g48090 | Os_chr11    | 28478328               | [C/T] | REGULATORY            |
| <i>OsMed34_2</i> | LOC_Os11g48090 | Os_chr11    | 28478316               | [G/A] | REGULATORY            |
| <i>OsMed34_2</i> | LOC_Os11g48090 | Os_chr11    | 28478296               | [G/A] | REGULATORY            |
| <i>OsMed34_2</i> | LOC_Os11g48090 | Os_chr11    | 28478278               | [C/A] | REGULATORY            |
| <i>OsMed34_2</i> | LOC_Os11g48090 | Os_chr11    | 28478277               | [A/C] | REGULATORY            |
| <i>OsMed34_2</i> | LOC_Os11g48090 | Os_chr11    | 28478223               | [C/T] | REGULATORY            |
| <i>OsMed34_2</i> | LOC_Os11g48090 | Os_chr11    | 28478096               | [G/A] | REGULATORY            |
| <i>OsMed34_2</i> | LOC_Os11g48090 | Os_chr11    | 28478072               | [C/T] | REGULATORY            |
| <i>OsMed34_2</i> | LOC_Os11g48090 | Os_chr11    | 28478028               | [G/T] | REGULATORY            |
| <i>OsMed34_2</i> | LOC_Os11g48090 | Os_chr11    | 28478025               | [G/T] | REGULATORY            |
| <i>OsMed34_2</i> | LOC_Os11g48090 | Os_chr11    | 28477942               | [C/T] | REGULATORY            |
| <i>OsMed34_2</i> | LOC_Os11g48090 | Os_chr11    | 28477936               | [G/A] | REGULATORY            |
| <i>OsMed34_2</i> | LOC_Os11g48090 | Os_chr11    | 28477926               | [G/A] | REGULATORY            |
| <i>OsMed34_2</i> | LOC_Os11g48090 | Os_chr11    | 28477899               | [G/T] | REGULATORY            |
| <i>OsMed34_2</i> | LOC_Os11g48090 | Os_chr11    | 28477897               | [G/A] | REGULATORY            |
| <i>OsMed34_2</i> | LOC_Os11g48090 | Os_chr11    | 28477895               | [G/A] | REGULATORY            |
| <i>OsMed34_2</i> | LOC_Os11g48090 | Os_chr11    | 28477864               | [C/T] | REGULATORY            |
| <i>OsMed34_2</i> | LOC_Os11g48090 | Os_chr11    | 28477855               | [C/T] | REGULATORY            |
| <i>OsMed34_2</i> | LOC_Os11g48090 | Os_chr11    | 28477710               | [A/G] | REGULATORY            |
| <i>OsMed34_2</i> | LOC_Os11g48090 | Os_chr11    | 28468468               | [G/A] | SYNONYMOUS-CODING     |
| <i>OsMed34_2</i> | LOC_Os11g48090 | Os_chr11    | 28474564               | [A/C] | SYNONYMOUS-CODING     |
| <i>OsMed34_2</i> | LOC_Os11g48090 | Os_chr11    | 28474510               | [A/T] | SYNONYMOUS-CODING     |
| <i>OsMed34_2</i> | LOC_Os11g48090 | Os_chr11    | 28473292               | [A/G] | SYNONYMOUS-CODING     |
| <i>OsMed34_2</i> | LOC_Os11g48090 | Os_chr11    | 28473256               | [C/T] | SYNONYMOUS-CODING     |
| <i>OsMed34_2</i> | LOC_Os11g48090 | Os_chr11    | 28469429               | [A/C] | SYNONYMOUS-CODING     |
| <i>OsMed34_2</i> | LOC_Os11g48090 | Os_chr11    | 28468420               | [G/A] | SYNONYMOUS-CODING     |
| <i>OsMed34_2</i> | LOC_Os11g48090 | Os_chr11    | 28466496               | [A/G] | SYNONYMOUS-CODING     |
| <i>OsMed34_2</i> | LOC_Os11g48090 | Os_chr11    | 28466493               | [G/A] | SYNONYMOUS-CODING     |
| <i>OsMed35_1</i> | LOC_Os10g34380 | Os_chr10    | 18259575               | [C/T] | INTRON                |
| <i>OsMed35_1</i> | LOC_Os10g34380 | Os_chr10    | 18259346               | [A/G] | INTRON                |
| <i>OsMed35_1</i> | LOC_Os10g34380 | Os_chr10    | 18259220               | [G/A] | INTRON                |
| <i>OsMed35_1</i> | LOC_Os10g34380 | Os_chr10    | 18259045               | [G/A] | INTRON                |
| <i>OsMed35_1</i> | LOC_Os10g34380 | Os_chr10    | 18259010               | [A/G] | INTRON                |
| <i>OsMed35_1</i> | LOC_Os10g34380 | Os_chr10    | 18258960               | [T/C] | INTRON                |
| <i>OsMed35_1</i> | LOC_Os10g34380 | Os_chr10    | 18258937               | [G/A] | INTRON                |
| <i>OsMed35_1</i> | LOC_Os10g34380 | Os_chr10    | 18258588               | [A/G] | INTRON                |

| Mediator genes   | MSU locus ID   | Chromosomes | Physical Position (bp) | SNPs  | Structural Annotation |
|------------------|----------------|-------------|------------------------|-------|-----------------------|
| <i>OsMed35_1</i> | LOC_Os10g34380 | Os_chr10    | 18257034               | [A/G] | INTRON                |
| <i>OsMed35_1</i> | LOC_Os10g34380 | Os_chr10    | 18256652               | [T/A] | INTRON                |
| <i>OsMed35_1</i> | LOC_Os10g34380 | Os_chr10    | 18256549               | [G/A] | INTRON                |
| <i>OsMed35_1</i> | LOC_Os10g34380 | Os_chr10    | 18256498               | [C/G] | INTRON                |
| <i>OsMed35_1</i> | LOC_Os10g34380 | Os_chr10    | 18256496               | [C/T] | INTRON                |
| <i>OsMed35_1</i> | LOC_Os10g34380 | Os_chr10    | 18256369               | [C/T] | INTRON                |
| <i>OsMed35_1</i> | LOC_Os10g34380 | Os_chr10    | 18256314               | [T/C] | INTRON                |
| <i>OsMed35_1</i> | LOC_Os10g34380 | Os_chr10    | 18256196               | [G/A] | INTRON                |
| <i>OsMed35_1</i> | LOC_Os10g34380 | Os_chr10    | 18254291               | [A/C] | INTRON                |
| <i>OsMed35_1</i> | LOC_Os10g34380 | Os_chr10    | 18254183               | [C/T] | INTRON                |
| <i>OsMed35_1</i> | LOC_Os10g34380 | Os_chr10    | 18254151               | [A/G] | INTRON                |
| <i>OsMed35_1</i> | LOC_Os10g34380 | Os_chr10    | 18254113               | [G/A] | INTRON                |
| <i>OsMed35_1</i> | LOC_Os10g34380 | Os_chr10    | 18253983               | [A/T] | INTRON                |
| <i>OsMed35_1</i> | LOC_Os10g34380 | Os_chr10    | 18253836               | [T/G] | INTRON                |
| <i>OsMed35_1</i> | LOC_Os10g34380 | Os_chr10    | 18253733               | [G/A] | INTRON                |
| <i>OsMed35_1</i> | LOC_Os10g34380 | Os_chr10    | 18253729               | [G/A] | INTRON                |
| <i>OsMed35_1</i> | LOC_Os10g34380 | Os_chr10    | 18253405               | [C/A] | INTRON                |
| <i>OsMed35_1</i> | LOC_Os10g34380 | Os_chr10    | 18253180               | [G/A] | INTRON                |
| <i>OsMed35_1</i> | LOC_Os10g34380 | Os_chr10    | 18252980               | [A/G] | INTRON                |
| <i>OsMed35_1</i> | LOC_Os10g34380 | Os_chr10    | 18252956               | [C/A] | INTRON                |
| <i>OsMed35_1</i> | LOC_Os10g34380 | Os_chr10    | 18252485               | [G/A] | INTRON                |
| <i>OsMed35_1</i> | LOC_Os10g34380 | Os_chr10    | 18252453               | [G/A] | INTRON                |
| <i>OsMed35_1</i> | LOC_Os10g34380 | Os_chr10    | 18252113               | [G/A] | INTRON                |
| <i>OsMed35_1</i> | LOC_Os10g34380 | Os_chr10    | 18251966               | [T/C] | INTRON                |
| <i>OsMed35_1</i> | LOC_Os10g34380 | Os_chr10    | 18251719               | [C/T] | INTRON                |
| <i>OsMed35_1</i> | LOC_Os10g34380 | Os_chr10    | 18251697               | [C/T] | INTRON                |
| <i>OsMed35_1</i> | LOC_Os10g34380 | Os_chr10    | 18251513               | [G/T] | INTRON                |
| <i>OsMed35_1</i> | LOC_Os10g34380 | Os_chr10    | 18251319               | [C/T] | INTRON                |
| <i>OsMed35_1</i> | LOC_Os10g34380 | Os_chr10    | 18251202               | [T/C] | INTRON                |
| <i>OsMed35_1</i> | LOC_Os10g34380 | Os_chr10    | 18250994               | [T/A] | INTRON                |
| <i>OsMed35_1</i> | LOC_Os10g34380 | Os_chr10    | 18250982               | [G/C] | INTRON                |
| <i>OsMed35_1</i> | LOC_Os10g34380 | Os_chr10    | 18250162               | [G/A] | INTRON                |
| <i>OsMed35_1</i> | LOC_Os10g34380 | Os_chr10    | 18260166               | [A/G] | NON-SYNONYMOUS-CODING |
| <i>OsMed35_1</i> | LOC_Os10g34380 | Os_chr10    | 18258021               | [C/T] | NON-SYNONYMOUS-CODING |
| <i>OsMed35_1</i> | LOC_Os10g34380 | Os_chr10    | 18249910               | [T/C] | NON-SYNONYMOUS-CODING |
| <i>OsMed35_1</i> | LOC_Os10g34380 | Os_chr10    | 18260267               | [G/A] | REGULATORY            |
| <i>OsMed35_1</i> | LOC_Os10g34380 | Os_chr10    | 18258510               | [G/T] | SYNONYMOUS-CODING     |
| <i>OsMed35_1</i> | LOC_Os10g34380 | Os_chr10    | 18258154               | [G/A] | SYNONYMOUS-CODING     |
| <i>OsMed35_1</i> | LOC_Os10g34380 | Os_chr10    | 18257917               | [C/A] | SYNONYMOUS-CODING     |
| <i>OsMed35_1</i> | LOC_Os10g34380 | Os_chr10    | 18257758               | [C/A] | SYNONYMOUS-CODING     |
| <i>OsMed35_1</i> | LOC_Os10g34380 | Os_chr10    | 18257440               | [T/C] | SYNONYMOUS-CODING     |
| <i>OsMed35_1</i> | LOC_Os10g34380 | Os_chr10    | 18250895               | [T/C] | SYNONYMOUS-CODING     |
| <i>OsMed35_1</i> | LOC_Os10g34380 | Os_chr10    | 18250008               | [G/A] | SYNONYMOUS-CODING     |
| <i>OsMed35_1</i> | LOC_Os10g34380 | Os_chr10    | 18260979               | [T/C] | REGULATORY            |
| <i>OsMed35_1</i> | LOC_Os10g34380 | Os_chr10    | 18260963               | [C/T] | REGULATORY            |
| <i>OsMed35_1</i> | LOC_Os10g34380 | Os_chr10    | 18260957               | [C/T] | REGULATORY            |
| <i>OsMed35_1</i> | LOC_Os10g34380 | Os_chr10    | 18260944               | [A/T] | REGULATORY            |

| Mediator genes   | MSU locus ID   | Chromosomes | Physical Position (bp) | SNPs  | Structural Annotation |
|------------------|----------------|-------------|------------------------|-------|-----------------------|
| <i>OsMed35_1</i> | LOC_Os10g34380 | Os_chr10    | 18260918               | [C/T] | REGULATORY            |
| <i>OsMed35_1</i> | LOC_Os10g34380 | Os_chr10    | 18260856               | [T/G] | REGULATORY            |
| <i>OsMed35_1</i> | LOC_Os10g34380 | Os_chr10    | 18260846               | [A/G] | REGULATORY            |
| <i>OsMed35_1</i> | LOC_Os10g34380 | Os_chr10    | 18260845               | [C/T] | REGULATORY            |
| <i>OsMed35_1</i> | LOC_Os10g34380 | Os_chr10    | 18260838               | [A/G] | REGULATORY            |
| <i>OsMed35_1</i> | LOC_Os10g34380 | Os_chr10    | 18260794               | [G/A] | REGULATORY            |
| <i>OsMed35_1</i> | LOC_Os10g34380 | Os_chr10    | 18260785               | [C/T] | REGULATORY            |
| <i>OsMed35_1</i> | LOC_Os10g34380 | Os_chr10    | 18260741               | [A/G] | REGULATORY            |
| <i>OsMed35_1</i> | LOC_Os10g34380 | Os_chr10    | 18260725               | [G/T] | REGULATORY            |
| <i>OsMed35_1</i> | LOC_Os10g34380 | Os_chr10    | 18260701               | [C/T] | REGULATORY            |
| <i>OsMed35_1</i> | LOC_Os10g34380 | Os_chr10    | 18260654               | [G/T] | REGULATORY            |
| <i>OsMed35_1</i> | LOC_Os10g34380 | Os_chr10    | 18260627               | [G/A] | REGULATORY            |
| <i>OsMed35_1</i> | LOC_Os10g34380 | Os_chr10    | 18260586               | [C/T] | REGULATORY            |
| <i>OsMed35_1</i> | LOC_Os10g34380 | Os_chr10    | 18260535               | [C/T] | REGULATORY            |
| <i>OsMed35_1</i> | LOC_Os10g34380 | Os_chr10    | 18260506               | [G/A] | REGULATORY            |
| <i>OsMed35_1</i> | LOC_Os10g34380 | Os_chr10    | 18260454               | [C/T] | REGULATORY            |
| <i>OsMed35_1</i> | LOC_Os10g34380 | Os_chr10    | 18260380               | [C/T] | REGULATORY            |
| <i>OsMed36_1</i> | LOC_Os02g57590 | Os_chr02    | 35266835               | [G/A] | INTRON                |
| <i>OsMed36_1</i> | LOC_Os02g57590 | Os_chr02    | 35266697               | [T/C] | INTRON                |
| <i>OsMed36_1</i> | LOC_Os02g57590 | Os_chr02    | 35266659               | [A/T] | INTRON                |
| <i>OsMed36_1</i> | LOC_Os02g57590 | Os_chr02    | 35266428               | [T/C] | INTRON                |
| <i>OsMed36_1</i> | LOC_Os02g57590 | Os_chr02    | 35266419               | [G/A] | INTRON                |
| <i>OsMed36_1</i> | LOC_Os02g57590 | Os_chr02    | 35265926               | [T/C] | INTRON                |
| <i>OsMed36_1</i> | LOC_Os02g57590 | Os_chr02    | 35265920               | [C/T] | INTRON                |
| <i>OsMed36_1</i> | LOC_Os02g57590 | Os_chr02    | 35267671               | [G/A] | INTRON                |
| <i>OsMed36_1</i> | LOC_Os02g57590 | Os_chr02    | 35267619               | [T/A] | INTRON                |
| <i>OsMed36_1</i> | LOC_Os02g57590 | Os_chr02    | 35267531               | [A/G] | INTRON                |
| <i>OsMed36_1</i> | LOC_Os02g57590 | Os_chr02    | 35267487               | [T/G] | INTRON                |
| <i>OsMed36_1</i> | LOC_Os02g57590 | Os_chr02    | 35267212               | [C/T] | INTRON                |
| <i>OsMed36_1</i> | LOC_Os02g57590 | Os_chr02    | 35265782               | [G/T] | REGULATORY            |
| <i>OsMed36_1</i> | LOC_Os02g57590 | Os_chr02    | 35267880               | [G/A] | REGULATORY            |
| <i>OsMed36_1</i> | LOC_Os02g57590 | Os_chr02    | 35268423               | [A/G] | REGULATORY            |
| <i>OsMed36_1</i> | LOC_Os02g57590 | Os_chr02    | 35265693               | [C/T] | REGULATORY            |
| <i>OsMed36_1</i> | LOC_Os02g57590 | Os_chr02    | 35265626               | [G/A] | REGULATORY            |
| <i>OsMed36_1</i> | LOC_Os02g57590 | Os_chr02    | 35265594               | [C/A] | REGULATORY            |
| <i>OsMed36_1</i> | LOC_Os02g57590 | Os_chr02    | 35265593               | [G/A] | REGULATORY            |
| <i>OsMed36_1</i> | LOC_Os02g57590 | Os_chr02    | 35265581               | [T/C] | REGULATORY            |
| <i>OsMed36_1</i> | LOC_Os02g57590 | Os_chr02    | 35265573               | [C/G] | REGULATORY            |
| <i>OsMed36_1</i> | LOC_Os02g57590 | Os_chr02    | 35265539               | [T/C] | REGULATORY            |
| <i>OsMed36_1</i> | LOC_Os02g57590 | Os_chr02    | 35265495               | [G/T] | REGULATORY            |
| <i>OsMed36_1</i> | LOC_Os02g57590 | Os_chr02    | 35265446               | [T/C] | REGULATORY            |
| <i>OsMed36_1</i> | LOC_Os02g57590 | Os_chr02    | 35265427               | [C/T] | REGULATORY            |
| <i>OsMed36_1</i> | LOC_Os02g57590 | Os_chr02    | 35265339               | [G/A] | REGULATORY            |
| <i>OsMed36_1</i> | LOC_Os02g57590 | Os_chr02    | 35265336               | [A/T] | REGULATORY            |
| <i>OsMed36_1</i> | LOC_Os02g57590 | Os_chr02    | 35265270               | [C/T] | REGULATORY            |
| <i>OsMed36_1</i> | LOC_Os02g57590 | Os_chr02    | 35265269               | [A/C] | REGULATORY            |
| <i>OsMed36_1</i> | LOC_Os02g57590 | Os_chr02    | 35265268               | [C/T] | REGULATORY            |

| Mediator genes   | MSU locus ID   | Chromosomes | Physical Position (bp) | SNPs  | Structural Annotation |
|------------------|----------------|-------------|------------------------|-------|-----------------------|
| <i>OsMed36_1</i> | LOC_Os02g57590 | Os_chr02    | 35265258               | [C/T] | REGULATORY            |
| <i>OsMed36_1</i> | LOC_Os02g57590 | Os_chr02    | 35265247               | [G/A] | REGULATORY            |
| <i>OsMed36_1</i> | LOC_Os02g57590 | Os_chr02    | 35265227               | [G/A] | REGULATORY            |
| <i>OsMed36_1</i> | LOC_Os02g57590 | Os_chr02    | 35265206               | [T/A] | REGULATORY            |
| <i>OsMed36_1</i> | LOC_Os02g57590 | Os_chr02    | 35265204               | [C/T] | REGULATORY            |
| <i>OsMed36_1</i> | LOC_Os02g57590 | Os_chr02    | 35265199               | [G/A] | REGULATORY            |
| <i>OsMed36_1</i> | LOC_Os02g57590 | Os_chr02    | 35265187               | [A/G] | REGULATORY            |
| <i>OsMed36_1</i> | LOC_Os02g57590 | Os_chr02    | 35265162               | [G/A] | REGULATORY            |
| <i>OsMed36_1</i> | LOC_Os02g57590 | Os_chr02    | 35265158               | [T/A] | REGULATORY            |
| <i>OsMed36_1</i> | LOC_Os02g57590 | Os_chr02    | 35265145               | [C/G] | REGULATORY            |
| <i>OsMed36_1</i> | LOC_Os02g57590 | Os_chr02    | 35265143               | [C/T] | REGULATORY            |
| <i>OsMed36_1</i> | LOC_Os02g57590 | Os_chr02    | 35265131               | [G/T] | REGULATORY            |
| <i>OsMed36_1</i> | LOC_Os02g57590 | Os_chr02    | 35265128               | [G/A] | REGULATORY            |
| <i>OsMed36_1</i> | LOC_Os02g57590 | Os_chr02    | 35265122               | [G/A] | REGULATORY            |
| <i>OsMed36_1</i> | LOC_Os02g57590 | Os_chr02    | 35265120               | [G/A] | REGULATORY            |
| <i>OsMed36_1</i> | LOC_Os02g57590 | Os_chr02    | 35265115               | [C/T] | REGULATORY            |
| <i>OsMed36_1</i> | LOC_Os02g57590 | Os_chr02    | 35265110               | [T/C] | REGULATORY            |
| <i>OsMed36_1</i> | LOC_Os02g57590 | Os_chr02    | 35265107               | [C/G] | REGULATORY            |
| <i>OsMed36_1</i> | LOC_Os02g57590 | Os_chr02    | 35265094               | [G/A] | REGULATORY            |
| <i>OsMed36_1</i> | LOC_Os02g57590 | Os_chr02    | 35265074               | [G/C] | REGULATORY            |
| <i>OsMed36_1</i> | LOC_Os02g57590 | Os_chr02    | 35265063               | [G/A] | REGULATORY            |
| <i>OsMed36_1</i> | LOC_Os02g57590 | Os_chr02    | 35265057               | [C/T] | REGULATORY            |
| <i>OsMed36_1</i> | LOC_Os02g57590 | Os_chr02    | 35265046               | [G/A] | REGULATORY            |
| <i>OsMed36_1</i> | LOC_Os02g57590 | Os_chr02    | 35265039               | [T/C] | REGULATORY            |
| <i>OsMed36_1</i> | LOC_Os02g57590 | Os_chr02    | 35265036               | [G/A] | REGULATORY            |
| <i>OsMed36_1</i> | LOC_Os02g57590 | Os_chr02    | 35265030               | [C/T] | REGULATORY            |
| <i>OsMed36_1</i> | LOC_Os02g57590 | Os_chr02    | 35265005               | [C/T] | REGULATORY            |
| <i>OsMed36_1</i> | LOC_Os02g57590 | Os_chr02    | 35265004               | [G/A] | REGULATORY            |
| <i>OsMed36_1</i> | LOC_Os02g57590 | Os_chr02    | 35264981               | [G/A] | REGULATORY            |
| <i>OsMed36_1</i> | LOC_Os02g57590 | Os_chr02    | 35264978               | [A/G] | REGULATORY            |
| <i>OsMed36_1</i> | LOC_Os02g57590 | Os_chr02    | 35264967               | [A/C] | REGULATORY            |
| <i>OsMed36_1</i> | LOC_Os02g57590 | Os_chr02    | 35264959               | [T/A] | REGULATORY            |
| <i>OsMed36_1</i> | LOC_Os02g57590 | Os_chr02    | 35264955               | [A/G] | REGULATORY            |
| <i>OsMed36_1</i> | LOC_Os02g57590 | Os_chr02    | 35264950               | [C/T] | REGULATORY            |
| <i>OsMed36_1</i> | LOC_Os02g57590 | Os_chr02    | 35264939               | [C/T] | REGULATORY            |
| <i>OsMed36_1</i> | LOC_Os02g57590 | Os_chr02    | 35264835               | [C/A] | REGULATORY            |
| <i>OsMed36_1</i> | LOC_Os02g57590 | Os_chr02    | 35264821               | [A/G] | REGULATORY            |
| <i>OsMed36_1</i> | LOC_Os02g57590 | Os_chr02    | 35264721               | [C/T] | REGULATORY            |
| <i>OsMed36_1</i> | LOC_Os02g57590 | Os_chr02    | 35266731               | [C/T] | SYNONYMOUS-CODING     |
| <i>OsMed36_1</i> | LOC_Os02g57590 | Os_chr02    | 35266723               | [C/T] | SYNONYMOUS-CODING     |
| <i>OsMed36_1</i> | LOC_Os02g57590 | Os_chr02    | 35266541               | [C/T] | SYNONYMOUS-CODING     |
| <i>OsMed36_1</i> | LOC_Os02g57590 | Os_chr02    | 35266234               | [C/T] | SYNONYMOUS-CODING     |
| <i>OsMed36_1</i> | LOC_Os02g57590 | Os_chr02    | 35266069               | [T/C] | SYNONYMOUS-CODING     |
| <i>OsMed36_2</i> | LOC_Os05g08360 | Os_chr05    | 4561760                | [T/A] | INTRON                |
| <i>OsMed36_2</i> | LOC_Os05g08360 | Os_chr05    | 4561676                | [T/G] | INTRON                |
| <i>OsMed36_2</i> | LOC_Os05g08360 | Os_chr05    | 4561665                | [A/C] | INTRON                |
| <i>OsMed36_2</i> | LOC_Os05g08360 | Os_chr05    | 4561648                | [T/C] | INTRON                |

| Mediator genes   | MSU locus ID   | Chromosomes | Physical Position (bp) | SNPs  | Structural Annotation |
|------------------|----------------|-------------|------------------------|-------|-----------------------|
| <i>OsMed36_2</i> | LOC_Os05g08360 | Os_chr05    | 4561344                | [A/C] | INTRON                |
| <i>OsMed36_2</i> | LOC_Os05g08360 | Os_chr05    | 4561321                | [G/T] | INTRON                |
| <i>OsMed36_2</i> | LOC_Os05g08360 | Os_chr05    | 4561247                | [G/A] | INTRON                |
| <i>OsMed36_2</i> | LOC_Os05g08360 | Os_chr05    | 4561195                | [A/G] | INTRON                |
| <i>OsMed36_2</i> | LOC_Os05g08360 | Os_chr05    | 4560994                | [T/G] | INTRON                |
| <i>OsMed36_2</i> | LOC_Os05g08360 | Os_chr05    | 4560953                | [G/T] | INTRON                |
| <i>OsMed36_2</i> | LOC_Os05g08360 | Os_chr05    | 4560939                | [G/T] | INTRON                |
| <i>OsMed36_2</i> | LOC_Os05g08360 | Os_chr05    | 4560901                | [T/C] | INTRON                |
| <i>OsMed36_2</i> | LOC_Os05g08360 | Os_chr05    | 4560852                | [G/T] | INTRON                |
| <i>OsMed36_2</i> | LOC_Os05g08360 | Os_chr05    | 4560793                | [G/A] | INTRON                |
| <i>OsMed36_2</i> | LOC_Os05g08360 | Os_chr05    | 4560393                | [T/C] | INTRON                |
| <i>OsMed36_2</i> | LOC_Os05g08360 | Os_chr05    | 4560373                | [T/A] | INTRON                |
| <i>OsMed36_2</i> | LOC_Os05g08360 | Os_chr05    | 4560344                | [T/A] | INTRON                |
| <i>OsMed36_2</i> | LOC_Os05g08360 | Os_chr05    | 4560235                | [T/G] | INTRON                |
| <i>OsMed36_2</i> | LOC_Os05g08360 | Os_chr05    | 4559964                | [T/C] | INTRON                |
| <i>OsMed36_2</i> | LOC_Os05g08360 | Os_chr05    | 4559887                | [A/G] | INTRON                |
| <i>OsMed36_2</i> | LOC_Os05g08360 | Os_chr05    | 4559868                | [A/G] | INTRON                |
| <i>OsMed36_2</i> | LOC_Os05g08360 | Os_chr05    | 4559728                | [A/C] | INTRON                |
| <i>OsMed36_2</i> | LOC_Os05g08360 | Os_chr05    | 4559287                | [T/C] | REGULATORY            |
| <i>OsMed36_2</i> | LOC_Os05g08360 | Os_chr05    | 4559260                | [G/C] | REGULATORY            |
| <i>OsMed36_2</i> | LOC_Os05g08360 | Os_chr05    | 4561992                | [A/T] | REGULATORY            |
| <i>OsMed36_2</i> | LOC_Os05g08360 | Os_chr05    | 4562303                | [A/G] | REGULATORY            |
| <i>OsMed36_2</i> | LOC_Os05g08360 | Os_chr05    | 4562263                | [C/T] | REGULATORY            |
| <i>OsMed36_2</i> | LOC_Os05g08360 | Os_chr05    | 4559199                | [C/T] | REGULATORY            |
| <i>OsMed36_2</i> | LOC_Os05g08360 | Os_chr05    | 4559088                | [T/C] | REGULATORY            |
| <i>OsMed36_2</i> | LOC_Os05g08360 | Os_chr05    | 4558995                | [G/A] | REGULATORY            |
| <i>OsMed36_2</i> | LOC_Os05g08360 | Os_chr05    | 4558971                | [A/T] | REGULATORY            |
| <i>OsMed36_2</i> | LOC_Os05g08360 | Os_chr05    | 4558943                | [G/A] | REGULATORY            |
| <i>OsMed36_2</i> | LOC_Os05g08360 | Os_chr05    | 4558927                | [T/C] | REGULATORY            |
| <i>OsMed36_2</i> | LOC_Os05g08360 | Os_chr05    | 4558886                | [T/C] | REGULATORY            |
| <i>OsMed36_2</i> | LOC_Os05g08360 | Os_chr05    | 4558885                | [A/G] | REGULATORY            |
| <i>OsMed36_2</i> | LOC_Os05g08360 | Os_chr05    | 4558856                | [G/A] | REGULATORY            |
| <i>OsMed36_2</i> | LOC_Os05g08360 | Os_chr05    | 4558837                | [G/A] | REGULATORY            |
| <i>OsMed36_2</i> | LOC_Os05g08360 | Os_chr05    | 4558817                | [C/A] | REGULATORY            |
| <i>OsMed36_2</i> | LOC_Os05g08360 | Os_chr05    | 4558810                | [C/T] | REGULATORY            |
| <i>OsMed36_2</i> | LOC_Os05g08360 | Os_chr05    | 4558796                | [C/T] | REGULATORY            |
| <i>OsMed36_2</i> | LOC_Os05g08360 | Os_chr05    | 4558788                | [G/C] | REGULATORY            |
| <i>OsMed36_2</i> | LOC_Os05g08360 | Os_chr05    | 4558762                | [C/T] | REGULATORY            |
| <i>OsMed36_2</i> | LOC_Os05g08360 | Os_chr05    | 4558739                | [T/C] | REGULATORY            |
| <i>OsMed36_2</i> | LOC_Os05g08360 | Os_chr05    | 4558720                | [T/C] | REGULATORY            |
| <i>OsMed36_2</i> | LOC_Os05g08360 | Os_chr05    | 4558712                | [C/T] | REGULATORY            |
| <i>OsMed36_2</i> | LOC_Os05g08360 | Os_chr05    | 4558698                | [G/A] | REGULATORY            |
| <i>OsMed36_2</i> | LOC_Os05g08360 | Os_chr05    | 4558693                | [T/C] | REGULATORY            |
| <i>OsMed36_2</i> | LOC_Os05g08360 | Os_chr05    | 4558636                | [C/T] | REGULATORY            |
| <i>OsMed36_2</i> | LOC_Os05g08360 | Os_chr05    | 4558627                | [G/A] | REGULATORY            |
| <i>OsMed36_2</i> | LOC_Os05g08360 | Os_chr05    | 4558621                | [G/A] | REGULATORY            |
| <i>OsMed36_2</i> | LOC_Os05g08360 | Os_chr05    | 4558608                | [G/A] | REGULATORY            |

| Mediator genes   | MSU locus ID   | Chromosomes | Physical Position (bp) | SNPs  | Structural Annotation |
|------------------|----------------|-------------|------------------------|-------|-----------------------|
| <i>OsMed36_2</i> | LOC_Os05g08360 | Os_chr05    | 4558538                | [G/A] | REGULATORY            |
| <i>OsMed36_2</i> | LOC_Os05g08360 | Os_chr05    | 4558532                | [G/A] | REGULATORY            |
| <i>OsMed36_2</i> | LOC_Os05g08360 | Os_chr05    | 4558451                | [G/A] | REGULATORY            |
| <i>OsMed36_2</i> | LOC_Os05g08360 | Os_chr05    | 4558414                | [G/A] | REGULATORY            |
| <i>OsMed36_2</i> | LOC_Os05g08360 | Os_chr05    | 4558389                | [T/C] | REGULATORY            |
| <i>OsMed36_2</i> | LOC_Os05g08360 | Os_chr05    | 4558380                | [G/A] | REGULATORY            |
| <i>OsMed36_2</i> | LOC_Os05g08360 | Os_chr05    | 4558378                | [T/C] | REGULATORY            |
| <i>OsMed36_2</i> | LOC_Os05g08360 | Os_chr05    | 4558355                | [C/T] | REGULATORY            |
| <i>OsMed36_2</i> | LOC_Os05g08360 | Os_chr05    | 4558354                | [T/C] | REGULATORY            |
| <i>OsMed36_2</i> | LOC_Os05g08360 | Os_chr05    | 4558352                | [C/T] | REGULATORY            |
| <i>OsMed36_2</i> | LOC_Os05g08360 | Os_chr05    | 4558298                | [C/T] | REGULATORY            |
| <i>OsMed36_2</i> | LOC_Os05g08360 | Os_chr05    | 4560528                | [G/A] | SYNONYMOUS-CODING     |
| <i>OsMed36_2</i> | LOC_Os05g08360 | Os_chr05    | 4560312                | [T/G] | SYNONYMOUS-CODING     |
| <i>OsMed36_2</i> | LOC_Os05g08360 | Os_chr05    | 4560270                | [G/A] | SYNONYMOUS-CODING     |
| <i>OsMed36_2</i> | LOC_Os05g08360 | Os_chr05    | 4560074                | [C/T] | SYNONYMOUS-CODING     |
| <i>OsMed37_1</i> | LOC_Os01g62280 | Os_chr01    | 36038114               | [C/T] | INTRON                |
| <i>OsMed37_1</i> | LOC_Os01g62280 | Os_chr01    | 36038091               | [G/A] | INTRON                |
| <i>OsMed37_1</i> | LOC_Os01g62280 | Os_chr01    | 36038072               | [C/A] | INTRON                |
| <i>OsMed37_1</i> | LOC_Os01g62280 | Os_chr01    | 36038066               | [G/A] | INTRON                |
| <i>OsMed37_1</i> | LOC_Os01g62280 | Os_chr01    | 36038048               | [C/T] | INTRON                |
| <i>OsMed37_1</i> | LOC_Os01g62280 | Os_chr01    | 36038004               | [G/A] | INTRON                |
| <i>OsMed37_1</i> | LOC_Os01g62290 | Os_chr01    | 36039867               | [T/C] | INTRON                |
| <i>OsMed37_1</i> | LOC_Os01g62290 | Os_chr01    | 36039569               | [A/G] | INTRON                |
| <i>OsMed37_1</i> | LOC_Os01g62290 | Os_chr01    | 36039405               | [G/A] | INTRON                |
| <i>OsMed37_1</i> | LOC_Os01g62290 | Os_chr01    | 36039279               | [G/A] | INTRON                |
| <i>OsMed37_1</i> | LOC_Os01g62290 | Os_chr01    | 36039247               | [G/T] | INTRON                |
| <i>OsMed37_1</i> | LOC_Os01g62290 | Os_chr01    | 36039153               | [A/C] | INTRON                |
| <i>OsMed37_1</i> | LOC_Os01g62290 | Os_chr01    | 36039103               | [G/T] | INTRON                |
| <i>OsMed37_1</i> | LOC_Os01g62280 | Os_chr01    | 36037985               | [G/T] | NON-SYNONYMOUS-CODING |
| <i>OsMed37_1</i> | LOC_Os01g62280 | Os_chr01    | 36037862               | [G/A] | NON-SYNONYMOUS-CODING |
| <i>OsMed37_1</i> | LOC_Os01g62280 | Os_chr01    | 36037826               | [C/T] | NON-SYNONYMOUS-CODING |
| <i>OsMed37_1</i> | LOC_Os01g62290 | Os_chr01    | 36040723               | [A/T] | NON-SYNONYMOUS-CODING |
| <i>OsMed37_1</i> | LOC_Os01g62290 | Os_chr01    | 36038769               | [T/C] | REGULATORY            |
| <i>OsMed37_1</i> | LOC_Os01g62290 | Os_chr01    | 36038663               | [T/A] | REGULATORY            |
| <i>OsMed37_1</i> | LOC_Os01g62290 | Os_chr01    | 36042352               | [G/A] | REGULATORY            |
| <i>OsMed37_1</i> | LOC_Os01g62290 | Os_chr01    | 36042255               | [C/G] | REGULATORY            |
| <i>OsMed37_1</i> | LOC_Os01g62290 | Os_chr01    | 36042211               | [C/A] | REGULATORY            |
| <i>OsMed37_1</i> | LOC_Os01g62290 | Os_chr01    | 36042047               | [G/T] | REGULATORY            |
| <i>OsMed37_1</i> | LOC_Os01g62290 | Os_chr01    | 36041974               | [G/C] | REGULATORY            |
| <i>OsMed37_1</i> | LOC_Os01g62290 | Os_chr01    | 36038534               | [C/A] | REGULATORY            |
| <i>OsMed37_1</i> | LOC_Os01g62290 | Os_chr01    | 36038518               | [T/G] | REGULATORY            |
| <i>OsMed37_1</i> | LOC_Os01g62290 | Os_chr01    | 36038266               | [C/T] | REGULATORY            |
| <i>OsMed37_1</i> | LOC_Os01g62290 | Os_chr01    | 36038199               | [T/G] | REGULATORY            |
| <i>OsMed37_1</i> | LOC_Os01g62290 | Os_chr01    | 36037714               | [C/T] | REGULATORY            |
| <i>OsMed37_1</i> | LOC_Os01g62280 | Os_chr01    | 36037926               | [C/A] | SYNONYMOUS-CODING     |
| <i>OsMed37_1</i> | LOC_Os01g62290 | Os_chr01    | 36041837               | [C/T] | SYNONYMOUS-CODING     |
| <i>OsMed37_1</i> | LOC_Os01g62290 | Os_chr01    | 36041504               | [C/T] | SYNONYMOUS-CODING     |

| Mediator genes   | MSU locus ID   | Chromosomes | Physical Position (bp) | SNPs  | Structural Annotation |
|------------------|----------------|-------------|------------------------|-------|-----------------------|
| <i>OsMed37_1</i> | LOC_Os01g62290 | Os_chr01    | 36041477               | [C/T] | SYNONYMOUS-CODING     |
| <i>OsMed37_1</i> | LOC_Os01g62290 | Os_chr01    | 36041429               | [C/T] | SYNONYMOUS-CODING     |
| <i>OsMed37_1</i> | LOC_Os01g62290 | Os_chr01    | 36041276               | [A/G] | SYNONYMOUS-CODING     |
| <i>OsMed37_1</i> | LOC_Os01g62290 | Os_chr01    | 36041204               | [T/C] | SYNONYMOUS-CODING     |
| <i>OsMed37_1</i> | LOC_Os01g62290 | Os_chr01    | 36040286               | [C/T] | SYNONYMOUS-CODING     |
| <i>OsMed37_1</i> | LOC_Os01g62290 | Os_chr01    | 36040241               | [C/T] | SYNONYMOUS-CODING     |
| <i>OsMed37_2</i> | LOC_Os02g02410 | Os_chr02    | 842015                 | [G/T] | INTRON                |
| <i>OsMed37_2</i> | LOC_Os02g02410 | Os_chr02    | 841964                 | [T/A] | INTRON                |
| <i>OsMed37_2</i> | LOC_Os02g02410 | Os_chr02    | 841923                 | [A/G] | INTRON                |
| <i>OsMed37_2</i> | LOC_Os02g02410 | Os_chr02    | 841464                 | [C/T] | INTRON                |
| <i>OsMed37_2</i> | LOC_Os02g02410 | Os_chr02    | 841147                 | [G/T] | INTRON                |
| <i>OsMed37_2</i> | LOC_Os02g02410 | Os_chr02    | 840824                 | [A/G] | INTRON                |
| <i>OsMed37_2</i> | LOC_Os02g02410 | Os_chr02    | 840821                 | [T/C] | INTRON                |
| <i>OsMed37_2</i> | LOC_Os02g02410 | Os_chr02    | 840690                 | [G/A] | INTRON                |
| <i>OsMed37_2</i> | LOC_Os02g02410 | Os_chr02    | 840624                 | [G/A] | INTRON                |
| <i>OsMed37_2</i> | LOC_Os02g02410 | Os_chr02    | 840074                 | [G/A] | INTRON                |
| <i>OsMed37_2</i> | LOC_Os02g02410 | Os_chr02    | 840073                 | [C/T] | INTRON                |
| <i>OsMed37_2</i> | LOC_Os02g02410 | Os_chr02    | 839987                 | [G/A] | INTRON                |
| <i>OsMed37_2</i> | LOC_Os02g02410 | Os_chr02    | 839986                 | [C/T] | INTRON                |
| <i>OsMed37_2</i> | LOC_Os02g02410 | Os_chr02    | 839802                 | [C/G] | INTRON                |
| <i>OsMed37_2</i> | LOC_Os02g02410 | Os_chr02    | 839625                 | [G/T] | INTRON                |
| <i>OsMed37_2</i> | LOC_Os02g02410 | Os_chr02    | 842651                 | [T/C] | REGULATORY            |
| <i>OsMed37_2</i> | LOC_Os02g02410 | Os_chr02    | 842605                 | [G/T] | REGULATORY            |
| <i>OsMed37_2</i> | LOC_Os02g02410 | Os_chr02    | 842568                 | [T/A] | REGULATORY            |
| <i>OsMed37_2</i> | LOC_Os02g02410 | Os_chr02    | 838958                 | [T/C] | REGULATORY            |
| <i>OsMed37_2</i> | LOC_Os02g02410 | Os_chr02    | 838819                 | [G/C] | REGULATORY            |
| <i>OsMed37_2</i> | LOC_Os02g57590 | Os_chr02    | 843665                 | [G/A] | REGULATORY            |
| <i>OsMed37_2</i> | LOC_Os02g57590 | Os_chr02    | 843647                 | [G/A] | REGULATORY            |
| <i>OsMed37_2</i> | LOC_Os02g57590 | Os_chr02    | 843617                 | [G/A] | REGULATORY            |
| <i>OsMed37_2</i> | LOC_Os02g57590 | Os_chr02    | 843604                 | [G/T] | REGULATORY            |
| <i>OsMed37_2</i> | LOC_Os02g57590 | Os_chr02    | 843533                 | [C/T] | REGULATORY            |
| <i>OsMed37_2</i> | LOC_Os02g57590 | Os_chr02    | 843526                 | [C/T] | REGULATORY            |
| <i>OsMed37_2</i> | LOC_Os02g57590 | Os_chr02    | 843517                 | [C/T] | REGULATORY            |
| <i>OsMed37_2</i> | LOC_Os02g57590 | Os_chr02    | 843495                 | [A/G] | REGULATORY            |
| <i>OsMed37_2</i> | LOC_Os02g57590 | Os_chr02    | 843489                 | [C/A] | REGULATORY            |
| <i>OsMed37_2</i> | LOC_Os02g57590 | Os_chr02    | 843483                 | [G/T] | REGULATORY            |
| <i>OsMed37_2</i> | LOC_Os02g57590 | Os_chr02    | 843430                 | [C/T] | REGULATORY            |
| <i>OsMed37_2</i> | LOC_Os02g57590 | Os_chr02    | 843428                 | [G/A] | REGULATORY            |
| <i>OsMed37_2</i> | LOC_Os02g57590 | Os_chr02    | 843422                 | [G/A] | REGULATORY            |
| <i>OsMed37_2</i> | LOC_Os02g57590 | Os_chr02    | 843400                 | [G/A] | REGULATORY            |
| <i>OsMed37_2</i> | LOC_Os02g57590 | Os_chr02    | 843397                 | [C/T] | REGULATORY            |
| <i>OsMed37_2</i> | LOC_Os02g57590 | Os_chr02    | 843387                 | [T/G] | REGULATORY            |
| <i>OsMed37_2</i> | LOC_Os02g57590 | Os_chr02    | 843379                 | [C/A] | REGULATORY            |
| <i>OsMed37_2</i> | LOC_Os02g57590 | Os_chr02    | 843365                 | [G/C] | REGULATORY            |
| <i>OsMed37_2</i> | LOC_Os02g57590 | Os_chr02    | 843348                 | [C/T] | REGULATORY            |
| <i>OsMed37_2</i> | LOC_Os02g57590 | Os_chr02    | 843347                 | [G/A] | REGULATORY            |
| <i>OsMed37_2</i> | LOC_Os02g57590 | Os_chr02    | 843339                 | [G/A] | REGULATORY            |



| Mediator genes   | MSU locus ID   | Chromosomes | Physical Position (bp) | SNPs  | Structural Annotation |
|------------------|----------------|-------------|------------------------|-------|-----------------------|
| <i>OsMed37_2</i> | LOC_Os02g57590 | Os_chr02    | 843330                 | [G/A] | REGULATORY            |
| <i>OsMed37_2</i> | LOC_Os02g57590 | Os_chr02    | 843289                 | [G/A] | REGULATORY            |
| <i>OsMed37_2</i> | LOC_Os02g57590 | Os_chr02    | 843248                 | [G/A] | REGULATORY            |
| <i>OsMed37_2</i> | LOC_Os02g57590 | Os_chr02    | 843238                 | [C/T] | REGULATORY            |
| <i>OsMed37_2</i> | LOC_Os02g57590 | Os_chr02    | 843170                 | [T/A] | REGULATORY            |
| <i>OsMed37_2</i> | LOC_Os02g57590 | Os_chr02    | 843159                 | [A/T] | REGULATORY            |
| <i>OsMed37_2</i> | LOC_Os02g57590 | Os_chr02    | 843148                 | [T/A] | REGULATORY            |
| <i>OsMed37_2</i> | LOC_Os02g57590 | Os_chr02    | 843106                 | [G/A] | REGULATORY            |
| <i>OsMed37_2</i> | LOC_Os02g57590 | Os_chr02    | 843052                 | [G/T] | REGULATORY            |
| <i>OsMed37_2</i> | LOC_Os02g57590 | Os_chr02    | 843021                 | [G/A] | REGULATORY            |
| <i>OsMed37_2</i> | LOC_Os02g57590 | Os_chr02    | 843016                 | [A/T] | REGULATORY            |
| <i>OsMed37_2</i> | LOC_Os02g57590 | Os_chr02    | 843005                 | [T/C] | REGULATORY            |
| <i>OsMed37_2</i> | LOC_Os02g57590 | Os_chr02    | 842919                 | [G/A] | REGULATORY            |
| <i>OsMed37_2</i> | LOC_Os02g02410 | Os_chr02    | 842490                 | [G/A] | SYNONYMOUS-CODING     |
| <i>OsMed37_2</i> | LOC_Os02g02410 | Os_chr02    | 841731                 | [C/T] | SYNONYMOUS-CODING     |
| <i>OsMed37_2</i> | LOC_Os02g02410 | Os_chr02    | 841334                 | [C/T] | SYNONYMOUS-CODING     |
| <i>OsMed37_2</i> | LOC_Os02g02410 | Os_chr02    | 840991                 | [G/A] | SYNONYMOUS-CODING     |
| <i>OsMed37_2</i> | LOC_Os02g02410 | Os_chr02    | 840895                 | [C/A] | SYNONYMOUS-CODING     |
| <i>OsMed37_2</i> | LOC_Os02g02410 | Os_chr02    | 840472                 | [A/T] | SYNONYMOUS-CODING     |
| <i>OsMed37_2</i> | LOC_Os02g02410 | Os_chr02    | 840421                 | [G/A] | SYNONYMOUS-CODING     |
| <i>OsMed37_2</i> | LOC_Os02g02410 | Os_chr02    | 840250                 | [G/A] | SYNONYMOUS-CODING     |
| <i>OsMed37_2</i> | LOC_Os02g02410 | Os_chr02    | 840103                 | [A/G] | SYNONYMOUS-CODING     |
| <i>OsMed37_2</i> | LOC_Os02g02410 | Os_chr02    | 839661                 | [G/T] | SYNONYMOUS-CODING     |
| <i>OsMed37_2</i> | LOC_Os02g02410 | Os_chr02    | 839465                 | [C/T] | SYNONYMOUS-CODING     |
| <i>OsMed37_2</i> | LOC_Os02g02410 | Os_chr02    | 839096                 | [G/A] | SYNONYMOUS-CODING     |
| <i>OsMed37_3</i> | LOC_Os03g16860 | Os_chr03    | 9369665                | [A/G] | INTRON                |
| <i>OsMed37_3</i> | LOC_Os03g16860 | Os_chr03    | 9369489                | [A/T] | INTRON                |
| <i>OsMed37_3</i> | LOC_Os03g16860 | Os_chr03    | 9369204                | [A/G] | REGULATORY            |
| <i>OsMed37_3</i> | LOC_Os03g16860 | Os_chr03    | 9369147                | [C/G] | REGULATORY            |
| <i>OsMed37_3</i> | LOC_Os03g16860 | Os_chr03    | 9369146                | [C/A] | REGULATORY            |
| <i>OsMed37_3</i> | LOC_Os03g16860 | Os_chr03    | 9369145                | [T/G] | REGULATORY            |
| <i>OsMed37_3</i> | LOC_Os03g16860 | Os_chr03    | 9369123                | [T/C] | REGULATORY            |
| <i>OsMed37_3</i> | LOC_Os03g16860 | Os_chr03    | 9369122                | [A/C] | REGULATORY            |
| <i>OsMed37_3</i> | LOC_Os03g16860 | Os_chr03    | 9371937                | [T/A] | REGULATORY            |
| <i>OsMed37_3</i> | LOC_Os03g16860 | Os_chr03    | 9368882                | [C/T] | REGULATORY            |
| <i>OsMed37_3</i> | LOC_Os03g16860 | Os_chr03    | 9368706                | [T/C] | REGULATORY            |
| <i>OsMed37_3</i> | LOC_Os03g16860 | Os_chr03    | 9368648                | [A/G] | REGULATORY            |
| <i>OsMed37_3</i> | LOC_Os03g16860 | Os_chr03    | 9368619                | [C/T] | REGULATORY            |
| <i>OsMed37_3</i> | LOC_Os03g16860 | Os_chr03    | 9368599                | [C/T] | REGULATORY            |
| <i>OsMed37_3</i> | LOC_Os03g16860 | Os_chr03    | 9368595                | [A/G] | REGULATORY            |
| <i>OsMed37_3</i> | LOC_Os03g16860 | Os_chr03    | 9368535                | [T/C] | REGULATORY            |
| <i>OsMed37_3</i> | LOC_Os03g16860 | Os_chr03    | 9368425                | [A/T] | REGULATORY            |
| <i>OsMed37_3</i> | LOC_Os03g16860 | Os_chr03    | 9368399                | [A/G] | REGULATORY            |
| <i>OsMed37_3</i> | LOC_Os03g16860 | Os_chr03    | 9368381                | [C/T] | REGULATORY            |
| <i>OsMed37_3</i> | LOC_Os03g16860 | Os_chr03    | 9368337                | [G/A] | REGULATORY            |
| <i>OsMed37_3</i> | LOC_Os03g16860 | Os_chr03    | 9368305                | [T/C] | REGULATORY            |
| <i>OsMed37_3</i> | LOC_Os03g16860 | Os_chr03    | 9368293                | [G/A] | REGULATORY            |

| Mediator genes   | MSU locus ID   | Chromosomes | Physical Position (bp) | SNPs  | Structural Annotation |
|------------------|----------------|-------------|------------------------|-------|-----------------------|
| <i>OsMed37_3</i> | LOC_Os03g16860 | Os_chr03    | 9368163                | [C/A] | REGULATORY            |
| <i>OsMed37_3</i> | LOC_Os03g16860 | Os_chr03    | 9368146                | [T/C] | REGULATORY            |
| <i>OsMed37_3</i> | LOC_Os03g16860 | Os_chr03    | 9371773                | [C/T] | SYNONYMOUS-CODING     |
| <i>OsMed37_3</i> | LOC_Os03g16860 | Os_chr03    | 9371083                | [T/G] | SYNONYMOUS-CODING     |
| <i>OsMed37_3</i> | LOC_Os03g16860 | Os_chr03    | 9370828                | [G/A] | SYNONYMOUS-CODING     |
| <i>OsMed37_3</i> | LOC_Os03g16860 | Os_chr03    | 9370615                | [A/G] | SYNONYMOUS-CODING     |
| <i>OsMed37_3</i> | LOC_Os03g16860 | Os_chr03    | 9370408                | [C/G] | SYNONYMOUS-CODING     |
| <i>OsMed37_3</i> | LOC_Os03g16860 | Os_chr03    | 9370204                | [A/C] | SYNONYMOUS-CODING     |
| <i>OsMed37_4</i> | LOC_Os03g60620 | Os_chr03    | 34441521               | [A/G] | INTRON                |
| <i>OsMed37_4</i> | LOC_Os03g60620 | Os_chr03    | 34441505               | [A/G] | INTRON                |
| <i>OsMed37_4</i> | LOC_Os03g60620 | Os_chr03    | 34441453               | [G/C] | INTRON                |
| <i>OsMed37_4</i> | LOC_Os03g60620 | Os_chr03    | 34441451               | [G/A] | INTRON                |
| <i>OsMed37_4</i> | LOC_Os03g60620 | Os_chr03    | 34441422               | [G/A] | INTRON                |
| <i>OsMed37_4</i> | LOC_Os03g60620 | Os_chr03    | 34441421               | [C/T] | INTRON                |
| <i>OsMed37_4</i> | LOC_Os03g60620 | Os_chr03    | 34441417               | [C/T] | INTRON                |
| <i>OsMed37_4</i> | LOC_Os03g60620 | Os_chr03    | 34441268               | [G/A] | INTRON                |
| <i>OsMed37_4</i> | LOC_Os03g60620 | Os_chr03    | 34441138               | [G/T] | INTRON                |
| <i>OsMed37_4</i> | LOC_Os03g60620 | Os_chr03    | 34441112               | [A/G] | INTRON                |
| <i>OsMed37_4</i> | LOC_Os03g60620 | Os_chr03    | 34441070               | [G/T] | INTRON                |
| <i>OsMed37_4</i> | LOC_Os03g60620 | Os_chr03    | 34441043               | [A/G] | INTRON                |
| <i>OsMed37_4</i> | LOC_Os03g60620 | Os_chr03    | 34440881               | [C/T] | INTRON                |
| <i>OsMed37_4</i> | LOC_Os03g60620 | Os_chr03    | 34440873               | [T/C] | INTRON                |
| <i>OsMed37_4</i> | LOC_Os03g60620 | Os_chr03    | 34440869               | [G/A] | INTRON                |
| <i>OsMed37_4</i> | LOC_Os03g60620 | Os_chr03    | 34440855               | [G/A] | INTRON                |
| <i>OsMed37_4</i> | LOC_Os03g60620 | Os_chr03    | 34440778               | [G/C] | INTRON                |
| <i>OsMed37_4</i> | LOC_Os03g60620 | Os_chr03    | 34440765               | [A/C] | INTRON                |
| <i>OsMed37_4</i> | LOC_Os03g60620 | Os_chr03    | 34440652               | [G/T] | INTRON                |
| <i>OsMed37_4</i> | LOC_Os03g60620 | Os_chr03    | 34440613               | [C/A] | INTRON                |
| <i>OsMed37_4</i> | LOC_Os03g60620 | Os_chr03    | 34440548               | [G/T] | INTRON                |
| <i>OsMed37_4</i> | LOC_Os03g60620 | Os_chr03    | 34440544               | [A/T] | INTRON                |
| <i>OsMed37_4</i> | LOC_Os03g60620 | Os_chr03    | 34440523               | [G/T] | INTRON                |
| <i>OsMed37_4</i> | LOC_Os03g60620 | Os_chr03    | 34440422               | [T/C] | INTRON                |
| <i>OsMed37_4</i> | LOC_Os03g60620 | Os_chr03    | 34440392               | [G/A] | INTRON                |
| <i>OsMed37_4</i> | LOC_Os03g60620 | Os_chr03    | 34440313               | [A/T] | INTRON                |
| <i>OsMed37_4</i> | LOC_Os03g60620 | Os_chr03    | 34440162               | [T/A] | INTRON                |
| <i>OsMed37_4</i> | LOC_Os03g60620 | Os_chr03    | 34440124               | [C/T] | INTRON                |
| <i>OsMed37_4</i> | LOC_Os03g60620 | Os_chr03    | 34439900               | [C/A] | INTRON                |
| <i>OsMed37_4</i> | LOC_Os03g60620 | Os_chr03    | 34439894               | [T/C] | INTRON                |
| <i>OsMed37_4</i> | LOC_Os03g60620 | Os_chr03    | 34439814               | [T/C] | INTRON                |
| <i>OsMed37_4</i> | LOC_Os03g60620 | Os_chr03    | 34439805               | [G/C] | INTRON                |
| <i>OsMed37_4</i> | LOC_Os03g60620 | Os_chr03    | 34439784               | [G/A] | INTRON                |
| <i>OsMed37_4</i> | LOC_Os03g60620 | Os_chr03    | 34439764               | [C/T] | INTRON                |
| <i>OsMed37_4</i> | LOC_Os03g60620 | Os_chr03    | 34439710               | [A/G] | INTRON                |
| <i>OsMed37_4</i> | LOC_Os03g60620 | Os_chr03    | 34439696               | [G/A] | INTRON                |
| <i>OsMed37_4</i> | LOC_Os03g60620 | Os_chr03    | 34439688               | [C/T] | INTRON                |
| <i>OsMed37_4</i> | LOC_Os03g60620 | Os_chr03    | 34439678               | [T/G] | INTRON                |
| <i>OsMed37_4</i> | LOC_Os03g60620 | Os_chr03    | 34439673               | [A/G] | INTRON                |

| Mediator genes   | MSU locus ID   | Chromosomes | Physical Position (bp) | SNPs  | Structural Annotation |
|------------------|----------------|-------------|------------------------|-------|-----------------------|
| <i>OsMed37_4</i> | LOC_Os03g60620 | Os_chr03    | 34439593               | [T/C] | INTRON                |
| <i>OsMed37_4</i> | LOC_Os03g60620 | Os_chr03    | 34439590               | [T/C] | INTRON                |
| <i>OsMed37_4</i> | LOC_Os03g60620 | Os_chr03    | 34443099               | [C/G] | NON-SYNONYMOUS-CODING |
| <i>OsMed37_4</i> | LOC_Os03g60620 | Os_chr03    | 34439280               | [T/C] | REGULATORY            |
| <i>OsMed37_4</i> | LOC_Os03g60620 | Os_chr03    | 34439263               | [T/G] | REGULATORY            |
| <i>OsMed37_4</i> | LOC_Os03g60620 | Os_chr03    | 34443712               | [G/A] | REGULATORY            |
| <i>OsMed37_4</i> | LOC_Os03g60620 | Os_chr03    | 34443585               | [T/A] | REGULATORY            |
| <i>OsMed37_4</i> | LOC_Os03g60620 | Os_chr03    | 34443521               | [G/T] | REGULATORY            |
| <i>OsMed37_4</i> | LOC_Os03g60620 | Os_chr03    | 34443360               | [G/A] | REGULATORY            |
| <i>OsMed37_4</i> | LOC_Os03g60620 | Os_chr03    | 34439026               | [T/A] | REGULATORY            |
| <i>OsMed37_4</i> | LOC_Os03g60620 | Os_chr03    | 34438949               | [T/C] | REGULATORY            |
| <i>OsMed37_4</i> | LOC_Os03g60620 | Os_chr03    | 34438932               | [C/A] | REGULATORY            |
| <i>OsMed37_4</i> | LOC_Os03g60620 | Os_chr03    | 34438899               | [T/A] | REGULATORY            |
| <i>OsMed37_4</i> | LOC_Os03g60620 | Os_chr03    | 34438819               | [A/G] | REGULATORY            |
| <i>OsMed37_4</i> | LOC_Os03g60620 | Os_chr03    | 34438779               | [C/T] | REGULATORY            |
| <i>OsMed37_4</i> | LOC_Os03g60620 | Os_chr03    | 34438758               | [C/T] | REGULATORY            |
| <i>OsMed37_4</i> | LOC_Os03g60620 | Os_chr03    | 34438754               | [G/T] | REGULATORY            |
| <i>OsMed37_4</i> | LOC_Os03g60620 | Os_chr03    | 34438744               | [C/T] | REGULATORY            |
| <i>OsMed37_4</i> | LOC_Os03g60620 | Os_chr03    | 34438740               | [A/G] | REGULATORY            |
| <i>OsMed37_4</i> | LOC_Os03g60620 | Os_chr03    | 34438681               | [T/C] | REGULATORY            |
| <i>OsMed37_4</i> | LOC_Os03g60620 | Os_chr03    | 34438670               | [T/A] | REGULATORY            |
| <i>OsMed37_4</i> | LOC_Os03g60620 | Os_chr03    | 34438642               | [A/T] | REGULATORY            |
| <i>OsMed37_4</i> | LOC_Os03g60620 | Os_chr03    | 34438639               | [G/T] | REGULATORY            |
| <i>OsMed37_4</i> | LOC_Os03g60620 | Os_chr03    | 34438606               | [A/C] | REGULATORY            |
| <i>OsMed37_4</i> | LOC_Os03g60620 | Os_chr03    | 34438587               | [T/C] | REGULATORY            |
| <i>OsMed37_4</i> | LOC_Os03g60620 | Os_chr03    | 34438574               | [C/T] | REGULATORY            |
| <i>OsMed37_4</i> | LOC_Os03g60620 | Os_chr03    | 34438570               | [A/G] | REGULATORY            |
| <i>OsMed37_4</i> | LOC_Os03g60620 | Os_chr03    | 34438552               | [C/A] | REGULATORY            |
| <i>OsMed37_4</i> | LOC_Os03g60620 | Os_chr03    | 34438465               | [A/G] | REGULATORY            |
| <i>OsMed37_4</i> | LOC_Os03g60620 | Os_chr03    | 34438445               | [C/A] | REGULATORY            |
| <i>OsMed37_4</i> | LOC_Os03g60620 | Os_chr03    | 34438383               | [C/T] | REGULATORY            |
| <i>OsMed37_4</i> | LOC_Os03g60620 | Os_chr03    | 34438366               | [A/G] | REGULATORY            |
| <i>OsMed37_4</i> | LOC_Os03g60620 | Os_chr03    | 34438276               | [C/T] | REGULATORY            |
| <i>OsMed37_4</i> | LOC_Os03g60620 | Os_chr03    | 34438263               | [T/C] | REGULATORY            |
| <i>OsMed37_4</i> | LOC_Os03g60620 | Os_chr03    | 34438254               | [C/T] | REGULATORY            |
| <i>OsMed37_4</i> | LOC_Os03g60620 | Os_chr03    | 34438242               | [G/A] | REGULATORY            |
| <i>OsMed37_4</i> | LOC_Os03g60620 | Os_chr03    | 34438238               | [C/T] | REGULATORY            |
| <i>OsMed37_4</i> | LOC_Os03g60620 | Os_chr03    | 34438224               | [A/G] | REGULATORY            |
| <i>OsMed37_4</i> | LOC_Os03g60620 | Os_chr03    | 34438214               | [G/A] | REGULATORY            |
| <i>OsMed37_4</i> | LOC_Os03g60620 | Os_chr03    | 34438211               | [C/T] | REGULATORY            |
| <i>OsMed37_4</i> | LOC_Os03g60620 | Os_chr03    | 34438202               | [T/C] | REGULATORY            |
| <i>OsMed37_4</i> | LOC_Os03g60620 | Os_chr03    | 34443318               | [T/C] | SYNONYMOUS-CODING     |
| <i>OsMed37_4</i> | LOC_Os03g60620 | Os_chr03    | 34443273               | [C/T] | SYNONYMOUS-CODING     |
| <i>OsMed37_4</i> | LOC_Os03g60620 | Os_chr03    | 34443222               | [T/C] | SYNONYMOUS-CODING     |
| <i>OsMed37_4</i> | LOC_Os03g60620 | Os_chr03    | 34443165               | [C/T] | SYNONYMOUS-CODING     |
| <i>OsMed37_4</i> | LOC_Os03g60620 | Os_chr03    | 34443123               | [G/T] | SYNONYMOUS-CODING     |
| <i>OsMed37_4</i> | LOC_Os03g60620 | Os_chr03    | 34442886               | [A/C] | SYNONYMOUS-CODING     |

| Mediator genes   | MSU locus ID   | Chromosomes | Physical Position (bp) | SNPs  | Structural Annotation |
|------------------|----------------|-------------|------------------------|-------|-----------------------|
| <i>OsMed37_4</i> | LOC_Os03g60620 | Os_chr03    | 34442847               | [T/C] | SYNONYMOUS-CODING     |
| <i>OsMed37_4</i> | LOC_Os03g60620 | Os_chr03    | 34442469               | [T/C] | SYNONYMOUS-CODING     |
| <i>OsMed37_4</i> | LOC_Os03g60620 | Os_chr03    | 34442460               | [T/C] | SYNONYMOUS-CODING     |
| <i>OsMed37_4</i> | LOC_Os03g60620 | Os_chr03    | 34442436               | [T/C] | SYNONYMOUS-CODING     |
| <i>OsMed37_4</i> | LOC_Os03g60620 | Os_chr03    | 34442292               | [C/T] | SYNONYMOUS-CODING     |
| <i>OsMed37_4</i> | LOC_Os03g60620 | Os_chr03    | 34442166               | [C/T] | SYNONYMOUS-CODING     |
| <i>OsMed37_4</i> | LOC_Os03g60620 | Os_chr03    | 34442037               | [C/A] | SYNONYMOUS-CODING     |
| <i>OsMed37_4</i> | LOC_Os03g60620 | Os_chr03    | 34441881               | [A/C] | SYNONYMOUS-CODING     |
| <i>OsMed37_4</i> | LOC_Os03g60620 | Os_chr03    | 34441842               | [A/T] | SYNONYMOUS-CODING     |
| <i>OsMed37_4</i> | LOC_Os03g60620 | Os_chr03    | 34441806               | [G/A] | SYNONYMOUS-CODING     |
| <i>OsMed37_4</i> | LOC_Os03g60620 | Os_chr03    | 34441650               | [C/T] | SYNONYMOUS-CODING     |
| <i>OsMed37_4</i> | LOC_Os03g60620 | Os_chr03    | 34441617               | [T/C] | SYNONYMOUS-CODING     |
| <i>OsMed37_4</i> | LOC_Os03g60620 | Os_chr03    | 34439451               | [C/G] | SYNONYMOUS-CODING     |
| <i>OsMed37_4</i> | LOC_Os03g60620 | Os_chr03    | 34439391               | [G/C] | SYNONYMOUS-CODING     |
| <i>OsMed37_5</i> | LOC_Os05g35400 | Os_chr05    | 20973353               | [C/G] | NON-SYNONYMOUS-CODING |
| <i>OsMed37_5</i> | LOC_Os05g35400 | Os_chr05    | 20972744               | [C/T] | NON-SYNONYMOUS-CODING |
| <i>OsMed37_5</i> | LOC_Os05g35400 | Os_chr05    | 20971988               | [G/A] | REGULATORY            |
| <i>OsMed37_5</i> | LOC_Os05g35400 | Os_chr05    | 20974460               | [G/T] | REGULATORY            |
| <i>OsMed37_5</i> | LOC_Os05g35400 | Os_chr05    | 20974347               | [A/G] | REGULATORY            |
| <i>OsMed37_5</i> | LOC_Os05g35400 | Os_chr05    | 20974262               | [C/T] | REGULATORY            |
| <i>OsMed37_5</i> | LOC_Os05g35400 | Os_chr05    | 20974185               | [C/A] | REGULATORY            |
| <i>OsMed37_5</i> | LOC_Os05g35400 | Os_chr05    | 20974174               | [A/T] | REGULATORY            |
| <i>OsMed37_5</i> | LOC_Os05g35400 | Os_chr05    | 20974149               | [C/T] | REGULATORY            |
| <i>OsMed37_5</i> | LOC_Os05g35400 | Os_chr05    | 20974143               | [T/C] | REGULATORY            |
| <i>OsMed37_5</i> | LOC_Os05g35400 | Os_chr05    | 20974090               | [C/T] | REGULATORY            |
| <i>OsMed37_5</i> | LOC_Os05g35400 | Os_chr05    | 20974083               | [A/G] | REGULATORY            |
| <i>OsMed37_5</i> | LOC_Os05g35400 | Os_chr05    | 20974076               | [G/A] | REGULATORY            |
| <i>OsMed37_5</i> | LOC_Os05g35400 | Os_chr05    | 20974054               | [T/C] | REGULATORY            |
| <i>OsMed37_5</i> | LOC_Os05g35400 | Os_chr05    | 20974028               | [T/C] | REGULATORY            |
| <i>OsMed37_5</i> | LOC_Os05g35400 | Os_chr05    | 20974007               | [T/C] | REGULATORY            |
| <i>OsMed37_5</i> | LOC_Os05g35400 | Os_chr05    | 20973991               | [C/T] | REGULATORY            |
| <i>OsMed37_5</i> | LOC_Os05g35400 | Os_chr05    | 20973977               | [G/T] | REGULATORY            |
| <i>OsMed37_5</i> | LOC_Os05g35400 | Os_chr05    | 20973963               | [C/T] | REGULATORY            |
| <i>OsMed37_5</i> | LOC_Os05g35400 | Os_chr05    | 20973958               | [G/C] | REGULATORY            |
| <i>OsMed37_5</i> | LOC_Os05g35400 | Os_chr05    | 20973944               | [C/A] | REGULATORY            |
| <i>OsMed37_5</i> | LOC_Os05g35400 | Os_chr05    | 20973903               | [A/G] | REGULATORY            |
| <i>OsMed37_5</i> | LOC_Os05g35400 | Os_chr05    | 20973717               | [C/A] | REGULATORY            |
| <i>OsMed37_5</i> | LOC_Os05g35400 | Os_chr05    | 20973692               | [T/G] | REGULATORY            |
| <i>OsMed37_5</i> | LOC_Os05g35400 | Os_chr05    | 20973597               | [C/A] | REGULATORY            |
| <i>OsMed37_5</i> | LOC_Os05g35400 | Os_chr05    | 20973565               | [G/A] | REGULATORY            |
| <i>OsMed37_5</i> | LOC_Os05g35400 | Os_chr05    | 20973535               | [C/T] | REGULATORY            |
| <i>OsMed37_5</i> | LOC_Os05g35400 | Os_chr05    | 20973426               | [C/A] | SYNONYMOUS-CODING     |
| <i>OsMed37_5</i> | LOC_Os05g35400 | Os_chr05    | 20973285               | [G/A] | SYNONYMOUS-CODING     |
| <i>OsMed37_5</i> | LOC_Os05g35400 | Os_chr05    | 20972535               | [G/A] | SYNONYMOUS-CODING     |
| <i>OsMed37_5</i> | LOC_Os05g35400 | Os_chr05    | 20972169               | [G/T] | SYNONYMOUS-CODING     |
| <i>OsMed37_5</i> | LOC_Os05g35400 | Os_chr05    | 20971851               | [C/G] | SYNONYMOUS-CODING     |
| <i>OsMed37_5</i> | LOC_Os05g35400 | Os_chr05    | 20971803               | [G/C] | SYNONYMOUS-CODING     |

| Mediator genes   | MSU locus ID   | Chromosomes | Physical Position (bp) | SNPs  | Structural Annotation |
|------------------|----------------|-------------|------------------------|-------|-----------------------|
| <i>OsMed37_5</i> | LOC_Os05g35400 | Os_chr05    | 20971536               | [A/G] | SYNONYMOUS-CODING     |
| <i>OsMed37_6</i> | LOC_Os05g38530 | Os_chr05    | 22539630               | [G/T] | INTRON                |
| <i>OsMed37_6</i> | LOC_Os05g38530 | Os_chr05    | 22539484               | [C/T] | INTRON                |
| <i>OsMed37_6</i> | LOC_Os05g38530 | Os_chr05    | 22539174               | [A/T] | INTRON                |
| <i>OsMed37_6</i> | LOC_Os05g38530 | Os_chr05    | 22539141               | [C/T] | INTRON                |
| <i>OsMed37_6</i> | LOC_Os05g38530 | Os_chr05    | 22539046               | [T/C] | INTRON                |
| <i>OsMed37_6</i> | LOC_Os05g38530 | Os_chr05    | 22538986               | [C/T] | INTRON                |
| <i>OsMed37_6</i> | LOC_Os05g38530 | Os_chr05    | 22539863               | [C/A] | NON-SYNONYMOUS-CODING |
| <i>OsMed37_6</i> | LOC_Os05g38530 | Os_chr05    | 22537346               | [C/T] | NON-SYNONYMOUS-CODING |
| <i>OsMed37_6</i> | LOC_Os05g38530 | Os_chr05    | 22539980               | [T/A] | REGULATORY            |
| <i>OsMed37_6</i> | LOC_Os05g38530 | Os_chr05    | 22539883               | [C/T] | REGULATORY            |
| <i>OsMed37_6</i> | LOC_Os05g38530 | Os_chr05    | 22539878               | [C/T] | REGULATORY            |
| <i>OsMed37_6</i> | LOC_Os05g38530 | Os_chr05    | 22537029               | [T/C] | REGULATORY            |
| <i>OsMed37_6</i> | LOC_Os05g38530 | Os_chr05    | 22537016               | [C/T] | REGULATORY            |
| <i>OsMed37_6</i> | LOC_Os05g38530 | Os_chr05    | 22541021               | [C/A] | REGULATORY            |
| <i>OsMed37_6</i> | LOC_Os05g38530 | Os_chr05    | 22541002               | [G/A] | REGULATORY            |
| <i>OsMed37_6</i> | LOC_Os05g38530 | Os_chr05    | 22540980               | [G/A] | REGULATORY            |
| <i>OsMed37_6</i> | LOC_Os05g38530 | Os_chr05    | 22540976               | [G/T] | REGULATORY            |
| <i>OsMed37_6</i> | LOC_Os05g38530 | Os_chr05    | 22540966               | [T/C] | REGULATORY            |
| <i>OsMed37_6</i> | LOC_Os05g38530 | Os_chr05    | 22540955               | [C/T] | REGULATORY            |
| <i>OsMed37_6</i> | LOC_Os05g38530 | Os_chr05    | 22540937               | [C/T] | REGULATORY            |
| <i>OsMed37_6</i> | LOC_Os05g38530 | Os_chr05    | 22540932               | [G/A] | REGULATORY            |
| <i>OsMed37_6</i> | LOC_Os05g38530 | Os_chr05    | 22540910               | [A/G] | REGULATORY            |
| <i>OsMed37_6</i> | LOC_Os05g38530 | Os_chr05    | 22540873               | [C/T] | REGULATORY            |
| <i>OsMed37_6</i> | LOC_Os05g38530 | Os_chr05    | 22540818               | [T/G] | REGULATORY            |
| <i>OsMed37_6</i> | LOC_Os05g38530 | Os_chr05    | 22540802               | [T/C] | REGULATORY            |
| <i>OsMed37_6</i> | LOC_Os05g38530 | Os_chr05    | 22540779               | [G/A] | REGULATORY            |
| <i>OsMed37_6</i> | LOC_Os05g38530 | Os_chr05    | 22540765               | [G/C] | REGULATORY            |
| <i>OsMed37_6</i> | LOC_Os05g38530 | Os_chr05    | 22540726               | [A/G] | REGULATORY            |
| <i>OsMed37_6</i> | LOC_Os05g38530 | Os_chr05    | 22540724               | [G/A] | REGULATORY            |
| <i>OsMed37_6</i> | LOC_Os05g38530 | Os_chr05    | 22540698               | [T/A] | REGULATORY            |
| <i>OsMed37_6</i> | LOC_Os05g38530 | Os_chr05    | 22540691               | [C/T] | REGULATORY            |
| <i>OsMed37_6</i> | LOC_Os05g38530 | Os_chr05    | 22540659               | [A/C] | REGULATORY            |
| <i>OsMed37_6</i> | LOC_Os05g38530 | Os_chr05    | 22540567               | [G/T] | REGULATORY            |
| <i>OsMed37_6</i> | LOC_Os05g38530 | Os_chr05    | 22540565               | [C/A] | REGULATORY            |
| <i>OsMed37_6</i> | LOC_Os05g38530 | Os_chr05    | 22540559               | [T/C] | REGULATORY            |
| <i>OsMed37_6</i> | LOC_Os05g38530 | Os_chr05    | 22540555               | [T/C] | REGULATORY            |
| <i>OsMed37_6</i> | LOC_Os05g38530 | Os_chr05    | 22540533               | [G/A] | REGULATORY            |
| <i>OsMed37_6</i> | LOC_Os05g38530 | Os_chr05    | 22540502               | [G/T] | REGULATORY            |
| <i>OsMed37_6</i> | LOC_Os05g38530 | Os_chr05    | 22540501               | [G/A] | REGULATORY            |
| <i>OsMed37_6</i> | LOC_Os05g38530 | Os_chr05    | 22540482               | [T/C] | REGULATORY            |
| <i>OsMed37_6</i> | LOC_Os05g38530 | Os_chr05    | 22540471               | [C/A] | REGULATORY            |
| <i>OsMed37_6</i> | LOC_Os05g38530 | Os_chr05    | 22540470               | [T/C] | REGULATORY            |
| <i>OsMed37_6</i> | LOC_Os05g38530 | Os_chr05    | 22540460               | [C/T] | REGULATORY            |
| <i>OsMed37_6</i> | LOC_Os05g38530 | Os_chr05    | 22540445               | [G/A] | REGULATORY            |
| <i>OsMed37_6</i> | LOC_Os05g38530 | Os_chr05    | 22540432               | [A/G] | REGULATORY            |
| <i>OsMed37_6</i> | LOC_Os05g38530 | Os_chr05    | 22540418               | [C/T] | REGULATORY            |

| Mediator genes   | MSU locus ID   | Chromosomes | Physical Position (bp) | SNPs  | Structural Annotation |
|------------------|----------------|-------------|------------------------|-------|-----------------------|
| <i>OsMed37_6</i> | LOC_Os05g38530 | Os_chr05    | 22540403               | [C/T] | REGULATORY            |
| <i>OsMed37_6</i> | LOC_Os05g38530 | Os_chr05    | 22540368               | [A/G] | REGULATORY            |
| <i>OsMed37_6</i> | LOC_Os05g38530 | Os_chr05    | 22540070               | [G/T] | REGULATORY            |
| <i>OsMed37_6</i> | LOC_Os05g38530 | Os_chr05    | 22540043               | [T/G] | REGULATORY            |
| <i>OsMed37_6</i> | LOC_Os05g38530 | Os_chr05    | 22538434               | [G/A] | SYNONYMOUS-CODING     |
| <i>OsMed37_6</i> | LOC_Os05g38530 | Os_chr05    | 22538008               | [C/T] | SYNONYMOUS-CODING     |
| <i>OsMed37_6</i> | LOC_Os05g38530 | Os_chr05    | 22537276               | [G/A] | SYNONYMOUS-CODING     |
| <i>OsMed37_7</i> | LOC_Os08g09770 | Os_chr08    | 5646727                | [G/A] | NON-SYNONYMOUS-CODING |
| <i>OsMed37_7</i> | LOC_Os08g09770 | Os_chr08    | 5646705                | [G/A] | NON-SYNONYMOUS-CODING |
| <i>OsMed37_7</i> | LOC_Os08g09770 | Os_chr08    | 5646329                | [G/T] | NON-SYNONYMOUS-CODING |
| <i>OsMed37_7</i> | LOC_Os08g09770 | Os_chr08    | 5645904                | [G/C] | NON-SYNONYMOUS-CODING |
| <i>OsMed37_7</i> | LOC_Os08g09770 | Os_chr08    | 5645824                | [C/T] | NON-SYNONYMOUS-CODING |
| <i>OsMed37_7</i> | LOC_Os08g09770 | Os_chr08    | 5645795                | [C/G] | NON-SYNONYMOUS-CODING |
| <i>OsMed37_7</i> | LOC_Os08g09770 | Os_chr08    | 5645701                | [G/C] | NON-SYNONYMOUS-CODING |
| <i>OsMed37_7</i> | LOC_Os08g09770 | Os_chr08    | 5645470                | [C/T] | NON-SYNONYMOUS-CODING |
| <i>OsMed37_7</i> | LOC_Os08g09770 | Os_chr08    | 5645443                | [C/T] | NON-SYNONYMOUS-CODING |
| <i>OsMed37_7</i> | LOC_Os08g09770 | Os_chr08    | 5645430                | [G/A] | NON-SYNONYMOUS-CODING |
| <i>OsMed37_7</i> | LOC_Os08g09770 | Os_chr08    | 5645394                | [A/G] | NON-SYNONYMOUS-CODING |
| <i>OsMed37_7</i> | LOC_Os08g09770 | Os_chr08    | 5645093                | [C/G] | NON-SYNONYMOUS-CODING |
| <i>OsMed37_7</i> | LOC_Os08g09770 | Os_chr08    | 5645072                | [C/A] | NON-SYNONYMOUS-CODING |
| <i>OsMed37_7</i> | LOC_Os08g09770 | Os_chr08    | 5645052                | [C/T] | NON-SYNONYMOUS-CODING |
| <i>OsMed37_7</i> | LOC_Os08g09770 | Os_chr08    | 5644959                | [G/T] | NON-SYNONYMOUS-CODING |
| <i>OsMed37_7</i> | LOC_Os08g09770 | Os_chr08    | 5644877                | [C/G] | NON-SYNONYMOUS-CODING |
| <i>OsMed37_7</i> | LOC_Os08g09770 | Os_chr08    | 5644825                | [C/T] | NON-SYNONYMOUS-CODING |
| <i>OsMed37_7</i> | LOC_Os08g09770 | Os_chr08    | 5644719                | [T/C] | REGULATORY            |
| <i>OsMed37_7</i> | LOC_Os08g09770 | Os_chr08    | 5644717                | [T/A] | REGULATORY            |
| <i>OsMed37_7</i> | LOC_Os08g09770 | Os_chr08    | 5644712                | [C/A] | REGULATORY            |
| <i>OsMed37_7</i> | LOC_Os08g09770 | Os_chr08    | 5644681                | [G/A] | REGULATORY            |
| <i>OsMed37_7</i> | LOC_Os08g09770 | Os_chr08    | 5647794                | [T/A] | REGULATORY            |
| <i>OsMed37_7</i> | LOC_Os08g09770 | Os_chr08    | 5647772                | [T/C] | REGULATORY            |
| <i>OsMed37_7</i> | LOC_Os08g09770 | Os_chr08    | 5647750                | [A/C] | REGULATORY            |
| <i>OsMed37_7</i> | LOC_Os08g09770 | Os_chr08    | 5647663                | [T/C] | REGULATORY            |
| <i>OsMed37_7</i> | LOC_Os08g09770 | Os_chr08    | 5647642                | [C/T] | REGULATORY            |
| <i>OsMed37_7</i> | LOC_Os08g09770 | Os_chr08    | 5647637                | [C/A] | REGULATORY            |
| <i>OsMed37_7</i> | LOC_Os08g09770 | Os_chr08    | 5647606                | [T/A] | REGULATORY            |
| <i>OsMed37_7</i> | LOC_Os08g09770 | Os_chr08    | 5647537                | [C/A] | REGULATORY            |
| <i>OsMed37_7</i> | LOC_Os08g09770 | Os_chr08    | 5647515                | [C/T] | REGULATORY            |
| <i>OsMed37_7</i> | LOC_Os08g09770 | Os_chr08    | 5647514                | [C/T] | REGULATORY            |
| <i>OsMed37_7</i> | LOC_Os08g09770 | Os_chr08    | 5647458                | [T/C] | REGULATORY            |
| <i>OsMed37_7</i> | LOC_Os08g09770 | Os_chr08    | 5647457                | [G/A] | REGULATORY            |
| <i>OsMed37_7</i> | LOC_Os08g09770 | Os_chr08    | 5647452                | [T/C] | REGULATORY            |
| <i>OsMed37_7</i> | LOC_Os08g09770 | Os_chr08    | 5647450                | [C/T] | REGULATORY            |
| <i>OsMed37_7</i> | LOC_Os08g09770 | Os_chr08    | 5647413                | [G/A] | REGULATORY            |
| <i>OsMed37_7</i> | LOC_Os08g09770 | Os_chr08    | 5647374                | [C/T] | REGULATORY            |
| <i>OsMed37_7</i> | LOC_Os08g09770 | Os_chr08    | 5647367                | [T/G] | REGULATORY            |
| <i>OsMed37_7</i> | LOC_Os08g09770 | Os_chr08    | 5647358                | [C/T] | REGULATORY            |
| <i>OsMed37_7</i> | LOC_Os08g09770 | Os_chr08    | 5647355                | [C/T] | REGULATORY            |

| Mediator genes   | MSU locus ID   | Chromosomes | Physical Position (bp) | SNPs  | Structural Annotation |
|------------------|----------------|-------------|------------------------|-------|-----------------------|
| <i>OsMed37_7</i> | LOC_Os08g09770 | Os_chr08    | 5647343                | [T/A] | REGULATORY            |
| <i>OsMed37_7</i> | LOC_Os08g09770 | Os_chr08    | 5647325                | [C/T] | REGULATORY            |
| <i>OsMed37_7</i> | LOC_Os08g09770 | Os_chr08    | 5647302                | [C/A] | REGULATORY            |
| <i>OsMed37_7</i> | LOC_Os08g09770 | Os_chr08    | 5647253                | [C/T] | REGULATORY            |
| <i>OsMed37_7</i> | LOC_Os08g09770 | Os_chr08    | 5647229                | [G/A] | REGULATORY            |
| <i>OsMed37_7</i> | LOC_Os08g09770 | Os_chr08    | 5647219                | [A/G] | REGULATORY            |
| <i>OsMed37_7</i> | LOC_Os08g09770 | Os_chr08    | 5647215                | [T/A] | REGULATORY            |
| <i>OsMed37_7</i> | LOC_Os08g09770 | Os_chr08    | 5647213                | [G/A] | REGULATORY            |
| <i>OsMed37_7</i> | LOC_Os08g09770 | Os_chr08    | 5647207                | [T/C] | REGULATORY            |
| <i>OsMed37_7</i> | LOC_Os08g09770 | Os_chr08    | 5647200                | [G/A] | REGULATORY            |
| <i>OsMed37_7</i> | LOC_Os08g09770 | Os_chr08    | 5647196                | [G/A] | REGULATORY            |
| <i>OsMed37_7</i> | LOC_Os08g09770 | Os_chr08    | 5647195                | [T/A] | REGULATORY            |
| <i>OsMed37_7</i> | LOC_Os08g09770 | Os_chr08    | 5647175                | [G/A] | REGULATORY            |
| <i>OsMed37_7</i> | LOC_Os08g09770 | Os_chr08    | 5647157                | [C/T] | REGULATORY            |
| <i>OsMed37_7</i> | LOC_Os08g09770 | Os_chr08    | 5647131                | [A/G] | REGULATORY            |
| <i>OsMed37_7</i> | LOC_Os08g09770 | Os_chr08    | 5647129                | [T/C] | REGULATORY            |
| <i>OsMed37_7</i> | LOC_Os08g09770 | Os_chr08    | 5647077                | [T/C] | REGULATORY            |
| <i>OsMed37_7</i> | LOC_Os08g09770 | Os_chr08    | 5647055                | [G/T] | REGULATORY            |
| <i>OsMed37_7</i> | LOC_Os08g09770 | Os_chr08    | 5646993                | [A/G] | REGULATORY            |
| <i>OsMed37_7</i> | LOC_Os08g09770 | Os_chr08    | 5646918                | [G/A] | REGULATORY            |
| <i>OsMed37_7</i> | LOC_Os08g09770 | Os_chr08    | 5646906                | [A/C] | REGULATORY            |
| <i>OsMed37_7</i> | LOC_Os08g09770 | Os_chr08    | 5646884                | [G/A] | REGULATORY            |
| <i>OsMed37_7</i> | LOC_Os08g09770 | Os_chr08    | 5646581                | [G/A] | SYNONYMOUS-CODING     |
| <i>OsMed37_7</i> | LOC_Os08g09770 | Os_chr08    | 5646518                | [A/G] | SYNONYMOUS-CODING     |
| <i>OsMed37_7</i> | LOC_Os08g09770 | Os_chr08    | 5646251                | [G/C] | SYNONYMOUS-CODING     |
| <i>OsMed37_7</i> | LOC_Os08g09770 | Os_chr08    | 5646128                | [G/A] | SYNONYMOUS-CODING     |
| <i>OsMed37_7</i> | LOC_Os08g09770 | Os_chr08    | 5645900                | [G/A] | SYNONYMOUS-CODING     |
| <i>OsMed37_7</i> | LOC_Os08g09770 | Os_chr08    | 5645879                | [G/A] | SYNONYMOUS-CODING     |
| <i>OsMed37_7</i> | LOC_Os08g09770 | Os_chr08    | 5645783                | [G/A] | SYNONYMOUS-CODING     |
| <i>OsMed37_7</i> | LOC_Os08g09770 | Os_chr08    | 5645771                | [C/T] | SYNONYMOUS-CODING     |
| <i>OsMed37_7</i> | LOC_Os08g09770 | Os_chr08    | 5645702                | [G/A] | SYNONYMOUS-CODING     |
| <i>OsMed37_7</i> | LOC_Os08g09770 | Os_chr08    | 5645552                | [G/T] | SYNONYMOUS-CODING     |
| <i>OsMed37_7</i> | LOC_Os08g09770 | Os_chr08    | 5645366                | [C/T] | SYNONYMOUS-CODING     |
| <i>OsMed37_7</i> | LOC_Os08g09770 | Os_chr08    | 5645060                | [G/C] | SYNONYMOUS-CODING     |
| <i>OsMed37_7</i> | LOC_Os08g09770 | Os_chr08    | 5645012                | [G/C] | SYNONYMOUS-CODING     |
| <i>OsMed37_7</i> | LOC_Os08g09770 | Os_chr08    | 5644891                | [G/A] | SYNONYMOUS-CODING     |
| <i>OsMed37_8</i> | LOC_Os11g47760 | Os_chr11    | 28283202               | [C/G] | INTRON                |
| <i>OsMed37_8</i> | LOC_Os11g47760 | Os_chr11    | 28283196               | [A/T] | INTRON                |
| <i>OsMed37_8</i> | LOC_Os11g47760 | Os_chr11    | 28283106               | [A/G] | INTRON                |
| <i>OsMed37_8</i> | LOC_Os11g47760 | Os_chr11    | 28283090               | [G/A] | INTRON                |
| <i>OsMed37_8</i> | LOC_Os11g47760 | Os_chr11    | 28282999               | [C/T] | INTRON                |
| <i>OsMed37_8</i> | LOC_Os11g47760 | Os_chr11    | 28282981               | [T/G] | INTRON                |
| <i>OsMed37_8</i> | LOC_Os11g47760 | Os_chr11    | 28282979               | [G/T] | INTRON                |
| <i>OsMed37_8</i> | LOC_Os11g47760 | Os_chr11    | 28282939               | [C/T] | INTRON                |
| <i>OsMed37_8</i> | LOC_Os11g47760 | Os_chr11    | 28282922               | [C/A] | INTRON                |
| <i>OsMed37_8</i> | LOC_Os11g47760 | Os_chr11    | 28282831               | [C/T] | INTRON                |
| <i>OsMed37_8</i> | LOC_Os11g47760 | Os_chr11    | 28282785               | [T/G] | INTRON                |

| Mediator genes   | MSU locus ID   | Chromosomes | Physical Position (bp) | SNPs  | Structural Annotation |
|------------------|----------------|-------------|------------------------|-------|-----------------------|
| <i>OsMed37_8</i> | LOC_Os11g47760 | Os_chr11    | 28282783               | [C/G] | INTRON                |
| <i>OsMed37_8</i> | LOC_Os11g47760 | Os_chr11    | 28282748               | [T/C] | INTRON                |
| <i>OsMed37_8</i> | LOC_Os11g47760 | Os_chr11    | 28282710               | [T/A] | INTRON                |
| <i>OsMed37_8</i> | LOC_Os11g47760 | Os_chr11    | 28282640               | [C/A] | INTRON                |
| <i>OsMed37_8</i> | LOC_Os11g47760 | Os_chr11    | 28282602               | [G/C] | INTRON                |
| <i>OsMed37_8</i> | LOC_Os11g47760 | Os_chr11    | 28282601               | [T/G] | INTRON                |
| <i>OsMed37_8</i> | LOC_Os11g47760 | Os_chr11    | 28282531               | [C/T] | INTRON                |
| <i>OsMed37_8</i> | LOC_Os11g47760 | Os_chr11    | 28282492               | [A/T] | INTRON                |
| <i>OsMed37_8</i> | LOC_Os11g47760 | Os_chr11    | 28282471               | [T/A] | INTRON                |
| <i>OsMed37_8</i> | LOC_Os11g47760 | Os_chr11    | 28282436               | [T/C] | INTRON                |
| <i>OsMed37_8</i> | LOC_Os11g47760 | Os_chr11    | 28282399               | [T/C] | INTRON                |
| <i>OsMed37_8</i> | LOC_Os11g47760 | Os_chr11    | 28282325               | [T/A] | INTRON                |
| <i>OsMed37_8</i> | LOC_Os11g47760 | Os_chr11    | 28282323               | [T/G] | INTRON                |
| <i>OsMed37_8</i> | LOC_Os11g47760 | Os_chr11    | 28282256               | [T/A] | INTRON                |
| <i>OsMed37_8</i> | LOC_Os11g47760 | Os_chr11    | 28282217               | [A/G] | INTRON                |
| <i>OsMed37_8</i> | LOC_Os11g47760 | Os_chr11    | 28282197               | [C/A] | INTRON                |
| <i>OsMed37_8</i> | LOC_Os11g47760 | Os_chr11    | 28282195               | [C/G] | INTRON                |
| <i>OsMed37_8</i> | LOC_Os11g47760 | Os_chr11    | 28282154               | [A/G] | INTRON                |
| <i>OsMed37_8</i> | LOC_Os11g47760 | Os_chr11    | 28282135               | [C/T] | INTRON                |
| <i>OsMed37_8</i> | LOC_Os11g47760 | Os_chr11    | 28282129               | [T/C] | INTRON                |
| <i>OsMed37_8</i> | LOC_Os11g47760 | Os_chr11    | 28282126               | [A/C] | INTRON                |
| <i>OsMed37_8</i> | LOC_Os11g47760 | Os_chr11    | 28281900               | [A/T] | INTRON                |
| <i>OsMed37_8</i> | LOC_Os11g47760 | Os_chr11    | 28281839               | [G/A] | INTRON                |
| <i>OsMed37_8</i> | LOC_Os11g47760 | Os_chr11    | 28281838               | [A/G] | INTRON                |
| <i>OsMed37_8</i> | LOC_Os11g47760 | Os_chr11    | 28281822               | [A/G] | INTRON                |
| <i>OsMed37_8</i> | LOC_Os11g47760 | Os_chr11    | 28281781               | [A/G] | INTRON                |
| <i>OsMed37_8</i> | LOC_Os11g47760 | Os_chr11    | 28281768               | [T/A] | INTRON                |
| <i>OsMed37_8</i> | LOC_Os11g47760 | Os_chr11    | 28281753               | [T/A] | INTRON                |
| <i>OsMed37_8</i> | LOC_Os11g47760 | Os_chr11    | 28281735               | [T/C] | INTRON                |
| <i>OsMed37_8</i> | LOC_Os11g47760 | Os_chr11    | 28281711               | [C/T] | INTRON                |
| <i>OsMed37_8</i> | LOC_Os11g47760 | Os_chr11    | 28281691               | [A/G] | INTRON                |
| <i>OsMed37_8</i> | LOC_Os11g47760 | Os_chr11    | 28281669               | [T/A] | INTRON                |
| <i>OsMed37_8</i> | LOC_Os11g47760 | Os_chr11    | 28281661               | [C/A] | INTRON                |
| <i>OsMed37_8</i> | LOC_Os11g47760 | Os_chr11    | 28281632               | [T/G] | INTRON                |
| <i>OsMed37_8</i> | LOC_Os11g47760 | Os_chr11    | 28281627               | [A/G] | INTRON                |
| <i>OsMed37_8</i> | LOC_Os11g47760 | Os_chr11    | 28281611               | [C/T] | INTRON                |
| <i>OsMed37_8</i> | LOC_Os11g47760 | Os_chr11    | 28281594               | [A/G] | INTRON                |
| <i>OsMed37_8</i> | LOC_Os11g47760 | Os_chr11    | 28281584               | [A/T] | INTRON                |
| <i>OsMed37_8</i> | LOC_Os11g47760 | Os_chr11    | 28281571               | [C/A] | INTRON                |
| <i>OsMed37_8</i> | LOC_Os11g47760 | Os_chr11    | 28281565               | [T/G] | INTRON                |
| <i>OsMed37_8</i> | LOC_Os11g47760 | Os_chr11    | 28281527               | [A/C] | INTRON                |
| <i>OsMed37_8</i> | LOC_Os11g47760 | Os_chr11    | 28281457               | [G/A] | INTRON                |
| <i>OsMed37_8</i> | LOC_Os11g47760 | Os_chr11    | 28281456               | [G/T] | INTRON                |
| <i>OsMed37_8</i> | LOC_Os11g47760 | Os_chr11    | 28281389               | [G/A] | INTRON                |
| <i>OsMed37_8</i> | LOC_Os11g47760 | Os_chr11    | 28281337               | [G/T] | INTRON                |
| <i>OsMed37_8</i> | LOC_Os11g47750 | Os_chr11    | 28280328               | [C/T] | NON-SYNONYMOUS-CODING |
| <i>OsMed37_8</i> | LOC_Os11g47750 | Os_chr11    | 28280248               | [C/T] | NON-SYNONYMOUS-CODING |



| Mediator genes   | MSU locus ID   | Chromosomes | Physical Position (bp) | SNPs  | Structural Annotation |
|------------------|----------------|-------------|------------------------|-------|-----------------------|
| <i>OsMed37_8</i> | LOC_Os11g47750 | Os_chr11    | 28280245               | [C/T] | NON-SYNONYMOUS-CODING |
| <i>OsMed37_8</i> | LOC_Os11g47750 | Os_chr11    | 28280227               | [T/A] | NON-SYNONYMOUS-CODING |
| <i>OsMed37_8</i> | LOC_Os11g47750 | Os_chr11    | 28280211               | [G/T] | NON-SYNONYMOUS-CODING |
| <i>OsMed37_8</i> | LOC_Os11g47750 | Os_chr11    | 28280191               | [C/T] | NON-SYNONYMOUS-CODING |
| <i>OsMed37_8</i> | LOC_Os11g47750 | Os_chr11    | 28280154               | [G/C] | NON-SYNONYMOUS-CODING |
| <i>OsMed37_8</i> | LOC_Os11g47750 | Os_chr11    | 28280149               | [G/T] | NON-SYNONYMOUS-CODING |
| <i>OsMed37_8</i> | LOC_Os11g47750 | Os_chr11    | 28280118               | [G/A] | NON-SYNONYMOUS-CODING |
| <i>OsMed37_8</i> | LOC_Os11g47750 | Os_chr11    | 28280103               | [T/C] | NON-SYNONYMOUS-CODING |
| <i>OsMed37_8</i> | LOC_Os11g47760 | Os_chr11    | 28283876               | [C/T] | NON-SYNONYMOUS-CODING |
| <i>OsMed37_8</i> | LOC_Os11g47760 | Os_chr11    | 28281055               | [C/T] | REGULATORY            |
| <i>OsMed37_8</i> | LOC_Os11g47760 | Os_chr11    | 28281031               | [C/T] | REGULATORY            |
| <i>OsMed37_8</i> | LOC_Os11g47760 | Os_chr11    | 28281029               | [G/T] | REGULATORY            |
| <i>OsMed37_8</i> | LOC_Os11g47760 | Os_chr11    | 28281028               | [A/C] | REGULATORY            |
| <i>OsMed37_8</i> | LOC_Os11g47750 | Os_chr11    | 28280053               | [C/A] | REGULATORY            |
| <i>OsMed37_8</i> | LOC_Os11g47760 | Os_chr11    | 28284929               | [G/A] | REGULATORY            |
| <i>OsMed37_8</i> | LOC_Os11g47760 | Os_chr11    | 28284951               | [G/A] | REGULATORY            |
| <i>OsMed37_8</i> | LOC_Os11g47760 | Os_chr11    | 28284912               | [C/T] | REGULATORY            |
| <i>OsMed37_8</i> | LOC_Os11g47760 | Os_chr11    | 28285294               | [G/C] | REGULATORY            |
| <i>OsMed37_8</i> | LOC_Os11g47760 | Os_chr11    | 28285292               | [T/C] | REGULATORY            |
| <i>OsMed37_8</i> | LOC_Os11g47760 | Os_chr11    | 28285280               | [A/T] | REGULATORY            |
| <i>OsMed37_8</i> | LOC_Os11g47760 | Os_chr11    | 28285255               | [C/T] | REGULATORY            |
| <i>OsMed37_8</i> | LOC_Os11g47760 | Os_chr11    | 28285245               | [G/T] | REGULATORY            |
| <i>OsMed37_8</i> | LOC_Os11g47760 | Os_chr11    | 28285235               | [G/T] | REGULATORY            |
| <i>OsMed37_8</i> | LOC_Os11g47760 | Os_chr11    | 28285229               | [T/A] | REGULATORY            |
| <i>OsMed37_8</i> | LOC_Os11g47760 | Os_chr11    | 28285199               | [C/G] | REGULATORY            |
| <i>OsMed37_8</i> | LOC_Os11g47760 | Os_chr11    | 28285096               | [C/T] | REGULATORY            |
| <i>OsMed37_8</i> | LOC_Os11g47760 | Os_chr11    | 28285065               | [A/G] | REGULATORY            |
| <i>OsMed37_8</i> | LOC_Os11g47760 | Os_chr11    | 28285063               | [C/T] | REGULATORY            |
| <i>OsMed37_8</i> | LOC_Os11g47760 | Os_chr11    | 28285031               | [T/G] | REGULATORY            |
| <i>OsMed37_8</i> | LOC_Os11g47760 | Os_chr11    | 28284998               | [C/T] | REGULATORY            |
| <i>OsMed37_8</i> | LOC_Os11g47760 | Os_chr11    | 28281021               | [A/T] | REGULATORY            |
| <i>OsMed37_8</i> | LOC_Os11g47760 | Os_chr11    | 28280961               | [G/A] | REGULATORY            |
| <i>OsMed37_8</i> | LOC_Os11g47760 | Os_chr11    | 28280959               | [C/T] | REGULATORY            |
| <i>OsMed37_8</i> | LOC_Os11g47760 | Os_chr11    | 28280931               | [G/C] | REGULATORY            |
| <i>OsMed37_8</i> | LOC_Os11g47760 | Os_chr11    | 28280927               | [C/G] | REGULATORY            |
| <i>OsMed37_8</i> | LOC_Os11g47760 | Os_chr11    | 28280903               | [G/T] | REGULATORY            |
| <i>OsMed37_8</i> | LOC_Os11g47760 | Os_chr11    | 28280902               | [C/G] | REGULATORY            |
| <i>OsMed37_8</i> | LOC_Os11g47760 | Os_chr11    | 28280869               | [T/C] | REGULATORY            |
| <i>OsMed37_8</i> | LOC_Os11g47760 | Os_chr11    | 28280840               | [C/T] | REGULATORY            |
| <i>OsMed37_8</i> | LOC_Os11g47760 | Os_chr11    | 28280821               | [G/A] | REGULATORY            |
| <i>OsMed37_8</i> | LOC_Os11g47760 | Os_chr11    | 28280811               | [G/T] | REGULATORY            |
| <i>OsMed37_8</i> | LOC_Os11g47760 | Os_chr11    | 28280767               | [C/T] | REGULATORY            |
| <i>OsMed37_8</i> | LOC_Os11g47760 | Os_chr11    | 28280749               | [T/C] | REGULATORY            |
| <i>OsMed37_8</i> | LOC_Os11g47760 | Os_chr11    | 28280737               | [G/A] | REGULATORY            |
| <i>OsMed37_8</i> | LOC_Os11g47760 | Os_chr11    | 28280710               | [C/G] | REGULATORY            |
| <i>OsMed37_8</i> | LOC_Os11g47760 | Os_chr11    | 28280707               | [G/A] | REGULATORY            |
| <i>OsMed37_8</i> | LOC_Os11g47760 | Os_chr11    | 28280682               | [T/C] | REGULATORY            |

| Mediator genes   | MSU locus ID   | Chromosomes | Physical Position (bp) | SNPs  | Structural Annotation |
|------------------|----------------|-------------|------------------------|-------|-----------------------|
| <i>OsMed37_8</i> | LOC_Os11g47760 | Os_chr11    | 28280681               | [T/C] | REGULATORY            |
| <i>OsMed37_8</i> | LOC_Os11g47760 | Os_chr11    | 28280675               | [A/G] | REGULATORY            |
| <i>OsMed37_8</i> | LOC_Os11g47760 | Os_chr11    | 28280671               | [A/G] | REGULATORY            |
| <i>OsMed37_8</i> | LOC_Os11g47760 | Os_chr11    | 28280667               | [C/T] | REGULATORY            |
| <i>OsMed37_8</i> | LOC_Os11g47760 | Os_chr11    | 28280662               | [C/A] | REGULATORY            |
| <i>OsMed37_8</i> | LOC_Os11g47760 | Os_chr11    | 28280661               | [T/A] | REGULATORY            |
| <i>OsMed37_8</i> | LOC_Os11g47760 | Os_chr11    | 28280658               | [A/G] | REGULATORY            |
| <i>OsMed37_8</i> | LOC_Os11g47760 | Os_chr11    | 28280655               | [C/T] | REGULATORY            |
| <i>OsMed37_8</i> | LOC_Os11g47760 | Os_chr11    | 28280650               | [C/T] | REGULATORY            |
| <i>OsMed37_8</i> | LOC_Os11g47760 | Os_chr11    | 28280644               | [A/G] | REGULATORY            |
| <i>OsMed37_8</i> | LOC_Os11g47760 | Os_chr11    | 28280643               | [C/T] | REGULATORY            |
| <i>OsMed37_8</i> | LOC_Os11g47760 | Os_chr11    | 28280636               | [A/G] | REGULATORY            |
| <i>OsMed37_8</i> | LOC_Os11g47760 | Os_chr11    | 28280632               | [C/T] | REGULATORY            |
| <i>OsMed37_8</i> | LOC_Os11g47760 | Os_chr11    | 28280631               | [A/G] | REGULATORY            |
| <i>OsMed37_8</i> | LOC_Os11g47760 | Os_chr11    | 28280627               | [G/A] | REGULATORY            |
| <i>OsMed37_8</i> | LOC_Os11g47760 | Os_chr11    | 28280618               | [G/A] | REGULATORY            |
| <i>OsMed37_8</i> | LOC_Os11g47760 | Os_chr11    | 28280502               | [G/A] | REGULATORY            |
| <i>OsMed37_8</i> | LOC_Os11g47760 | Os_chr11    | 28280494               | [C/G] | REGULATORY            |
| <i>OsMed37_8</i> | LOC_Os11g47760 | Os_chr11    | 28280490               | [G/C] | REGULATORY            |
| <i>OsMed37_8</i> | LOC_Os11g47760 | Os_chr11    | 28280468               | [A/G] | REGULATORY            |
| <i>OsMed37_8</i> | LOC_Os11g47760 | Os_chr11    | 28280462               | [G/A] | REGULATORY            |
| <i>OsMed37_8</i> | LOC_Os11g47750 | Os_chr11    | 28280339               | [G/A] | SYNONYMOUS-CODING     |
| <i>OsMed37_8</i> | LOC_Os11g47750 | Os_chr11    | 28280180               | [T/G] | SYNONYMOUS-CODING     |
| <i>OsMed37_8</i> | LOC_Os11g47760 | Os_chr11    | 28281318               | [C/T] | SYNONYMOUS-CODING     |
| <i>OsMed37_8</i> | LOC_Os11g47760 | Os_chr11    | 28281174               | [T/G] | SYNONYMOUS-CODING     |
| <i>OsMed37_8</i> | LOC_Os11g47760 | Os_chr11    | 28281156               | [C/A] | SYNONYMOUS-CODING     |
| <i>OsMed37_8</i> | LOC_Os11g47760 | Os_chr11    | 28281153               | [G/T] | SYNONYMOUS-CODING     |
| <i>OsMed37_8</i> | LOC_Os11g47760 | Os_chr11    | 28281147               | [T/G] | SYNONYMOUS-CODING     |
| <i>OsMed37_8</i> | LOC_Os11g47760 | Os_chr11    | 28283901               | [T/C] | SYNONYMOUS-CODING     |
| <i>OsMed37_8</i> | LOC_Os11g47760 | Os_chr11    | 28283857               | [C/T] | SYNONYMOUS-CODING     |
| <i>OsMed4_1</i>  | LOC_Os09g36890 | Os_chr09    | 21274027               | [T/C] | INTRON                |
| <i>OsMed4_1</i>  | LOC_Os09g36890 | Os_chr09    | 21273819               | [C/A] | INTRON                |
| <i>OsMed4_1</i>  | LOC_Os09g36890 | Os_chr09    | 21274537               | [T/A] | INTRON                |
| <i>OsMed4_1</i>  | LOC_Os09g36890 | Os_chr09    | 21274332               | [C/T] | INTRON                |
| <i>OsMed4_1</i>  | LOC_Os09g36890 | Os_chr09    | 21274258               | [G/A] | INTRON                |
| <i>OsMed4_1</i>  | LOC_Os09g36900 | Os_chr09    | 21276780               | [C/A] | INTRON                |
| <i>OsMed4_1</i>  | LOC_Os09g36900 | Os_chr09    | 21276689               | [C/A] | INTRON                |
| <i>OsMed4_1</i>  | LOC_Os09g36890 | Os_chr09    | 21275709               | [C/A] | NON-SYNONYMOUS-CODING |
| <i>OsMed4_1</i>  | LOC_Os09g36890 | Os_chr09    | 21274906               | [C/T] | NON-SYNONYMOUS-CODING |
| <i>OsMed4_1</i>  | LOC_Os09g36890 | Os_chr09    | 21274695               | [T/G] | NON-SYNONYMOUS-CODING |
| <i>OsMed4_1</i>  | LOC_Os09g36900 | Os_chr09    | 21276236               | [C/A] | NON-SYNONYMOUS-CODING |
| <i>OsMed4_1</i>  | LOC_Os09g36900 | Os_chr09    | 21276233               | [G/T] | NON-SYNONYMOUS-CODING |
| <i>OsMed4_1</i>  | LOC_Os09g36890 | Os_chr09    | 21273341               | [G/A] | REGULATORY            |
| <i>OsMed4_1</i>  | LOC_Os09g36900 | Os_chr09    | 21275952               | [T/A] | REGULATORY            |
| <i>OsMed4_1</i>  | LOC_Os09g36900 | Os_chr09    | 21275887               | [A/T] | REGULATORY            |
| <i>OsMed4_1</i>  | LOC_Os09g36900 | Os_chr09    | 21275884               | [C/T] | REGULATORY            |
| <i>OsMed4_1</i>  | LOC_Os09g36890 | Os_chr09    | 21275285               | [C/T] | SYNONYMOUS-CODING     |

| Mediator genes  | MSU locus ID   | Chromosomes | Physical Position (bp) | SNPs  | Structural Annotation |
|-----------------|----------------|-------------|------------------------|-------|-----------------------|
| <i>OsMed4_1</i> | LOC_Os09g36890 | Os_chr09    | 21274748               | [C/T] | SYNONYMOUS-CODING     |
| <i>OsMed4_1</i> | LOC_Os09g36890 | Os_chr09    | 21274634               | [C/T] | SYNONYMOUS-CODING     |
| <i>OsMed4_2</i> | LOC_Os11g05150 | Os_chr11    | 2261046                | [G/A] | INTRON                |
| <i>OsMed4_2</i> | LOC_Os11g05150 | Os_chr11    | 2261017                | [G/T] | INTRON                |
| <i>OsMed4_2</i> | LOC_Os11g05150 | Os_chr11    | 2260945                | [C/T] | INTRON                |
| <i>OsMed4_2</i> | LOC_Os11g05150 | Os_chr11    | 2260918                | [C/T] | INTRON                |
| <i>OsMed4_2</i> | LOC_Os11g05150 | Os_chr11    | 2260909                | [T/C] | INTRON                |
| <i>OsMed4_2</i> | LOC_Os11g05150 | Os_chr11    | 2260878                | [T/A] | INTRON                |
| <i>OsMed4_2</i> | LOC_Os11g05150 | Os_chr11    | 2260861                | [C/T] | INTRON                |
| <i>OsMed4_2</i> | LOC_Os11g05150 | Os_chr11    | 2261164                | [G/T] | NON-SYNONYMOUS-CODING |
| <i>OsMed4_2</i> | LOC_Os11g05150 | Os_chr11    | 2260726                | [G/A] | NON-SYNONYMOUS-CODING |
| <i>OsMed4_2</i> | LOC_Os11g05150 | Os_chr11    | 2260577                | [C/T] | NON-SYNONYMOUS-CODING |
| <i>OsMed4_2</i> | LOC_Os11g05150 | Os_chr11    | 2261376                | [C/T] | REGULATORY            |
| <i>OsMed4_2</i> | LOC_Os11g05150 | Os_chr11    | 2261331                | [G/T] | REGULATORY            |
| <i>OsMed4_2</i> | LOC_Os11g05150 | Os_chr11    | 2260698                | [C/T] | SYNONYMOUS-CODING     |
| <i>OsMed4_2</i> | LOC_Os11g05150 | Os_chr11    | 2260686                | [G/A] | SYNONYMOUS-CODING     |
| <i>OsMed4_2</i> | LOC_Os11g05150 | Os_chr11    | 2260656                | [G/T] | SYNONYMOUS-CODING     |
| <i>OsMed4_2</i> | LOC_Os11g05150 | Os_chr11    | 2260607                | [G/A] | SYNONYMOUS-CODING     |
| <i>OsMed4_2</i> | LOC_Os11g05150 | Os_chr11    | 2260572                | [T/C] | SYNONYMOUS-CODING     |
| <i>OsMed5_1</i> | LOC_Os05g24684 | Os_chr05    | 14250894               | [C/T] | INTRON                |
| <i>OsMed5_1</i> | LOC_Os05g24684 | Os_chr05    | 14250864               | [C/T] | INTRON                |
| <i>OsMed5_1</i> | LOC_Os05g24684 | Os_chr05    | 14250861               | [A/C] | INTRON                |
| <i>OsMed5_1</i> | LOC_Os05g24684 | Os_chr05    | 14250653               | [G/C] | INTRON                |
| <i>OsMed5_1</i> | LOC_Os05g24684 | Os_chr05    | 14250298               | [G/A] | INTRON                |
| <i>OsMed5_1</i> | LOC_Os05g24684 | Os_chr05    | 14250209               | [G/A] | INTRON                |
| <i>OsMed5_1</i> | LOC_Os05g24684 | Os_chr05    | 14249946               | [T/C] | INTRON                |
| <i>OsMed5_1</i> | LOC_Os05g24684 | Os_chr05    | 14249607               | [G/A] | INTRON                |
| <i>OsMed5_1</i> | LOC_Os05g24684 | Os_chr05    | 14249604               | [T/A] | INTRON                |
| <i>OsMed5_1</i> | LOC_Os05g24684 | Os_chr05    | 14249468               | [A/G] | INTRON                |
| <i>OsMed5_1</i> | LOC_Os05g24684 | Os_chr05    | 14249326               | [C/A] | INTRON                |
| <i>OsMed5_1</i> | LOC_Os05g24684 | Os_chr05    | 14249314               | [G/A] | INTRON                |
| <i>OsMed5_1</i> | LOC_Os05g24684 | Os_chr05    | 14248423               | [C/A] | INTRON                |
| <i>OsMed5_1</i> | LOC_Os05g24684 | Os_chr05    | 14247827               | [G/A] | INTRON                |
| <i>OsMed5_1</i> | LOC_Os05g24684 | Os_chr05    | 14247785               | [C/G] | INTRON                |
| <i>OsMed5_1</i> | LOC_Os05g24684 | Os_chr05    | 14247588               | [C/T] | INTRON                |
| <i>OsMed5_1</i> | LOC_Os05g24684 | Os_chr05    | 14247416               | [A/C] | INTRON                |
| <i>OsMed5_1</i> | LOC_Os05g24684 | Os_chr05    | 14246967               | [A/G] | INTRON                |
| <i>OsMed5_1</i> | LOC_Os05g24684 | Os_chr05    | 14246861               | [G/C] | INTRON                |
| <i>OsMed5_1</i> | LOC_Os05g24684 | Os_chr05    | 14246686               | [A/C] | INTRON                |
| <i>OsMed5_1</i> | LOC_Os05g24684 | Os_chr05    | 14246483               | [C/G] | INTRON                |
| <i>OsMed5_1</i> | LOC_Os05g24684 | Os_chr05    | 14246400               | [C/T] | INTRON                |
| <i>OsMed5_1</i> | LOC_Os05g24684 | Os_chr05    | 14245851               | [A/T] | INTRON                |
| <i>OsMed5_1</i> | LOC_Os05g24684 | Os_chr05    | 14245083               | [T/C] | INTRON                |
| <i>OsMed5_1</i> | LOC_Os05g24684 | Os_chr05    | 14244964               | [G/A] | INTRON                |
| <i>OsMed5_1</i> | LOC_Os05g24684 | Os_chr05    | 14243426               | [G/C] | INTRON                |
| <i>OsMed5_1</i> | LOC_Os05g24684 | Os_chr05    | 14243359               | [G/A] | INTRON                |
| <i>OsMed5_1</i> | LOC_Os05g24684 | Os_chr05    | 14243358               | [C/T] | INTRON                |

| Mediator genes  | MSU locus ID   | Chromosomes | Physical Position (bp) | SNPs  | Structural Annotation |
|-----------------|----------------|-------------|------------------------|-------|-----------------------|
| <i>OsMed5_1</i> | LOC_Os05g24684 | Os_chr05    | 14243343               | [G/A] | INTRON                |
| <i>OsMed5_1</i> | LOC_Os05g24684 | Os_chr05    | 14241609               | [T/A] | INTRON                |
| <i>OsMed5_1</i> | LOC_Os05g24684 | Os_chr05    | 14241595               | [G/A] | INTRON                |
| <i>OsMed5_1</i> | LOC_Os05g24684 | Os_chr05    | 14241579               | [A/G] | INTRON                |
| <i>OsMed5_1</i> | LOC_Os05g24684 | Os_chr05    | 14240906               | [G/A] | INTRON                |
| <i>OsMed5_1</i> | LOC_Os05g24684 | Os_chr05    | 14240776               | [C/A] | INTRON                |
| <i>OsMed5_1</i> | LOC_Os05g24684 | Os_chr05    | 14240592               | [C/A] | INTRON                |
| <i>OsMed5_1</i> | LOC_Os05g24684 | Os_chr05    | 14240079               | [A/G] | INTRON                |
| <i>OsMed5_1</i> | LOC_Os05g24684 | Os_chr05    | 14239976               | [C/T] | INTRON                |
| <i>OsMed5_1</i> | LOC_Os05g24684 | Os_chr05    | 14239944               | [C/A] | INTRON                |
| <i>OsMed5_1</i> | LOC_Os05g24684 | Os_chr05    | 14239781               | [C/A] | INTRON                |
| <i>OsMed5_1</i> | LOC_Os05g24684 | Os_chr05    | 14239302               | [G/A] | INTRON                |
| <i>OsMed5_1</i> | LOC_Os05g24684 | Os_chr05    | 14239052               | [C/A] | INTRON                |
| <i>OsMed5_1</i> | LOC_Os05g24684 | Os_chr05    | 14245932               | [G/T] | NON-SYNONYMOUS-CODING |
| <i>OsMed5_1</i> | LOC_Os05g24684 | Os_chr05    | 14244026               | [C/T] | NON-SYNONYMOUS-CODING |
| <i>OsMed5_1</i> | LOC_Os05g24684 | Os_chr05    | 14242951               | [G/A] | NON-SYNONYMOUS-CODING |
| <i>OsMed5_1</i> | LOC_Os05g24684 | Os_chr05    | 14240248               | [G/A] | NON-SYNONYMOUS-CODING |
| <i>OsMed5_1</i> | LOC_Os05g24684 | Os_chr05    | 14238287               | [C/T] | NON-SYNONYMOUS-CODING |
| <i>OsMed5_1</i> | LOC_Os05g24684 | Os_chr05    | 14251359               | [C/T] | REGULATORY            |
| <i>OsMed5_1</i> | LOC_Os05g24684 | Os_chr05    | 14251315               | [A/G] | REGULATORY            |
| <i>OsMed5_1</i> | LOC_Os05g24684 | Os_chr05    | 14237751               | [A/G] | REGULATORY            |
| <i>OsMed5_1</i> | LOC_Os05g24684 | Os_chr05    | 14237491               | [T/A] | REGULATORY            |
| <i>OsMed5_1</i> | LOC_Os05g24684 | Os_chr05    | 14252323               | [G/A] | REGULATORY            |
| <i>OsMed5_1</i> | LOC_Os05g24684 | Os_chr05    | 14252318               | [G/A] | REGULATORY            |
| <i>OsMed5_1</i> | LOC_Os05g24684 | Os_chr05    | 14252273               | [T/C] | REGULATORY            |
| <i>OsMed5_1</i> | LOC_Os05g24684 | Os_chr05    | 14252248               | [G/A] | REGULATORY            |
| <i>OsMed5_1</i> | LOC_Os05g24684 | Os_chr05    | 14252245               | [G/A] | REGULATORY            |
| <i>OsMed5_1</i> | LOC_Os05g24684 | Os_chr05    | 14252237               | [C/T] | REGULATORY            |
| <i>OsMed5_1</i> | LOC_Os05g24684 | Os_chr05    | 14252202               | [G/A] | REGULATORY            |
| <i>OsMed5_1</i> | LOC_Os05g24684 | Os_chr05    | 14252096               | [C/A] | REGULATORY            |
| <i>OsMed5_1</i> | LOC_Os05g24684 | Os_chr05    | 14252068               | [C/T] | REGULATORY            |
| <i>OsMed5_1</i> | LOC_Os05g24684 | Os_chr05    | 14252034               | [C/T] | REGULATORY            |
| <i>OsMed5_1</i> | LOC_Os05g24684 | Os_chr05    | 14251976               | [G/A] | REGULATORY            |
| <i>OsMed5_1</i> | LOC_Os05g24684 | Os_chr05    | 14251949               | [T/C] | REGULATORY            |
| <i>OsMed5_1</i> | LOC_Os05g24684 | Os_chr05    | 14251903               | [G/C] | REGULATORY            |
| <i>OsMed5_1</i> | LOC_Os05g24684 | Os_chr05    | 14251873               | [C/T] | REGULATORY            |
| <i>OsMed5_1</i> | LOC_Os05g24684 | Os_chr05    | 14251844               | [A/G] | REGULATORY            |
| <i>OsMed5_1</i> | LOC_Os05g24684 | Os_chr05    | 14251739               | [G/A] | REGULATORY            |
| <i>OsMed5_1</i> | LOC_Os05g24684 | Os_chr05    | 14251727               | [A/G] | REGULATORY            |
| <i>OsMed5_1</i> | LOC_Os05g24684 | Os_chr05    | 14251690               | [G/A] | REGULATORY            |
| <i>OsMed5_1</i> | LOC_Os05g24684 | Os_chr05    | 14251678               | [G/A] | REGULATORY            |
| <i>OsMed5_1</i> | LOC_Os05g24684 | Os_chr05    | 14251659               | [C/T] | REGULATORY            |
| <i>OsMed5_1</i> | LOC_Os05g24684 | Os_chr05    | 14251649               | [G/A] | REGULATORY            |
| <i>OsMed5_1</i> | LOC_Os05g24684 | Os_chr05    | 14251648               | [T/C] | REGULATORY            |
| <i>OsMed5_1</i> | LOC_Os05g24684 | Os_chr05    | 14251620               | [G/A] | REGULATORY            |
| <i>OsMed5_1</i> | LOC_Os05g24684 | Os_chr05    | 14251618               | [C/T] | REGULATORY            |
| <i>OsMed5_1</i> | LOC_Os05g24684 | Os_chr05    | 14251603               | [C/T] | REGULATORY            |

| Mediator genes  | MSU locus ID   | Chromosomes | Physical Position (bp) | SNPs  | Structural Annotation |
|-----------------|----------------|-------------|------------------------|-------|-----------------------|
| <i>OsMed5_1</i> | LOC_Os05g24684 | Os_chr05    | 14251599               | [T/C] | REGULATORY            |
| <i>OsMed5_1</i> | LOC_Os05g24684 | Os_chr05    | 14251594               | [T/C] | REGULATORY            |
| <i>OsMed5_1</i> | LOC_Os05g24684 | Os_chr05    | 14251576               | [C/T] | REGULATORY            |
| <i>OsMed5_1</i> | LOC_Os05g24684 | Os_chr05    | 14251575               | [A/G] | REGULATORY            |
| <i>OsMed5_1</i> | LOC_Os05g24684 | Os_chr05    | 14251549               | [A/G] | REGULATORY            |
| <i>OsMed5_1</i> | LOC_Os05g24684 | Os_chr05    | 14251491               | [A/G] | REGULATORY            |
| <i>OsMed5_1</i> | LOC_Os05g24684 | Os_chr05    | 14251477               | [C/A] | REGULATORY            |
| <i>OsMed5_1</i> | LOC_Os05g24684 | Os_chr05    | 14251457               | [T/C] | REGULATORY            |
| <i>OsMed5_1</i> | LOC_Os05g24684 | Os_chr05    | 14251430               | [T/C] | REGULATORY            |
| <i>OsMed5_1</i> | LOC_Os05g24684 | Os_chr05    | 14244636               | [G/A] | SYNONYMOUS-CODING     |
| <i>OsMed5_1</i> | LOC_Os05g24684 | Os_chr05    | 14244462               | [A/T] | SYNONYMOUS-CODING     |
| <i>OsMed5_1</i> | LOC_Os05g24684 | Os_chr05    | 14238485               | [T/C] | SYNONYMOUS-CODING     |
| <i>OsMed5_1</i> | LOC_Os05g24684 | Os_chr05    | 14237966               | [G/A] | SYNONYMOUS-CODING     |
| <i>OsMed5_1</i> | LOC_Os05g24684 | Os_chr05    | 14237942               | [A/G] | SYNONYMOUS-CODING     |
| <i>OsMed5_2</i> | LOC_Os07g11000 | Os_chr07    | 6041924                | [A/C] | INTRON                |
| <i>OsMed5_2</i> | LOC_Os07g11000 | Os_chr07    | 6041828                | [A/T] | INTRON                |
| <i>OsMed5_2</i> | LOC_Os07g11000 | Os_chr07    | 6041596                | [A/G] | INTRON                |
| <i>OsMed5_2</i> | LOC_Os07g11000 | Os_chr07    | 6041536                | [T/G] | INTRON                |
| <i>OsMed5_2</i> | LOC_Os07g11000 | Os_chr07    | 6041532                | [T/G] | INTRON                |
| <i>OsMed5_2</i> | LOC_Os07g11000 | Os_chr07    | 6040780                | [T/C] | INTRON                |
| <i>OsMed5_2</i> | LOC_Os07g11000 | Os_chr07    | 6040311                | [G/A] | INTRON                |
| <i>OsMed5_2</i> | LOC_Os07g11000 | Os_chr07    | 6040299                | [C/T] | INTRON                |
| <i>OsMed5_2</i> | LOC_Os07g11000 | Os_chr07    | 6040248                | [A/G] | INTRON                |
| <i>OsMed5_2</i> | LOC_Os07g11000 | Os_chr07    | 6040210                | [G/A] | INTRON                |
| <i>OsMed5_2</i> | LOC_Os07g11000 | Os_chr07    | 6039926                | [A/T] | INTRON                |
| <i>OsMed5_2</i> | LOC_Os07g11000 | Os_chr07    | 6039709                | [T/C] | INTRON                |
| <i>OsMed5_2</i> | LOC_Os07g11000 | Os_chr07    | 6039675                | [T/C] | INTRON                |
| <i>OsMed5_2</i> | LOC_Os07g11000 | Os_chr07    | 6039597                | [T/C] | INTRON                |
| <i>OsMed5_2</i> | LOC_Os07g11000 | Os_chr07    | 6039540                | [A/C] | INTRON                |
| <i>OsMed5_2</i> | LOC_Os07g11000 | Os_chr07    | 6039527                | [T/C] | INTRON                |
| <i>OsMed5_2</i> | LOC_Os07g11000 | Os_chr07    | 6039332                | [T/C] | INTRON                |
| <i>OsMed5_2</i> | LOC_Os07g11000 | Os_chr07    | 6038777                | [T/C] | INTRON                |
| <i>OsMed5_2</i> | LOC_Os07g11000 | Os_chr07    | 6038128                | [T/C] | INTRON                |
| <i>OsMed5_2</i> | LOC_Os07g11000 | Os_chr07    | 6037257                | [T/C] | INTRON                |
| <i>OsMed5_2</i> | LOC_Os07g11000 | Os_chr07    | 6036258                | [G/A] | INTRON                |
| <i>OsMed5_2</i> | LOC_Os07g11000 | Os_chr07    | 6035908                | [G/A] | INTRON                |
| <i>OsMed5_2</i> | LOC_Os07g11000 | Os_chr07    | 6042579                | [G/C] | NON-SYNONYMOUS-CODING |
| <i>OsMed5_2</i> | LOC_Os07g11000 | Os_chr07    | 6041201                | [G/T] | NON-SYNONYMOUS-CODING |
| <i>OsMed5_2</i> | LOC_Os07g11000 | Os_chr07    | 6041057                | [G/A] | NON-SYNONYMOUS-CODING |
| <i>OsMed5_2</i> | LOC_Os07g11000 | Os_chr07    | 6041049                | [G/T] | NON-SYNONYMOUS-CODING |
| <i>OsMed5_2</i> | LOC_Os07g11000 | Os_chr07    | 6038627                | [A/G] | NON-SYNONYMOUS-CODING |
| <i>OsMed5_2</i> | LOC_Os07g11000 | Os_chr07    | 6038052                | [C/T] | NON-SYNONYMOUS-CODING |
| <i>OsMed5_2</i> | LOC_Os07g11000 | Os_chr07    | 6036086                | [T/G] | NON-SYNONYMOUS-CODING |
| <i>OsMed5_2</i> | LOC_Os07g11000 | Os_chr07    | 6043100                | [G/A] | REGULATORY            |
| <i>OsMed5_2</i> | LOC_Os07g11000 | Os_chr07    | 6043537                | [T/C] | REGULATORY            |
| <i>OsMed5_2</i> | LOC_Os07g11000 | Os_chr07    | 6043513                | [G/C] | REGULATORY            |
| <i>OsMed5_2</i> | LOC_Os07g11000 | Os_chr07    | 6043480                | [A/G] | REGULATORY            |

| Mediator genes  | MSU locus ID   | Chromosomes | Physical Position (bp) | SNPs  | Structural Annotation |
|-----------------|----------------|-------------|------------------------|-------|-----------------------|
| <i>OsMed5_2</i> | LOC_Os07g11000 | Os_chr07    | 6043449                | [C/T] | REGULATORY            |
| <i>OsMed5_2</i> | LOC_Os07g11000 | Os_chr07    | 6043441                | [G/A] | REGULATORY            |
| <i>OsMed5_2</i> | LOC_Os07g11000 | Os_chr07    | 6043426                | [C/T] | REGULATORY            |
| <i>OsMed5_2</i> | LOC_Os07g11000 | Os_chr07    | 6043320                | [T/G] | REGULATORY            |
| <i>OsMed5_2</i> | LOC_Os07g11000 | Os_chr07    | 6043243                | [A/G] | REGULATORY            |
| <i>OsMed5_2</i> | LOC_Os07g11000 | Os_chr07    | 6043189                | [T/A] | REGULATORY            |
| <i>OsMed5_2</i> | LOC_Os07g11000 | Os_chr07    | 6043136                | [C/A] | REGULATORY            |
| <i>OsMed5_2</i> | LOC_Os07g11000 | Os_chr07    | 6034926                | [C/A] | REGULATORY            |
| <i>OsMed5_2</i> | LOC_Os07g11000 | Os_chr07    | 6034903                | [C/A] | REGULATORY            |
| <i>OsMed5_2</i> | LOC_Os07g11000 | Os_chr07    | 6034759                | [C/T] | REGULATORY            |
| <i>OsMed5_2</i> | LOC_Os07g11000 | Os_chr07    | 6034741                | [G/A] | REGULATORY            |
| <i>OsMed5_2</i> | LOC_Os07g11000 | Os_chr07    | 6034735                | [C/T] | REGULATORY            |
| <i>OsMed5_2</i> | LOC_Os07g11000 | Os_chr07    | 6034699                | [T/C] | REGULATORY            |
| <i>OsMed5_2</i> | LOC_Os07g11000 | Os_chr07    | 6034689                | [G/T] | REGULATORY            |
| <i>OsMed5_2</i> | LOC_Os07g11000 | Os_chr07    | 6034599                | [G/A] | REGULATORY            |
| <i>OsMed5_2</i> | LOC_Os07g11000 | Os_chr07    | 6034591                | [G/A] | REGULATORY            |
| <i>OsMed5_2</i> | LOC_Os07g11000 | Os_chr07    | 6034510                | [A/G] | REGULATORY            |
| <i>OsMed5_2</i> | LOC_Os07g11000 | Os_chr07    | 6034491                | [A/C] | REGULATORY            |
| <i>OsMed5_2</i> | LOC_Os07g11000 | Os_chr07    | 6034368                | [G/A] | REGULATORY            |
| <i>OsMed5_2</i> | LOC_Os07g11000 | Os_chr07    | 6034361                | [C/A] | REGULATORY            |
| <i>OsMed5_2</i> | LOC_Os07g11000 | Os_chr07    | 6034316                | [A/T] | REGULATORY            |
| <i>OsMed5_2</i> | LOC_Os07g11000 | Os_chr07    | 6034279                | [T/C] | REGULATORY            |
| <i>OsMed5_2</i> | LOC_Os07g11000 | Os_chr07    | 6034276                | [C/T] | REGULATORY            |
| <i>OsMed5_2</i> | LOC_Os07g11000 | Os_chr07    | 6034259                | [C/T] | REGULATORY            |
| <i>OsMed5_2</i> | LOC_Os07g11000 | Os_chr07    | 6034257                | [C/T] | REGULATORY            |
| <i>OsMed5_2</i> | LOC_Os07g11000 | Os_chr07    | 6034243                | [A/T] | REGULATORY            |
| <i>OsMed5_2</i> | LOC_Os07g11000 | Os_chr07    | 6034226                | [A/G] | REGULATORY            |
| <i>OsMed5_2</i> | LOC_Os07g11000 | Os_chr07    | 6034151                | [C/A] | REGULATORY            |
| <i>OsMed5_2</i> | LOC_Os07g11000 | Os_chr07    | 6034141                | [A/G] | REGULATORY            |
| <i>OsMed5_2</i> | LOC_Os07g11000 | Os_chr07    | 6034139                | [C/A] | REGULATORY            |
| <i>OsMed5_2</i> | LOC_Os07g11000 | Os_chr07    | 6034100                | [T/G] | REGULATORY            |
| <i>OsMed5_2</i> | LOC_Os07g11000 | Os_chr07    | 6043025                | [C/T] | SYNONYMOUS-CODING     |
| <i>OsMed5_2</i> | LOC_Os07g11000 | Os_chr07    | 6041411                | [C/T] | SYNONYMOUS-CODING     |
| <i>OsMed5_2</i> | LOC_Os07g11000 | Os_chr07    | 6040685                | [C/T] | SYNONYMOUS-CODING     |
| <i>OsMed5_2</i> | LOC_Os07g11000 | Os_chr07    | 6038446                | [C/T] | SYNONYMOUS-CODING     |
| <i>OsMed5_3</i> | LOC_Os07g48350 | Os_chr07    | 28898126               | [T/G] | INTRON                |
| <i>OsMed5_3</i> | LOC_Os07g48350 | Os_chr07    | 28898094               | [T/G] | INTRON                |
| <i>OsMed5_3</i> | LOC_Os07g48350 | Os_chr07    | 28898075               | [C/G] | INTRON                |
| <i>OsMed5_3</i> | LOC_Os07g48350 | Os_chr07    | 28897310               | [T/G] | INTRON                |
| <i>OsMed5_3</i> | LOC_Os07g48350 | Os_chr07    | 28897101               | [A/G] | INTRON                |
| <i>OsMed5_3</i> | LOC_Os07g48350 | Os_chr07    | 28896513               | [G/T] | INTRON                |
| <i>OsMed5_3</i> | LOC_Os07g48350 | Os_chr07    | 28896321               | [A/G] | INTRON                |
| <i>OsMed5_3</i> | LOC_Os07g48350 | Os_chr07    | 28896040               | [C/A] | INTRON                |
| <i>OsMed5_3</i> | LOC_Os07g48350 | Os_chr07    | 28895826               | [T/A] | INTRON                |
| <i>OsMed5_3</i> | LOC_Os07g48350 | Os_chr07    | 28895476               | [G/A] | INTRON                |
| <i>OsMed5_3</i> | LOC_Os07g48350 | Os_chr07    | 28895459               | [T/A] | INTRON                |
| <i>OsMed5_3</i> | LOC_Os07g48350 | Os_chr07    | 28895396               | [C/T] | INTRON                |

| Mediator genes  | MSU locus ID   | Chromosomes | Physical Position (bp) | SNPs  | Structural Annotation |
|-----------------|----------------|-------------|------------------------|-------|-----------------------|
| <i>OsMed5_3</i> | LOC_Os07g48350 | Os_chr07    | 28894749               | [T/A] | INTRON                |
| <i>OsMed5_3</i> | LOC_Os07g48350 | Os_chr07    | 28894010               | [A/T] | INTRON                |
| <i>OsMed5_3</i> | LOC_Os07g48350 | Os_chr07    | 28893359               | [A/T] | INTRON                |
| <i>OsMed5_3</i> | LOC_Os07g48350 | Os_chr07    | 28892939               | [G/T] | INTRON                |
| <i>OsMed5_3</i> | LOC_Os07g48350 | Os_chr07    | 28892518               | [A/G] | INTRON                |
| <i>OsMed5_3</i> | LOC_Os07g48350 | Os_chr07    | 28899486               | [G/A] | NON-SYNONYMOUS-CODING |
| <i>OsMed5_3</i> | LOC_Os07g48350 | Os_chr07    | 28896172               | [G/A] | NON-SYNONYMOUS-CODING |
| <i>OsMed5_3</i> | LOC_Os07g48350 | Os_chr07    | 28893827               | [G/A] | NON-SYNONYMOUS-CODING |
| <i>OsMed5_3</i> | LOC_Os07g48350 | Os_chr07    | 28893653               | [C/T] | NON-SYNONYMOUS-CODING |
| <i>OsMed5_3</i> | LOC_Os07g48350 | Os_chr07    | 28893250               | [G/A] | NON-SYNONYMOUS-CODING |
| <i>OsMed5_3</i> | LOC_Os07g48350 | Os_chr07    | 28892144               | [T/A] | REGULATORY            |
| <i>OsMed5_3</i> | LOC_Os07g48350 | Os_chr07    | 28892167               | [C/T] | REGULATORY            |
| <i>OsMed5_3</i> | LOC_Os07g48350 | Os_chr07    | 28892108               | [C/T] | REGULATORY            |
| <i>OsMed5_3</i> | LOC_Os07g48350 | Os_chr07    | 28892054               | [G/T] | REGULATORY            |
| <i>OsMed5_3</i> | LOC_Os07g48350 | Os_chr07    | 28891781               | [T/G] | REGULATORY            |
| <i>OsMed5_3</i> | LOC_Os07g48350 | Os_chr07    | 28891753               | [A/C] | REGULATORY            |
| <i>OsMed5_3</i> | LOC_Os07g48350 | Os_chr07    | 28891698               | [A/C] | REGULATORY            |
| <i>OsMed5_3</i> | LOC_Os07g48350 | Os_chr07    | 28891636               | [A/G] | REGULATORY            |
| <i>OsMed5_3</i> | LOC_Os07g48350 | Os_chr07    | 28891604               | [C/T] | REGULATORY            |
| <i>OsMed5_3</i> | LOC_Os07g48350 | Os_chr07    | 28891501               | [C/T] | REGULATORY            |
| <i>OsMed5_3</i> | LOC_Os07g48350 | Os_chr07    | 28891491               | [C/T] | REGULATORY            |
| <i>OsMed5_3</i> | LOC_Os07g48350 | Os_chr07    | 28891479               | [A/G] | REGULATORY            |
| <i>OsMed5_3</i> | LOC_Os07g48350 | Os_chr07    | 28891469               | [G/A] | REGULATORY            |
| <i>OsMed5_3</i> | LOC_Os07g48350 | Os_chr07    | 28891435               | [G/A] | REGULATORY            |
| <i>OsMed5_3</i> | LOC_Os07g48350 | Os_chr07    | 28891428               | [T/C] | REGULATORY            |
| <i>OsMed5_3</i> | LOC_Os07g48350 | Os_chr07    | 28891409               | [G/A] | REGULATORY            |
| <i>OsMed5_3</i> | LOC_Os07g48350 | Os_chr07    | 28891385               | [G/A] | REGULATORY            |
| <i>OsMed5_3</i> | LOC_Os07g48350 | Os_chr07    | 28891377               | [C/T] | REGULATORY            |
| <i>OsMed5_3</i> | LOC_Os07g48350 | Os_chr07    | 28891354               | [G/A] | REGULATORY            |
| <i>OsMed5_3</i> | LOC_Os07g48350 | Os_chr07    | 28891345               | [G/A] | REGULATORY            |
| <i>OsMed5_3</i> | LOC_Os07g48350 | Os_chr07    | 28891229               | [T/G] | REGULATORY            |
| <i>OsMed5_3</i> | LOC_Os07g48350 | Os_chr07    | 28891221               | [C/T] | REGULATORY            |
| <i>OsMed5_3</i> | LOC_Os07g48350 | Os_chr07    | 28891196               | [C/T] | REGULATORY            |
| <i>OsMed5_3</i> | LOC_Os07g48350 | Os_chr07    | 28891191               | [C/T] | REGULATORY            |
| <i>OsMed5_3</i> | LOC_Os07g48350 | Os_chr07    | 28891109               | [C/A] | REGULATORY            |
| <i>OsMed5_3</i> | LOC_Os07g48350 | Os_chr07    | 28899531               | [C/T] | SYNONYMOUS-CODING     |
| <i>OsMed5_3</i> | LOC_Os07g48350 | Os_chr07    | 28898705               | [C/T] | SYNONYMOUS-CODING     |
| <i>OsMed5_3</i> | LOC_Os07g48350 | Os_chr07    | 28897683               | [C/T] | SYNONYMOUS-CODING     |
| <i>OsMed5_3</i> | LOC_Os07g48350 | Os_chr07    | 28897554               | [T/A] | SYNONYMOUS-CODING     |
| <i>OsMed5_3</i> | LOC_Os07g48350 | Os_chr07    | 28893769               | [A/C] | SYNONYMOUS-CODING     |
| <i>OsMed6_1</i> | LOC_Os06g11370 | Os_chr06    | 5978629                | [C/T] | INTRON                |
| <i>OsMed6_1</i> | LOC_Os06g11370 | Os_chr06    | 5978556                | [T/C] | INTRON                |
| <i>OsMed6_1</i> | LOC_Os06g11370 | Os_chr06    | 5978470                | [A/G] | INTRON                |
| <i>OsMed6_1</i> | LOC_Os06g11370 | Os_chr06    | 5978446                | [G/A] | INTRON                |
| <i>OsMed6_1</i> | LOC_Os06g11370 | Os_chr06    | 5978419                | [C/A] | INTRON                |
| <i>OsMed6_1</i> | LOC_Os06g11370 | Os_chr06    | 5978393                | [A/T] | INTRON                |
| <i>OsMed6_1</i> | LOC_Os06g11370 | Os_chr06    | 5978375                | [A/G] | INTRON                |

| Mediator genes  | MSU locus ID   | Chromosomes | Physical Position (bp) | SNPs  | Structural Annotation |
|-----------------|----------------|-------------|------------------------|-------|-----------------------|
| <i>OsMed6_1</i> | LOC_Os06g11370 | Os_chr06    | 5977981                | [T/A] | INTRON                |
| <i>OsMed6_1</i> | LOC_Os06g11370 | Os_chr06    | 5977952                | [G/T] | INTRON                |
| <i>OsMed6_1</i> | LOC_Os06g11370 | Os_chr06    | 5977937                | [G/A] | INTRON                |
| <i>OsMed6_1</i> | LOC_Os06g11370 | Os_chr06    | 5977838                | [G/T] | INTRON                |
| <i>OsMed6_1</i> | LOC_Os06g11370 | Os_chr06    | 5977829                | [A/G] | INTRON                |
| <i>OsMed6_1</i> | LOC_Os06g11370 | Os_chr06    | 5977819                | [T/C] | INTRON                |
| <i>OsMed6_1</i> | LOC_Os06g11370 | Os_chr06    | 5977707                | [C/T] | INTRON                |
| <i>OsMed6_1</i> | LOC_Os06g11370 | Os_chr06    | 5977647                | [G/A] | INTRON                |
| <i>OsMed6_1</i> | LOC_Os06g11370 | Os_chr06    | 5977571                | [A/G] | INTRON                |
| <i>OsMed6_1</i> | LOC_Os06g11370 | Os_chr06    | 5977512                | [C/T] | INTRON                |
| <i>OsMed6_1</i> | LOC_Os06g11370 | Os_chr06    | 5976978                | [T/A] | INTRON                |
| <i>OsMed6_1</i> | LOC_Os06g11370 | Os_chr06    | 5976867                | [G/A] | INTRON                |
| <i>OsMed6_1</i> | LOC_Os06g11370 | Os_chr06    | 5976833                | [T/C] | INTRON                |
| <i>OsMed6_1</i> | LOC_Os06g11370 | Os_chr06    | 5979720                | [C/G] | REGULATORY            |
| <i>OsMed6_1</i> | LOC_Os06g11370 | Os_chr06    | 5979696                | [A/G] | REGULATORY            |
| <i>OsMed6_1</i> | LOC_Os06g11370 | Os_chr06    | 5979617                | [G/A] | REGULATORY            |
| <i>OsMed6_1</i> | LOC_Os06g11370 | Os_chr06    | 5976586                | [T/C] | REGULATORY            |
| <i>OsMed6_1</i> | LOC_Os06g11370 | Os_chr06    | 5976441                | [C/A] | REGULATORY            |
| <i>OsMed6_1</i> | LOC_Os06g11370 | Os_chr06    | 5980813                | [A/T] | REGULATORY            |
| <i>OsMed6_1</i> | LOC_Os06g11370 | Os_chr06    | 5980793                | [C/T] | REGULATORY            |
| <i>OsMed6_1</i> | LOC_Os06g11370 | Os_chr06    | 5980790                | [C/T] | REGULATORY            |
| <i>OsMed6_1</i> | LOC_Os06g11370 | Os_chr06    | 5980783                | [G/A] | REGULATORY            |
| <i>OsMed6_1</i> | LOC_Os06g11370 | Os_chr06    | 5980759                | [C/T] | REGULATORY            |
| <i>OsMed6_1</i> | LOC_Os06g11370 | Os_chr06    | 5980737                | [G/A] | REGULATORY            |
| <i>OsMed6_1</i> | LOC_Os06g11370 | Os_chr06    | 5980735                | [T/C] | REGULATORY            |
| <i>OsMed6_1</i> | LOC_Os06g11370 | Os_chr06    | 5980720                | [A/G] | REGULATORY            |
| <i>OsMed6_1</i> | LOC_Os06g11370 | Os_chr06    | 5980705                | [G/A] | REGULATORY            |
| <i>OsMed6_1</i> | LOC_Os06g11370 | Os_chr06    | 5980658                | [T/C] | REGULATORY            |
| <i>OsMed6_1</i> | LOC_Os06g11370 | Os_chr06    | 5980641                | [C/T] | REGULATORY            |
| <i>OsMed6_1</i> | LOC_Os06g11370 | Os_chr06    | 5980637                | [G/A] | REGULATORY            |
| <i>OsMed6_1</i> | LOC_Os06g11370 | Os_chr06    | 5980625                | [A/G] | REGULATORY            |
| <i>OsMed6_1</i> | LOC_Os06g11370 | Os_chr06    | 5980619                | [G/A] | REGULATORY            |
| <i>OsMed6_1</i> | LOC_Os06g11370 | Os_chr06    | 5980590                | [C/T] | REGULATORY            |
| <i>OsMed6_1</i> | LOC_Os06g11370 | Os_chr06    | 5980589                | [G/T] | REGULATORY            |
| <i>OsMed6_1</i> | LOC_Os06g11370 | Os_chr06    | 5980583                | [C/T] | REGULATORY            |
| <i>OsMed6_1</i> | LOC_Os06g11370 | Os_chr06    | 5980577                | [C/T] | REGULATORY            |
| <i>OsMed6_1</i> | LOC_Os06g11370 | Os_chr06    | 5980491                | [G/A] | REGULATORY            |
| <i>OsMed6_1</i> | LOC_Os06g11370 | Os_chr06    | 5980479                | [C/T] | REGULATORY            |
| <i>OsMed6_1</i> | LOC_Os06g11370 | Os_chr06    | 5980382                | [A/G] | REGULATORY            |
| <i>OsMed6_1</i> | LOC_Os06g11370 | Os_chr06    | 5980281                | [G/C] | REGULATORY            |
| <i>OsMed6_1</i> | LOC_Os06g11370 | Os_chr06    | 5980247                | [C/T] | REGULATORY            |
| <i>OsMed6_1</i> | LOC_Os06g11370 | Os_chr06    | 5980244                | [T/G] | REGULATORY            |
| <i>OsMed6_1</i> | LOC_Os06g11370 | Os_chr06    | 5980233                | [G/T] | REGULATORY            |
| <i>OsMed6_1</i> | LOC_Os06g11370 | Os_chr06    | 5980228                | [G/A] | REGULATORY            |
| <i>OsMed6_1</i> | LOC_Os06g11370 | Os_chr06    | 5980213                | [G/T] | REGULATORY            |
| <i>OsMed6_1</i> | LOC_Os06g11370 | Os_chr06    | 5980200                | [C/T] | REGULATORY            |
| <i>OsMed6_1</i> | LOC_Os06g11370 | Os_chr06    | 5980198                | [A/G] | REGULATORY            |



| Mediator genes  | MSU locus ID   | Chromosomes | Physical Position (bp) | SNPs  | Structural Annotation |
|-----------------|----------------|-------------|------------------------|-------|-----------------------|
| <i>OsMed6_1</i> | LOC_Os06g11370 | Os_chr06    | 5980180                | [G/A] | REGULATORY            |
| <i>OsMed6_1</i> | LOC_Os06g11370 | Os_chr06    | 5980148                | [C/T] | REGULATORY            |
| <i>OsMed6_1</i> | LOC_Os06g11370 | Os_chr06    | 5980140                | [A/G] | REGULATORY            |
| <i>OsMed6_1</i> | LOC_Os06g11370 | Os_chr06    | 5980135                | [A/G] | REGULATORY            |
| <i>OsMed6_1</i> | LOC_Os06g11370 | Os_chr06    | 5980092                | [C/T] | REGULATORY            |
| <i>OsMed6_1</i> | LOC_Os06g11370 | Os_chr06    | 5980068                | [C/T] | REGULATORY            |
| <i>OsMed6_1</i> | LOC_Os06g11370 | Os_chr06    | 5980053                | [G/T] | REGULATORY            |
| <i>OsMed6_1</i> | LOC_Os06g11370 | Os_chr06    | 5980046                | [C/T] | REGULATORY            |
| <i>OsMed6_1</i> | LOC_Os06g11370 | Os_chr06    | 5980040                | [C/T] | REGULATORY            |
| <i>OsMed6_1</i> | LOC_Os06g11370 | Os_chr06    | 5980038                | [C/T] | REGULATORY            |
| <i>OsMed6_1</i> | LOC_Os06g11370 | Os_chr06    | 5980031                | [C/T] | REGULATORY            |
| <i>OsMed6_1</i> | LOC_Os06g11370 | Os_chr06    | 5980030                | [G/A] | REGULATORY            |
| <i>OsMed6_1</i> | LOC_Os06g11370 | Os_chr06    | 5980014                | [A/G] | REGULATORY            |
| <i>OsMed6_1</i> | LOC_Os06g11370 | Os_chr06    | 5979977                | [T/C] | REGULATORY            |
| <i>OsMed6_1</i> | LOC_Os06g11370 | Os_chr06    | 5979955                | [T/C] | REGULATORY            |
| <i>OsMed6_1</i> | LOC_Os06g11370 | Os_chr06    | 5979938                | [A/G] | REGULATORY            |
| <i>OsMed6_1</i> | LOC_Os06g11370 | Os_chr06    | 5979937                | [C/T] | REGULATORY            |
| <i>OsMed6_1</i> | LOC_Os06g11370 | Os_chr06    | 5979046                | [G/C] | SYNONYMOUS-CODING     |
| <i>OsMed6_1</i> | LOC_Os06g11370 | Os_chr06    | 5976732                | [T/C] | SYNONYMOUS-CODING     |
| <i>OsMed7_1</i> | LOC_Os04g56640 | Os_chr04    | 33591401               | [G/C] | INTRON                |
| <i>OsMed7_1</i> | LOC_Os04g56640 | Os_chr04    | 33591182               | [C/T] | INTRON                |
| <i>OsMed7_1</i> | LOC_Os04g56640 | Os_chr04    | 33591163               | [T/G] | INTRON                |
| <i>OsMed7_1</i> | LOC_Os04g56640 | Os_chr04    | 33591103               | [A/T] | INTRON                |
| <i>OsMed7_1</i> | LOC_Os04g56646 | Os_chr04    | 33592719               | [C/T] | REGULATORY            |
| <i>OsMed7_1</i> | LOC_Os04g56646 | Os_chr04    | 33592652               | [A/T] | REGULATORY            |
| <i>OsMed7_1</i> | LOC_Os04g56646 | Os_chr04    | 33592476               | [T/G] | REGULATORY            |
| <i>OsMed7_1</i> | LOC_Os04g56646 | Os_chr04    | 33592425               | [G/T] | REGULATORY            |
| <i>OsMed7_1</i> | LOC_Os04g56646 | Os_chr04    | 33592414               | [C/A] | REGULATORY            |
| <i>OsMed7_1</i> | LOC_Os04g56640 | Os_chr04    | 33589347               | [T/C] | REGULATORY            |
| <i>OsMed7_1</i> | LOC_Os04g56640 | Os_chr04    | 33592298               | [G/T] | REGULATORY            |
| <i>OsMed7_1</i> | LOC_Os04g56640 | Os_chr04    | 33590760               | [C/T] | SYNONYMOUS-CODING     |
| <i>OsMed8_1</i> | LOC_Os03g31010 | Os_chr03    | 17672357               | [G/A] | INTRON                |
| <i>OsMed8_1</i> | LOC_Os03g31010 | Os_chr03    | 17671969               | [G/C] | INTRON                |
| <i>OsMed8_1</i> | LOC_Os03g31010 | Os_chr03    | 17671843               | [A/G] | INTRON                |
| <i>OsMed8_1</i> | LOC_Os03g31010 | Os_chr03    | 17671788               | [C/T] | INTRON                |
| <i>OsMed8_1</i> | LOC_Os03g31010 | Os_chr03    | 17671697               | [T/C] | INTRON                |
| <i>OsMed8_1</i> | LOC_Os03g31010 | Os_chr03    | 17671062               | [T/C] | INTRON                |
| <i>OsMed8_1</i> | LOC_Os03g31010 | Os_chr03    | 17671048               | [A/G] | INTRON                |
| <i>OsMed8_1</i> | LOC_Os03g31010 | Os_chr03    | 17670809               | [C/G] | INTRON                |
| <i>OsMed8_1</i> | LOC_Os03g31010 | Os_chr03    | 17670371               | [C/A] | INTRON                |
| <i>OsMed8_1</i> | LOC_Os03g31010 | Os_chr03    | 17670315               | [C/T] | INTRON                |
| <i>OsMed8_1</i> | LOC_Os03g31010 | Os_chr03    | 17670053               | [T/C] | INTRON                |
| <i>OsMed8_1</i> | LOC_Os03g31010 | Os_chr03    | 17669204               | [T/C] | INTRON                |
| <i>OsMed8_1</i> | LOC_Os03g31010 | Os_chr03    | 17669181               | [G/T] | INTRON                |
| <i>OsMed8_1</i> | LOC_Os03g31010 | Os_chr03    | 17669157               | [T/A] | INTRON                |
| <i>OsMed8_1</i> | LOC_Os03g31010 | Os_chr03    | 17669042               | [G/T] | INTRON                |
| <i>OsMed8_1</i> | LOC_Os03g31010 | Os_chr03    | 17668965               | [C/T] | INTRON                |

| Mediator genes  | MSU locus ID   | Chromosomes | Physical Position (bp) | SNPs  | Structural Annotation |
|-----------------|----------------|-------------|------------------------|-------|-----------------------|
| <i>OsMed8_1</i> | LOC_Os03g31010 | Os_chr03    | 17668787               | [G/T] | INTRON                |
| <i>OsMed8_1</i> | LOC_Os03g31010 | Os_chr03    | 17668672               | [G/A] | INTRON                |
| <i>OsMed8_1</i> | LOC_Os03g31010 | Os_chr03    | 17668640               | [C/T] | INTRON                |
| <i>OsMed8_1</i> | LOC_Os03g31010 | Os_chr03    | 17668525               | [A/G] | INTRON                |
| <i>OsMed8_1</i> | LOC_Os03g31010 | Os_chr03    | 17671340               | [C/G] | NON-SYNONYMOUS-CODING |
| <i>OsMed8_1</i> | LOC_Os03g31010 | Os_chr03    | 17671302               | [G/A] | NON-SYNONYMOUS-CODING |
| <i>OsMed8_1</i> | LOC_Os03g31010 | Os_chr03    | 17670760               | [G/T] | NON-SYNONYMOUS-CODING |
| <i>OsMed8_1</i> | LOC_Os03g31010 | Os_chr03    | 17672861               | [C/T] | REGULATORY            |
| <i>OsMed8_1</i> | LOC_Os03g31010 | Os_chr03    | 17672854               | [A/G] | REGULATORY            |
| <i>OsMed8_1</i> | LOC_Os03g31010 | Os_chr03    | 17672830               | [C/T] | REGULATORY            |
| <i>OsMed8_1</i> | LOC_Os03g31010 | Os_chr03    | 17672787               | [T/C] | REGULATORY            |
| <i>OsMed8_1</i> | LOC_Os03g31010 | Os_chr03    | 17672612               | [C/T] | REGULATORY            |
| <i>OsMed8_1</i> | LOC_Os03g31010 | Os_chr03    | 17667895               | [C/T] | REGULATORY            |
| <i>OsMed8_1</i> | LOC_Os03g31010 | Os_chr03    | 17667706               | [T/C] | REGULATORY            |
| <i>OsMed8_1</i> | LOC_Os03g31010 | Os_chr03    | 17667701               | [C/G] | REGULATORY            |
| <i>OsMed8_1</i> | LOC_Os03g31010 | Os_chr03    | 17667686               | [A/G] | REGULATORY            |
| <i>OsMed8_1</i> | LOC_Os03g31010 | Os_chr03    | 17667660               | [G/A] | REGULATORY            |
| <i>OsMed8_1</i> | LOC_Os03g31010 | Os_chr03    | 17667657               | [C/T] | REGULATORY            |
| <i>OsMed8_1</i> | LOC_Os03g31010 | Os_chr03    | 17667652               | [T/C] | REGULATORY            |
| <i>OsMed8_1</i> | LOC_Os03g31010 | Os_chr03    | 17667612               | [G/A] | REGULATORY            |
| <i>OsMed8_1</i> | LOC_Os03g31010 | Os_chr03    | 17667606               | [G/A] | REGULATORY            |
| <i>OsMed8_1</i> | LOC_Os03g31010 | Os_chr03    | 17667560               | [A/G] | REGULATORY            |
| <i>OsMed8_1</i> | LOC_Os03g31010 | Os_chr03    | 17667544               | [T/A] | REGULATORY            |
| <i>OsMed8_1</i> | LOC_Os03g31010 | Os_chr03    | 17667270               | [C/T] | REGULATORY            |
| <i>OsMed8_1</i> | LOC_Os03g31010 | Os_chr03    | 17667235               | [T/A] | REGULATORY            |
| <i>OsMed8_1</i> | LOC_Os03g31010 | Os_chr03    | 17667135               | [A/T] | REGULATORY            |
| <i>OsMed8_1</i> | LOC_Os03g31010 | Os_chr03    | 17667081               | [C/A] | REGULATORY            |
| <i>OsMed8_1</i> | LOC_Os03g31010 | Os_chr03    | 17672562               | [A/G] | SYNONYMOUS-CODING     |
| <i>OsMed8_1</i> | LOC_Os03g31010 | Os_chr03    | 17672529               | [C/T] | SYNONYMOUS-CODING     |
| <i>OsMed8_1</i> | LOC_Os03g31010 | Os_chr03    | 17671532               | [A/G] | SYNONYMOUS-CODING     |
| <i>OsMed9_1</i> | LOC_Os01g31629 | Os_chr01    | 17324113               | [T/A] | INTRON                |
| <i>OsMed9_1</i> | LOC_Os01g31629 | Os_chr01    | 17324002               | [T/C] | INTRON                |
| <i>OsMed9_1</i> | LOC_Os01g31629 | Os_chr01    | 17323987               | [A/T] | INTRON                |
| <i>OsMed9_1</i> | LOC_Os01g31629 | Os_chr01    | 17323828               | [A/C] | INTRON                |
| <i>OsMed9_1</i> | LOC_Os01g31629 | Os_chr01    | 17323749               | [C/T] | INTRON                |
| <i>OsMed9_1</i> | LOC_Os01g31629 | Os_chr01    | 17323687               | [C/T] | INTRON                |
| <i>OsMed9_1</i> | LOC_Os01g31629 | Os_chr01    | 17323591               | [G/A] | INTRON                |
| <i>OsMed9_1</i> | LOC_Os01g31629 | Os_chr01    | 17323572               | [G/A] | INTRON                |
| <i>OsMed9_1</i> | LOC_Os01g31629 | Os_chr01    | 17323282               | [C/G] | INTRON                |
| <i>OsMed9_1</i> | LOC_Os01g31629 | Os_chr01    | 17323176               | [C/T] | INTRON                |
| <i>OsMed9_1</i> | LOC_Os01g31629 | Os_chr01    | 17323111               | [G/T] | INTRON                |
| <i>OsMed9_1</i> | LOC_Os01g31629 | Os_chr01    | 17322951               | [C/T] | INTRON                |
| <i>OsMed9_1</i> | LOC_Os01g31629 | Os_chr01    | 17322898               | [C/T] | INTRON                |
| <i>OsMed9_1</i> | LOC_Os01g31629 | Os_chr01    | 17322893               | [C/T] | INTRON                |
| <i>OsMed9_1</i> | LOC_Os01g31629 | Os_chr01    | 17322842               | [T/G] | INTRON                |
| <i>OsMed9_1</i> | LOC_Os01g31629 | Os_chr01    | 17322429               | [G/C] | INTRON                |
| <i>OsMed9_1</i> | LOC_Os01g31629 | Os_chr01    | 17322364               | [G/C] | INTRON                |

| Mediator genes  | MSU locus ID   | Chromosomes | Physical Position (bp) | SNPs  | Structural Annotation |
|-----------------|----------------|-------------|------------------------|-------|-----------------------|
| <i>OsMed9_1</i> | LOC_Os01g31629 | Os_chr01    | 17322336               | [A/C] | INTRON                |
| <i>OsMed9_1</i> | LOC_Os01g31629 | Os_chr01    | 17322144               | [G/A] | INTRON                |
| <i>OsMed9_1</i> | LOC_Os01g31629 | Os_chr01    | 17322125               | [A/G] | INTRON                |
| <i>OsMed9_1</i> | LOC_Os01g31629 | Os_chr01    | 17322055               | [T/A] | INTRON                |
| <i>OsMed9_1</i> | LOC_Os01g31629 | Os_chr01    | 17321972               | [T/C] | INTRON                |
| <i>OsMed9_1</i> | LOC_Os01g31629 | Os_chr01    | 17321965               | [G/A] | INTRON                |
| <i>OsMed9_1</i> | LOC_Os01g31629 | Os_chr01    | 17321955               | [C/A] | INTRON                |
| <i>OsMed9_1</i> | LOC_Os01g31629 | Os_chr01    | 17321496               | [A/G] | INTRON                |
| <i>OsMed9_1</i> | LOC_Os01g31629 | Os_chr01    | 17321444               | [G/A] | INTRON                |
| <i>OsMed9_1</i> | LOC_Os01g31629 | Os_chr01    | 17321365               | [G/A] | INTRON                |
| <i>OsMed9_1</i> | LOC_Os01g31629 | Os_chr01    | 17321346               | [G/T] | INTRON                |
| <i>OsMed9_1</i> | LOC_Os01g31629 | Os_chr01    | 17321344               | [G/A] | INTRON                |
| <i>OsMed9_1</i> | LOC_Os01g31629 | Os_chr01    | 17321076               | [C/T] | INTRON                |
| <i>OsMed9_1</i> | LOC_Os01g31629 | Os_chr01    | 17321072               | [C/G] | INTRON                |
| <i>OsMed9_1</i> | LOC_Os01g31629 | Os_chr01    | 17321060               | [T/G] | INTRON                |
| <i>OsMed9_1</i> | LOC_Os01g31629 | Os_chr01    | 17320816               | [A/T] | INTRON                |
| <i>OsMed9_1</i> | LOC_Os01g31629 | Os_chr01    | 17320784               | [G/A] | INTRON                |
| <i>OsMed9_1</i> | LOC_Os01g31629 | Os_chr01    | 17320769               | [C/G] | INTRON                |
| <i>OsMed9_1</i> | LOC_Os01g31629 | Os_chr01    | 17320707               | [G/A] | INTRON                |
| <i>OsMed9_1</i> | LOC_Os01g31629 | Os_chr01    | 17320620               | [C/T] | INTRON                |
| <i>OsMed9_1</i> | LOC_Os01g31629 | Os_chr01    | 17320524               | [G/A] | INTRON                |
| <i>OsMed9_1</i> | LOC_Os01g31629 | Os_chr01    | 17320351               | [C/T] | INTRON                |
| <i>OsMed9_1</i> | LOC_Os01g31629 | Os_chr01    | 17320153               | [T/A] | INTRON                |
| <i>OsMed9_1</i> | LOC_Os01g31629 | Os_chr01    | 17320101               | [G/A] | INTRON                |
| <i>OsMed9_1</i> | LOC_Os01g31629 | Os_chr01    | 17319639               | [A/G] | INTRON                |
| <i>OsMed9_1</i> | LOC_Os01g31629 | Os_chr01    | 17319566               | [T/G] | INTRON                |
| <i>OsMed9_1</i> | LOC_Os01g31629 | Os_chr01    | 17319561               | [T/C] | INTRON                |
| <i>OsMed9_1</i> | LOC_Os01g31629 | Os_chr01    | 17319543               | [G/A] | INTRON                |
| <i>OsMed9_1</i> | LOC_Os01g31629 | Os_chr01    | 17319345               | [G/A] | INTRON                |
| <i>OsMed9_1</i> | LOC_Os01g31629 | Os_chr01    | 17319341               | [T/C] | INTRON                |
| <i>OsMed9_1</i> | LOC_Os01g31629 | Os_chr01    | 17319242               | [G/A] | INTRON                |
| <i>OsMed9_1</i> | LOC_Os01g31629 | Os_chr01    | 17319003               | [A/T] | INTRON                |
| <i>OsMed9_1</i> | LOC_Os01g31629 | Os_chr01    | 17318905               | [T/C] | INTRON                |
| <i>OsMed9_1</i> | LOC_Os01g31629 | Os_chr01    | 17318881               | [C/G] | INTRON                |
| <i>OsMed9_1</i> | LOC_Os01g31629 | Os_chr01    | 17318591               | [C/T] | INTRON                |
| <i>OsMed9_1</i> | LOC_Os01g31629 | Os_chr01    | 17318581               | [C/T] | INTRON                |
| <i>OsMed9_1</i> | LOC_Os01g31629 | Os_chr01    | 17318421               | [C/T] | INTRON                |
| <i>OsMed9_1</i> | LOC_Os01g31629 | Os_chr01    | 17318332               | [C/T] | INTRON                |
| <i>OsMed9_1</i> | LOC_Os01g31629 | Os_chr01    | 17318317               | [G/A] | INTRON                |
| <i>OsMed9_1</i> | LOC_Os01g31629 | Os_chr01    | 17318310               | [A/G] | INTRON                |
| <i>OsMed9_1</i> | LOC_Os01g31629 | Os_chr01    | 17318217               | [C/T] | INTRON                |
| <i>OsMed9_1</i> | LOC_Os01g31629 | Os_chr01    | 17317839               | [G/A] | INTRON                |
| <i>OsMed9_1</i> | LOC_Os01g31629 | Os_chr01    | 17317830               | [C/T] | INTRON                |
| <i>OsMed9_1</i> | LOC_Os01g31629 | Os_chr01    | 17317824               | [A/G] | INTRON                |
| <i>OsMed9_1</i> | LOC_Os01g31629 | Os_chr01    | 17317817               | [T/G] | INTRON                |
| <i>OsMed9_1</i> | LOC_Os01g31629 | Os_chr01    | 17317796               | [C/T] | INTRON                |
| <i>OsMed9_1</i> | LOC_Os01g31629 | Os_chr01    | 17317786               | [G/T] | INTRON                |

| Mediator genes  | MSU locus ID   | Chromosomes | Physical Position (bp) | SNPs  | Structural Annotation |
|-----------------|----------------|-------------|------------------------|-------|-----------------------|
| <i>OsMed9_1</i> | LOC_Os01g31629 | Os_chr01    | 17317757               | [G/A] | INTRON                |
| <i>OsMed9_1</i> | LOC_Os01g31629 | Os_chr01    | 17317747               | [G/T] | INTRON                |
| <i>OsMed9_1</i> | LOC_Os01g31629 | Os_chr01    | 17317722               | [A/G] | INTRON                |
| <i>OsMed9_1</i> | LOC_Os01g31629 | Os_chr01    | 17317605               | [A/G] | INTRON                |
| <i>OsMed9_1</i> | LOC_Os01g31629 | Os_chr01    | 17317559               | [G/T] | INTRON                |
| <i>OsMed9_1</i> | LOC_Os01g31629 | Os_chr01    | 17317554               | [G/T] | INTRON                |
| <i>OsMed9_1</i> | LOC_Os01g31629 | Os_chr01    | 17317550               | [G/A] | INTRON                |
| <i>OsMed9_1</i> | LOC_Os01g31629 | Os_chr01    | 17317547               | [G/A] | INTRON                |
| <i>OsMed9_1</i> | LOC_Os01g31629 | Os_chr01    | 17317524               | [G/A] | INTRON                |
| <i>OsMed9_1</i> | LOC_Os01g31629 | Os_chr01    | 17317463               | [G/A] | INTRON                |
| <i>OsMed9_1</i> | LOC_Os01g31629 | Os_chr01    | 17317455               | [G/A] | INTRON                |
| <i>OsMed9_1</i> | LOC_Os01g31629 | Os_chr01    | 17317437               | [C/T] | INTRON                |
| <i>OsMed9_1</i> | LOC_Os01g31629 | Os_chr01    | 17317383               | [G/A] | INTRON                |
| <i>OsMed9_1</i> | LOC_Os01g31629 | Os_chr01    | 17317376               | [T/C] | INTRON                |
| <i>OsMed9_1</i> | LOC_Os01g31629 | Os_chr01    | 17317341               | [T/C] | INTRON                |
| <i>OsMed9_1</i> | LOC_Os01g31629 | Os_chr01    | 17317243               | [T/C] | INTRON                |
| <i>OsMed9_1</i> | LOC_Os01g31629 | Os_chr01    | 17317227               | [G/T] | INTRON                |
| <i>OsMed9_1</i> | LOC_Os01g31629 | Os_chr01    | 17317144               | [G/A] | INTRON                |
| <i>OsMed9_1</i> | LOC_Os01g31629 | Os_chr01    | 17317142               | [C/T] | INTRON                |
| <i>OsMed9_1</i> | LOC_Os01g31629 | Os_chr01    | 17317139               | [C/T] | INTRON                |
| <i>OsMed9_1</i> | LOC_Os01g31629 | Os_chr01    | 17317113               | [A/G] | INTRON                |
| <i>OsMed9_1</i> | LOC_Os01g31629 | Os_chr01    | 17317108               | [A/G] | INTRON                |
| <i>OsMed9_1</i> | LOC_Os01g31629 | Os_chr01    | 17317101               | [C/A] | INTRON                |
| <i>OsMed9_1</i> | LOC_Os01g31629 | Os_chr01    | 17317080               | [G/A] | INTRON                |
| <i>OsMed9_1</i> | LOC_Os01g31629 | Os_chr01    | 17317069               | [G/A] | INTRON                |
| <i>OsMed9_1</i> | LOC_Os01g31629 | Os_chr01    | 17317053               | [G/A] | INTRON                |
| <i>OsMed9_1</i> | LOC_Os01g31629 | Os_chr01    | 17317033               | [G/A] | INTRON                |
| <i>OsMed9_1</i> | LOC_Os01g31629 | Os_chr01    | 17317031               | [C/T] | INTRON                |
| <i>OsMed9_1</i> | LOC_Os01g31629 | Os_chr01    | 17317022               | [C/T] | INTRON                |
| <i>OsMed9_1</i> | LOC_Os01g31629 | Os_chr01    | 17316950               | [G/A] | INTRON                |
| <i>OsMed9_1</i> | LOC_Os01g31629 | Os_chr01    | 17316944               | [C/T] | INTRON                |
| <i>OsMed9_1</i> | LOC_Os01g31629 | Os_chr01    | 17316804               | [C/T] | INTRON                |
| <i>OsMed9_1</i> | LOC_Os01g31629 | Os_chr01    | 17316778               | [G/C] | INTRON                |
| <i>OsMed9_1</i> | LOC_Os01g31629 | Os_chr01    | 17316742               | [G/A] | INTRON                |
| <i>OsMed9_1</i> | LOC_Os01g31629 | Os_chr01    | 17316679               | [G/A] | INTRON                |
| <i>OsMed9_1</i> | LOC_Os01g31629 | Os_chr01    | 17316638               | [C/T] | INTRON                |
| <i>OsMed9_1</i> | LOC_Os01g31629 | Os_chr01    | 17316634               | [G/A] | INTRON                |
| <i>OsMed9_1</i> | LOC_Os01g31629 | Os_chr01    | 17316626               | [C/T] | INTRON                |
| <i>OsMed9_1</i> | LOC_Os01g31629 | Os_chr01    | 17316571               | [G/A] | INTRON                |
| <i>OsMed9_1</i> | LOC_Os01g31629 | Os_chr01    | 17316464               | [C/T] | INTRON                |
| <i>OsMed9_1</i> | LOC_Os01g31629 | Os_chr01    | 17316410               | [G/A] | INTRON                |
| <i>OsMed9_1</i> | LOC_Os01g31629 | Os_chr01    | 17316397               | [G/A] | INTRON                |
| <i>OsMed9_1</i> | LOC_Os01g31629 | Os_chr01    | 17316388               | [C/A] | INTRON                |
| <i>OsMed9_1</i> | LOC_Os01g31629 | Os_chr01    | 17316338               | [A/G] | INTRON                |
| <i>OsMed9_1</i> | LOC_Os01g31629 | Os_chr01    | 17316297               | [A/G] | INTRON                |
| <i>OsMed9_1</i> | LOC_Os01g31629 | Os_chr01    | 17316267               | [A/G] | INTRON                |
| <i>OsMed9_1</i> | LOC_Os01g31629 | Os_chr01    | 17316230               | [C/T] | INTRON                |

| Mediator genes  | MSU locus ID   | Chromosomes | Physical Position (bp) | SNPs  | Structural Annotation |
|-----------------|----------------|-------------|------------------------|-------|-----------------------|
| <i>OsMed9_1</i> | LOC_Os01g31629 | Os_chr01    | 17316228               | [T/C] | INTRON                |
| <i>OsMed9_1</i> | LOC_Os01g31629 | Os_chr01    | 17316198               | [C/T] | INTRON                |
| <i>OsMed9_1</i> | LOC_Os01g31629 | Os_chr01    | 17316085               | [A/C] | INTRON                |
| <i>OsMed9_1</i> | LOC_Os01g31629 | Os_chr01    | 17315940               | [T/C] | INTRON                |
| <i>OsMed9_1</i> | LOC_Os01g31629 | Os_chr01    | 17315907               | [G/A] | INTRON                |
| <i>OsMed9_1</i> | LOC_Os01g31629 | Os_chr01    | 17315879               | [C/T] | INTRON                |
| <i>OsMed9_1</i> | LOC_Os01g31629 | Os_chr01    | 17315802               | [G/A] | INTRON                |
| <i>OsMed9_1</i> | LOC_Os01g31629 | Os_chr01    | 17315778               | [C/T] | INTRON                |
| <i>OsMed9_1</i> | LOC_Os01g31629 | Os_chr01    | 17315612               | [G/A] | INTRON                |
| <i>OsMed9_1</i> | LOC_Os01g31629 | Os_chr01    | 17315443               | [C/T] | INTRON                |
| <i>OsMed9_1</i> | LOC_Os01g31629 | Os_chr01    | 17315440               | [C/T] | INTRON                |
| <i>OsMed9_1</i> | LOC_Os01g31629 | Os_chr01    | 17315429               | [C/A] | INTRON                |
| <i>OsMed9_1</i> | LOC_Os01g31629 | Os_chr01    | 17315428               | [T/A] | INTRON                |
| <i>OsMed9_1</i> | LOC_Os01g31629 | Os_chr01    | 17315422               | [C/T] | INTRON                |
| <i>OsMed9_1</i> | LOC_Os01g31629 | Os_chr01    | 17315415               | [G/A] | INTRON                |
| <i>OsMed9_1</i> | LOC_Os01g31629 | Os_chr01    | 17315278               | [G/A] | INTRON                |
| <i>OsMed9_1</i> | LOC_Os01g31629 | Os_chr01    | 17315214               | [G/A] | INTRON                |
| <i>OsMed9_1</i> | LOC_Os01g31629 | Os_chr01    | 17315172               | [G/A] | INTRON                |
| <i>OsMed9_1</i> | LOC_Os01g31629 | Os_chr01    | 17315155               | [G/A] | INTRON                |
| <i>OsMed9_1</i> | LOC_Os01g31629 | Os_chr01    | 17315127               | [G/A] | INTRON                |
| <i>OsMed9_1</i> | LOC_Os01g31629 | Os_chr01    | 17315087               | [C/T] | INTRON                |
| <i>OsMed9_1</i> | LOC_Os01g31629 | Os_chr01    | 17315056               | [C/T] | INTRON                |
| <i>OsMed9_1</i> | LOC_Os01g31629 | Os_chr01    | 17315012               | [G/A] | INTRON                |
| <i>OsMed9_1</i> | LOC_Os01g31629 | Os_chr01    | 17314994               | [G/A] | INTRON                |
| <i>OsMed9_1</i> | LOC_Os01g31629 | Os_chr01    | 17314979               | [G/A] | INTRON                |
| <i>OsMed9_1</i> | LOC_Os01g31629 | Os_chr01    | 17314934               | [G/A] | INTRON                |
| <i>OsMed9_1</i> | LOC_Os01g31629 | Os_chr01    | 17314915               | [A/C] | INTRON                |
| <i>OsMed9_1</i> | LOC_Os01g31629 | Os_chr01    | 17314863               | [G/A] | INTRON                |
| <i>OsMed9_1</i> | LOC_Os01g31629 | Os_chr01    | 17314769               | [G/A] | INTRON                |
| <i>OsMed9_1</i> | LOC_Os01g31629 | Os_chr01    | 17314750               | [G/A] | INTRON                |
| <i>OsMed9_1</i> | LOC_Os01g31629 | Os_chr01    | 17314715               | [T/C] | INTRON                |
| <i>OsMed9_1</i> | LOC_Os01g31629 | Os_chr01    | 17314704               | [C/T] | INTRON                |
| <i>OsMed9_1</i> | LOC_Os01g31629 | Os_chr01    | 17314570               | [G/A] | INTRON                |
| <i>OsMed9_1</i> | LOC_Os01g31629 | Os_chr01    | 17314560               | [T/C] | INTRON                |
| <i>OsMed9_1</i> | LOC_Os01g31629 | Os_chr01    | 17314547               | [G/A] | INTRON                |
| <i>OsMed9_1</i> | LOC_Os01g31629 | Os_chr01    | 17314529               | [T/A] | INTRON                |
| <i>OsMed9_1</i> | LOC_Os01g31629 | Os_chr01    | 17314511               | [G/A] | INTRON                |
| <i>OsMed9_1</i> | LOC_Os01g31629 | Os_chr01    | 17314478               | [C/A] | INTRON                |
| <i>OsMed9_1</i> | LOC_Os01g31629 | Os_chr01    | 17314473               | [C/T] | INTRON                |
| <i>OsMed9_1</i> | LOC_Os01g31629 | Os_chr01    | 17314444               | [G/A] | INTRON                |
| <i>OsMed9_1</i> | LOC_Os01g31629 | Os_chr01    | 17314431               | [C/T] | INTRON                |
| <i>OsMed9_1</i> | LOC_Os01g31629 | Os_chr01    | 17314416               | [A/G] | INTRON                |
| <i>OsMed9_1</i> | LOC_Os01g31629 | Os_chr01    | 17314409               | [C/T] | INTRON                |
| <i>OsMed9_1</i> | LOC_Os01g31629 | Os_chr01    | 17314381               | [G/A] | INTRON                |
| <i>OsMed9_1</i> | LOC_Os01g31629 | Os_chr01    | 17314377               | [C/T] | INTRON                |
| <i>OsMed9_1</i> | LOC_Os01g31629 | Os_chr01    | 17314297               | [G/A] | INTRON                |
| <i>OsMed9_1</i> | LOC_Os01g31629 | Os_chr01    | 17314269               | [G/A] | INTRON                |

| Mediator genes  | MSU locus ID   | Chromosomes | Physical Position (bp) | SNPs  | Structural Annotation |
|-----------------|----------------|-------------|------------------------|-------|-----------------------|
| <i>OsMed9_1</i> | LOC_Os01g31629 | Os_chr01    | 17314230               | [G/A] | INTRON                |
| <i>OsMed9_1</i> | LOC_Os01g31629 | Os_chr01    | 17314228               | [C/T] | INTRON                |
| <i>OsMed9_1</i> | LOC_Os01g31629 | Os_chr01    | 17314216               | [C/T] | INTRON                |
| <i>OsMed9_1</i> | LOC_Os01g31629 | Os_chr01    | 17314206               | [G/A] | INTRON                |
| <i>OsMed9_1</i> | LOC_Os01g31629 | Os_chr01    | 17314190               | [T/A] | INTRON                |
| <i>OsMed9_1</i> | LOC_Os01g31629 | Os_chr01    | 17314150               | [A/G] | INTRON                |
| <i>OsMed9_1</i> | LOC_Os01g31629 | Os_chr01    | 17314125               | [C/T] | INTRON                |
| <i>OsMed9_1</i> | LOC_Os01g31629 | Os_chr01    | 17314031               | [G/A] | INTRON                |
| <i>OsMed9_1</i> | LOC_Os01g31629 | Os_chr01    | 17314010               | [G/A] | INTRON                |
| <i>OsMed9_1</i> | LOC_Os01g31629 | Os_chr01    | 17313973               | [G/A] | INTRON                |
| <i>OsMed9_1</i> | LOC_Os01g31629 | Os_chr01    | 17313959               | [G/A] | INTRON                |
| <i>OsMed9_1</i> | LOC_Os01g31629 | Os_chr01    | 17313952               | [G/A] | INTRON                |
| <i>OsMed9_1</i> | LOC_Os01g31629 | Os_chr01    | 17313912               | [G/A] | INTRON                |
| <i>OsMed9_1</i> | LOC_Os01g31629 | Os_chr01    | 17313900               | [T/C] | INTRON                |
| <i>OsMed9_1</i> | LOC_Os01g31629 | Os_chr01    | 17313870               | [T/C] | INTRON                |
| <i>OsMed9_1</i> | LOC_Os01g31629 | Os_chr01    | 17313863               | [G/A] | INTRON                |
| <i>OsMed9_1</i> | LOC_Os01g31629 | Os_chr01    | 17313814               | [G/A] | INTRON                |
| <i>OsMed9_1</i> | LOC_Os01g31629 | Os_chr01    | 17313796               | [C/T] | INTRON                |
| <i>OsMed9_1</i> | LOC_Os01g31629 | Os_chr01    | 17313787               | [G/A] | INTRON                |
| <i>OsMed9_1</i> | LOC_Os01g31629 | Os_chr01    | 17313757               | [G/A] | INTRON                |
| <i>OsMed9_1</i> | LOC_Os01g31629 | Os_chr01    | 17313719               | [C/T] | INTRON                |
| <i>OsMed9_1</i> | LOC_Os01g31629 | Os_chr01    | 17313703               | [G/A] | INTRON                |
| <i>OsMed9_1</i> | LOC_Os01g31629 | Os_chr01    | 17313694               | [G/A] | INTRON                |
| <i>OsMed9_1</i> | LOC_Os01g31629 | Os_chr01    | 17313620               | [C/T] | INTRON                |
| <i>OsMed9_1</i> | LOC_Os01g31629 | Os_chr01    | 17313518               | [C/T] | INTRON                |
| <i>OsMed9_1</i> | LOC_Os01g31629 | Os_chr01    | 17313415               | [T/C] | INTRON                |
| <i>OsMed9_1</i> | LOC_Os01g31629 | Os_chr01    | 17313373               | [C/A] | INTRON                |
| <i>OsMed9_1</i> | LOC_Os01g31629 | Os_chr01    | 17313365               | [T/C] | INTRON                |
| <i>OsMed9_1</i> | LOC_Os01g31629 | Os_chr01    | 17313360               | [G/T] | INTRON                |
| <i>OsMed9_1</i> | LOC_Os01g31629 | Os_chr01    | 17313347               | [A/G] | INTRON                |
| <i>OsMed9_1</i> | LOC_Os01g31629 | Os_chr01    | 17313345               | [C/T] | INTRON                |
| <i>OsMed9_1</i> | LOC_Os01g31629 | Os_chr01    | 17313337               | [A/G] | INTRON                |
| <i>OsMed9_1</i> | LOC_Os01g31629 | Os_chr01    | 17313321               | [T/C] | INTRON                |
| <i>OsMed9_1</i> | LOC_Os01g31629 | Os_chr01    | 17313316               | [T/G] | INTRON                |
| <i>OsMed9_1</i> | LOC_Os01g31629 | Os_chr01    | 17313303               | [G/A] | INTRON                |
| <i>OsMed9_1</i> | LOC_Os01g31629 | Os_chr01    | 17313288               | [C/T] | INTRON                |
| <i>OsMed9_1</i> | LOC_Os01g31629 | Os_chr01    | 17313138               | [G/A] | INTRON                |
| <i>OsMed9_1</i> | LOC_Os01g31629 | Os_chr01    | 17313021               | [C/T] | INTRON                |
| <i>OsMed9_1</i> | LOC_Os01g31629 | Os_chr01    | 17313004               | [G/A] | INTRON                |
| <i>OsMed9_1</i> | LOC_Os01g31629 | Os_chr01    | 17312999               | [A/G] | INTRON                |
| <i>OsMed9_1</i> | LOC_Os01g31629 | Os_chr01    | 17312975               | [G/A] | INTRON                |
| <i>OsMed9_1</i> | LOC_Os01g31629 | Os_chr01    | 17312934               | [G/A] | INTRON                |
| <i>OsMed9_1</i> | LOC_Os01g31629 | Os_chr01    | 17312932               | [A/G] | INTRON                |
| <i>OsMed9_1</i> | LOC_Os01g31629 | Os_chr01    | 17312919               | [G/A] | INTRON                |
| <i>OsMed9_1</i> | LOC_Os01g31629 | Os_chr01    | 17312855               | [A/T] | INTRON                |
| <i>OsMed9_1</i> | LOC_Os01g31629 | Os_chr01    | 17312732               | [C/T] | INTRON                |
| <i>OsMed9_1</i> | LOC_Os01g31629 | Os_chr01    | 17312686               | [G/A] | INTRON                |

| Mediator genes  | MSU locus ID   | Chromosomes | Physical Position (bp) | SNPs  | Structural Annotation |
|-----------------|----------------|-------------|------------------------|-------|-----------------------|
| <i>OsMed9_1</i> | LOC_Os01g31629 | Os_chr01    | 17312634               | [C/T] | INTRON                |
| <i>OsMed9_1</i> | LOC_Os01g31629 | Os_chr01    | 17312625               | [T/A] | INTRON                |
| <i>OsMed9_1</i> | LOC_Os01g31629 | Os_chr01    | 17312617               | [C/T] | INTRON                |
| <i>OsMed9_1</i> | LOC_Os01g31629 | Os_chr01    | 17312591               | [T/A] | INTRON                |
| <i>OsMed9_1</i> | LOC_Os01g31629 | Os_chr01    | 17312586               | [G/A] | INTRON                |
| <i>OsMed9_1</i> | LOC_Os01g31629 | Os_chr01    | 17312531               | [C/T] | INTRON                |
| <i>OsMed9_1</i> | LOC_Os01g31629 | Os_chr01    | 17312523               | [C/T] | INTRON                |
| <i>OsMed9_1</i> | LOC_Os01g31629 | Os_chr01    | 17312513               | [C/T] | INTRON                |
| <i>OsMed9_1</i> | LOC_Os01g31629 | Os_chr01    | 17312508               | [A/G] | INTRON                |
| <i>OsMed9_1</i> | LOC_Os01g31629 | Os_chr01    | 17312460               | [T/C] | INTRON                |
| <i>OsMed9_1</i> | LOC_Os01g31629 | Os_chr01    | 17312401               | [G/C] | INTRON                |
| <i>OsMed9_1</i> | LOC_Os01g31629 | Os_chr01    | 17312380               | [G/A] | INTRON                |
| <i>OsMed9_1</i> | LOC_Os01g31629 | Os_chr01    | 17312371               | [G/A] | INTRON                |
| <i>OsMed9_1</i> | LOC_Os01g31629 | Os_chr01    | 17312366               | [G/A] | INTRON                |
| <i>OsMed9_1</i> | LOC_Os01g31629 | Os_chr01    | 17312349               | [C/A] | INTRON                |
| <i>OsMed9_1</i> | LOC_Os01g31629 | Os_chr01    | 17312287               | [C/T] | INTRON                |
| <i>OsMed9_1</i> | LOC_Os01g31629 | Os_chr01    | 17312281               | [A/C] | INTRON                |
| <i>OsMed9_1</i> | LOC_Os01g31629 | Os_chr01    | 17312245               | [C/T] | INTRON                |
| <i>OsMed9_1</i> | LOC_Os01g31629 | Os_chr01    | 17312228               | [C/T] | INTRON                |
| <i>OsMed9_1</i> | LOC_Os01g31629 | Os_chr01    | 17312211               | [A/C] | INTRON                |
| <i>OsMed9_1</i> | LOC_Os01g31629 | Os_chr01    | 17312200               | [G/A] | INTRON                |
| <i>OsMed9_1</i> | LOC_Os01g31629 | Os_chr01    | 17312147               | [T/A] | INTRON                |
| <i>OsMed9_1</i> | LOC_Os01g31629 | Os_chr01    | 17312077               | [T/G] | INTRON                |
| <i>OsMed9_1</i> | LOC_Os01g31629 | Os_chr01    | 17312066               | [C/T] | INTRON                |
| <i>OsMed9_1</i> | LOC_Os01g31629 | Os_chr01    | 17312013               | [G/A] | INTRON                |
| <i>OsMed9_1</i> | LOC_Os01g31629 | Os_chr01    | 17311994               | [C/T] | INTRON                |
| <i>OsMed9_1</i> | LOC_Os01g31629 | Os_chr01    | 17311942               | [T/C] | INTRON                |
| <i>OsMed9_1</i> | LOC_Os01g31629 | Os_chr01    | 17311927               | [G/A] | INTRON                |
| <i>OsMed9_1</i> | LOC_Os01g31629 | Os_chr01    | 17311925               | [G/A] | INTRON                |
| <i>OsMed9_1</i> | LOC_Os01g31629 | Os_chr01    | 17311835               | [C/G] | INTRON                |
| <i>OsMed9_1</i> | LOC_Os01g31629 | Os_chr01    | 17311803               | [G/A] | INTRON                |
| <i>OsMed9_1</i> | LOC_Os01g31629 | Os_chr01    | 17311776               | [C/T] | INTRON                |
| <i>OsMed9_1</i> | LOC_Os01g31629 | Os_chr01    | 17311760               | [G/T] | INTRON                |
| <i>OsMed9_1</i> | LOC_Os01g31629 | Os_chr01    | 17311717               | [T/C] | INTRON                |
| <i>OsMed9_1</i> | LOC_Os01g31629 | Os_chr01    | 17311700               | [C/A] | INTRON                |
| <i>OsMed9_1</i> | LOC_Os01g31629 | Os_chr01    | 17311686               | [G/A] | INTRON                |
| <i>OsMed9_1</i> | LOC_Os01g31629 | Os_chr01    | 17311603               | [T/A] | INTRON                |
| <i>OsMed9_1</i> | LOC_Os01g31629 | Os_chr01    | 17311596               | [C/T] | INTRON                |
| <i>OsMed9_1</i> | LOC_Os01g31629 | Os_chr01    | 17311580               | [C/T] | INTRON                |
| <i>OsMed9_1</i> | LOC_Os01g31629 | Os_chr01    | 17311530               | [G/A] | INTRON                |
| <i>OsMed9_1</i> | LOC_Os01g31629 | Os_chr01    | 17311517               | [C/T] | INTRON                |
| <i>OsMed9_1</i> | LOC_Os01g31629 | Os_chr01    | 17311510               | [C/T] | INTRON                |
| <i>OsMed9_1</i> | LOC_Os01g31629 | Os_chr01    | 17311494               | [G/C] | INTRON                |
| <i>OsMed9_1</i> | LOC_Os01g31629 | Os_chr01    | 17311458               | [T/C] | INTRON                |
| <i>OsMed9_1</i> | LOC_Os01g31629 | Os_chr01    | 17311411               | [A/C] | INTRON                |
| <i>OsMed9_1</i> | LOC_Os01g31629 | Os_chr01    | 17311383               | [C/T] | INTRON                |
| <i>OsMed9_1</i> | LOC_Os01g31629 | Os_chr01    | 17311378               | [A/G] | INTRON                |

| Mediator genes  | MSU locus ID   | Chromosomes | Physical Position (bp) | SNPs  | Structural Annotation |
|-----------------|----------------|-------------|------------------------|-------|-----------------------|
| <i>OsMed9_1</i> | LOC_Os01g31629 | Os_chr01    | 17311367               | [A/C] | INTRON                |
| <i>OsMed9_1</i> | LOC_Os01g31629 | Os_chr01    | 17311273               | [G/A] | INTRON                |
| <i>OsMed9_1</i> | LOC_Os01g31629 | Os_chr01    | 17311241               | [A/G] | INTRON                |
| <i>OsMed9_1</i> | LOC_Os01g31629 | Os_chr01    | 17311176               | [T/C] | INTRON                |
| <i>OsMed9_1</i> | LOC_Os01g31629 | Os_chr01    | 17311116               | [C/T] | INTRON                |
| <i>OsMed9_1</i> | LOC_Os01g31629 | Os_chr01    | 17311112               | [C/T] | INTRON                |
| <i>OsMed9_1</i> | LOC_Os01g31629 | Os_chr01    | 17311105               | [C/A] | INTRON                |
| <i>OsMed9_1</i> | LOC_Os01g31629 | Os_chr01    | 17311091               | [C/T] | INTRON                |
| <i>OsMed9_1</i> | LOC_Os01g31629 | Os_chr01    | 17310999               | [C/T] | INTRON                |
| <i>OsMed9_1</i> | LOC_Os01g31629 | Os_chr01    | 17310959               | [C/T] | INTRON                |
| <i>OsMed9_1</i> | LOC_Os01g31629 | Os_chr01    | 17310954               | [C/A] | INTRON                |
| <i>OsMed9_1</i> | LOC_Os01g31629 | Os_chr01    | 17310945               | [G/A] | INTRON                |
| <i>OsMed9_1</i> | LOC_Os01g31629 | Os_chr01    | 17310909               | [G/T] | INTRON                |
| <i>OsMed9_1</i> | LOC_Os01g31629 | Os_chr01    | 17310898               | [T/A] | INTRON                |
| <i>OsMed9_1</i> | LOC_Os01g31629 | Os_chr01    | 17310845               | [C/T] | INTRON                |
| <i>OsMed9_1</i> | LOC_Os01g31629 | Os_chr01    | 17310841               | [C/T] | INTRON                |
| <i>OsMed9_1</i> | LOC_Os01g31629 | Os_chr01    | 17310808               | [G/C] | INTRON                |
| <i>OsMed9_1</i> | LOC_Os01g31629 | Os_chr01    | 17310778               | [A/G] | INTRON                |
| <i>OsMed9_1</i> | LOC_Os01g31629 | Os_chr01    | 17310720               | [G/A] | INTRON                |
| <i>OsMed9_1</i> | LOC_Os01g31629 | Os_chr01    | 17310705               | [C/T] | INTRON                |
| <i>OsMed9_1</i> | LOC_Os01g31629 | Os_chr01    | 17310688               | [G/C] | INTRON                |
| <i>OsMed9_1</i> | LOC_Os01g31629 | Os_chr01    | 17310650               | [A/G] | INTRON                |
| <i>OsMed9_1</i> | LOC_Os01g31629 | Os_chr01    | 17310585               | [C/T] | INTRON                |
| <i>OsMed9_1</i> | LOC_Os01g31629 | Os_chr01    | 17310456               | [C/T] | INTRON                |
| <i>OsMed9_1</i> | LOC_Os01g31629 | Os_chr01    | 17310449               | [C/T] | INTRON                |
| <i>OsMed9_1</i> | LOC_Os01g31629 | Os_chr01    | 17310422               | [G/A] | INTRON                |
| <i>OsMed9_1</i> | LOC_Os01g31629 | Os_chr01    | 17310397               | [T/C] | INTRON                |
| <i>OsMed9_1</i> | LOC_Os01g31629 | Os_chr01    | 17310373               | [A/C] | INTRON                |
| <i>OsMed9_1</i> | LOC_Os01g31629 | Os_chr01    | 17310357               | [G/A] | INTRON                |
| <i>OsMed9_1</i> | LOC_Os01g31629 | Os_chr01    | 17310349               | [G/A] | INTRON                |
| <i>OsMed9_1</i> | LOC_Os01g31629 | Os_chr01    | 17310331               | [G/A] | INTRON                |
| <i>OsMed9_1</i> | LOC_Os01g31629 | Os_chr01    | 17310251               | [C/T] | INTRON                |
| <i>OsMed9_1</i> | LOC_Os01g31629 | Os_chr01    | 17310224               | [T/G] | INTRON                |
| <i>OsMed9_1</i> | LOC_Os01g31629 | Os_chr01    | 17310216               | [G/A] | INTRON                |
| <i>OsMed9_1</i> | LOC_Os01g31629 | Os_chr01    | 17310209               | [G/T] | INTRON                |
| <i>OsMed9_1</i> | LOC_Os01g31629 | Os_chr01    | 17310180               | [G/A] | INTRON                |
| <i>OsMed9_1</i> | LOC_Os01g31629 | Os_chr01    | 17310167               | [T/C] | INTRON                |
| <i>OsMed9_1</i> | LOC_Os01g31629 | Os_chr01    | 17310144               | [C/T] | INTRON                |
| <i>OsMed9_1</i> | LOC_Os01g31629 | Os_chr01    | 17310081               | [C/T] | INTRON                |
| <i>OsMed9_1</i> | LOC_Os01g31629 | Os_chr01    | 17310065               | [A/G] | INTRON                |
| <i>OsMed9_1</i> | LOC_Os01g31629 | Os_chr01    | 17310046               | [G/T] | INTRON                |
| <i>OsMed9_1</i> | LOC_Os01g31629 | Os_chr01    | 17310043               | [T/C] | INTRON                |
| <i>OsMed9_1</i> | LOC_Os01g31629 | Os_chr01    | 17309735               | [C/A] | INTRON                |
| <i>OsMed9_1</i> | LOC_Os01g31629 | Os_chr01    | 17309678               | [A/G] | INTRON                |
| <i>OsMed9_1</i> | LOC_Os01g31629 | Os_chr01    | 17309677               | [C/T] | INTRON                |
| <i>OsMed9_1</i> | LOC_Os01g31629 | Os_chr01    | 17309670               | [G/A] | INTRON                |
| <i>OsMed9_1</i> | LOC_Os01g31629 | Os_chr01    | 17309666               | [A/G] | INTRON                |



| Mediator genes  | MSU locus ID   | Chromosomes | Physical Position (bp) | SNPs  | Structural Annotation |
|-----------------|----------------|-------------|------------------------|-------|-----------------------|
| <i>OsMed9_1</i> | LOC_Os01g31629 | Os_chr01    | 17309539               | [G/C] | INTRON                |
| <i>OsMed9_1</i> | LOC_Os01g31629 | Os_chr01    | 17309513               | [C/T] | INTRON                |
| <i>OsMed9_1</i> | LOC_Os01g31629 | Os_chr01    | 17309483               | [T/C] | INTRON                |
| <i>OsMed9_1</i> | LOC_Os01g31629 | Os_chr01    | 17309401               | [C/T] | INTRON                |
| <i>OsMed9_1</i> | LOC_Os01g31629 | Os_chr01    | 17309391               | [C/A] | INTRON                |
| <i>OsMed9_1</i> | LOC_Os01g31629 | Os_chr01    | 17309220               | [C/T] | INTRON                |
| <i>OsMed9_1</i> | LOC_Os01g31629 | Os_chr01    | 17309021               | [C/T] | INTRON                |
| <i>OsMed9_1</i> | LOC_Os01g31629 | Os_chr01    | 17309013               | [A/G] | INTRON                |
| <i>OsMed9_1</i> | LOC_Os01g31629 | Os_chr01    | 17308881               | [C/T] | INTRON                |
| <i>OsMed9_1</i> | LOC_Os01g31629 | Os_chr01    | 17308875               | [T/G] | INTRON                |
| <i>OsMed9_1</i> | LOC_Os01g31629 | Os_chr01    | 17324539               | [C/A] | INTRON                |
| <i>OsMed9_1</i> | LOC_Os01g31629 | Os_chr01    | 17308255               | [G/A] | REGULATORY            |
| <i>OsMed9_1</i> | LOC_Os01g31629 | Os_chr01    | 17308565               | [G/T] | REGULATORY            |
| <i>OsMed9_1</i> | LOC_Os01g31629 | Os_chr01    | 17308500               | [G/A] | REGULATORY            |
| <i>OsMed9_1</i> | LOC_Os01g31629 | Os_chr01    | 17325703               | [G/A] | REGULATORY            |
| <i>OsMed9_1</i> | LOC_Os01g31629 | Os_chr01    | 17325642               | [C/A] | REGULATORY            |
| <i>OsMed9_1</i> | LOC_Os01g31629 | Os_chr01    | 17325625               | [C/T] | REGULATORY            |
| <i>OsMed9_1</i> | LOC_Os01g31629 | Os_chr01    | 17325616               | [A/G] | REGULATORY            |
| <i>OsMed9_1</i> | LOC_Os01g31629 | Os_chr01    | 17325499               | [T/G] | REGULATORY            |
| <i>OsMed9_1</i> | LOC_Os01g31629 | Os_chr01    | 17325399               | [G/A] | REGULATORY            |
| <i>OsMed9_1</i> | LOC_Os01g31629 | Os_chr01    | 17325394               | [T/C] | REGULATORY            |
| <i>OsMed9_1</i> | LOC_Os01g31629 | Os_chr01    | 17325322               | [C/T] | REGULATORY            |
| <i>OsMed9_1</i> | LOC_Os01g31629 | Os_chr01    | 17325314               | [T/G] | REGULATORY            |
| <i>OsMed9_1</i> | LOC_Os01g31629 | Os_chr01    | 17325248               | [C/T] | REGULATORY            |
| <i>OsMed9_1</i> | LOC_Os01g31629 | Os_chr01    | 17325221               | [G/A] | REGULATORY            |
| <i>OsMed9_1</i> | LOC_Os01g31629 | Os_chr01    | 17325147               | [C/T] | REGULATORY            |
| <i>OsMed9_1</i> | LOC_Os01g31629 | Os_chr01    | 17325135               | [A/T] | REGULATORY            |
| <i>OsMed9_1</i> | LOC_Os01g31629 | Os_chr01    | 17325056               | [T/G] | REGULATORY            |
| <i>OsMed9_1</i> | LOC_Os01g31629 | Os_chr01    | 17325019               | [G/A] | REGULATORY            |
| <i>OsMed9_1</i> | LOC_Os01g31629 | Os_chr01    | 17325017               | [C/A] | REGULATORY            |
| <i>OsMed9_1</i> | LOC_Os01g31629 | Os_chr01    | 17325016               | [T/A] | REGULATORY            |
| <i>OsMed9_1</i> | LOC_Os01g31629 | Os_chr01    | 17324979               | [T/C] | REGULATORY            |
| <i>OsMed9_1</i> | LOC_Os01g31629 | Os_chr01    | 17324978               | [G/A] | REGULATORY            |
| <i>OsMed9_1</i> | LOC_Os01g31629 | Os_chr01    | 17324967               | [C/T] | REGULATORY            |
| <i>OsMed9_1</i> | LOC_Os01g31629 | Os_chr01    | 17324962               | [C/G] | REGULATORY            |
| <i>OsMed9_1</i> | LOC_Os01g31629 | Os_chr01    | 17324958               | [G/A] | REGULATORY            |
| <i>OsMed9_1</i> | LOC_Os01g31629 | Os_chr01    | 17324923               | [C/T] | REGULATORY            |
| <i>OsMed9_1</i> | LOC_Os01g31629 | Os_chr01    | 17324916               | [A/T] | REGULATORY            |
| <i>OsMed9_1</i> | LOC_Os01g31629 | Os_chr01    | 17324905               | [C/T] | REGULATORY            |
| <i>OsMed9_1</i> | LOC_Os01g31629 | Os_chr01    | 17324896               | [C/T] | REGULATORY            |
| <i>OsMed9_1</i> | LOC_Os01g31629 | Os_chr01    | 17324890               | [C/T] | REGULATORY            |
| <i>OsMed9_1</i> | LOC_Os01g31629 | Os_chr01    | 17324887               | [G/A] | REGULATORY            |
| <i>OsMed9_1</i> | LOC_Os01g31629 | Os_chr01    | 17324860               | [G/A] | REGULATORY            |
| <i>OsMed9_1</i> | LOC_Os01g31629 | Os_chr01    | 17324841               | [C/T] | REGULATORY            |
| <i>OsMed9_1</i> | LOC_Os01g31629 | Os_chr01    | 17324819               | [G/C] | REGULATORY            |
| <i>OsMed9_1</i> | LOC_Os01g31629 | Os_chr01    | 17324809               | [G/A] | REGULATORY            |
| <i>OsMed9_1</i> | LOC_Os01g31629 | Os_chr01    | 17324804               | [T/C] | REGULATORY            |

| Mediator genes  | MSU locus ID   | Chromosomes | Physical Position (bp) | SNPs  | Structural Annotation |
|-----------------|----------------|-------------|------------------------|-------|-----------------------|
| <i>OsMed9_1</i> | LOC_Os01g31629 | Os_chr01    | 17324799               | [G/T] | REGULATORY            |
| <i>OsMed9_1</i> | LOC_Os01g31629 | Os_chr01    | 17324793               | [G/A] | REGULATORY            |
| <i>OsMed9_1</i> | LOC_Os01g31629 | Os_chr01    | 17324777               | [G/A] | REGULATORY            |
| <i>OsMed9_1</i> | LOC_Os01g31629 | Os_chr01    | 17324771               | [T/C] | REGULATORY            |
| <i>OsMed9_1</i> | LOC_Os01g31629 | Os_chr01    | 17324770               | [A/G] | REGULATORY            |
| <i>OsMed9_1</i> | LOC_Os01g31629 | Os_chr01    | 17324740               | [C/G] | REGULATORY            |
| <i>OsMed9_1</i> | LOC_Os01g31629 | Os_chr01    | 17322704               | [C/T] | SYNONYMOUS-CODING     |
| <i>OsMed9_1</i> | LOC_Os01g31629 | Os_chr01    | 17322587               | [T/G] | SYNONYMOUS-CODING     |
| <i>OsMed9_1</i> | LOC_Os01g31629 | Os_chr01    | 17308597               | [A/T] | SYNONYMOUS-CODING     |
| <i>OsMed9_2</i> | LOC_Os03g15560 | Os_chr03    | 8570132                | [T/C] | INTRON                |
| <i>OsMed9_2</i> | LOC_Os03g15560 | Os_chr03    | 8569812                | [C/G] | INTRON                |
| <i>OsMed9_2</i> | LOC_Os03g15560 | Os_chr03    | 8569259                | [C/T] | INTRON                |
| <i>OsMed9_2</i> | LOC_Os03g15560 | Os_chr03    | 8569080                | [C/T] | INTRON                |
| <i>OsMed9_2</i> | LOC_Os03g15560 | Os_chr03    | 8569078                | [C/G] | INTRON                |
| <i>OsMed9_2</i> | LOC_Os03g15560 | Os_chr03    | 8568677                | [C/A] | INTRON                |
| <i>OsMed9_2</i> | LOC_Os03g15560 | Os_chr03    | 8568668                | [A/T] | INTRON                |
| <i>OsMed9_2</i> | LOC_Os03g15560 | Os_chr03    | 8568650                | [C/A] | INTRON                |
| <i>OsMed9_2</i> | LOC_Os03g15560 | Os_chr03    | 8568599                | [G/A] | INTRON                |
| <i>OsMed9_2</i> | LOC_Os03g15560 | Os_chr03    | 8568369                | [T/G] | INTRON                |
| <i>OsMed9_2</i> | LOC_Os03g15560 | Os_chr03    | 8568352                | [G/T] | INTRON                |
| <i>OsMed9_2</i> | LOC_Os03g15560 | Os_chr03    | 8568324                | [C/T] | INTRON                |
| <i>OsMed9_2</i> | LOC_Os03g15560 | Os_chr03    | 8568206                | [A/T] | INTRON                |
| <i>OsMed9_2</i> | LOC_Os03g15560 | Os_chr03    | 8567469                | [C/A] | REGULATORY            |
| <i>OsMed9_2</i> | LOC_Os03g15560 | Os_chr03    | 8570865                | [G/T] | REGULATORY            |
| <i>OsMed9_2</i> | LOC_Os03g15560 | Os_chr03    | 8570647                | [A/G] | REGULATORY            |
| <i>OsMed9_2</i> | LOC_Os03g15560 | Os_chr03    | 8570597                | [G/A] | REGULATORY            |
| <i>OsMed9_2</i> | LOC_Os03g15560 | Os_chr03    | 8570466                | [T/A] | REGULATORY            |
| <i>OsMed9_2</i> | LOC_Os03g15560 | Os_chr03    | 8570384                | [A/G] | REGULATORY            |
| <i>OsMed9_2</i> | LOC_Os03g15560 | Os_chr03    | 8567357                | [C/A] | REGULATORY            |
| <i>OsMed9_2</i> | LOC_Os03g15560 | Os_chr03    | 8567292                | [C/T] | REGULATORY            |
| <i>OsMed9_2</i> | LOC_Os03g15560 | Os_chr03    | 8567274                | [C/T] | REGULATORY            |
| <i>OsMed9_2</i> | LOC_Os03g15560 | Os_chr03    | 8567246                | [T/C] | REGULATORY            |
| <i>OsMed9_2</i> | LOC_Os03g15560 | Os_chr03    | 8567237                | [A/T] | REGULATORY            |
| <i>OsMed9_2</i> | LOC_Os03g15560 | Os_chr03    | 8567194                | [G/A] | REGULATORY            |
| <i>OsMed9_2</i> | LOC_Os03g15560 | Os_chr03    | 8567141                | [C/T] | REGULATORY            |
| <i>OsMed9_2</i> | LOC_Os03g15560 | Os_chr03    | 8567128                | [G/T] | REGULATORY            |
| <i>OsMed9_2</i> | LOC_Os03g15560 | Os_chr03    | 8567100                | [G/A] | REGULATORY            |
| <i>OsMed9_2</i> | LOC_Os03g15560 | Os_chr03    | 8567081                | [C/T] | REGULATORY            |
| <i>OsMed9_2</i> | LOC_Os03g15560 | Os_chr03    | 8567080                | [G/A] | REGULATORY            |
| <i>OsMed9_2</i> | LOC_Os03g15560 | Os_chr03    | 8567079                | [C/T] | REGULATORY            |
| <i>OsMed9_2</i> | LOC_Os03g15560 | Os_chr03    | 8567046                | [G/A] | REGULATORY            |
| <i>OsMed9_2</i> | LOC_Os03g15560 | Os_chr03    | 8567014                | [A/G] | REGULATORY            |
| <i>OsMed9_2</i> | LOC_Os03g15560 | Os_chr03    | 8567004                | [T/A] | REGULATORY            |
| <i>OsMed9_2</i> | LOC_Os03g15560 | Os_chr03    | 8566910                | [G/A] | REGULATORY            |
| <i>OsMed9_2</i> | LOC_Os03g15560 | Os_chr03    | 8566892                | [G/A] | REGULATORY            |
| <i>OsMed9_2</i> | LOC_Os03g15560 | Os_chr03    | 8566888                | [G/A] | REGULATORY            |
| <i>OsMed9_2</i> | LOC_Os03g15560 | Os_chr03    | 8566881                | [G/A] | REGULATORY            |

| Mediator genes  | MSU locus ID   | Chromosomes | Physical Position (bp) | SNPs  | Structural Annotation |
|-----------------|----------------|-------------|------------------------|-------|-----------------------|
| <i>OsMed9_2</i> | LOC_Os03g15560 | Os_chr03    | 8566874                | [C/T] | REGULATORY            |
| <i>OsMed9_2</i> | LOC_Os03g15560 | Os_chr03    | 8566869                | [A/G] | REGULATORY            |
| <i>OsMed9_2</i> | LOC_Os03g15560 | Os_chr03    | 8566858                | [C/T] | REGULATORY            |
| <i>OsMed9_2</i> | LOC_Os03g15560 | Os_chr03    | 8566850                | [C/T] | REGULATORY            |
| <i>OsMed9_2</i> | LOC_Os03g15560 | Os_chr03    | 8566846                | [G/A] | REGULATORY            |
| <i>OsMed9_2</i> | LOC_Os03g15560 | Os_chr03    | 8566839                | [T/A] | REGULATORY            |
| <i>OsMed9_2</i> | LOC_Os03g15560 | Os_chr03    | 8566838                | [G/A] | REGULATORY            |
| <i>OsMed9_2</i> | LOC_Os03g15560 | Os_chr03    | 8566835                | [G/C] | REGULATORY            |
| <i>OsMed9_2</i> | LOC_Os03g15560 | Os_chr03    | 8566831                | [C/T] | REGULATORY            |
| <i>OsMed9_2</i> | LOC_Os03g15560 | Os_chr03    | 8566783                | [G/A] | REGULATORY            |
| <i>OsMed9_2</i> | LOC_Os03g15560 | Os_chr03    | 8566759                | [G/A] | REGULATORY            |
| <i>OsMed9_2</i> | LOC_Os03g15560 | Os_chr03    | 8566754                | [G/A] | REGULATORY            |
| <i>OsMed9_2</i> | LOC_Os03g15560 | Os_chr03    | 8566736                | [G/A] | REGULATORY            |
| <i>OsMed9_2</i> | LOC_Os03g15560 | Os_chr03    | 8566730                | [G/A] | REGULATORY            |
| <i>OsMed9_2</i> | LOC_Os03g15560 | Os_chr03    | 8566721                | [G/C] | REGULATORY            |
| <i>OsMed9_2</i> | LOC_Os03g15560 | Os_chr03    | 8566718                | [A/G] | REGULATORY            |
| <i>OsMed9_2</i> | LOC_Os03g15560 | Os_chr03    | 8566715                | [T/C] | REGULATORY            |
| <i>OsMed9_2</i> | LOC_Os03g15560 | Os_chr03    | 8566714                | [T/A] | REGULATORY            |
| <i>OsMed9_2</i> | LOC_Os03g15560 | Os_chr03    | 8566705                | [G/A] | REGULATORY            |
| <i>OsMed9_2</i> | LOC_Os03g15560 | Os_chr03    | 8566686                | [C/T] | REGULATORY            |
| <i>OsMed9_2</i> | LOC_Os03g15560 | Os_chr03    | 8566524                | [A/T] | REGULATORY            |
| <i>OsMed9_2</i> | LOC_Os03g15560 | Os_chr03    | 8570308                | [G/A] | SYNONYMOUS-CODING     |
| <i>OsMed9_2</i> | LOC_Os03g15560 | Os_chr03    | 8569593                | [G/C] | SYNONYMOUS-CODING     |
| <i>OsMed9_2</i> | LOC_Os03g15560 | Os_chr03    | 8567574                | [C/T] | SYNONYMOUS-CODING     |

**Table S2.** Statistical measures for grain size trait evaluated in an association panel

| <b>Grain size Traits</b> | <b>384 rice accessions</b>        |              |                                        |                                                      |
|--------------------------|-----------------------------------|--------------|----------------------------------------|------------------------------------------------------|
|                          | <b>Mean <math>\pm</math> S.D.</b> | <b>Range</b> | <b>Coefficient of variation (CV %)</b> | <b>Broad-sense Heritability (<math>H^2</math> %)</b> |
| Grain length (mm)        | 8.5 $\pm$ 0.71                    | 6.6 - 11.2   | 8                                      | 75                                                   |
| Grain width (mm)         | 2.8 $\pm$ 0.31                    | 1.9 - 3.5    | 11                                     | 73                                                   |
| 1000-grain weight (g)    | 26.5 $\pm$ 4.8                    | 15.4 - 39.2  | 18                                     | 82                                                   |

**Table S3.** ANOVA-based summary effect of grain size/weight trait measured in 384 rice accessions belonging to an association panel

| Traits                         | Environments |                        | Source of variation |                         |             |             |
|--------------------------------|--------------|------------------------|---------------------|-------------------------|-------------|-------------|
|                                | Years        | Geographical locations | Replication         | Genotype (G)/Accessions | Block (Rep) | Error (e)   |
| 1000-grain weight (g)<br>(GWg) | 2012         | New Delhi              | 41.8 (1)**          | 139.7 (383)*            | 18.7*       | 4.7 (383)** |
|                                | 2012         | Tamil Nadu             | 63.7 (1)*           | 187.6 (383)**           | 25.5*       | 7.5 (380)*  |
|                                | 2013         | New Delhi              | 52.5 (1)*           | 153.7 (383)**           | 21.4*       | 4.2 (383)*  |
|                                | 2013         | Tamil Nadu             | 71.3 (1)*           | 198.1 (383)**           | 29.8**      | 8.1 (380)*  |

Degree of freedom (*df*) are mentioned within Parentheses

\*significant at 0.01 and \*\*significant at 0.001

**Table S4:  $-\Delta C_t$  (Ct Ubiquitin- Ct Gene) values along with standard deviation used for heat map generation**

| Avg.       |          |          |          |          |          |          | Stdv.      |          |          |          |          |          |          |
|------------|----------|----------|----------|----------|----------|----------|------------|----------|----------|----------|----------|----------|----------|
| OsMED9_1   |          |          |          |          |          |          |            |          |          |          |          |          |          |
|            | S1       | S2       | S3       | S4       | S5       | Lf       |            | S1       | S2       | S3       | S4       | S5       | Lf       |
| LGR        | -1.33744 | -1.56478 | -2.76861 | -0.23278 | -0.9955  | -1.70456 | LGR        | 0.24222  | 0.169536 | 0.264592 | 0.219032 | 0.097817 | 0.385333 |
| PB1121     | -1.61811 | -2.38833 | -2.29111 | 0.067889 | -0.69517 | -1.52967 | PB1121     | 0.216836 | 0.333282 | 0.45031  | 0.42846  | 0.141186 | 0.02687  |
| IR64       | -1.90822 | -2.78567 | -2.03544 | 0.505    | 0.626444 | -1.108   | IR64       | 0.101802 | 0.057831 | 0.34862  | 0.284728 | 0.392833 | 0.269141 |
| NIPPONBARE | -1.48989 | -2.49489 | -1.80611 | 0.753167 | -0.88278 | -1.05083 | NIPPONBARE | 0.262705 | 0.091836 | 0.10328  | 0.120444 | 0.204995 | 0.305725 |
| SONASAL    | -1.22933 | -1.94744 | -1.55833 | -0.05417 | -0.88333 | -0.73922 | SONASAL    | 0.231118 | 0.259428 | 0.196363 | 0.132229 | 0.198986 | 0.148937 |
| BINDLI     | -1.12044 | -1.767   | -3.16822 | -1.05322 | -0.37683 | -0.97228 | BINDLI     | 0.105579 | 0.253885 | 0.088366 | 0.137662 | 0.16287  | 0.226905 |
| OsMED5_3   |          |          |          |          |          |          |            |          |          |          |          |          |          |
|            | S1       | S2       | S3       | S4       | S5       | Lf       |            | S1       | S2       | S3       | S4       | S5       | Lf       |
| LGR        | -3.11911 | -2.45633 | -4.33467 | -3.90122 | -2.52178 | -1.0745  | LGR        | 0.100087 | 0.340518 | 0.275625 | 0.16417  | 0.346255 | 0.20294  |
| PB1121     | -2.01478 | -2.68856 | -3.26433 | -2.954   | -0.08567 | -0.92967 | PB1121     | 0.198001 | 0.506498 | 0.176306 | 0.249673 | 0.18479  | 0.151339 |
| IR64       | -3.06244 | -3.85633 | -4.78183 | -1.95517 | -0.36289 | -1.519   | IR64       | 0.187153 | 0.305825 | 0.292978 | 0.079904 | 0.152103 | 0.017442 |
| NIPPONBARE | -2.333   | -2.027   | -2.40167 | -1.60278 | -0.61267 | -0.41244 | NIPPONBARE | 0.269796 | 0.146117 | 0.167365 | 0.211217 | 0.123847 | 0.233936 |
| SONASAL    | -1.6915  | -0.63367 | -1.53333 | -1.3145  | 0.322    | -0.42589 | SONASAL    | 0.033706 | 0.102766 | 0.373872 | 0.329748 | 0.084853 | 0.127329 |
| BINDLI     | -1.25244 | -1.58211 | -2.48144 | -3.15556 | -0.48633 | -1.15567 | BINDLI     | 0.298134 | 0.468044 | 0.140501 | 0.214785 | 0.276588 | 0.301511 |
| OsMED11_1  |          |          |          |          |          |          |            |          |          |          |          |          |          |
|            | S1       | S2       | S3       | S4       | S5       | Lf       |            | S1       | S2       | S3       | S4       | S5       | Lf       |
| LGR        | -0.51578 | -1.08678 | -0.84422 | -0.56556 | -0.79433 | 0.223667 | LGR        | 0.119071 | 0.366895 | 0.114086 | 0.256991 | 0.05624  | 0.34686  |
| PB1121     | -1.19322 | -1.44433 | -0.29778 | -0.76822 | -0.01967 | -0.44822 | PB1121     | 0.214226 | 0.020743 | 0.190977 | 0.183669 | 0.12855  | 0.147938 |
| IR64       | -0.91456 | -1.54767 | -0.73744 | -1.03083 | -0.43444 | -0.358   | IR64       | 0.158386 | 0.144634 | 0.161579 | 0.267051 | 0.152155 | 0.04973  |
| NIPPONBARE | -1.246   | -1.18467 | -0.22811 | -0.51056 | -0.41667 | 0.257278 | NIPPONBARE | 0.09938  | 0.212281 | 0.086923 | 0.050859 | 0.035554 | 0.227535 |
| SONASAL    | -1.38089 | -1.009   | -0.47689 | 0.101111 | -0.18878 | -0.61389 | SONASAL    | 0.220292 | 0.174707 | 0.042505 | 0.094536 | 0.189919 | 0.071511 |
| BINDLI     | -0.63967 | -1.10033 | -0.31433 | -0.89567 | -0.23033 | -0.32833 | BINDLI     | 0.309241 | 0.387824 | 0.018856 | 0.225569 | 0.033942 | 0.324663 |
| OsMED14_1  |          |          |          |          |          |          |            |          |          |          |          |          |          |
|            | S1       | S2       | S3       | S4       | S5       | Lf       |            | S1       | S2       | S3       | S4       | S5       | Lf       |
| LGR        | -0.63533 | -0.44433 | -2.05856 | -0.64956 | 0.182111 | 2.116666 | LGR        | 0.228687 | 0.284727 | 0.438177 | 0.302283 | 0.46786  | 0.380443 |
| PB1121     | -0.10889 | -0.814   | -1.07983 | -0.08817 | 0.707667 | 2.3605   | PB1121     | 0.227551 | 0.042897 | 0.000708 | 0.281349 | 0.164992 | 0.254559 |
| IR64       | 0.551667 | -2.23744 | -2.62433 | -0.725   | 0.603667 | 1.896833 | IR64       | 0.112148 | 0.226204 | 0.179134 | 0.141893 | 0.088962 | 0.002593 |
| NIPPONBARE | -1.12883 | -0.63017 | -0.26244 | 0.519445 | 1.289889 | 1.925111 | NIPPONBARE | 0.15297  | 0.041248 | 0.153339 | 0.116871 | 0.267983 | 0.404036 |
| SONASAL    | -0.54683 | 0.381888 | 0.023333 | 0.379889 | 1.006889 | 2.876    | SONASAL    | 0.276008 | 0.100211 | 0.011314 | 0.348105 | 0.184418 | 0.438124 |
| BINDLI     | -0.49783 | -0.35994 | -0.98444 | -0.37842 | 1.515556 | 1.412333 | BINDLI     | 0.062933 | 0.172879 | 0.246791 | 0.160631 | 0.055732 | 0.558143 |

Avg.

Stdev.

*OsMED37\_3*

|                   | S1       | S2       | S3       | S4       | S5       | Lf       |
|-------------------|----------|----------|----------|----------|----------|----------|
| <b>LGR</b>        | 1.339    | 0.909166 | 0.392    | 1.593556 | 0.901334 | 3.117222 |
| <b>PB1121</b>     | -1.47456 | -1.32283 | -0.58717 | -0.13467 | -0.25044 | 0.274667 |
| <b>IR64</b>       | 3.865111 | 3.511778 | 2.151166 | 2.956166 | 1.2885   | 2.130111 |
| <b>NIPPONBARE</b> | -0.66567 | -1.23483 | -0.81889 | -0.43878 | 2.688    | -1.37722 |
| <b>SONASAL</b>    | 0.468444 | 0.535222 | 0.287555 | 2.392889 | 0.106444 | 1.182333 |
| <b>BINDLI</b>     | 2.442666 | 2.812    | 1.849444 | -0.93933 | -0.37333 | -1.55467 |

|                   | S1       | S2       | S3       | S4       | S5       | Lf       |
|-------------------|----------|----------|----------|----------|----------|----------|
| <b>LGR</b>        | 0.227461 | 0.199169 | 0.071183 | 0.202553 | 0.026623 | 0.394973 |
| <b>PB1121</b>     | 0.26682  | 0.236881 | 0.015321 | 0.357795 | 0.172081 | 0.072125 |
| <b>IR64</b>       | 0.145598 | 0.121788 | 0.554844 | 0.287321 | 0.028049 | 0.623033 |
| <b>NIPPONBARE</b> | 0.300281 | 0.000236 | 0.095112 | 0.247353 | 0.118794 | 0.177166 |
| <b>SONASAL</b>    | 0.246708 | 0.119127 | 0.229057 | 0.067479 | 0.071999 | 0.048555 |
| <b>BINDLI</b>     | 0.178234 | 0.190202 | 0.346168 | 0.104639 | 0.193402 | 0.22598  |

*OsMED25\_1*

|                   | S1       | S2       | S3       | S4       | S5       | Lf       |
|-------------------|----------|----------|----------|----------|----------|----------|
| <b>LGR</b>        | -0.56133 | 0.151667 | -0.96978 | -0.19733 | 0.622111 | 0.339    |
| <b>PB1121</b>     | -1.72756 | -0.47517 | -0.47244 | -0.617   | -0.27511 | 0.289667 |
| <b>IR64</b>       | -1.16817 | -1.09989 | -1.349   | 0.055667 | -0.299   | 1.272833 |
| <b>NIPPONBARE</b> | -1.10811 | -0.06733 | 0.096111 | 0.599    | 0.792555 | 0.957556 |
| <b>SONASAL</b>    | -0.52067 | 0.832444 | 0.285166 | 0.183111 | 0.434166 | 1.780444 |
| <b>BINDLI</b>     | -0.85133 | -0.21222 | -0.33183 | -0.07033 | 1.241666 | 0.8525   |

|                   | S1       | S2       | S3       | S4       | S5       | Lf       |
|-------------------|----------|----------|----------|----------|----------|----------|
| <b>LGR</b>        | 0.212717 | 0.424301 | 0.247404 | 0.220031 | 0.086632 | 0.345012 |
| <b>PB1121</b>     | 0.133547 | 0.279778 | 0.460999 | 0.178779 | 0.276914 | 0.443097 |
| <b>IR64</b>       | 0.07759  | 0.255913 | 0.167349 | 0.216648 | 0.157117 | 0.154856 |
| <b>NIPPONBARE</b> | 0.261922 | 0.175361 | 0.131477 | 0.160327 | 0.19842  | 0.14983  |
| <b>SONASAL</b>    | 0.467174 | 0.1053   | 0.039833 | 0.383278 | 0.064818 | 0.309674 |
| <b>BINDLI</b>     | 0.140949 | 0.06979  | 0.317641 | 0.066467 | 0.269105 | 0.089317 |

*OsMED15\_1*

|                   | S1       | S2       | S3       | S4       | S5       | Lf       |
|-------------------|----------|----------|----------|----------|----------|----------|
| <b>LGR</b>        | -7.40678 | -5.80433 | -2.41944 | -2.06867 | -2.97944 | -8.52056 |
| <b>PB1121</b>     | -6.44289 | -3.55117 | -1.95183 | -4.64744 | -1.44267 | -9.08383 |
| <b>IR64</b>       | -14.3108 | -8.27506 | -8.01267 | -2.30144 | -5.56089 | -11.8482 |
| <b>NIPPONBARE</b> | -7.129   | -2.57533 | -1.41511 | -1.7655  | -2.39633 | -8.40222 |
| <b>SONASAL</b>    | -2.818   | -1.381   | -1.20333 | -1.61183 | -1.67617 | -6.09144 |
| <b>BINDLI</b>     | -5.38667 | -4.10333 | -2.15156 | -2.39933 | -1.84689 | -8.95767 |

|                   | S1       | S2       | S3       | S4       | S5       | Lf       |
|-------------------|----------|----------|----------|----------|----------|----------|
| <b>LGR</b>        | 0.48252  | 0.344374 | 0.263434 | 0.43646  | 0.365106 | 0.764332 |
| <b>PB1121</b>     | 0.385341 | 0.269408 | 0.268936 | 0.509749 | 0.293214 | 0.049262 |
| <b>IR64</b>       | 1.032139 | 0.346981 | 0.9452   | 0.191996 | 0.213395 | 0.469272 |
| <b>NIPPONBARE</b> | 0.314848 | 0.300401 | 0.097766 | 0.152028 | 0.265102 | 0.692009 |
| <b>SONASAL</b>    | 0.575388 | 0.007424 | 0.115023 | 0.325172 | 0.268465 | 0.5198   |
| <b>BINDLI</b>     | 0.330535 | 0.382267 | 0.401713 | 0.010371 | 0.258958 | 0.708994 |

*OsMED20\_1*

|                   | S1       | S2       | S3       | S4       | S5       | Lf       |
|-------------------|----------|----------|----------|----------|----------|----------|
| <b>LGR</b>        | -3.24033 | -3.09178 | -4.88611 | -4.28189 | -3.58744 | -1.82622 |
| <b>PB1121</b>     | -1.87183 | -2.23922 | -3.0545  | -2.12567 | -0.4215  | -1.53767 |
| <b>IR64</b>       | -3.498   | -4.10856 | -5.51711 | -2.59828 | -1.917   | -2.69278 |
| <b>NIPPONBARE</b> | -1.9795  | -1.82467 | -2.255   | -1.82833 | -1.821   | -0.14956 |
| <b>SONASAL</b>    | -0.791   | -0.13467 | -0.9055  | -0.81717 | -0.74467 | -0.52033 |
| <b>BINDLI</b>     | -0.98011 | -1.47633 | -2.41933 | -2.24922 | -0.786   | -1.14144 |

|                   | S1       | S2       | S3       | S4       | S5       | Lf       |
|-------------------|----------|----------|----------|----------|----------|----------|
| <b>LGR</b>        | 0.148021 | 0.024745 | 0.258555 | 0.027718 | 0.007582 | 0.252744 |
| <b>PB1121</b>     | 0.103944 | 0.264011 | 0.118086 | 0.381883 | 0.001179 | 0.428812 |
| <b>IR64</b>       | 0.294614 | 0.158432 | 0.381875 | 0.10441  | 0.060339 | 0.516966 |
| <b>NIPPONBARE</b> | 0.180784 | 0.153386 | 0.12901  | 0.356255 | 0.355115 | 0.378662 |
| <b>SONASAL</b>    | 0.150378 | 0.133879 | 0.096402 | 0.393387 | 0.183376 | 0.298681 |
| <b>BINDLI</b>     | 0.190053 | 0.049498 | 0.312925 | 0.032662 | 0.246662 | 0.520213 |

| Avg.              |          |          |          |          |          |          | Stdev.            |          |          |          |          |          |          |
|-------------------|----------|----------|----------|----------|----------|----------|-------------------|----------|----------|----------|----------|----------|----------|
| <i>OsMED12_2</i>  |          |          |          |          |          |          |                   |          |          |          |          |          |          |
|                   | S1       | S2       | S3       | S4       | S5       | Lf       |                   | S1       | S2       | S3       | S4       | S5       | Lf       |
| <b>LGR</b>        | -3.16478 | -4.23167 | -0.96117 | 1.864111 | 2.229112 | -2.71417 | <b>LGR</b>        | 0.076085 | 0.151791 | 0.017678 | 0.239697 | 0.155544 | 0.210482 |
| <b>PB1121</b>     | -3.51889 | -4.28167 | -0.56833 | -0.30622 | -1.36344 | -3.17589 | <b>PB1121</b>     | 0.32371  | 0.425206 | 0.279061 | 0.595721 | 0.24688  | 0.262652 |
| <b>IR64</b>       | -3.54778 | -4.95633 | -0.80733 | 0.5895   | -1.13367 | -2.84422 | <b>IR64</b>       | 0.761631 | 0.276171 | 0.26936  | 0.38726  | 0.309371 | 0.211748 |
| <b>NIPPONBARE</b> | -2.98611 | -2.63367 | 0.519556 | 1.076222 | 1.694667 | -2.37367 | <b>NIPPONBARE</b> | 0.20919  | 0.338202 | 0.254578 | 0.110695 | 0.150727 | 0.098524 |
| <b>SONASAL</b>    | -2.02417 | -2.52089 | -0.45417 | 0.231889 | -0.85156 | -3.23389 | <b>SONASAL</b>    | 0.092631 | 0.119333 | 0.154385 | 0.357824 | 0.042458 | 0.2688   |
| <b>BINDLI</b>     | -2.54411 | -3.94111 | 0.700666 | 1.297778 | 1.222111 | -3.80744 | <b>BINDLI</b>     | 0.06837  | 0.064188 | 0.302045 | 0.097189 | 0.160959 | 0.274468 |

| <i>OsMED4_2</i>   |          |          |          |          |          |          |                   |          |          |          |          |          |          |
|-------------------|----------|----------|----------|----------|----------|----------|-------------------|----------|----------|----------|----------|----------|----------|
|                   | S1       | S2       | S3       | S4       | S5       | Lf       |                   | S1       | S2       | S3       | S4       | S5       | Lf       |
| <b>LGR</b>        | -13.6527 | -12.0522 | -12.2466 | -12.6138 | -9.67017 | -10.8797 | <b>LGR</b>        | 0.361902 | 0.1525   | 0.37639  | 0.396632 | 0.086891 | 0.507329 |
| <b>PB1121</b>     | -15.0387 | -12.2937 | -11.999  | -3.396   | -1.36717 | -10.8843 | <b>PB1121</b>     | 0.127279 | 1.186173 | 0.225332 | 0.096167 | 0.051618 | 0.10703  |
| <b>IR64</b>       | -14.107  | -17.6698 | -13.6473 | -5.51311 | -2.137   | -11.9053 | <b>IR64</b>       | 0.068824 | 1.612611 | 1.080404 | 0.278418 | 0.016499 | 0.337915 |
| <b>NIPPONBARE</b> | -11.3294 | -11.8575 | -8.89389 | -11.3445 | -8.89178 | -12.3734 | <b>NIPPONBARE</b> | 0.251122 | 0.04549  | 0.375861 | 1.146769 | 0.405702 | 0.359215 |
| <b>SONASAL</b>    | -3.86817 | -3.66422 | -4.03878 | -3.47333 | -1.1635  | -11.7537 | <b>SONASAL</b>    | 0.170413 | 0.21754  | 0.331454 | 0.461977 | 0.048791 | 0.283498 |
| <b>BINDLI</b>     | -12.0583 | -12.6122 | -11.3115 | -11.3725 | -8.948   | -10.5996 | <b>BINDLI</b>     | 0.156978 | 0.69452  | 0.266579 | 1.616479 | 0.436802 | 0.183806 |

**Avg.= Average  $-\Delta\text{Ct}$  values calculated for three biological replicates**

**Stdev.= Standard deviation calculated for  $-\Delta\text{Ct}$  from three biological replicates**



**Table S5.** Primers used for differential expression analysis of grain size/weight-associated *MED* genes in rice

| Gene accession IDs | Gene identities  | Forward Primer sequence (5'-3') | Reverse Primer sequences (5'-3') | Amplified fragment size (bp) | Annealing temperature (°C) |
|--------------------|------------------|---------------------------------|----------------------------------|------------------------------|----------------------------|
| LOC_Os11g05150     | <i>OsMED4_2</i>  | GCAAAAGGATGGTGGAAACCA           | AGGCCTGGAAATTCTGAAGATCT          | 67                           | 60                         |
| LOC_Os07g48350     | <i>OsMED5_3</i>  | GGAAAATGGTCCCGATGAATG           | TTCGATGGAATGAAGAGAAGCA           | 65                           | 60                         |
| LOC_Os02g09600     | <i>OsMED11_1</i> | CACAAGTGTGACTGAGCGGTTT          | GCATTTGCAAGCTGGCTACA             | 63                           | 60                         |
| LOC_Os10g40260     | <i>OsMED12_2</i> | TCAAGTGGCTATGCCGATTCT           | GAGGACAGTAGAGGAGGACCACAT         | 72                           | 60                         |
| LOC_Os08g24400     | <i>OsMED14_1</i> | CAGCAGGTTTCCTTTGGTTCATT         | GTCTCATGGCTAGAGAGGGTTGA          | 62                           | 60                         |
| LOC_Os04g03860     | <i>OsMED15_1</i> | CACATCGCAATCGCAGCTTA            | ACAAGCACGGCATGAATCAA             | 61                           | 60                         |
| LOC_Os09g27140     | <i>OsMED20_1</i> | TGACTTTTGCCTGAGGATTGG           | CATCATGATTCCCCTCAGTGTTT          | 67                           | 60                         |
| LOC_Os09g13610     | <i>OsMED25_1</i> | TTCATTGTCGGTGGTATCTCCTAA        | TTCCTCTTTGCCGCATTGTAT            | 69                           | 60                         |
| LOC_Os03g16860     | <i>OsMED37_3</i> | TGCTGATCCCCAGGAACAC             | CGAACTTGCCGAGCAGGTT              | 144                          | 60                         |
| LOC_Os01g22490     | <i>UBQ5</i>      | ACCACTTCGACCGCCACTACT           | ACGCCTAAGCCTGCTGGTT              | 69                           | 60                         |
